# Supplementary material (part 5 of 17)
Source: ML conference proceedings conference paper supplement (https://openreview.net/forum?id=jLC662Yo5h)

sample

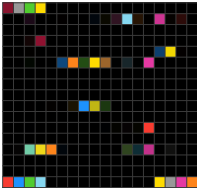

sample average

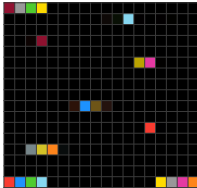

guess 1

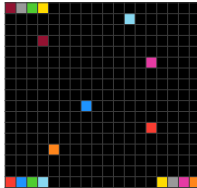

guess 2

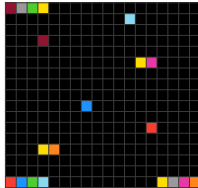

Supplement: supplementary_material [file 5af49b42_solutions.pdf › CompressARC/results_for_the_blog_post/plots_evaluation/5af49b42_solutions.pdf]

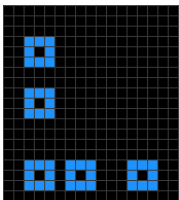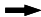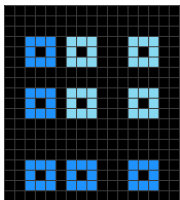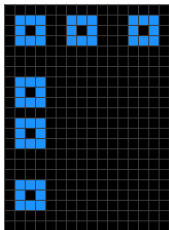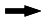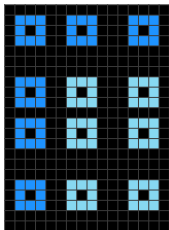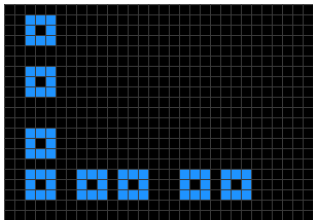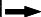

?

Supplement: supplementary_material [file 5b526a93_problem.pdf › CompressARC/results_for_the_blog_post/plots_evaluation/5b526a93_problem.pdf]

sample

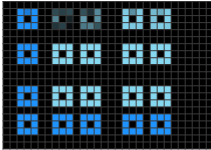

sample average

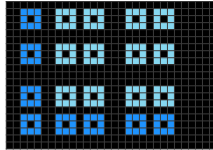

guess 1

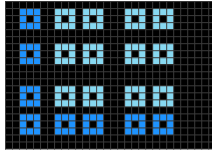

guess 2

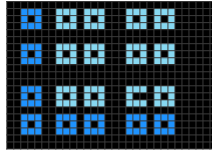

Supplement: supplementary_material [file 5b526a93_solutions.pdf › CompressARC/results_for_the_blog_post/plots_evaluation/5b526a93_solutions.pdf]

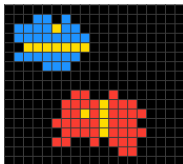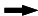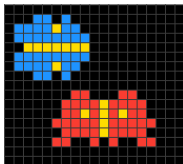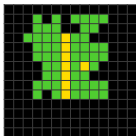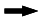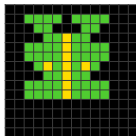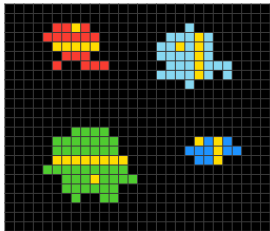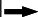

?

Supplement: supplementary_material [file 5b692c0f_problem.pdf › CompressARC/results_for_the_blog_post/plots_evaluation/5b692c0f_problem.pdf]

sample

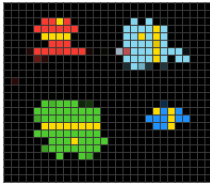

sample average

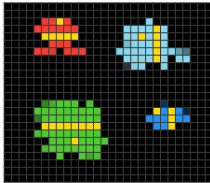

guess 1

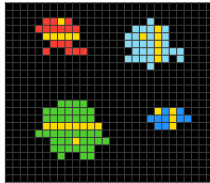

guess 2

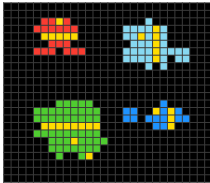

Supplement: supplementary_material [file 5b692c0f_solutions.pdf › CompressARC/results_for_the_blog_post/plots_evaluation/5b692c0f_solutions.pdf]

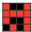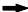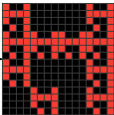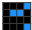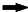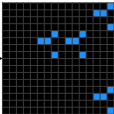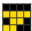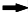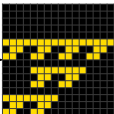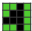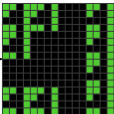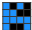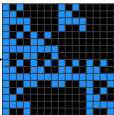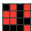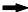

?

Supplement: supplementary_material [file 5b6cbef5_problem.pdf › CompressARC/results_for_the_blog_post/plots_evaluation/5b6cbef5_problem.pdf]

sample

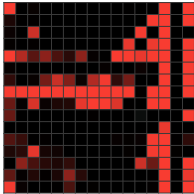

sample average

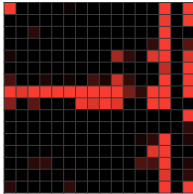

guess 1

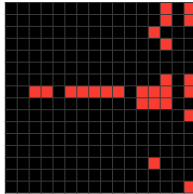

guess 2

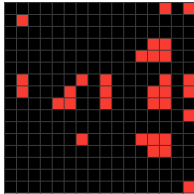

Supplement: supplementary_material [file 5b6cbef5_solutions.pdf › CompressARC/results_for_the_blog_post/plots_evaluation/5b6cbef5_solutions.pdf]

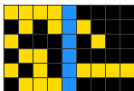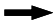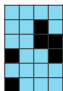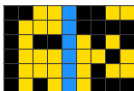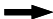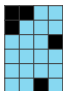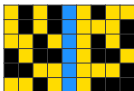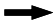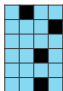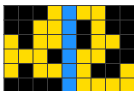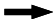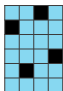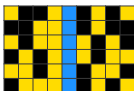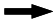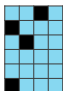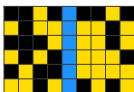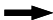

?

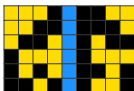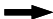

?

Supplement: supplementary_material [file 5d2a5c43_problem.pdf › CompressARC/results_for_the_blog_post/plots_evaluation/5d2a5c43_problem.pdf]

sample

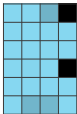

sample average

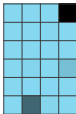

guess 1

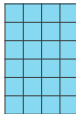

guess 2

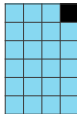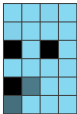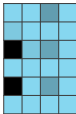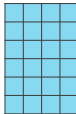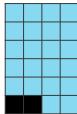

Supplement: supplementary_material [file 5d2a5c43_solutions.pdf › CompressARC/results_for_the_blog_post/plots_evaluation/5d2a5c43_solutions.pdf]

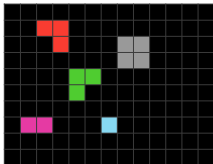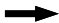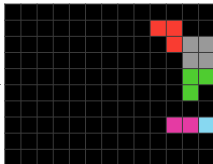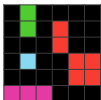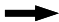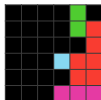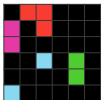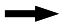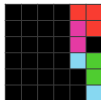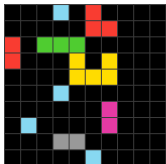

?

Supplement: supplementary_material [file 5ffb2104_problem.pdf › CompressARC/results_for_the_blog_post/plots_evaluation/5ffb2104_problem.pdf]

sample

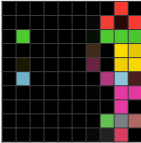

sample average

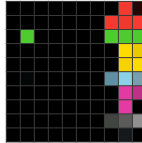

guess 1

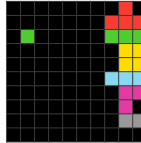

guess 2

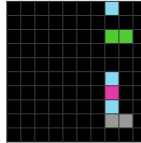

Supplement: supplementary_material [file 5ffb2104_solutions.pdf › CompressARC/results_for_the_blog_post/plots_evaluation/5ffb2104_solutions.pdf]

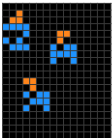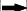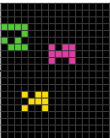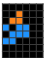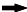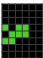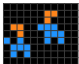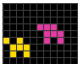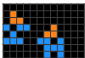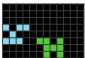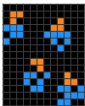

?

Supplement: supplementary_material [file 604001fa_problem.pdf › CompressARC/results_for_the_blog_post/plots_evaluation/604001fa_problem.pdf]

sample

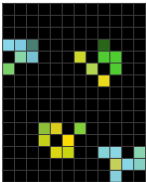

sample average

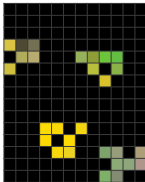

guess 1

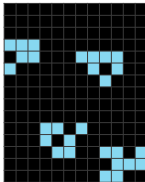

guess 2

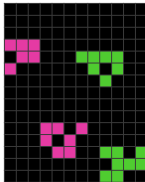

Supplement: supplementary_material [file 604001fa_solutions.pdf › CompressARC/results_for_the_blog_post/plots_evaluation/604001fa_solutions.pdf]

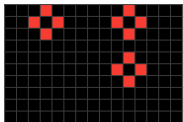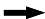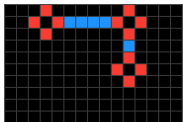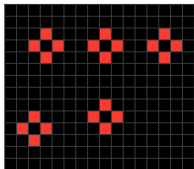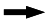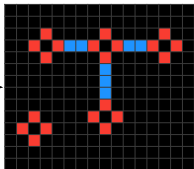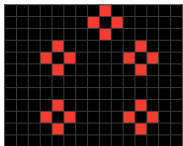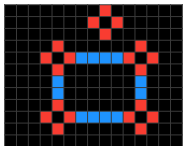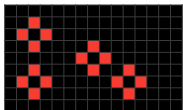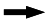

?

Supplement: supplementary_material [file 60a26a3e_problem.pdf › CompressARC/results_for_the_blog_post/plots_evaluation/60a26a3e_problem.pdf]

sample

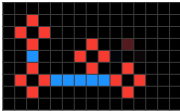

sample average

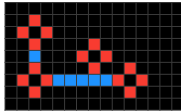

guess 1

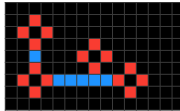

guess 2

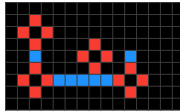

Supplement: supplementary_material [file 60a26a3e_solutions.pdf › CompressARC/results_for_the_blog_post/plots_evaluation/60a26a3e_solutions.pdf]

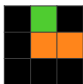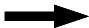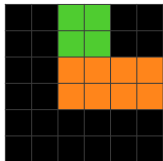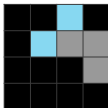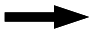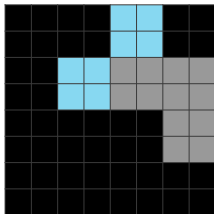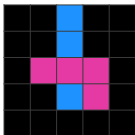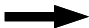

?

Supplement: supplementary_material [file 60c09cac_problem.pdf › CompressARC/results_for_the_blog_post/plots_evaluation/60c09cac_problem.pdf]

sample

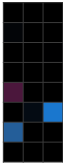

sample average

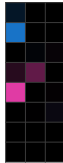

guess 1

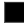

guess 2

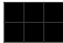

Supplement: supplementary_material [file 60c09cac_solutions.pdf › CompressARC/results_for_the_blog_post/plots_evaluation/60c09cac_solutions.pdf]

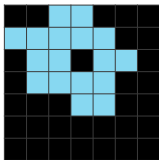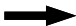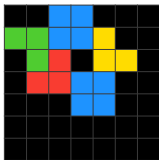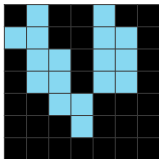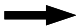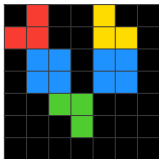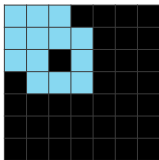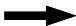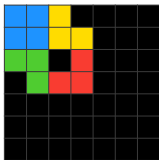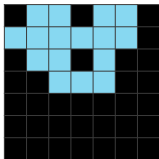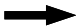

?

Supplement: supplementary_material [file 626c0bcc_problem.pdf › CompressARC/results_for_the_blog_post/plots_evaluation/626c0bcc_problem.pdf]

sample

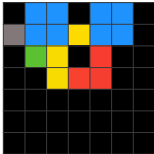

sample average

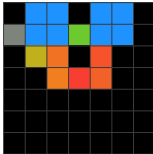

guess 1

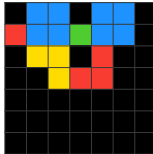

guess 2

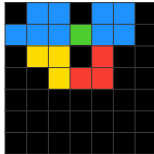

Supplement: supplementary_material [file 626c0bcc_solutions.pdf › CompressARC/results_for_the_blog_post/plots_evaluation/626c0bcc_solutions.pdf]

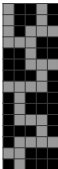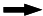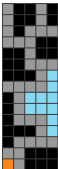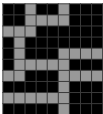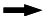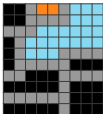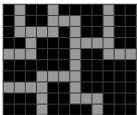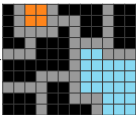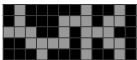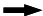

?

Supplement: supplementary_material [file 62ab2642_problem.pdf › CompressARC/results_for_the_blog_post/plots_evaluation/62ab2642_problem.pdf]

sample

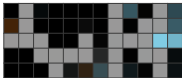

sample average

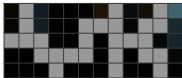

guess 1

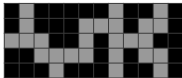

guess 2

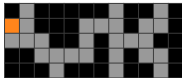

Supplement: supplementary_material [file 62ab2642_solutions.pdf › CompressARC/results_for_the_blog_post/plots_evaluation/62ab2642_solutions.pdf]

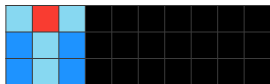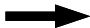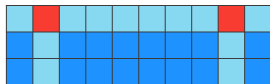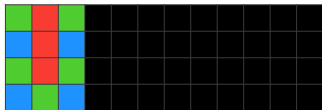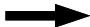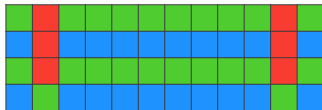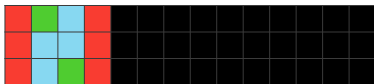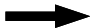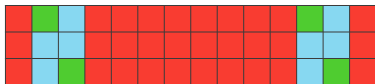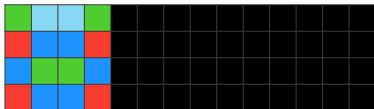

?

Supplement: supplementary_material [file 62b74c02_problem.pdf › CompressARC/results_for_the_blog_post/plots_evaluation/62b74c02_problem.pdf]

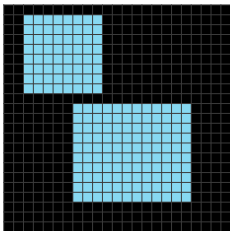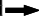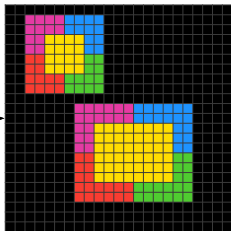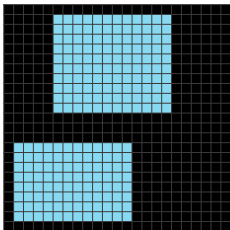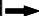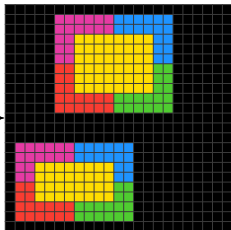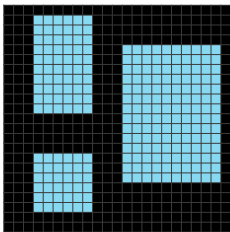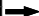

?

Supplement: supplementary_material [file 639f5a19_problem.pdf › CompressARC/results_for_the_blog_post/plots_evaluation/639f5a19_problem.pdf]

sample

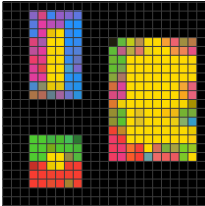

sample average

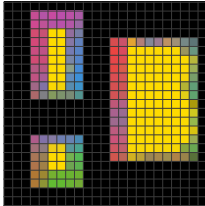

guess 1

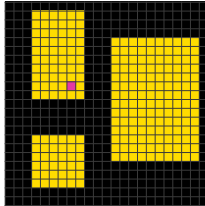

guess 2

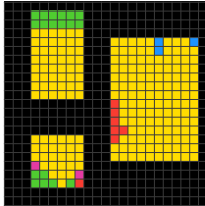

Supplement: supplementary_material [file 639f5a19_solutions.pdf › CompressARC/results_for_the_blog_post/plots_evaluation/639f5a19_solutions.pdf]

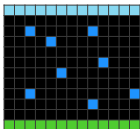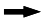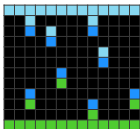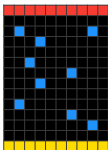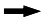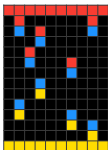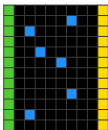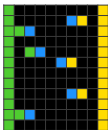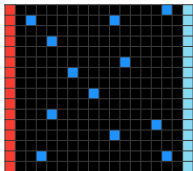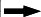

?

Supplement: supplementary_material [file 642248e4_problem.pdf › CompressARC/results_for_the_blog_post/plots_evaluation/642248e4_problem.pdf]

sample

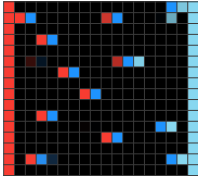

sample average

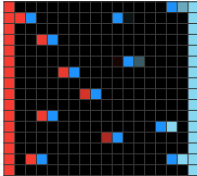

guess 1

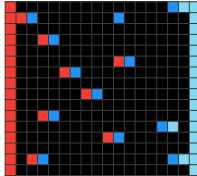

guess 2

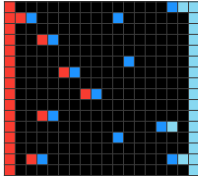

Supplement: supplementary_material [file 642248e4_solutions.pdf › CompressARC/results_for_the_blog_post/plots_evaluation/642248e4_solutions.pdf]

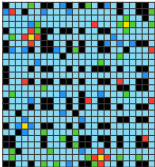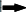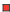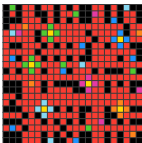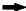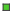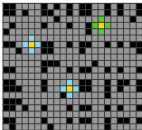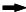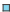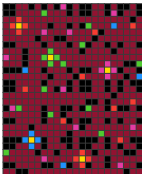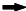

?

Supplement: supplementary_material [file 642d658d_problem.pdf › CompressARC/results_for_the_blog_post/plots_evaluation/642d658d_problem.pdf]

sample

sample average

guess 1

guess 2

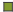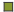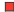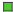

Supplement: supplementary_material [file 642d658d_solutions.pdf › CompressARC/results_for_the_blog_post/plots_evaluation/642d658d_solutions.pdf]

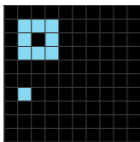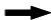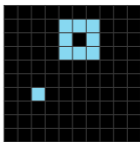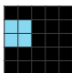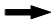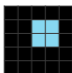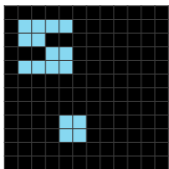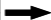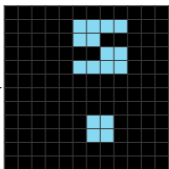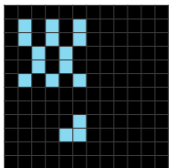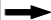

?

Supplement: supplementary_material [file 64a7c07e_problem.pdf › CompressARC/results_for_the_blog_post/plots_evaluation/64a7c07e_problem.pdf]

sample

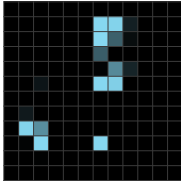

sample average

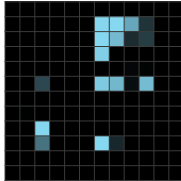

guess 1

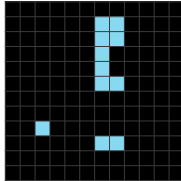

guess 2

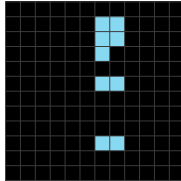

Supplement: supplementary_material [file 64a7c07e_solutions.pdf › CompressARC/results_for_the_blog_post/plots_evaluation/64a7c07e_solutions.pdf]

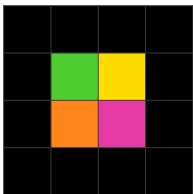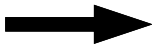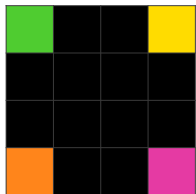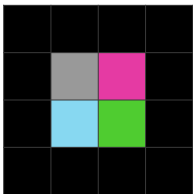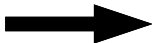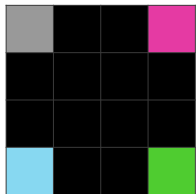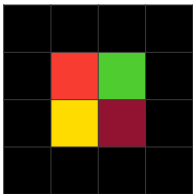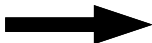

?

Supplement: supplementary_material [file 66e6c45b_problem.pdf › CompressARC/results_for_the_blog_post/plots_evaluation/66e6c45b_problem.pdf]

sample

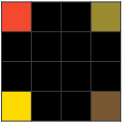

sample average

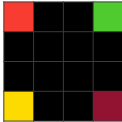

guess 1

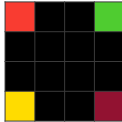

guess 2

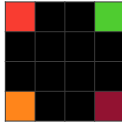

Supplement: supplementary_material [file 66e6c45b_solutions.pdf › CompressARC/results_for_the_blog_post/plots_evaluation/66e6c45b_solutions.pdf]

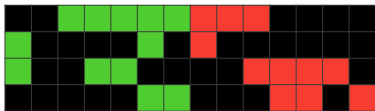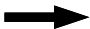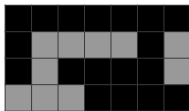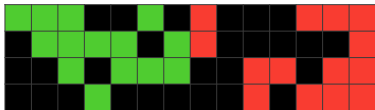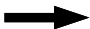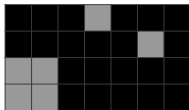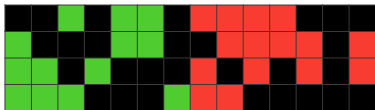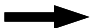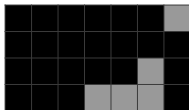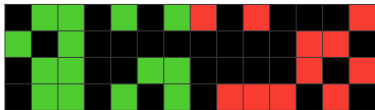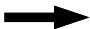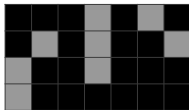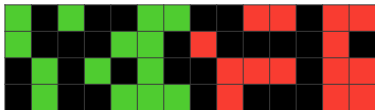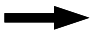

?

Supplement: supplementary_material [file 66f2d22f_problem.pdf › CompressARC/results_for_the_blog_post/plots_evaluation/66f2d22f_problem.pdf]

sample

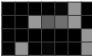

sample average

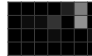

guess 1

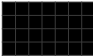

guess 2

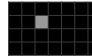

Supplement: supplementary_material [file 66f2d22f_solutions.pdf › CompressARC/results_for_the_blog_post/plots_evaluation/66f2d22f_solutions.pdf]

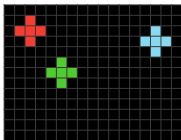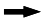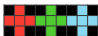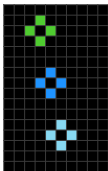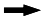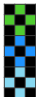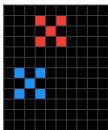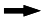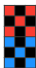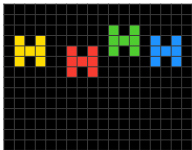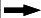

?

Supplement: supplementary_material [file 67636eac_problem.pdf › CompressARC/results_for_the_blog_post/plots_evaluation/67636eac_problem.pdf]

sample

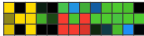

sample average

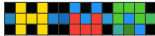

guess 1

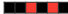

guess 2

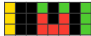

Supplement: supplementary_material [file 67636eac_solutions.pdf › CompressARC/results_for_the_blog_post/plots_evaluation/67636eac_solutions.pdf]

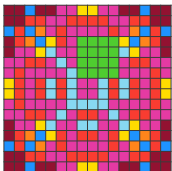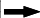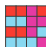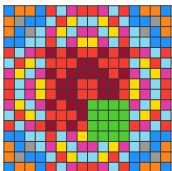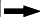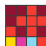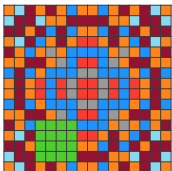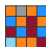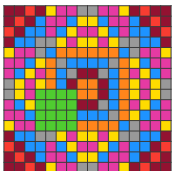

?

Supplement: supplementary_material [file 67b4a34d_problem.pdf › CompressARC/results_for_the_blog_post/plots_evaluation/67b4a34d_problem.pdf]

sample

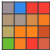

sample average

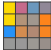

guess 1

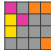

guess 2

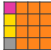

Supplement: supplementary_material [file 67b4a34d_solutions.pdf › CompressARC/results_for_the_blog_post/plots_evaluation/67b4a34d_solutions.pdf]

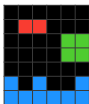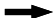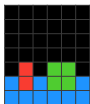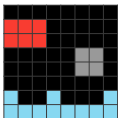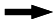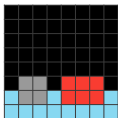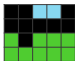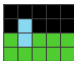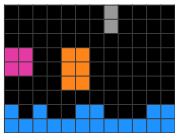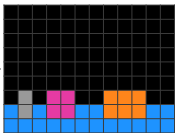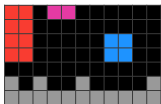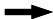

?

Supplement: supplementary_material [file 67c52801_problem.pdf › CompressARC/results_for_the_blog_post/plots_evaluation/67c52801_problem.pdf]

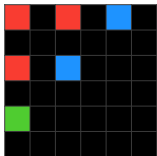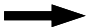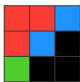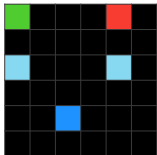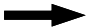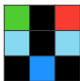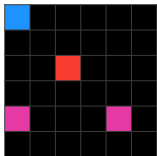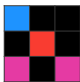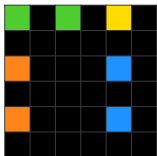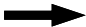

?

Supplement: supplementary_material [file 68b67ca3_problem.pdf › CompressARC/results_for_the_blog_post/plots_evaluation/68b67ca3_problem.pdf]

sample

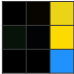

sample average

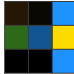

guess 1

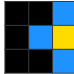

guess 2

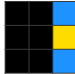

Supplement: supplementary_material [file 68b67ca3_solutions.pdf › CompressARC/results_for_the_blog_post/plots_evaluation/68b67ca3_solutions.pdf]

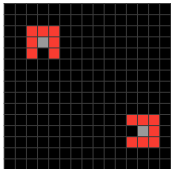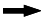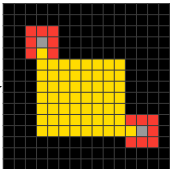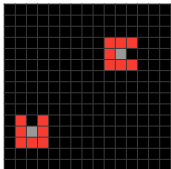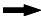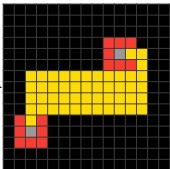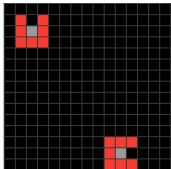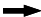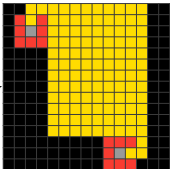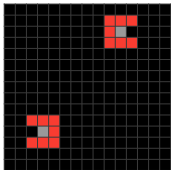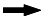

?

Supplement: supplementary_material [file 692cd3b6_problem.pdf › CompressARC/results_for_the_blog_post/plots_evaluation/692cd3b6_problem.pdf]

sample

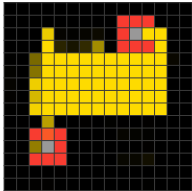

sample average

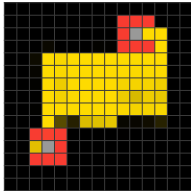

guess 1

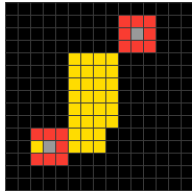

guess 2

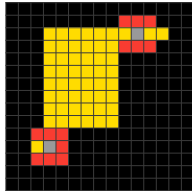

Supplement: supplementary_material [file 692cd3b6_solutions.pdf › CompressARC/results_for_the_blog_post/plots_evaluation/692cd3b6_solutions.pdf]

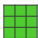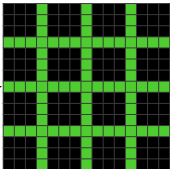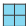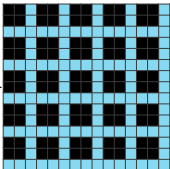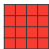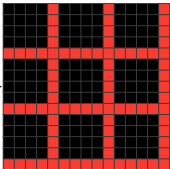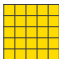

?

Supplement: supplementary_material [file 695367ec_problem.pdf › CompressARC/results_for_the_blog_post/plots_evaluation/695367ec_problem.pdf]

sample

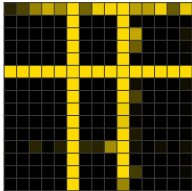

sample average

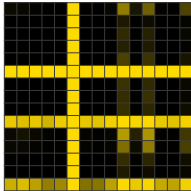

guess 1

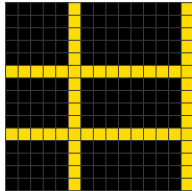

guess 2

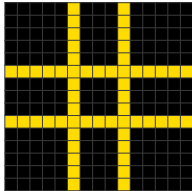

Supplement: supplementary_material [file 695367ec_solutions.pdf › CompressARC/results_for_the_blog_post/plots_evaluation/695367ec_solutions.pdf]

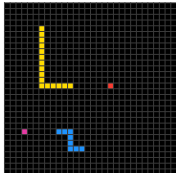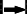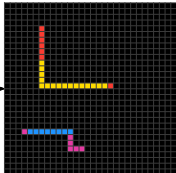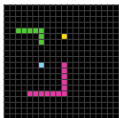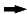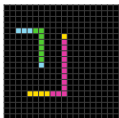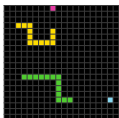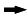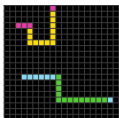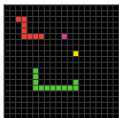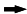

?

Supplement: supplementary_material [file 696d4842_problem.pdf › CompressARC/results_for_the_blog_post/plots_evaluation/696d4842_problem.pdf]

sample

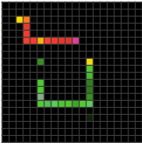

sample average

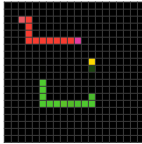

guess 1

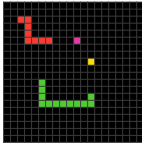

guess 2

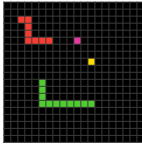

Supplement: supplementary_material [file 696d4842_solutions.pdf › CompressARC/results_for_the_blog_post/plots_evaluation/696d4842_solutions.pdf]

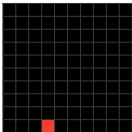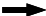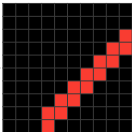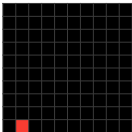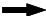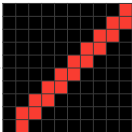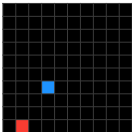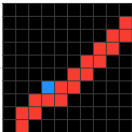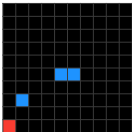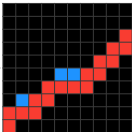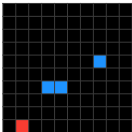

?

Supplement: supplementary_material [file 69889d6e_problem.pdf › CompressARC/results_for_the_blog_post/plots_evaluation/69889d6e_problem.pdf]

sample

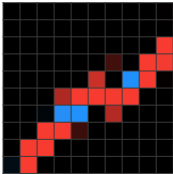

sample average

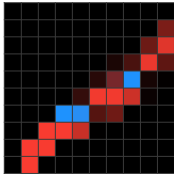

guess 1

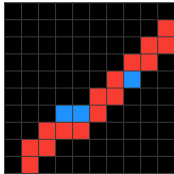

guess 2

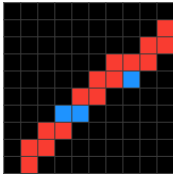

Supplement: supplementary_material [file 69889d6e_solutions.pdf › CompressARC/results_for_the_blog_post/plots_evaluation/69889d6e_solutions.pdf]

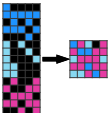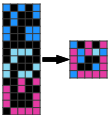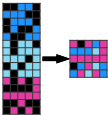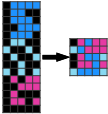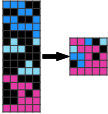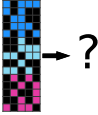

Supplement: supplementary_material [file 6a11f6da_problem.pdf › CompressARC/results_for_the_blog_post/plots_evaluation/6a11f6da_problem.pdf]

sample

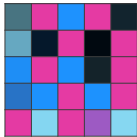

sample average

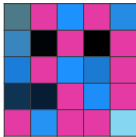

guess 1

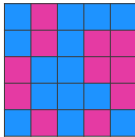

guess 2

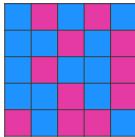

Supplement: supplementary_material [file 6a11f6da_solutions.pdf › CompressARC/results_for_the_blog_post/plots_evaluation/6a11f6da_solutions.pdf]

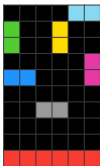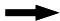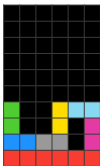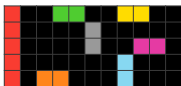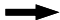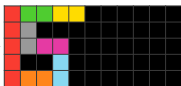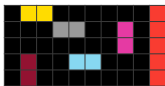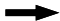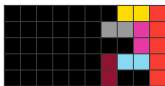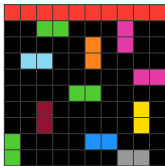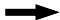

?

Supplement: supplementary_material [file 6ad5bdfd_problem.pdf › CompressARC/results_for_the_blog_post/plots_evaluation/6ad5bdfd_problem.pdf]

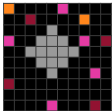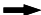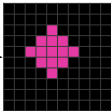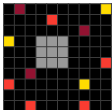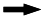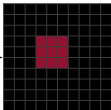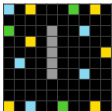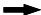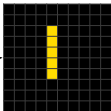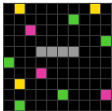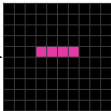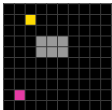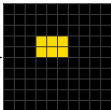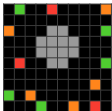

?

Supplement: supplementary_material [file 6df30ad6_problem.pdf › CompressARC/results_for_the_blog_post/plots_evaluation/6df30ad6_problem.pdf]

sample

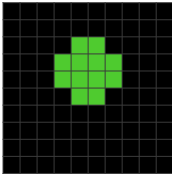

sample average

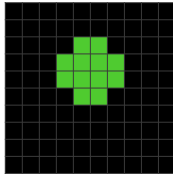

guess 1

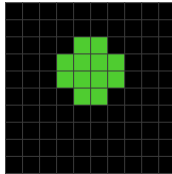

guess 2

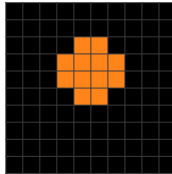

Supplement: supplementary_material [file 6df30ad6_solutions.pdf › CompressARC/results_for_the_blog_post/plots_evaluation/6df30ad6_solutions.pdf]

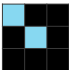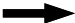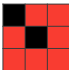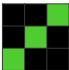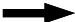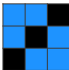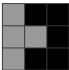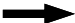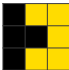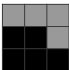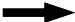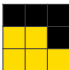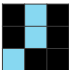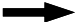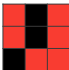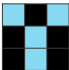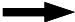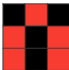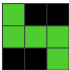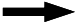

?

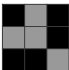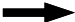

?

Supplement: supplementary_material [file 6ea4a07e_problem.pdf › CompressARC/results_for_the_blog_post/plots_evaluation/6ea4a07e_problem.pdf]

sample

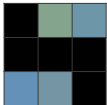

sample average

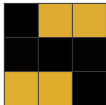

guess 1

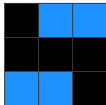

guess 2

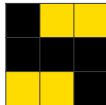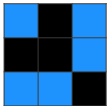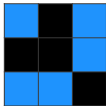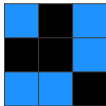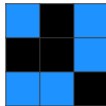

Supplement: supplementary_material [file 6ea4a07e_solutions.pdf › CompressARC/results_for_the_blog_post/plots_evaluation/6ea4a07e_solutions.pdf]

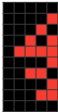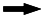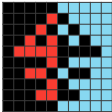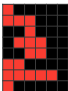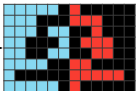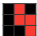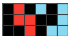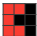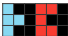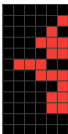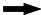

?

Supplement: supplementary_material [file 6f473927_problem.pdf › CompressARC/results_for_the_blog_post/plots_evaluation/6f473927_problem.pdf]

sample

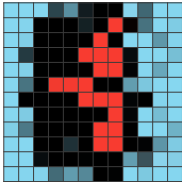

sample average

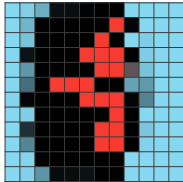

guess 1

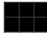

guess 2

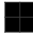

Supplement: supplementary_material [file 6f473927_solutions.pdf › CompressARC/results_for_the_blog_post/plots_evaluation/6f473927_solutions.pdf]

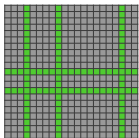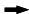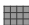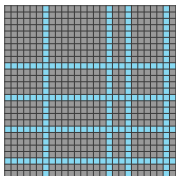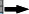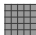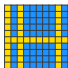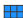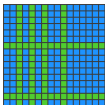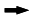

?

Supplement: supplementary_material [file 7039b2d7_problem.pdf › CompressARC/results_for_the_blog_post/plots_evaluation/7039b2d7_problem.pdf]

sample

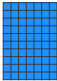

sample average

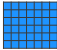

guess 1

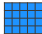

guess 2

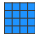

Supplement: supplementary_material [file 7039b2d7_solutions.pdf › CompressARC/results_for_the_blog_post/plots_evaluation/7039b2d7_solutions.pdf]

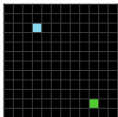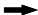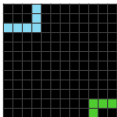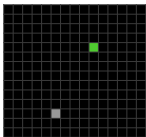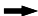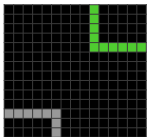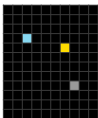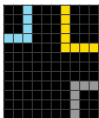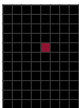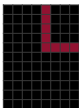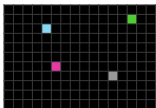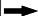

?

Supplement: supplementary_material [file 705a3229_problem.pdf › CompressARC/results_for_the_blog_post/plots_evaluation/705a3229_problem.pdf]

sample

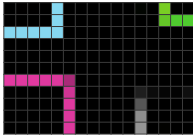

sample average

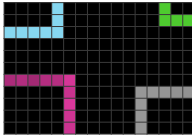

guess 1

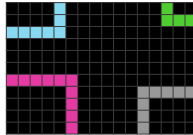

guess 2

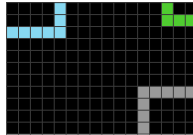

Supplement: supplementary_material [file 705a3229_solutions.pdf › CompressARC/results_for_the_blog_post/plots_evaluation/705a3229_solutions.pdf]

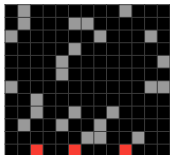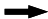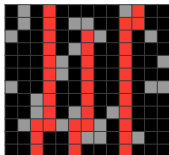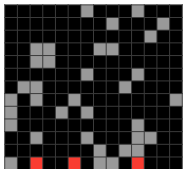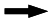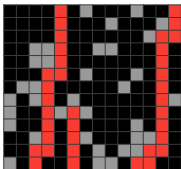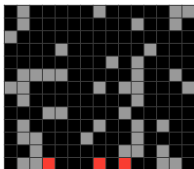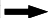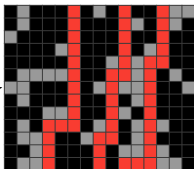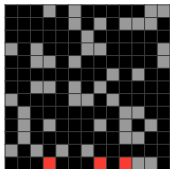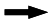

?

Supplement: supplementary_material [file 712bf12e_problem.pdf › CompressARC/results_for_the_blog_post/plots_evaluation/712bf12e_problem.pdf]

sample

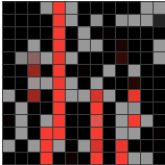

sample average

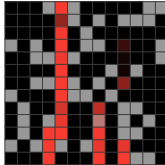

guess 1

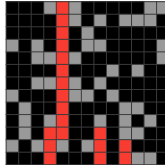

guess 2

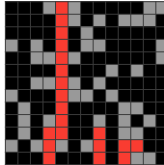

Supplement: supplementary_material [file 712bf12e_solutions.pdf › CompressARC/results_for_the_blog_post/plots_evaluation/712bf12e_solutions.pdf]

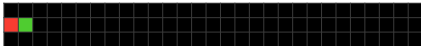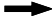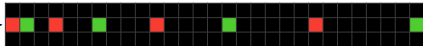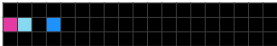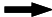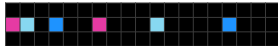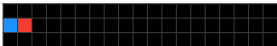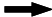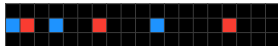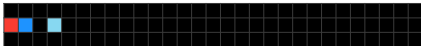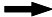

?

Supplement: supplementary_material [file 72207abc_problem.pdf › CompressARC/results_for_the_blog_post/plots_evaluation/72207abc_problem.pdf]

sample

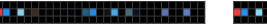

sample average

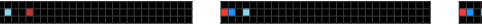

guess 1

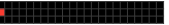

guess 2

Supplement: supplementary_material [file 72207abc_solutions.pdf › CompressARC/results_for_the_blog_post/plots_evaluation/72207abc_solutions.pdf]

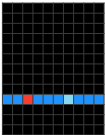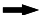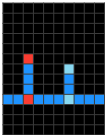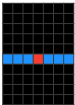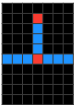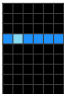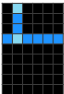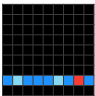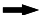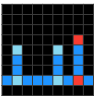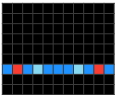

?

Supplement: supplementary_material [file 72a961c9_problem.pdf › CompressARC/results_for_the_blog_post/plots_evaluation/72a961c9_problem.pdf]

sample

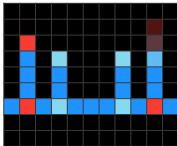

sample average

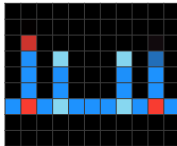

guess 1

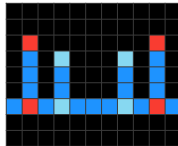

guess 2

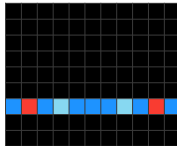

Supplement: supplementary_material [file 72a961c9_solutions.pdf › CompressARC/results_for_the_blog_post/plots_evaluation/72a961c9_solutions.pdf]

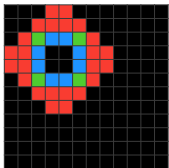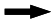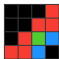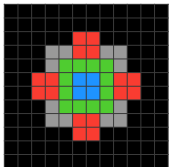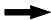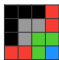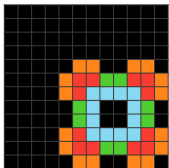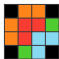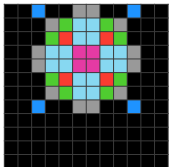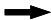

?

Supplement: supplementary_material [file 73182012_problem.pdf › CompressARC/results_for_the_blog_post/plots_evaluation/73182012_problem.pdf]

sample

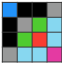

sample average

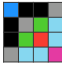

guess 1

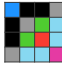

guess 2

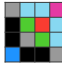

Supplement: supplementary_material [file 73182012_solutions.pdf › CompressARC/results_for_the_blog_post/plots_evaluation/73182012_solutions.pdf]

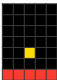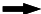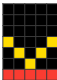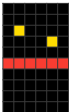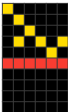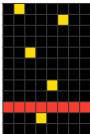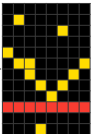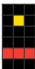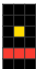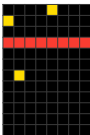

?

Supplement: supplementary_material [file 73c3b0d8_problem.pdf › CompressARC/results_for_the_blog_post/plots_evaluation/73c3b0d8_problem.pdf]

sample

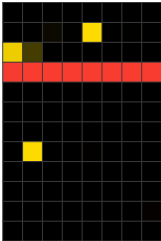

sample average

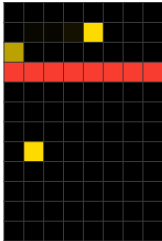

guess 1

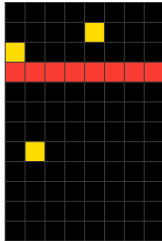

guess 2

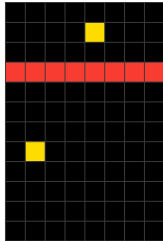

Supplement: supplementary_material [file 73c3b0d8_solutions.pdf › CompressARC/results_for_the_blog_post/plots_evaluation/73c3b0d8_solutions.pdf]

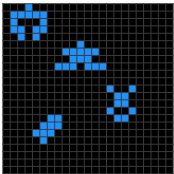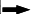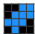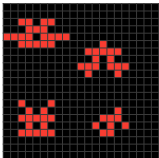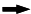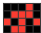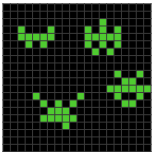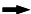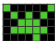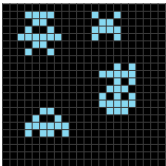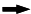

?

Supplement: supplementary_material [file 73ccf9c2_problem.pdf › CompressARC/results_for_the_blog_post/plots_evaluation/73ccf9c2_problem.pdf]

sample

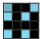

sample average

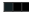

guess 1

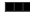

guess 2

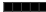

Supplement: supplementary_material [file 73ccf9c2_solutions.pdf › CompressARC/results_for_the_blog_post/plots_evaluation/73ccf9c2_solutions.pdf]

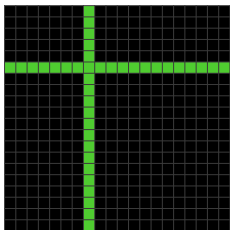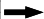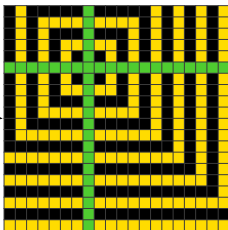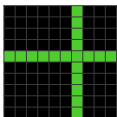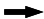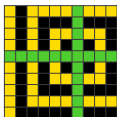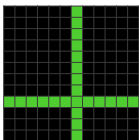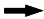

?

Supplement: supplementary_material [file 759f3fd3_problem.pdf › CompressARC/results_for_the_blog_post/plots_evaluation/759f3fd3_problem.pdf]

sample

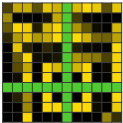

sample average

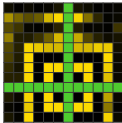

guess 1

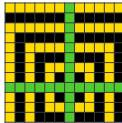

guess 2

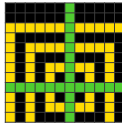

Supplement: supplementary_material [file 759f3fd3_solutions.pdf › CompressARC/results_for_the_blog_post/plots_evaluation/759f3fd3_solutions.pdf]

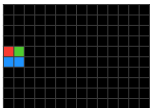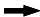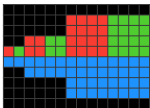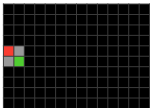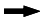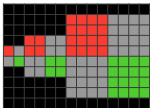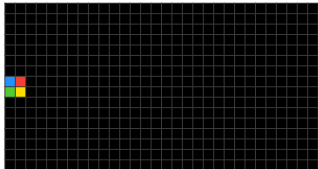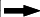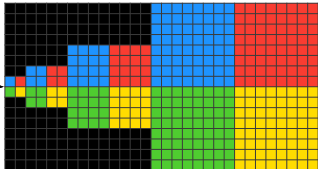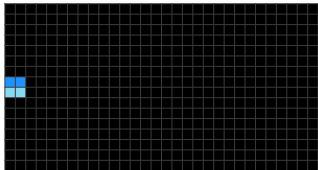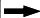

?

Supplement: supplementary_material [file 762cd429_problem.pdf › CompressARC/results_for_the_blog_post/plots_evaluation/762cd429_problem.pdf]

sample

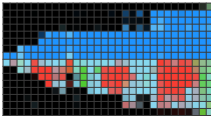

sample average

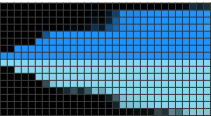

guess 1

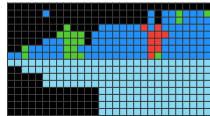

guess 2

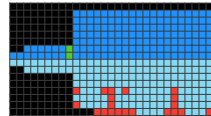

Supplement: supplementary_material [file 762cd429_solutions.pdf › CompressARC/results_for_the_blog_post/plots_evaluation/762cd429_solutions.pdf]

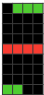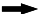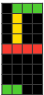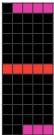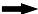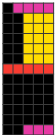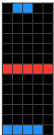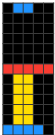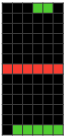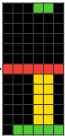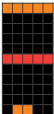

?

Supplement: supplementary_material [file 770cc55f_problem.pdf › CompressARC/results_for_the_blog_post/plots_evaluation/770cc55f_problem.pdf]

sample

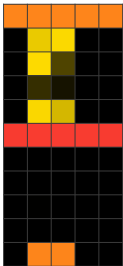

sample average

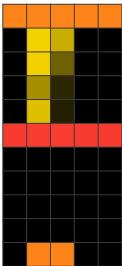

guess 1

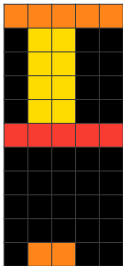

guess 2

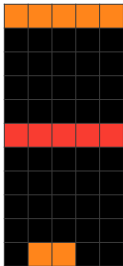

Supplement: supplementary_material [file 770cc55f_solutions.pdf › CompressARC/results_for_the_blog_post/plots_evaluation/770cc55f_solutions.pdf]

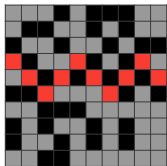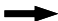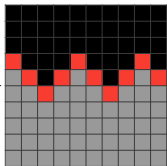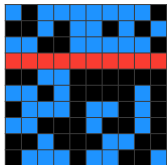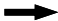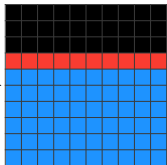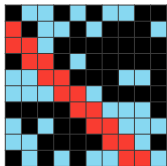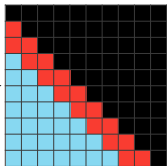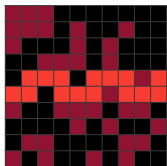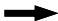

?

Supplement: supplementary_material [file 782b5218_problem.pdf › CompressARC/results_for_the_blog_post/plots_evaluation/782b5218_problem.pdf]

sample

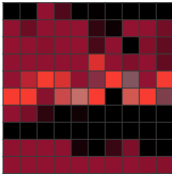

sample average

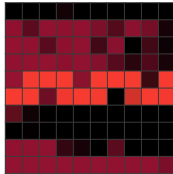

guess 1

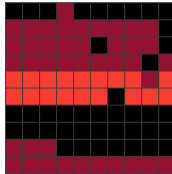

guess 2

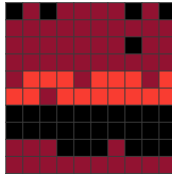

Supplement: supplementary_material [file 782b5218_solutions.pdf › CompressARC/results_for_the_blog_post/plots_evaluation/782b5218_solutions.pdf]

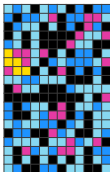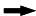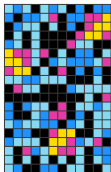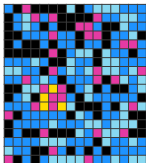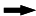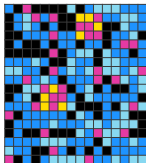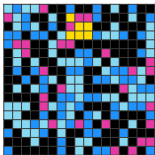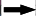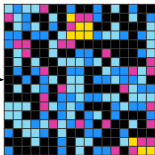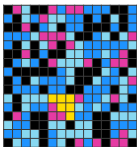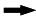

?

Supplement: supplementary_material [file 79369cc6_problem.pdf › CompressARC/results_for_the_blog_post/plots_evaluation/79369cc6_problem.pdf]

sample

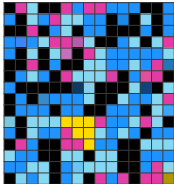

sample average

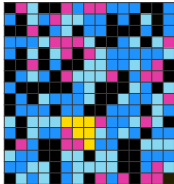

guess 1

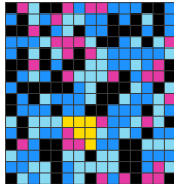

guess 2

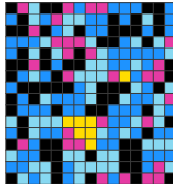

Supplement: supplementary_material [file 79369cc6_solutions.pdf › CompressARC/results_for_the_blog_post/plots_evaluation/79369cc6_solutions.pdf]

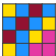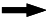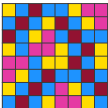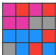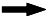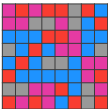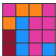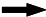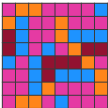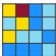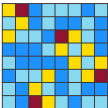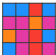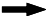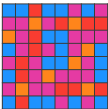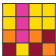

?

Supplement: supplementary_material [file 7953d61e_problem.pdf › CompressARC/results_for_the_blog_post/plots_evaluation/7953d61e_problem.pdf]

sample

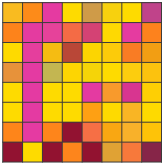

sample average

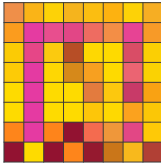

guess 1

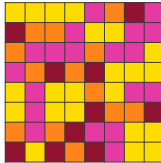

guess 2

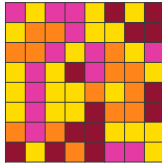

Supplement: supplementary_material [file 7953d61e_solutions.pdf › CompressARC/results_for_the_blog_post/plots_evaluation/7953d61e_solutions.pdf]

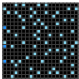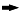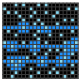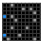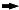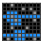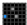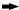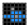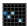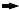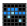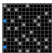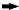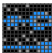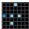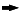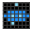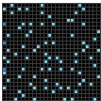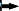

?

Supplement: supplementary_material [file 79fb03f4_problem.pdf › CompressARC/results_for_the_blog_post/plots_evaluation/79fb03f4_problem.pdf]

sample

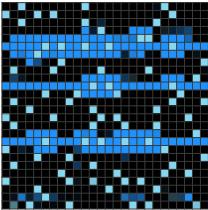

sample average

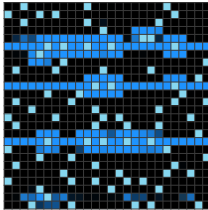

guess 1

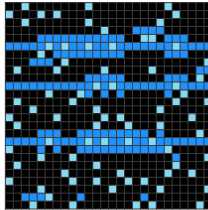

guess 2

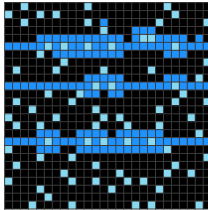

Supplement: supplementary_material [file 79fb03f4_solutions.pdf › CompressARC/results_for_the_blog_post/plots_evaluation/79fb03f4_solutions.pdf]

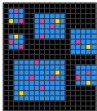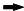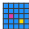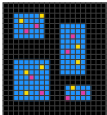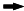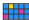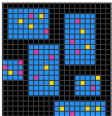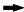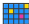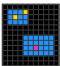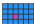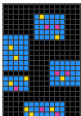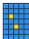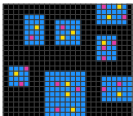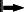

?

Supplement: supplementary_material [file 7bb29440_problem.pdf › CompressARC/results_for_the_blog_post/plots_evaluation/7bb29440_problem.pdf]

sample

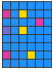

sample average

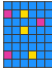

guess 1

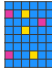

guess 2

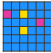

Supplement: supplementary_material [file 7bb29440_solutions.pdf › CompressARC/results_for_the_blog_post/plots_evaluation/7bb29440_solutions.pdf]

sample

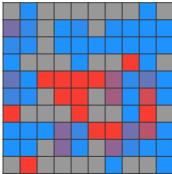

sample average

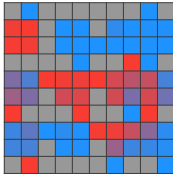

guess 1

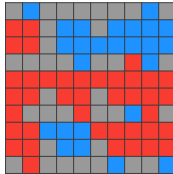

guess 2

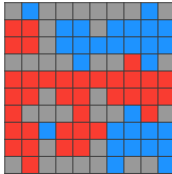

Supplement: supplementary_material [file 7c8af763_solutions.pdf › CompressARC/results_for_the_blog_post/plots_evaluation/7c8af763_solutions.pdf]

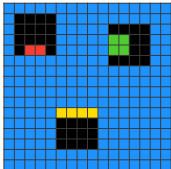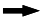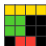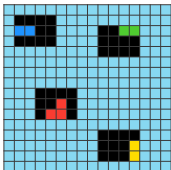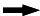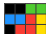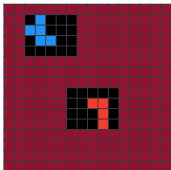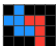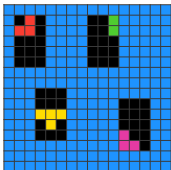

?

Supplement: supplementary_material [file 7c9b52a0_problem.pdf › CompressARC/results_for_the_blog_post/plots_evaluation/7c9b52a0_problem.pdf]

sample

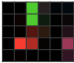

sample average

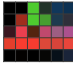

guess 1

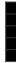

guess 2

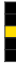

Supplement: supplementary_material [file 7c9b52a0_solutions.pdf › CompressARC/results_for_the_blog_post/plots_evaluation/7c9b52a0_solutions.pdf]

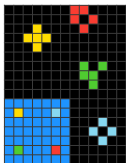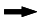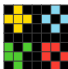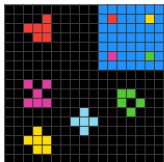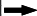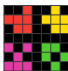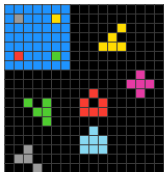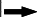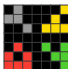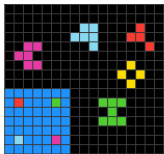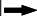

?

Supplement: supplementary_material [file 7d18a6fb_problem.pdf › CompressARC/results_for_the_blog_post/plots_evaluation/7d18a6fb_problem.pdf]

sample

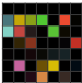

sample average

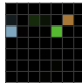

guess 1

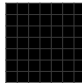

guess 2

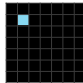

Supplement: supplementary_material [file 7d18a6fb_solutions.pdf › CompressARC/results_for_the_blog_post/plots_evaluation/7d18a6fb_solutions.pdf]

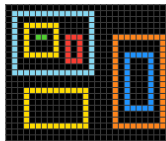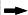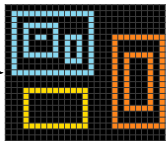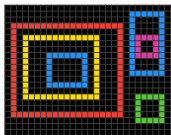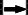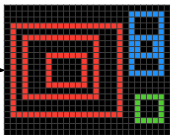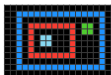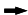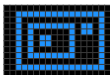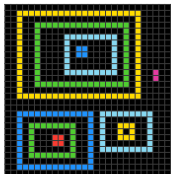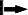

?

Supplement: supplementary_material [file 7d1f7ee8_problem.pdf › CompressARC/results_for_the_blog_post/plots_evaluation/7d1f7ee8_problem.pdf]

sample

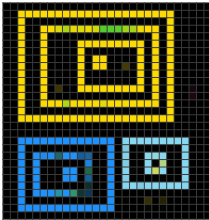

sample average

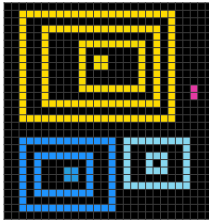

guess 1

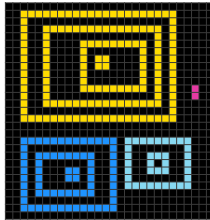

guess 2

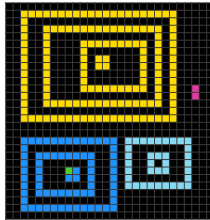

Supplement: supplementary_material [file 7d1f7ee8_solutions.pdf › CompressARC/results_for_the_blog_post/plots_evaluation/7d1f7ee8_solutions.pdf]

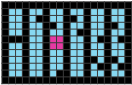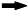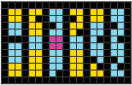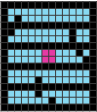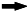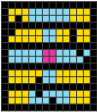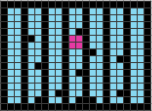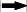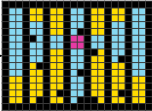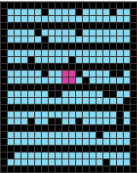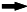

?

Supplement: supplementary_material [file 7d419a02_problem.pdf › CompressARC/results_for_the_blog_post/plots_evaluation/7d419a02_problem.pdf]

sample

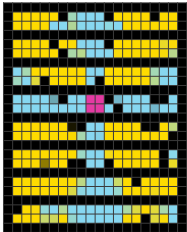

sample average

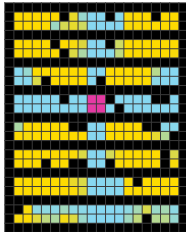

guess 1

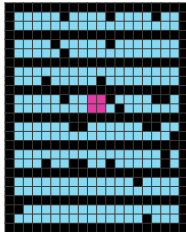

guess 2

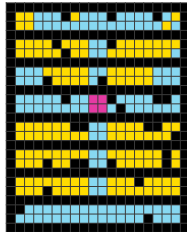

Supplement: supplementary_material [file 7d419a02_solutions.pdf › CompressARC/results_for_the_blog_post/plots_evaluation/7d419a02_solutions.pdf]

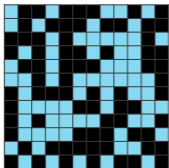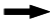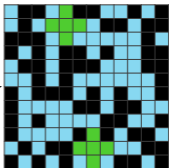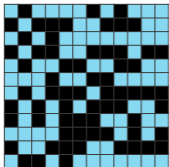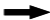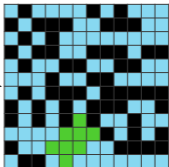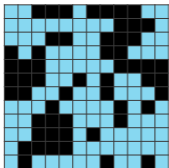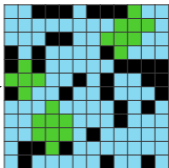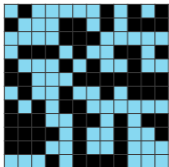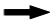

?

Supplement: supplementary_material [file 7e02026e_problem.pdf › CompressARC/results_for_the_blog_post/plots_evaluation/7e02026e_problem.pdf]
