# Supplementary material (part 2 of 17)
Source: ML conference proceedings conference paper supplement (https://openreview.net/forum?id=jLC662Yo5h)

sample

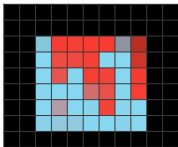

sample average

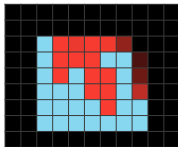

guess 1

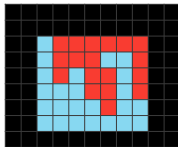

guess 2

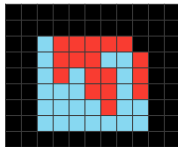

Supplement: supplementary_material [file 6d75e8bb_at_1500 steps.pdf › CompressARC/results_for_the_blog_post/6d75e8bb/6d75e8bb_at_1500 steps.pdf]

sample

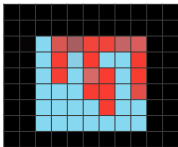

sample average

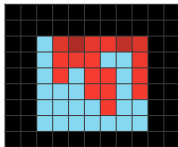

guess 1



guess 2

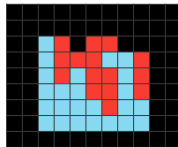

Supplement: supplementary_material [file 6d75e8bb_at_200 steps.pdf › CompressARC/results_for_the_blog_post/6d75e8bb/6d75e8bb_at_200 steps.pdf]

sample

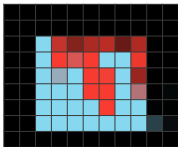

sample average

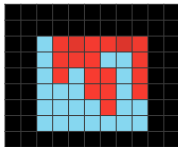

guess 1



guess 2

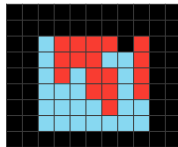

Supplement: supplementary_material [file 6d75e8bb_at_250 steps.pdf › CompressARC/results_for_the_blog_post/6d75e8bb/6d75e8bb_at_250 steps.pdf]

sample

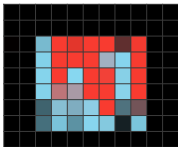

sample average

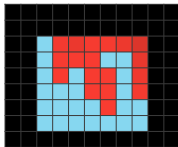

guess 1



guess 2

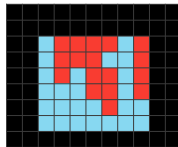

Supplement: supplementary_material [file 6d75e8bb_at_300 steps.pdf › CompressARC/results_for_the_blog_post/6d75e8bb/6d75e8bb_at_300 steps.pdf]

sample

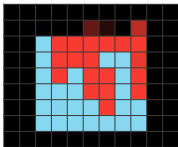

sample average

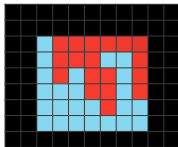

guess 1



guess 2



Supplement: supplementary_material [file 6d75e8bb_at_350 steps.pdf › CompressARC/results_for_the_blog_post/6d75e8bb/6d75e8bb_at_350 steps.pdf]

sample

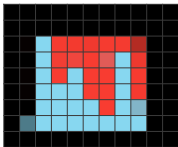

sample average

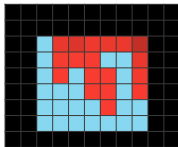

guess 1



guess 2

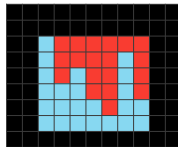

Supplement: supplementary_material [file 6d75e8bb_at_400 steps.pdf › CompressARC/results_for_the_blog_post/6d75e8bb/6d75e8bb_at_400 steps.pdf]

sample

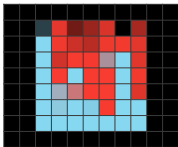

sample average

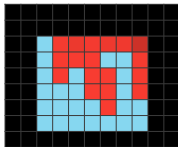

guess 1



guess 2

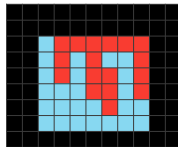

Supplement: supplementary_material [file 6d75e8bb_at_450 steps.pdf › CompressARC/results_for_the_blog_post/6d75e8bb/6d75e8bb_at_450 steps.pdf]

sample

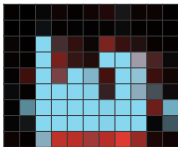

sample average

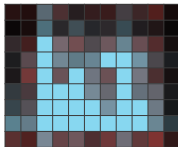

guess 1

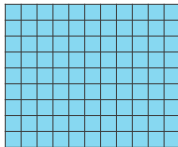

guess 2

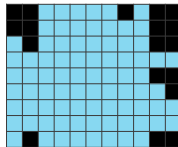

Supplement: supplementary_material [file 6d75e8bb_at_50 steps.pdf › CompressARC/results_for_the_blog_post/6d75e8bb/6d75e8bb_at_50 steps.pdf]

sample

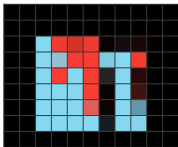

sample average

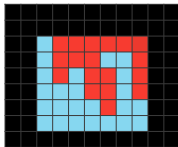

guess 1



guess 2



Supplement: supplementary_material [file 6d75e8bb_at_500 steps.pdf › CompressARC/results_for_the_blog_post/6d75e8bb/6d75e8bb_at_500 steps.pdf]

sample

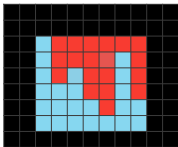

sample average

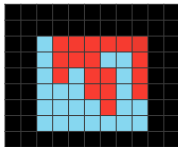

guess 1



guess 2

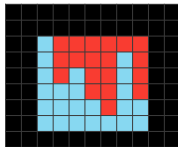

Supplement: supplementary_material [file 6d75e8bb_at_550 steps.pdf › CompressARC/results_for_the_blog_post/6d75e8bb/6d75e8bb_at_550 steps.pdf]

sample

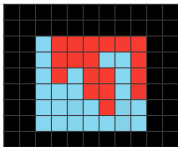

sample average

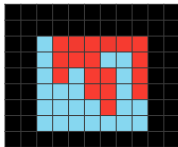

guess 1



guess 2



Supplement: supplementary_material [file 6d75e8bb_at_600 steps.pdf › CompressARC/results_for_the_blog_post/6d75e8bb/6d75e8bb_at_600 steps.pdf]

sample

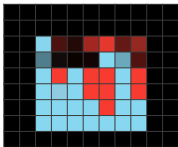

sample average

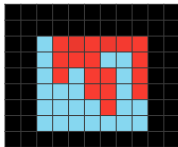

guess 1



guess 2



Supplement: supplementary_material [file 6d75e8bb_at_650 steps.pdf › CompressARC/results_for_the_blog_post/6d75e8bb/6d75e8bb_at_650 steps.pdf]

sample

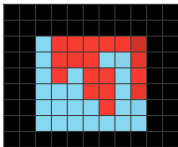

sample average

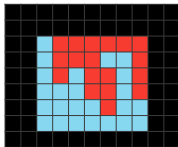

guess 1



guess 2



Supplement: supplementary_material [file 6d75e8bb_at_700 steps.pdf › CompressARC/results_for_the_blog_post/6d75e8bb/6d75e8bb_at_700 steps.pdf]

sample

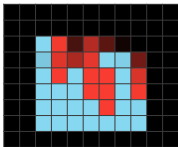

sample average

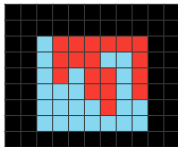

guess 1



guess 2



Supplement: supplementary_material [file 6d75e8bb_at_750 steps.pdf › CompressARC/results_for_the_blog_post/6d75e8bb/6d75e8bb_at_750 steps.pdf]

sample

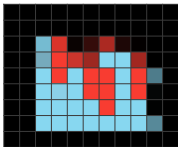

sample average

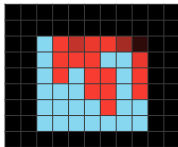

guess 1



guess 2

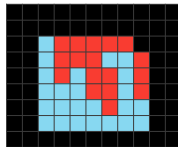

Supplement: supplementary_material [file 6d75e8bb_at_800 steps.pdf › CompressARC/results_for_the_blog_post/6d75e8bb/6d75e8bb_at_800 steps.pdf]

sample

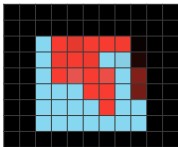

sample average

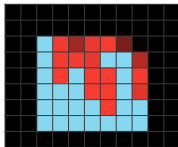

guess 1



guess 2



Supplement: supplementary_material [file 6d75e8bb_at_850 steps.pdf › CompressARC/results_for_the_blog_post/6d75e8bb/6d75e8bb_at_850 steps.pdf]

sample

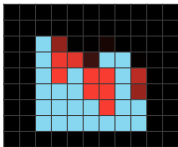

sample average

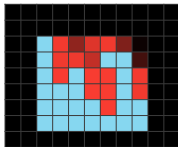

guess 1



guess 2



Supplement: supplementary_material [file 6d75e8bb_at_900 steps.pdf › CompressARC/results_for_the_blog_post/6d75e8bb/6d75e8bb_at_900 steps.pdf]

sample

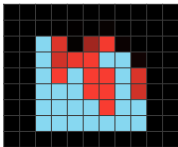

sample average

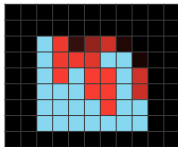

guess 1



guess 2



Supplement: supplementary_material [file 6d75e8bb_at_950 steps.pdf › CompressARC/results_for_the_blog_post/6d75e8bb/6d75e8bb_at_950 steps.pdf]

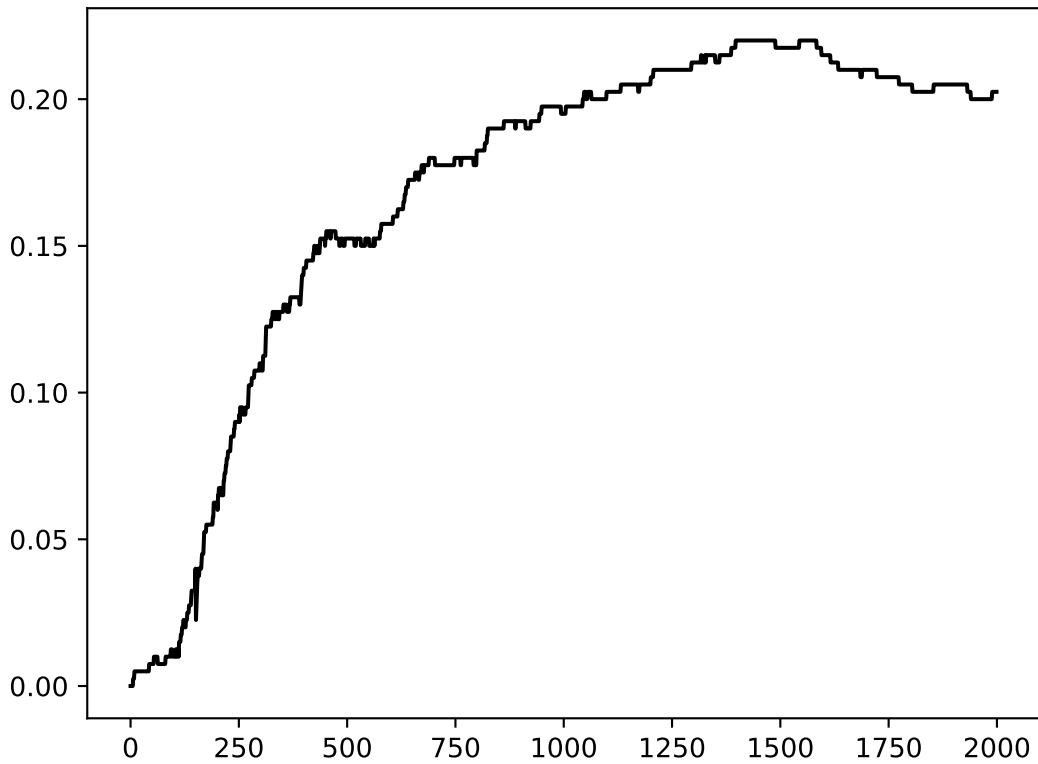

Supplement: supplementary_material [file accuracy_curve_evaluation.pdf › CompressARC/results_for_the_blog_post/accuracy_curve_evaluation.pdf]

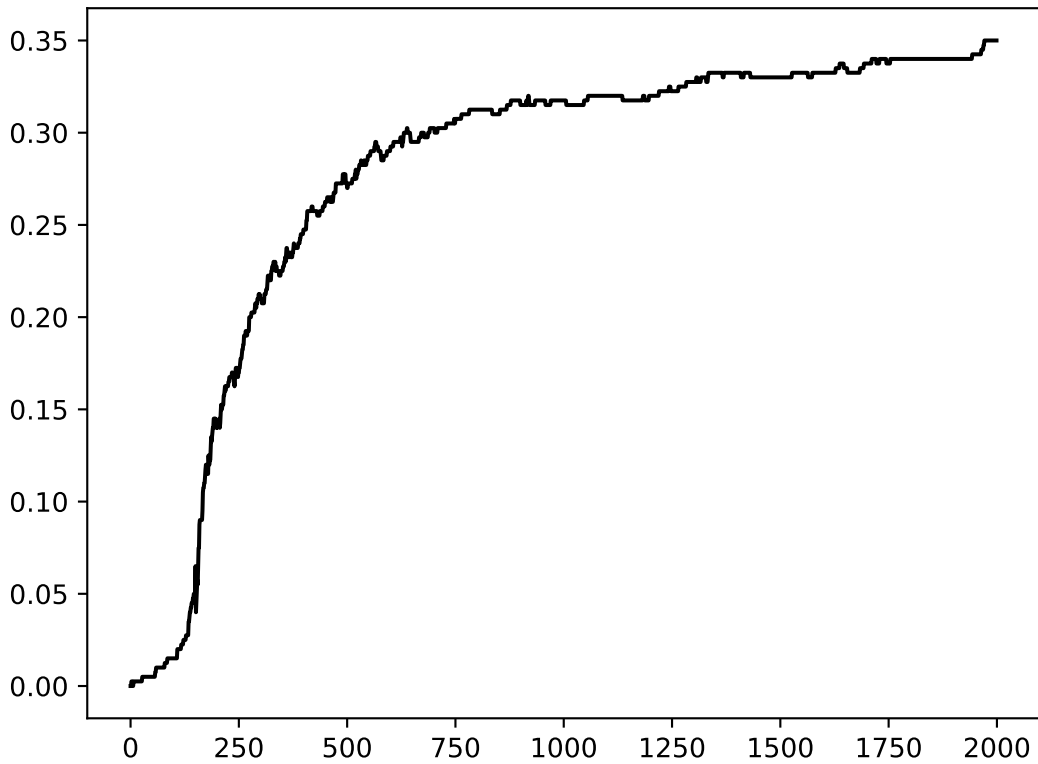

Supplement: supplementary_material [file accuracy_curve_training.pdf › CompressARC/results_for_the_blog_post/accuracy_curve_training.pdf]

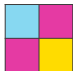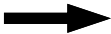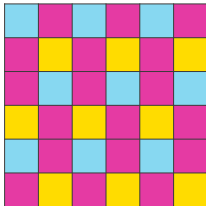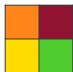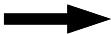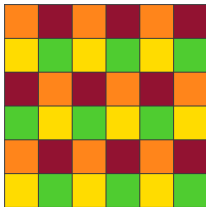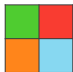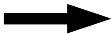

?

Supplement: supplementary_material [file 00576224_problem.pdf › CompressARC/results_for_the_blog_post/plots_evaluation/00576224_problem.pdf]

sample

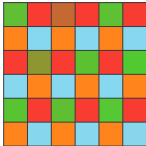

sample average

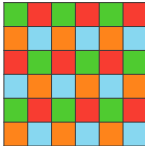

guess 1

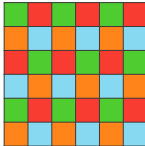

guess 2

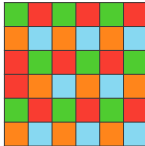

Supplement: supplementary_material [file 00576224_solutions.pdf › CompressARC/results_for_the_blog_post/plots_evaluation/00576224_solutions.pdf]

sample

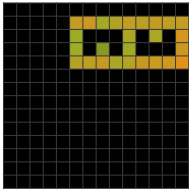

sample average

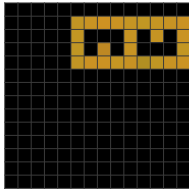

guess 1

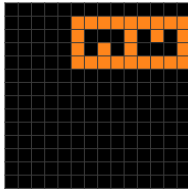

guess 2

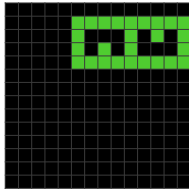

Supplement: supplementary_material [file 009d5c81_solutions.pdf › CompressARC/results_for_the_blog_post/plots_evaluation/009d5c81_solutions.pdf]

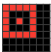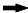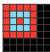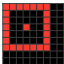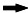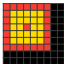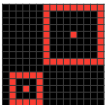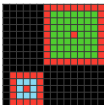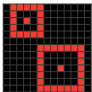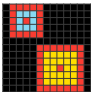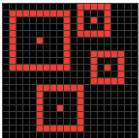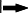

?

Supplement: supplementary_material [file 00dbd492_problem.pdf › CompressARC/results_for_the_blog_post/plots_evaluation/00dbd492_problem.pdf]

sample

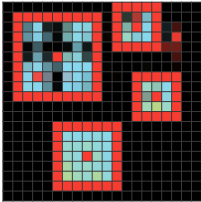

sample average

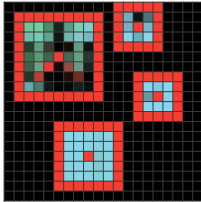

guess 1

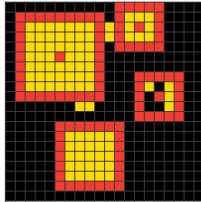

guess 2

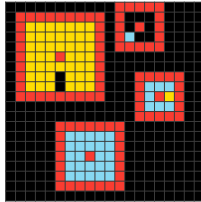

Supplement: supplementary_material [file 00dbd492_solutions.pdf › CompressARC/results_for_the_blog_post/plots_evaluation/00dbd492_solutions.pdf]

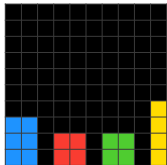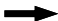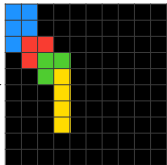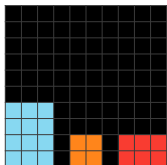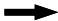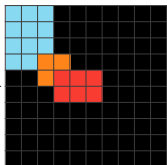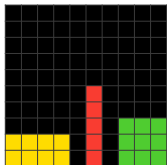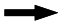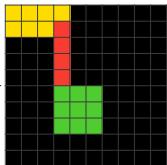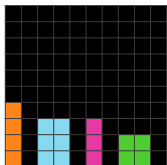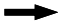

?

Supplement: supplementary_material [file 03560426_problem.pdf › CompressARC/results_for_the_blog_post/plots_evaluation/03560426_problem.pdf]

sample

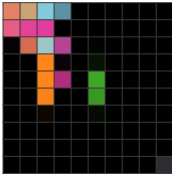

sample average

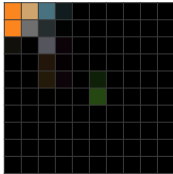

guess 1

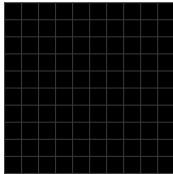

guess 2

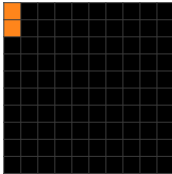

Supplement: supplementary_material [file 03560426_solutions.pdf › CompressARC/results_for_the_blog_post/plots_evaluation/03560426_solutions.pdf]

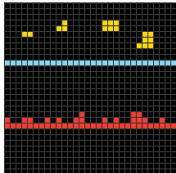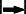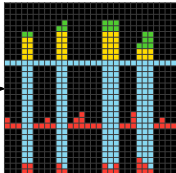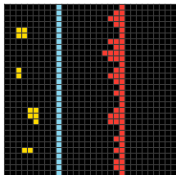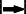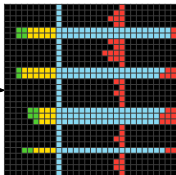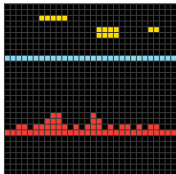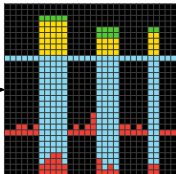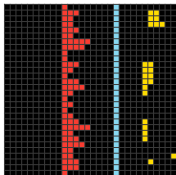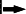

?

Supplement: supplementary_material [file 05a7bcf2_problem.pdf › CompressARC/results_for_the_blog_post/plots_evaluation/05a7bcf2_problem.pdf]

sample

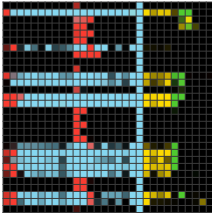

sample average

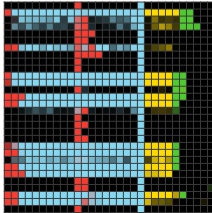

guess 1

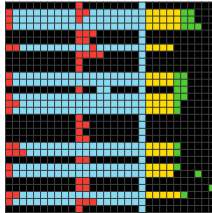

guess 2

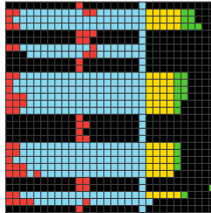

Supplement: supplementary_material [file 05a7bcf2_solutions.pdf › CompressARC/results_for_the_blog_post/plots_evaluation/05a7bcf2_solutions.pdf]

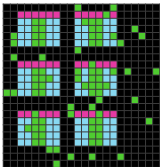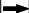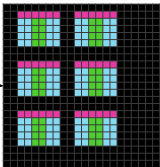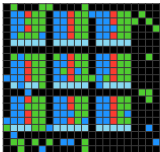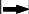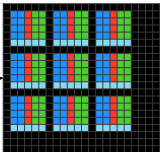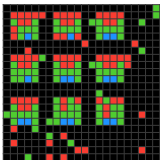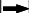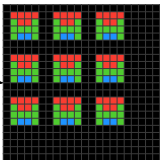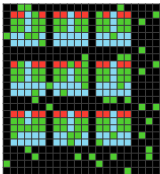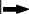

?

Supplement: supplementary_material [file 0607ce86_problem.pdf › CompressARC/results_for_the_blog_post/plots_evaluation/0607ce86_problem.pdf]

sample

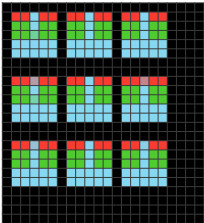

sample average

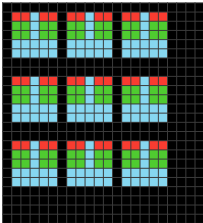

guess 1

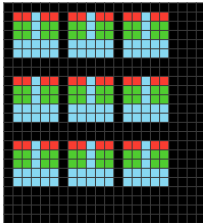

guess 2

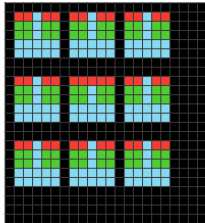

Supplement: supplementary_material [file 0607ce86_solutions.pdf › CompressARC/results_for_the_blog_post/plots_evaluation/0607ce86_solutions.pdf]

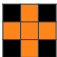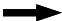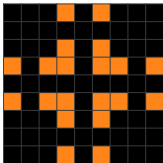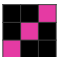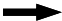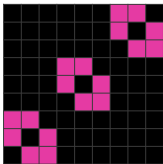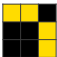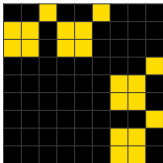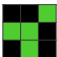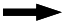

?

Supplement: supplementary_material [file 0692e18c_problem.pdf › CompressARC/results_for_the_blog_post/plots_evaluation/0692e18c_problem.pdf]

sample

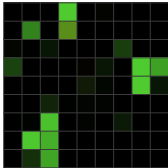

sample average

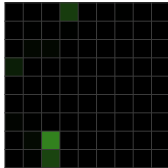

guess 1

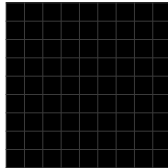

guess 2

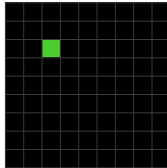

Supplement: supplementary_material [file 0692e18c_solutions.pdf › CompressARC/results_for_the_blog_post/plots_evaluation/0692e18c_solutions.pdf]

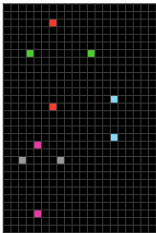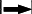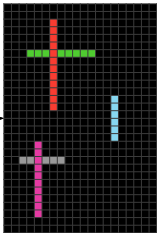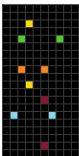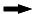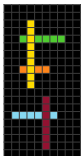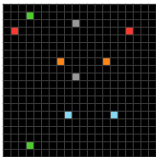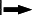

?

Supplement: supplementary_material [file 070dd51e_problem.pdf › CompressARC/results_for_the_blog_post/plots_evaluation/070dd51e_problem.pdf]

sample

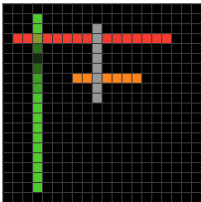

sample average

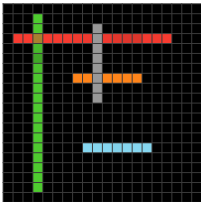

guess 1

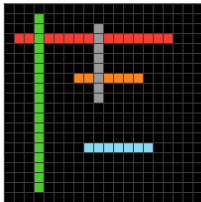

guess 2

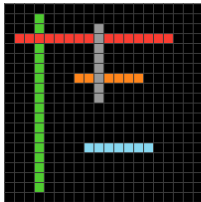

Supplement: supplementary_material [file 070dd51e_solutions.pdf › CompressARC/results_for_the_blog_post/plots_evaluation/070dd51e_solutions.pdf]

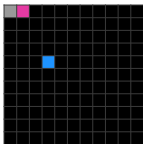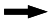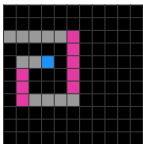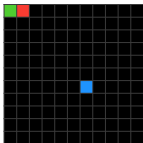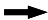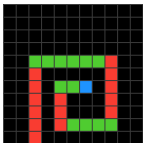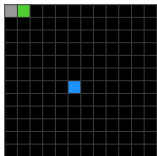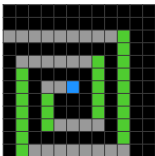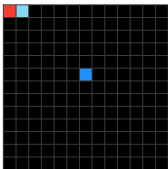

?

Supplement: supplementary_material [file 08573cc6_problem.pdf › CompressARC/results_for_the_blog_post/plots_evaluation/08573cc6_problem.pdf]

sample

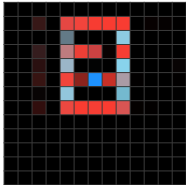

sample average

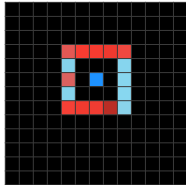

guess 1

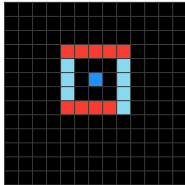

guess 2

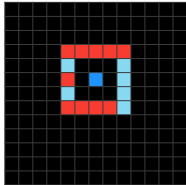

Supplement: supplementary_material [file 08573cc6_solutions.pdf › CompressARC/results_for_the_blog_post/plots_evaluation/08573cc6_solutions.pdf]

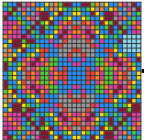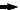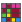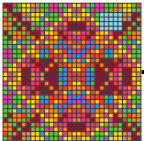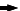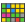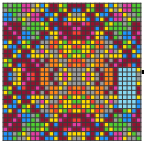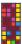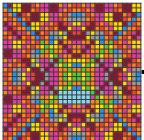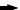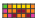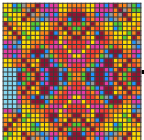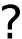

Supplement: supplementary_material [file 0934a4d8_problem.pdf › CompressARC/results_for_the_blog_post/plots_evaluation/0934a4d8_problem.pdf]

sample

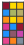

sample average

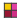

guess 1

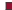

guess 2

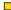

Supplement: supplementary_material [file 0934a4d8_solutions.pdf › CompressARC/results_for_the_blog_post/plots_evaluation/0934a4d8_solutions.pdf]

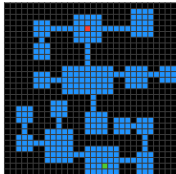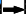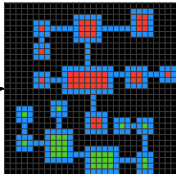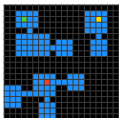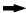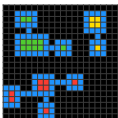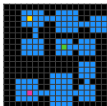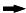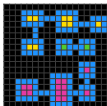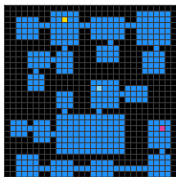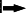

?

Supplement: supplementary_material [file 09c534e7_problem.pdf › CompressARC/results_for_the_blog_post/plots_evaluation/09c534e7_problem.pdf]

sample

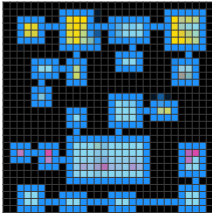

sample average

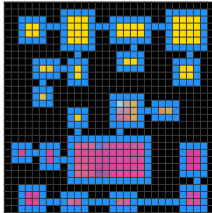

guess 1

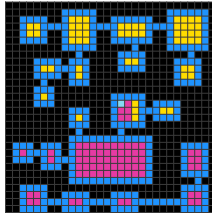

guess 2

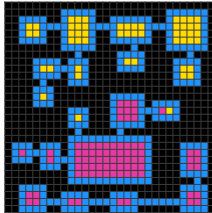

Supplement: supplementary_material [file 09c534e7_solutions.pdf › CompressARC/results_for_the_blog_post/plots_evaluation/09c534e7_solutions.pdf]

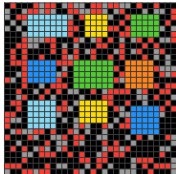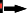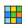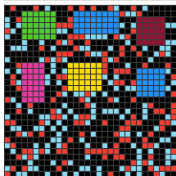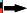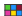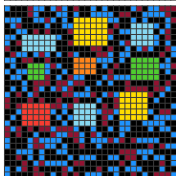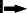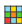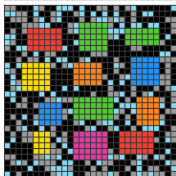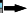

?

Supplement: supplementary_material [file 0a1d4ef5_problem.pdf › CompressARC/results_for_the_blog_post/plots_evaluation/0a1d4ef5_problem.pdf]

sample

sample average

guess 1

guess 2

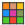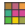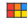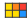

Supplement: supplementary_material [file 0a1d4ef5_solutions.pdf › CompressARC/results_for_the_blog_post/plots_evaluation/0a1d4ef5_solutions.pdf]

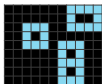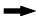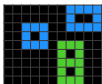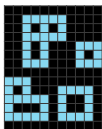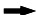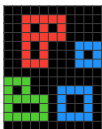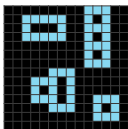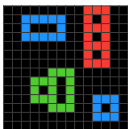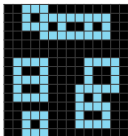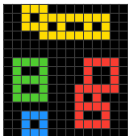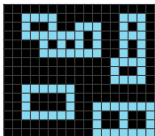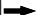

?

Supplement: supplementary_material [file 0a2355a6_problem.pdf › CompressARC/results_for_the_blog_post/plots_evaluation/0a2355a6_problem.pdf]

sample

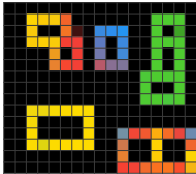

sample average

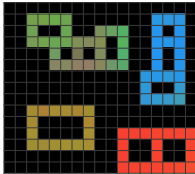

guess 1

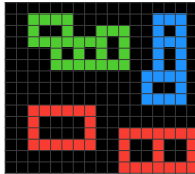

guess 2

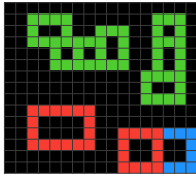

Supplement: supplementary_material [file 0a2355a6_solutions.pdf › CompressARC/results_for_the_blog_post/plots_evaluation/0a2355a6_solutions.pdf]

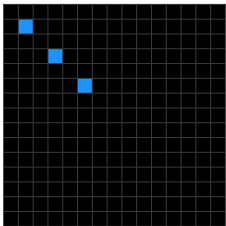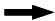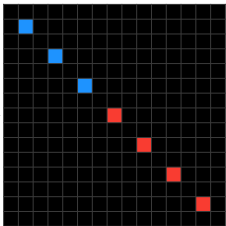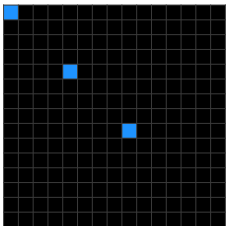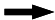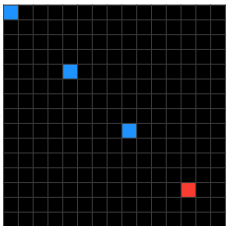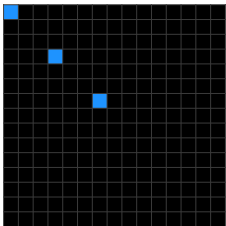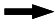

?

Supplement: supplementary_material [file 0b17323b_problem.pdf › CompressARC/results_for_the_blog_post/plots_evaluation/0b17323b_problem.pdf]

sample

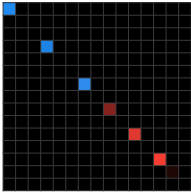

sample average

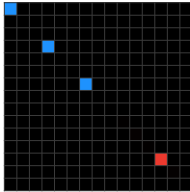

guess 1

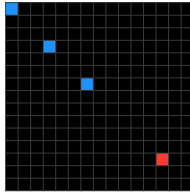

guess 2

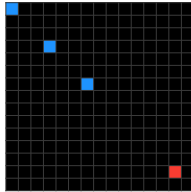

Supplement: supplementary_material [file 0b17323b_solutions.pdf › CompressARC/results_for_the_blog_post/plots_evaluation/0b17323b_solutions.pdf]

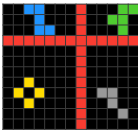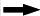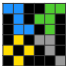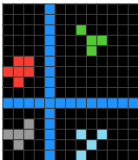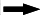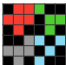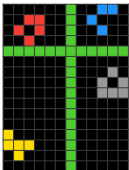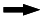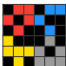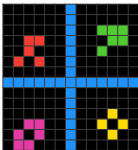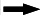

?

Supplement: supplementary_material [file 0bb8deee_problem.pdf › CompressARC/results_for_the_blog_post/plots_evaluation/0bb8deee_problem.pdf]

sample

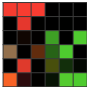

sample average

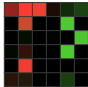

guess 1

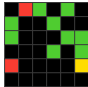

guess 2

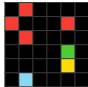

Supplement: supplementary_material [file 0bb8deee_solutions.pdf › CompressARC/results_for_the_blog_post/plots_evaluation/0bb8deee_solutions.pdf]

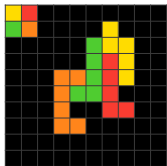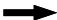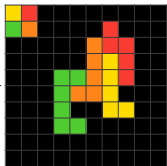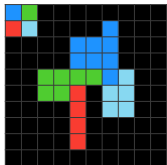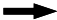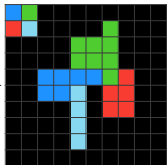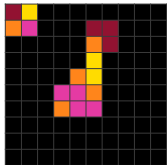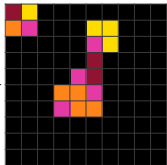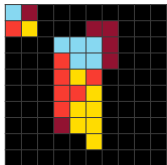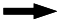

?

Supplement: supplementary_material [file 0becf7df_problem.pdf › CompressARC/results_for_the_blog_post/plots_evaluation/0becf7df_problem.pdf]

sample

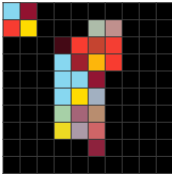

sample average

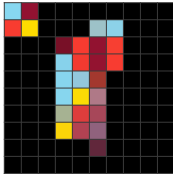

guess 1

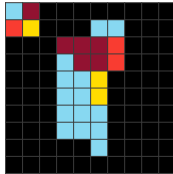

guess 2

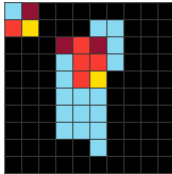

Supplement: supplementary_material [file 0becf7df_solutions.pdf › CompressARC/results_for_the_blog_post/plots_evaluation/0becf7df_solutions.pdf]

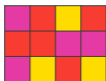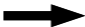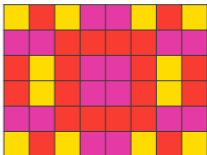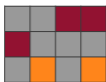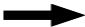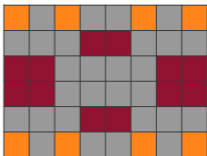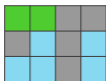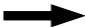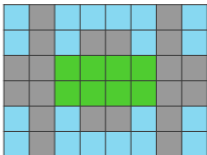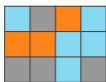

?

Supplement: supplementary_material [file 0c786b71_problem.pdf › CompressARC/results_for_the_blog_post/plots_evaluation/0c786b71_problem.pdf]

sample

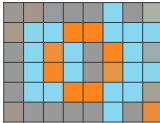

sample average

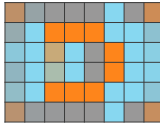

guess 1

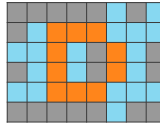

guess 2

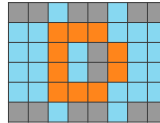

Supplement: supplementary_material [file 0c786b71_solutions.pdf › CompressARC/results_for_the_blog_post/plots_evaluation/0c786b71_solutions.pdf]

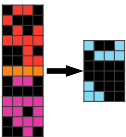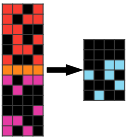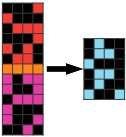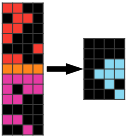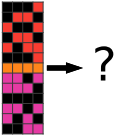

Supplement: supplementary_material [file 0c9aba6e_problem.pdf › CompressARC/results_for_the_blog_post/plots_evaluation/0c9aba6e_problem.pdf]

sample

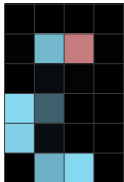

sample average

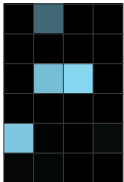

guess 1

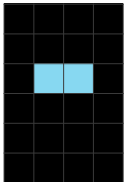

guess 2

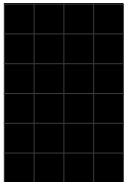

Supplement: supplementary_material [file 0c9aba6e_solutions.pdf › CompressARC/results_for_the_blog_post/plots_evaluation/0c9aba6e_solutions.pdf]

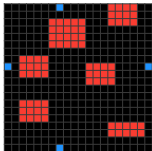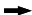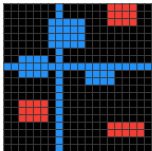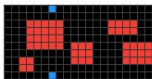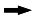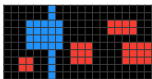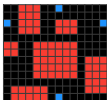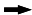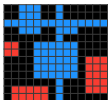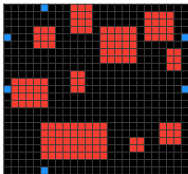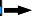

?

Supplement: supplementary_material [file 0d87d2a6_problem.pdf › CompressARC/results_for_the_blog_post/plots_evaluation/0d87d2a6_problem.pdf]

sample

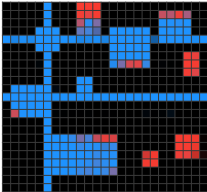

sample average

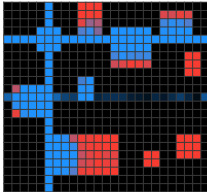

guess 1

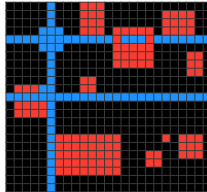

guess 2

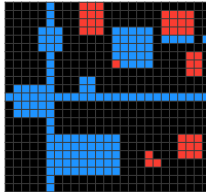

Supplement: supplementary_material [file 0d87d2a6_solutions.pdf › CompressARC/results_for_the_blog_post/plots_evaluation/0d87d2a6_solutions.pdf]

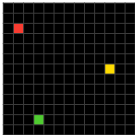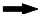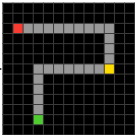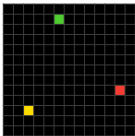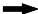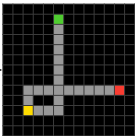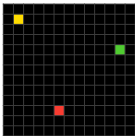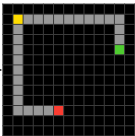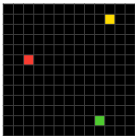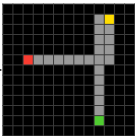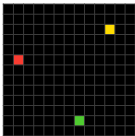

?

Supplement: supplementary_material [file 0e671a1a_problem.pdf › CompressARC/results_for_the_blog_post/plots_evaluation/0e671a1a_problem.pdf]

sample

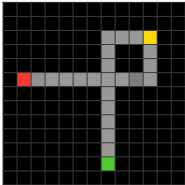

sample average

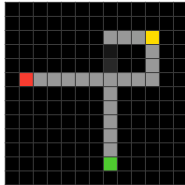

guess 1

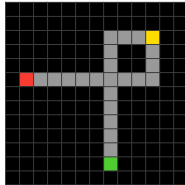

guess 2

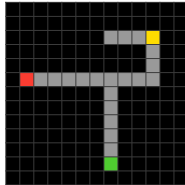

Supplement: supplementary_material [file 0e671a1a_solutions.pdf › CompressARC/results_for_the_blog_post/plots_evaluation/0e671a1a_solutions.pdf]

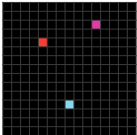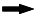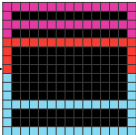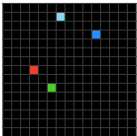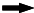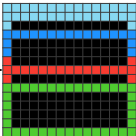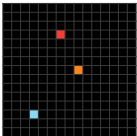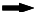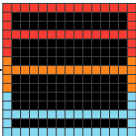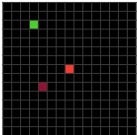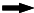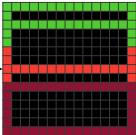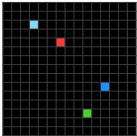

?

Supplement: supplementary_material [file 0f63c0b9_problem.pdf › CompressARC/results_for_the_blog_post/plots_evaluation/0f63c0b9_problem.pdf]

sample

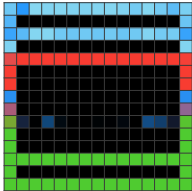

sample average

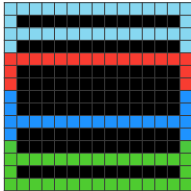

guess 1

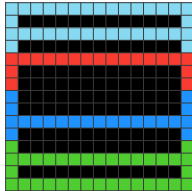

guess 2

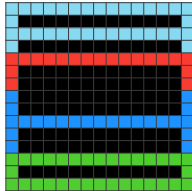

Supplement: supplementary_material [file 0f63c0b9_solutions.pdf › CompressARC/results_for_the_blog_post/plots_evaluation/0f63c0b9_solutions.pdf]

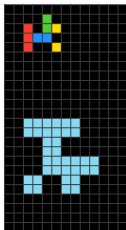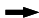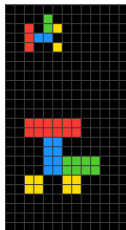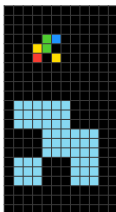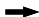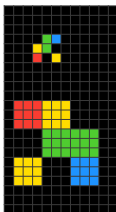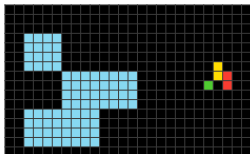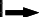

?

Supplement: supplementary_material [file 103eff5b_problem.pdf › CompressARC/results_for_the_blog_post/plots_evaluation/103eff5b_problem.pdf]

sample

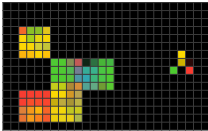

sample average

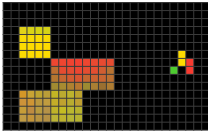

guess 1

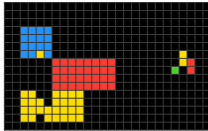

guess 2

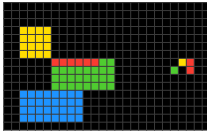

Supplement: supplementary_material [file 103eff5b_solutions.pdf › CompressARC/results_for_the_blog_post/plots_evaluation/103eff5b_solutions.pdf]

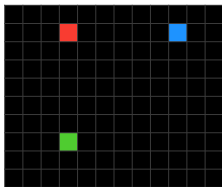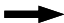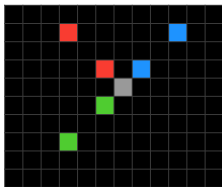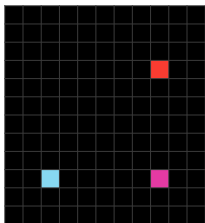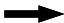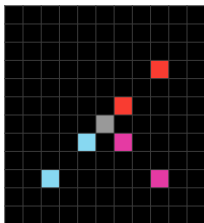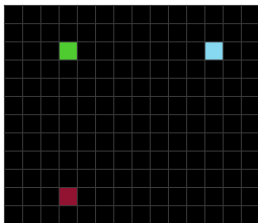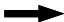

?

Supplement: supplementary_material [file 11e1fe23_problem.pdf › CompressARC/results_for_the_blog_post/plots_evaluation/11e1fe23_problem.pdf]

sample

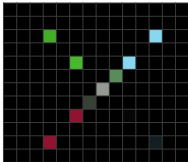

sample average

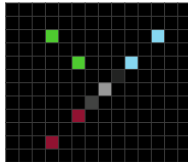

guess 1

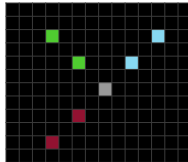

guess 2

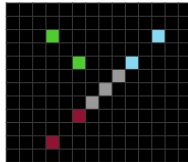

Supplement: supplementary_material [file 11e1fe23_solutions.pdf › CompressARC/results_for_the_blog_post/plots_evaluation/11e1fe23_solutions.pdf]

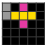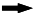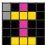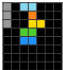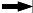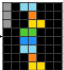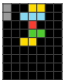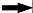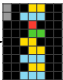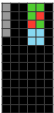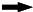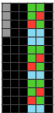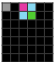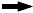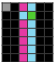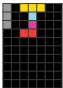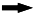

?

Supplement: supplementary_material [file 12422b43_problem.pdf › CompressARC/results_for_the_blog_post/plots_evaluation/12422b43_problem.pdf]

sample

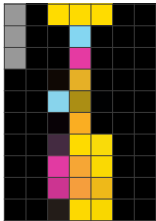

sample average

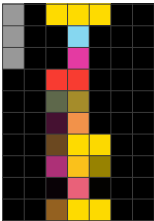

guess 1

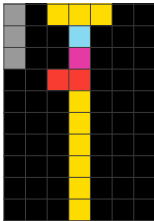

guess 2

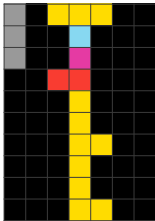

Supplement: supplementary_material [file 12422b43_solutions.pdf › CompressARC/results_for_the_blog_post/plots_evaluation/12422b43_solutions.pdf]

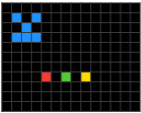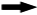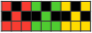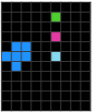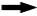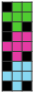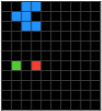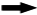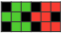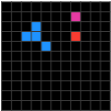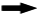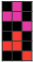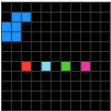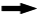

?

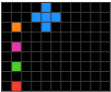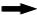

?

Supplement: supplementary_material [file 12997ef3_problem.pdf › CompressARC/results_for_the_blog_post/plots_evaluation/12997ef3_problem.pdf]

sample

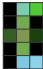

sample average

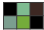

guess 1

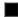

guess 2

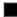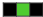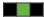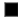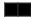

Supplement: supplementary_material [file 12997ef3_solutions.pdf › CompressARC/results_for_the_blog_post/plots_evaluation/12997ef3_solutions.pdf]

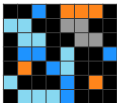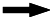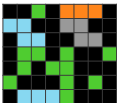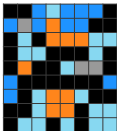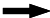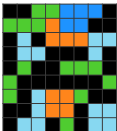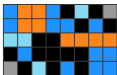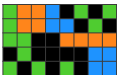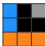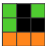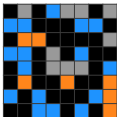

?

Supplement: supplementary_material [file 12eac192_problem.pdf › CompressARC/results_for_the_blog_post/plots_evaluation/12eac192_problem.pdf]

sample

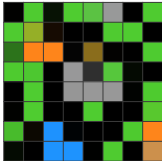

sample average

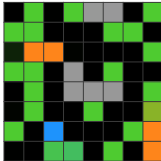

guess 1

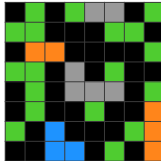

guess 2

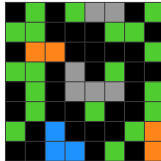

Supplement: supplementary_material [file 12eac192_solutions.pdf › CompressARC/results_for_the_blog_post/plots_evaluation/12eac192_solutions.pdf]

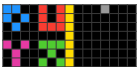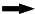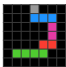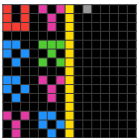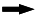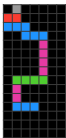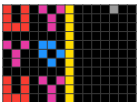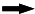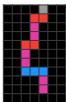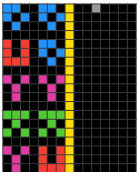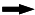

?

Supplement: supplementary_material [file 136b0064_problem.pdf › CompressARC/results_for_the_blog_post/plots_evaluation/136b0064_problem.pdf]

sample

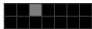

sample average

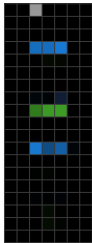

guess 1

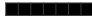

guess 2

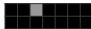

Supplement: supplementary_material [file 136b0064_solutions.pdf › CompressARC/results_for_the_blog_post/plots_evaluation/136b0064_solutions.pdf]

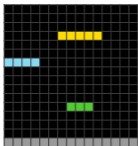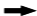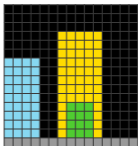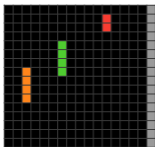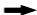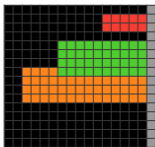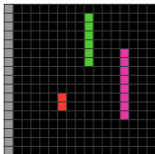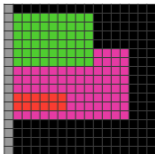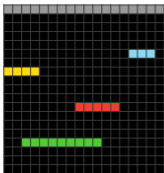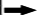

?

Supplement: supplementary_material [file 13713586_problem.pdf › CompressARC/results_for_the_blog_post/plots_evaluation/13713586_problem.pdf]

sample

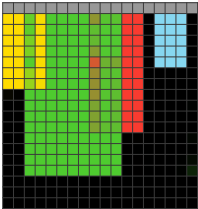

sample average

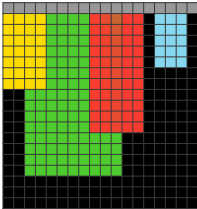

guess 1

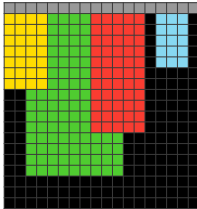

guess 2

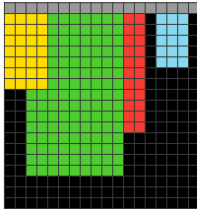

Supplement: supplementary_material [file 13713586_solutions.pdf › CompressARC/results_for_the_blog_post/plots_evaluation/13713586_solutions.pdf]

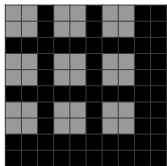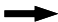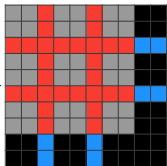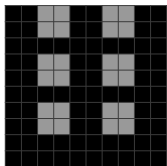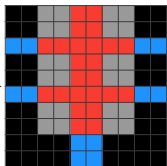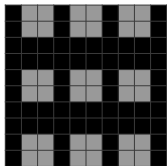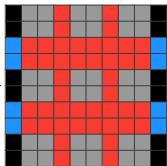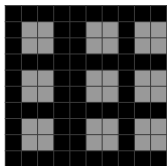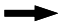

?

Supplement: supplementary_material [file 137f0df0_problem.pdf › CompressARC/results_for_the_blog_post/plots_evaluation/137f0df0_problem.pdf]

sample

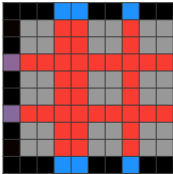

sample average

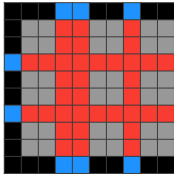

guess 1

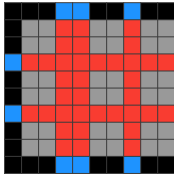

guess 2

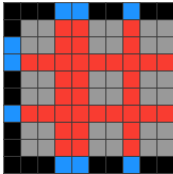

Supplement: supplementary_material [file 137f0df0_solutions.pdf › CompressARC/results_for_the_blog_post/plots_evaluation/137f0df0_solutions.pdf]

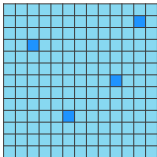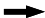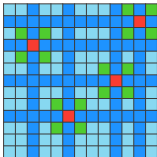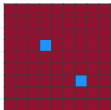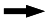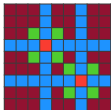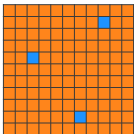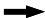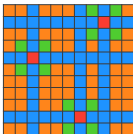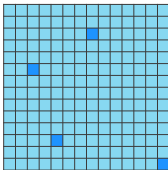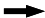

?

Supplement: supplementary_material [file 140c817e_problem.pdf › CompressARC/results_for_the_blog_post/plots_evaluation/140c817e_problem.pdf]

sample

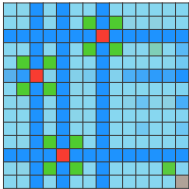

sample average

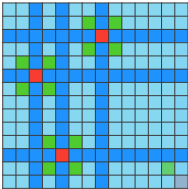

guess 1

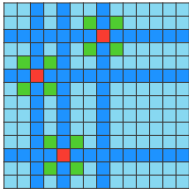

guess 2

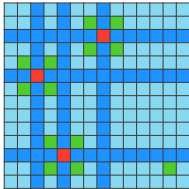

Supplement: supplementary_material [file 140c817e_solutions.pdf › CompressARC/results_for_the_blog_post/plots_evaluation/140c817e_solutions.pdf]

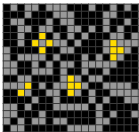

Supplement: supplementary_material [file 14754a24_problem.pdf › CompressARC/results_for_the_blog_post/plots_evaluation/14754a24_problem.pdf]

sample

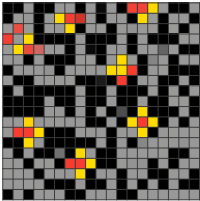

sample average

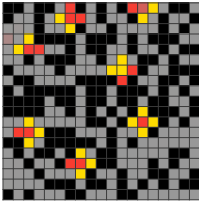

guess 1

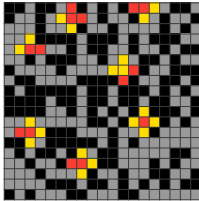

guess 2

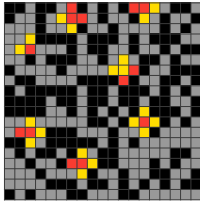

Supplement: supplementary_material [file 14754a24_solutions.pdf › CompressARC/results_for_the_blog_post/plots_evaluation/14754a24_solutions.pdf]

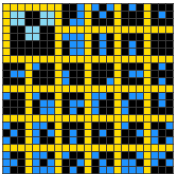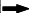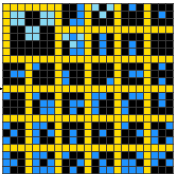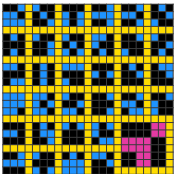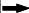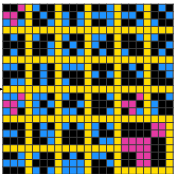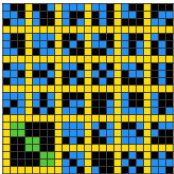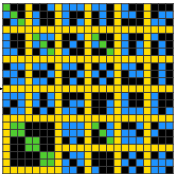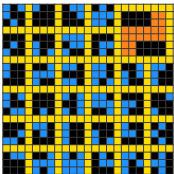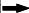

?

Supplement: supplementary_material [file 15113be4_problem.pdf › CompressARC/results_for_the_blog_post/plots_evaluation/15113be4_problem.pdf]

sample

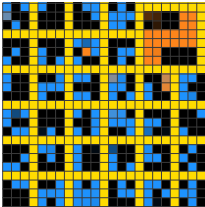

sample average

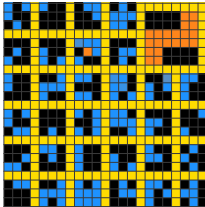

guess 1

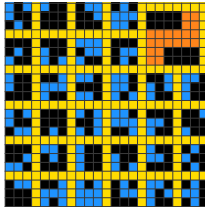

guess 2

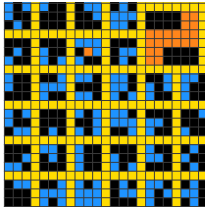

Supplement: supplementary_material [file 15113be4_solutions.pdf › CompressARC/results_for_the_blog_post/plots_evaluation/15113be4_solutions.pdf]

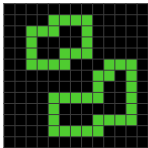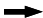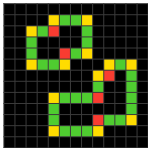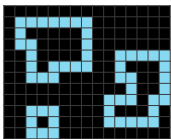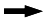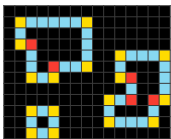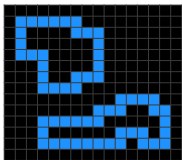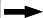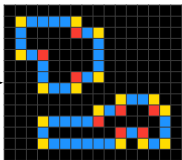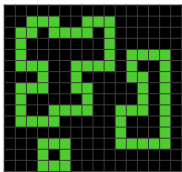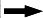

?

Supplement: supplementary_material [file 15663ba9_problem.pdf › CompressARC/results_for_the_blog_post/plots_evaluation/15663ba9_problem.pdf]

sample

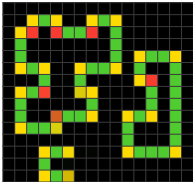

sample average

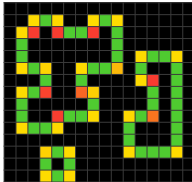

guess 1

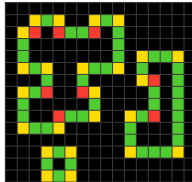

guess 2

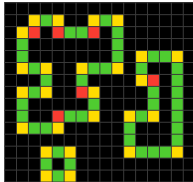

Supplement: supplementary_material [file 15663ba9_solutions.pdf › CompressARC/results_for_the_blog_post/plots_evaluation/15663ba9_solutions.pdf]

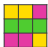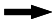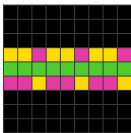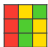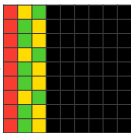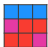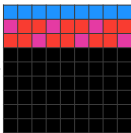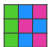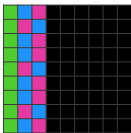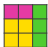

?

Supplement: supplementary_material [file 15696249_problem.pdf › CompressARC/results_for_the_blog_post/plots_evaluation/15696249_problem.pdf]

sample

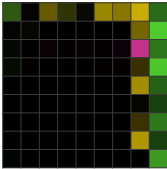

sample average

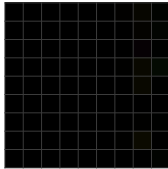

guess 1

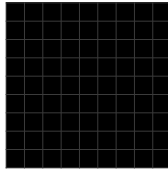

guess 2

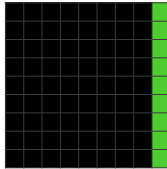

Supplement: supplementary_material [file 15696249_solutions.pdf › CompressARC/results_for_the_blog_post/plots_evaluation/15696249_solutions.pdf]

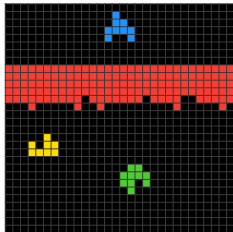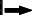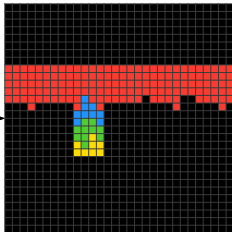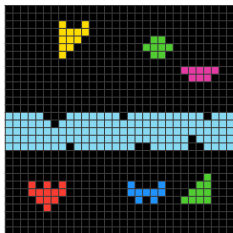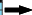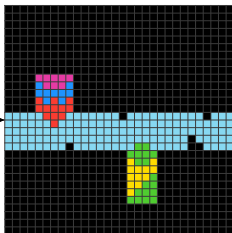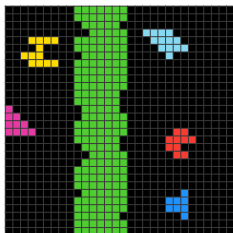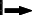

?

Supplement: supplementary_material [file 16b78196_problem.pdf › CompressARC/results_for_the_blog_post/plots_evaluation/16b78196_problem.pdf]

sample

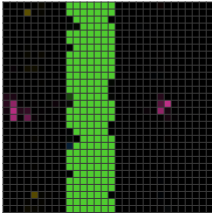

sample average

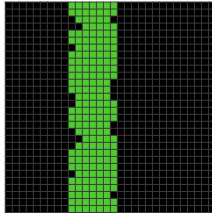

guess 1

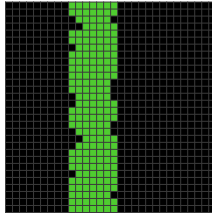

guess 2

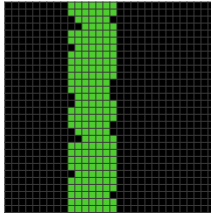

Supplement: supplementary_material [file 16b78196_solutions.pdf › CompressARC/results_for_the_blog_post/plots_evaluation/16b78196_solutions.pdf]

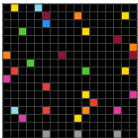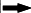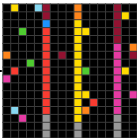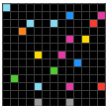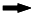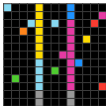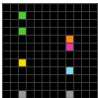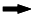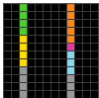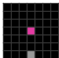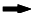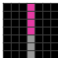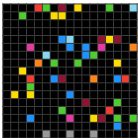

?

Supplement: supplementary_material [file 17b80ad2_problem.pdf › CompressARC/results_for_the_blog_post/plots_evaluation/17b80ad2_problem.pdf]

sample

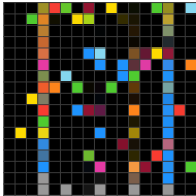

sample average

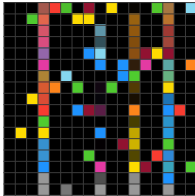

guess 1

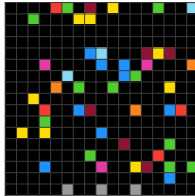

guess 2

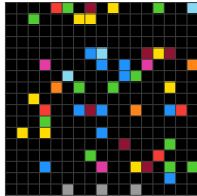

Supplement: supplementary_material [file 17b80ad2_solutions.pdf › CompressARC/results_for_the_blog_post/plots_evaluation/17b80ad2_solutions.pdf]

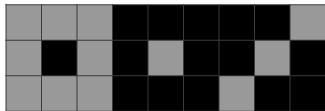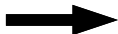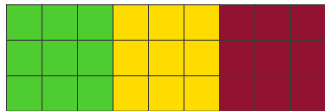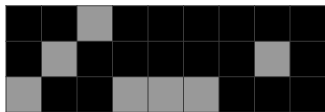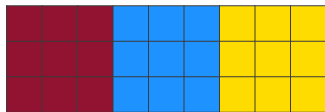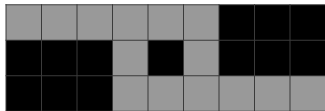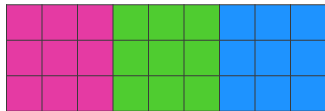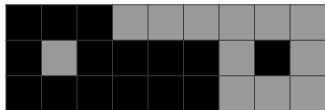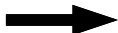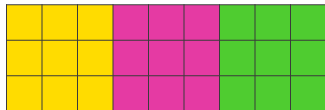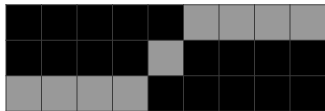

?

Supplement: supplementary_material [file 17cae0c1_problem.pdf › CompressARC/results_for_the_blog_post/plots_evaluation/17cae0c1_problem.pdf]

sample

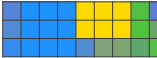

sample average

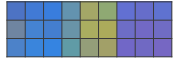

guess 1

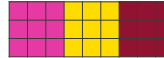

guess 2

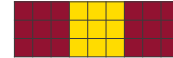

Supplement: supplementary_material [file 17cae0c1_solutions.pdf › CompressARC/results_for_the_blog_post/plots_evaluation/17cae0c1_solutions.pdf]

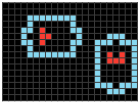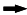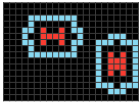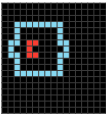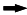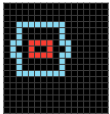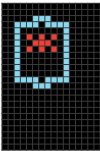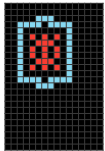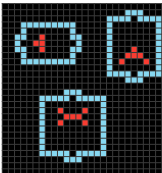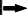

?

Supplement: supplementary_material [file 18419cfa_problem.pdf › CompressARC/results_for_the_blog_post/plots_evaluation/18419cfa_problem.pdf]

sample

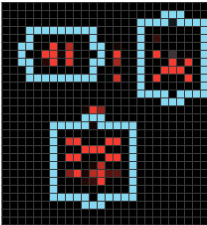

sample average

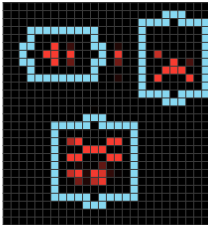

guess 1

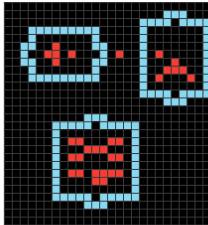

guess 2

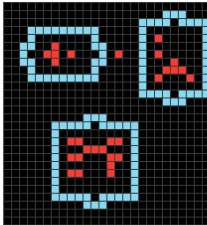

Supplement: supplementary_material [file 18419cfa_solutions.pdf › CompressARC/results_for_the_blog_post/plots_evaluation/18419cfa_solutions.pdf]

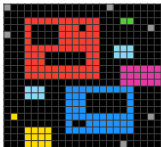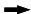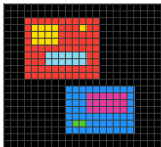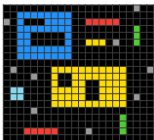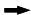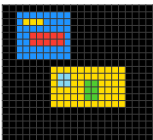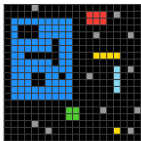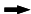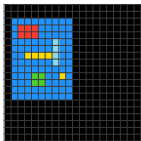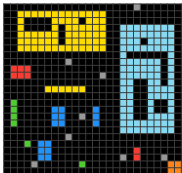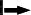

?

Supplement: supplementary_material [file 184a9768_problem.pdf › CompressARC/results_for_the_blog_post/plots_evaluation/184a9768_problem.pdf]

sample

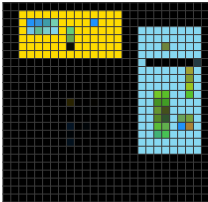

sample average

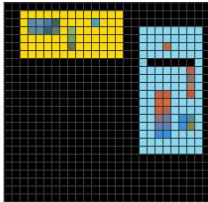

guess 1

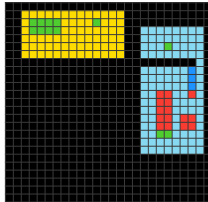

guess 2

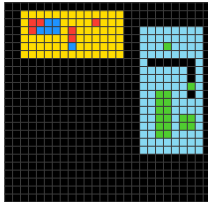

Supplement: supplementary_material [file 184a9768_solutions.pdf › CompressARC/results_for_the_blog_post/plots_evaluation/184a9768_solutions.pdf]

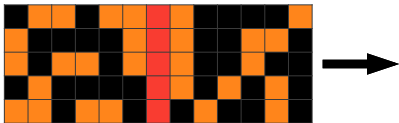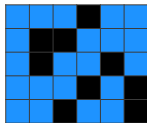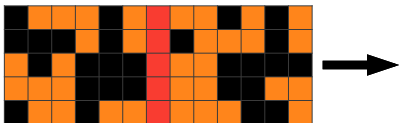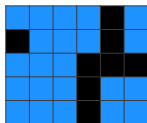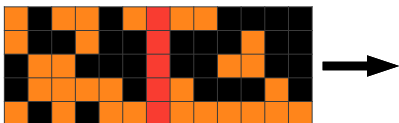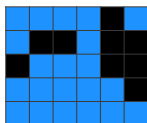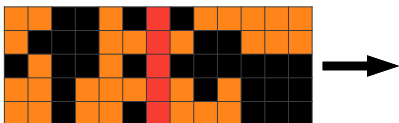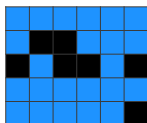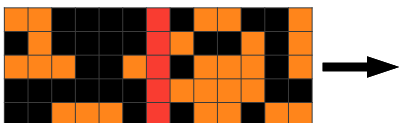

?

Supplement: supplementary_material [file 195ba7dc_problem.pdf › CompressARC/results_for_the_blog_post/plots_evaluation/195ba7dc_problem.pdf]

sample

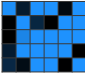

sample average

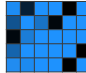

guess 1

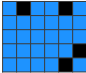

guess 2

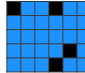

Supplement: supplementary_material [file 195ba7dc_solutions.pdf › CompressARC/results_for_the_blog_post/plots_evaluation/195ba7dc_solutions.pdf]

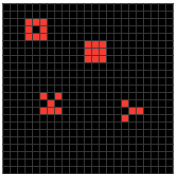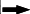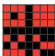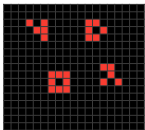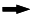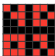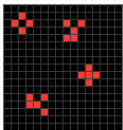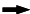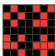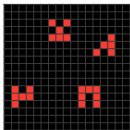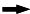

?

Supplement: supplementary_material [file 1990f7a8_problem.pdf › CompressARC/results_for_the_blog_post/plots_evaluation/1990f7a8_problem.pdf]
