# Supplementary material (part 6 of 17)
Source: ML conference proceedings conference paper supplement (https://openreview.net/forum?id=jLC662Yo5h)

sample

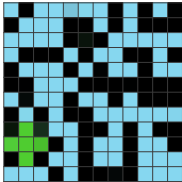

sample average

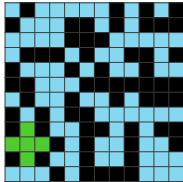

guess 1

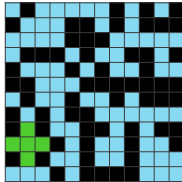

guess 2

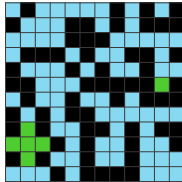

Supplement: supplementary_material [file 7e02026e_solutions.pdf › CompressARC/results_for_the_blog_post/plots_evaluation/7e02026e_solutions.pdf]

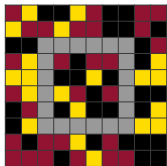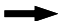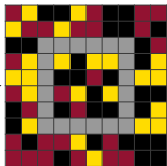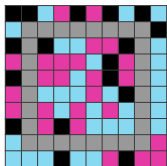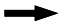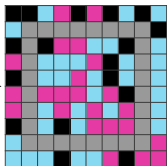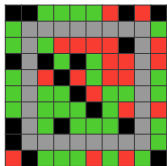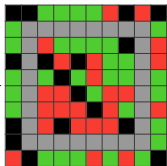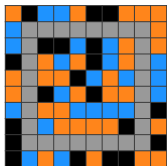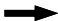

?

Supplement: supplementary_material [file 7ee1c6ea_problem.pdf › CompressARC/results_for_the_blog_post/plots_evaluation/7ee1c6ea_problem.pdf]

sample

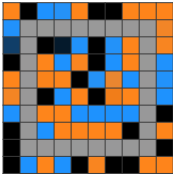

sample average

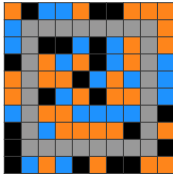

guess 1

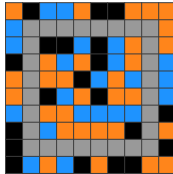

guess 2

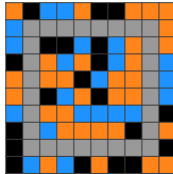

Supplement: supplementary_material [file 7ee1c6ea_solutions.pdf › CompressARC/results_for_the_blog_post/plots_evaluation/7ee1c6ea_solutions.pdf]

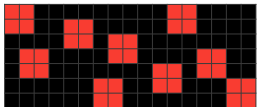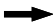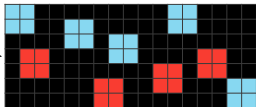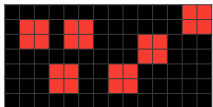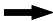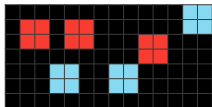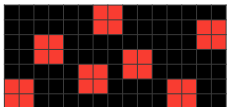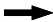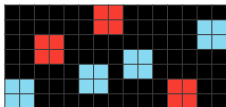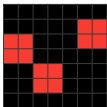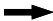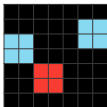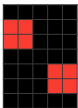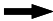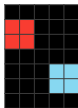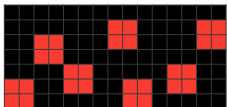

?

Supplement: supplementary_material [file 817e6c09_problem.pdf › CompressARC/results_for_the_blog_post/plots_evaluation/817e6c09_problem.pdf]

sample

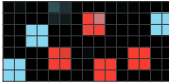

sample average

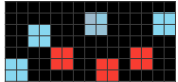

guess 1

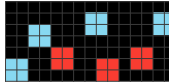

guess 2

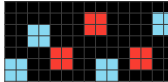

Supplement: supplementary_material [file 817e6c09_solutions.pdf › CompressARC/results_for_the_blog_post/plots_evaluation/817e6c09_solutions.pdf]

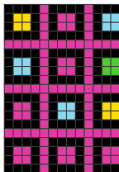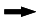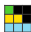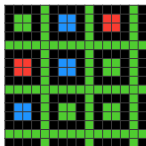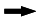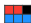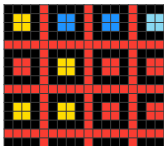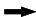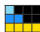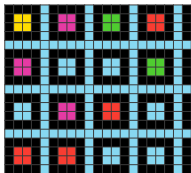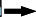

?

Supplement: supplementary_material [file 81c0276b_problem.pdf › CompressARC/results_for_the_blog_post/plots_evaluation/81c0276b_problem.pdf]

sample

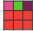

sample average

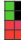

guess 1

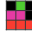

guess 2

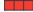

Supplement: supplementary_material [file 81c0276b_solutions.pdf › CompressARC/results_for_the_blog_post/plots_evaluation/81c0276b_solutions.pdf]

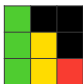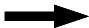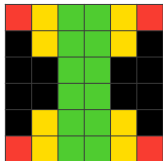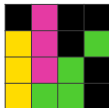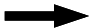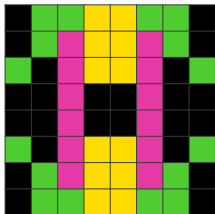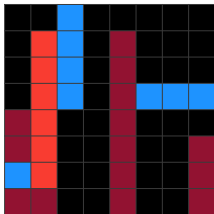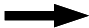

?

Supplement: supplementary_material [file 833dafe3_problem.pdf › CompressARC/results_for_the_blog_post/plots_evaluation/833dafe3_problem.pdf]

sample

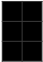

sample average

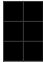

guess 1

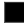

guess 2

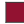

Supplement: supplementary_material [file 833dafe3_solutions.pdf › CompressARC/results_for_the_blog_post/plots_evaluation/833dafe3_solutions.pdf]

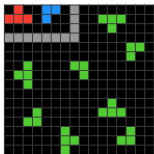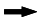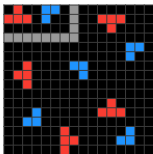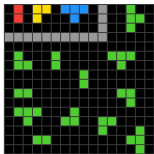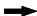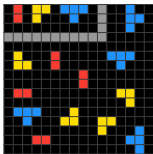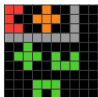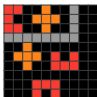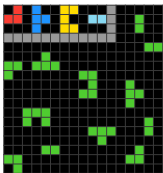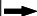

?

Supplement: supplementary_material [file 845d6e51_problem.pdf › CompressARC/results_for_the_blog_post/plots_evaluation/845d6e51_problem.pdf]

sample

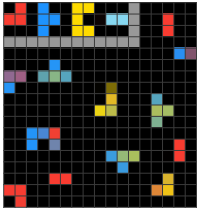

sample average

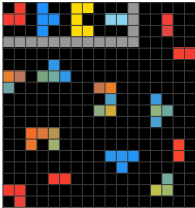

guess 1

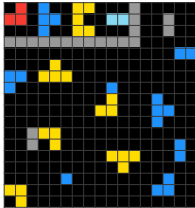

guess 2

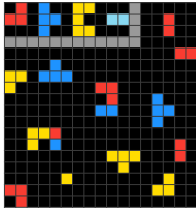

Supplement: supplementary_material [file 845d6e51_solutions.pdf › CompressARC/results_for_the_blog_post/plots_evaluation/845d6e51_solutions.pdf]

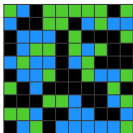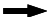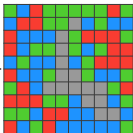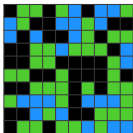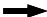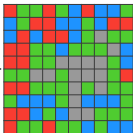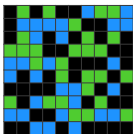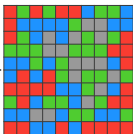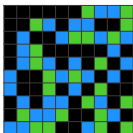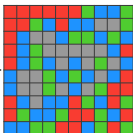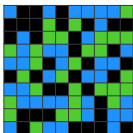

?

Supplement: supplementary_material [file 84db8fc4_problem.pdf › CompressARC/results_for_the_blog_post/plots_evaluation/84db8fc4_problem.pdf]

sample

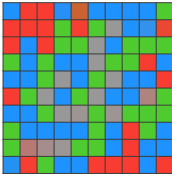

sample average

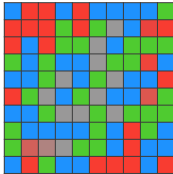

guess 1

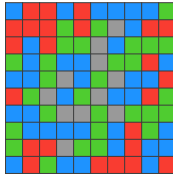

guess 2

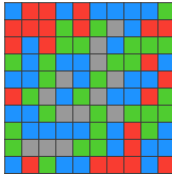

Supplement: supplementary_material [file 84db8fc4_solutions.pdf › CompressARC/results_for_the_blog_post/plots_evaluation/84db8fc4_solutions.pdf]

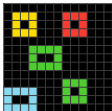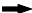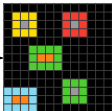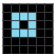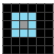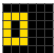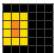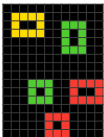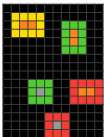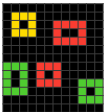

?

Supplement: supplementary_material [file 84f2aca1_problem.pdf › CompressARC/results_for_the_blog_post/plots_evaluation/84f2aca1_problem.pdf]

sample

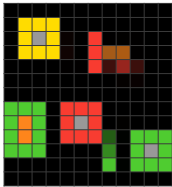

sample average

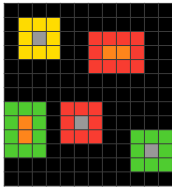

guess 1

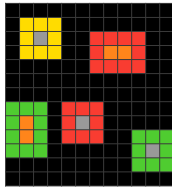

guess 2

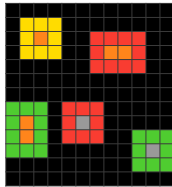

Supplement: supplementary_material [file 84f2aca1_solutions.pdf › CompressARC/results_for_the_blog_post/plots_evaluation/84f2aca1_solutions.pdf]

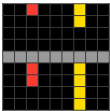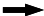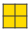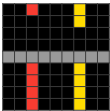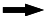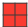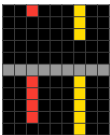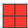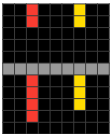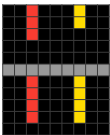

?

Supplement: supplementary_material [file 8597cfd7_problem.pdf › CompressARC/results_for_the_blog_post/plots_evaluation/8597cfd7_problem.pdf]

sample

sample average

guess 1

guess 2

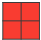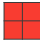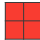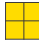

Supplement: supplementary_material [file 8597cfd7_solutions.pdf › CompressARC/results_for_the_blog_post/plots_evaluation/8597cfd7_solutions.pdf]

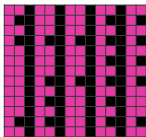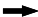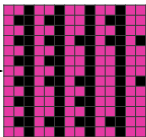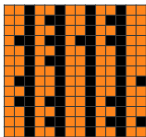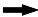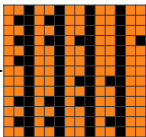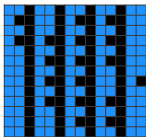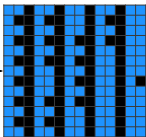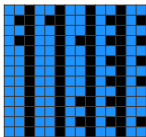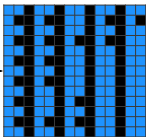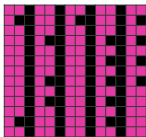

?

Supplement: supplementary_material [file 85b81ff1_problem.pdf › CompressARC/results_for_the_blog_post/plots_evaluation/85b81ff1_problem.pdf]

sample

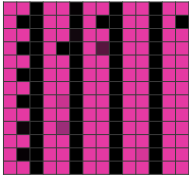

sample average

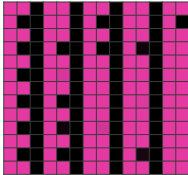

guess 1

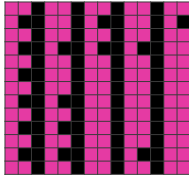

guess 2

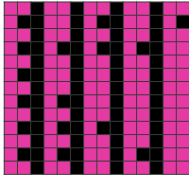

Supplement: supplementary_material [file 85b81ff1_solutions.pdf › CompressARC/results_for_the_blog_post/plots_evaluation/85b81ff1_solutions.pdf]

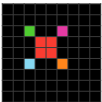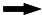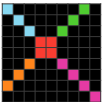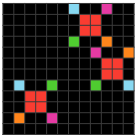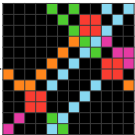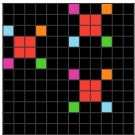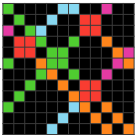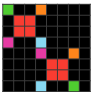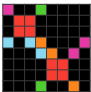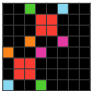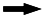

?

Supplement: supplementary_material [file 85fa5666_problem.pdf › CompressARC/results_for_the_blog_post/plots_evaluation/85fa5666_problem.pdf]

sample

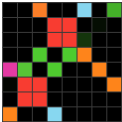

sample average

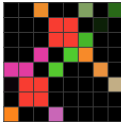

guess 1

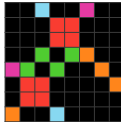

guess 2

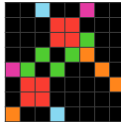

Supplement: supplementary_material [file 85fa5666_solutions.pdf › CompressARC/results_for_the_blog_post/plots_evaluation/85fa5666_solutions.pdf]

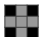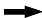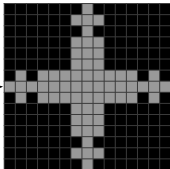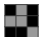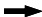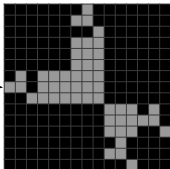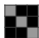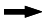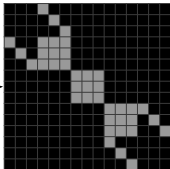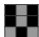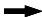

?

Supplement: supplementary_material [file 8719f442_problem.pdf › CompressARC/results_for_the_blog_post/plots_evaluation/8719f442_problem.pdf]

sample

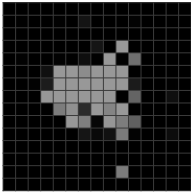

sample average

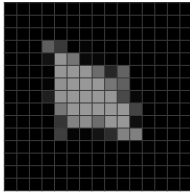

guess 1

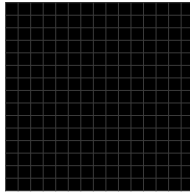

guess 2

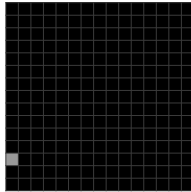

Supplement: supplementary_material [file 8719f442_solutions.pdf › CompressARC/results_for_the_blog_post/plots_evaluation/8719f442_solutions.pdf]

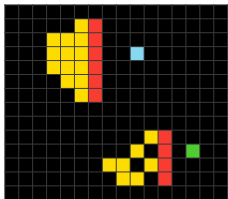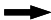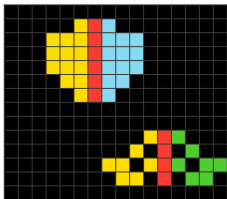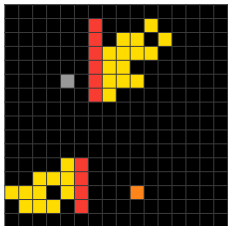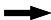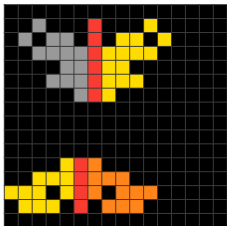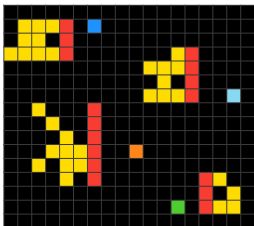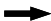

?

Supplement: supplementary_material [file 88207623_problem.pdf › CompressARC/results_for_the_blog_post/plots_evaluation/88207623_problem.pdf]

sample

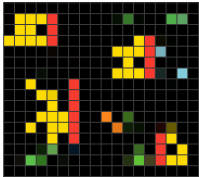

sample average

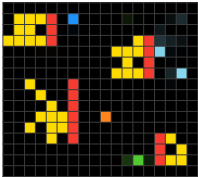

guess 1

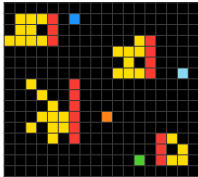

guess 2

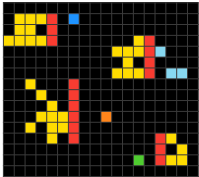

Supplement: supplementary_material [file 88207623_solutions.pdf › CompressARC/results_for_the_blog_post/plots_evaluation/88207623_solutions.pdf]

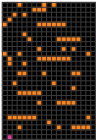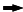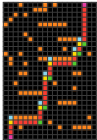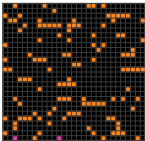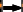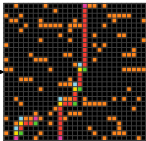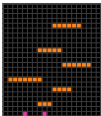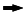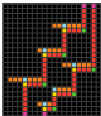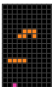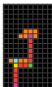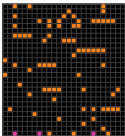

?

Supplement: supplementary_material [file 891232d6_problem.pdf › CompressARC/results_for_the_blog_post/plots_evaluation/891232d6_problem.pdf]

sample

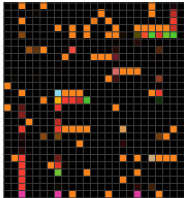

sample average

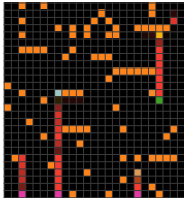

guess 1

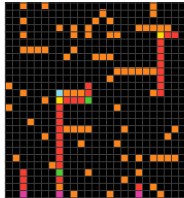

guess 2

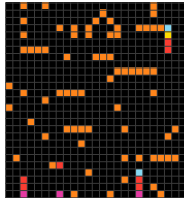

Supplement: supplementary_material [file 891232d6_solutions.pdf › CompressARC/results_for_the_blog_post/plots_evaluation/891232d6_solutions.pdf]

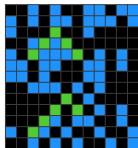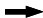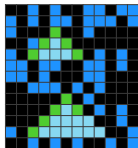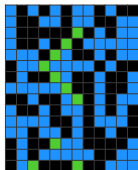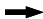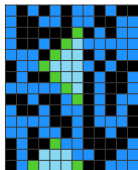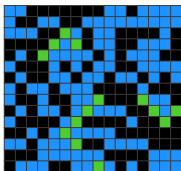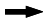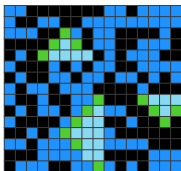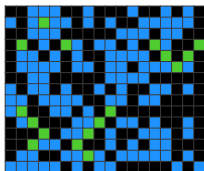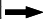

?

Supplement: supplementary_material [file 896d5239_problem.pdf › CompressARC/results_for_the_blog_post/plots_evaluation/896d5239_problem.pdf]

sample

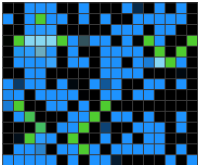

sample average

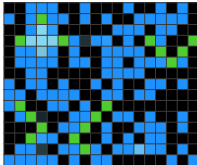

guess 1

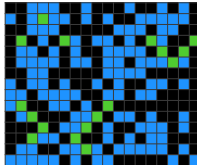

guess 2

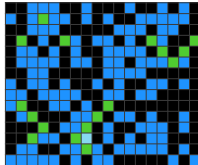

Supplement: supplementary_material [file 896d5239_solutions.pdf › CompressARC/results_for_the_blog_post/plots_evaluation/896d5239_solutions.pdf]

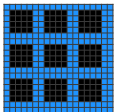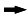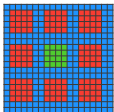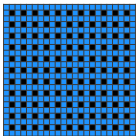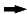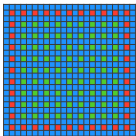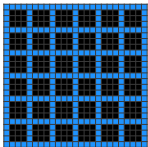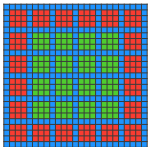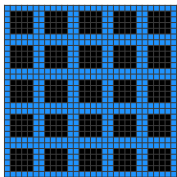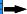

?

Supplement: supplementary_material [file 8a371977_problem.pdf › CompressARC/results_for_the_blog_post/plots_evaluation/8a371977_problem.pdf]

sample

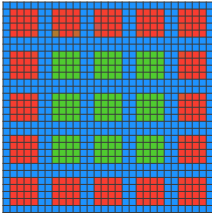

sample average

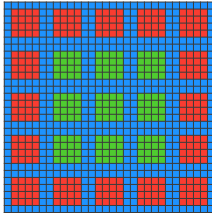

guess 1

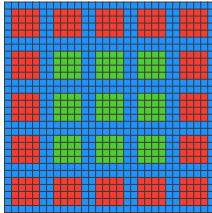

guess 2

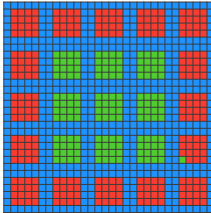

Supplement: supplementary_material [file 8a371977_solutions.pdf › CompressARC/results_for_the_blog_post/plots_evaluation/8a371977_solutions.pdf]

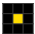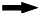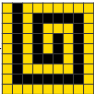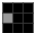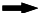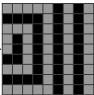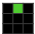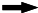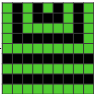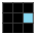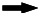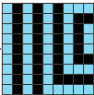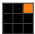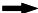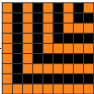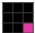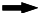

?

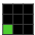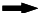

?

Supplement: supplementary_material [file 8b28cd80_problem.pdf › CompressARC/results_for_the_blog_post/plots_evaluation/8b28cd80_problem.pdf]

sample

sample average

guess 1

guess 2

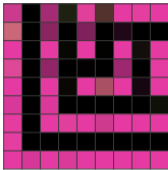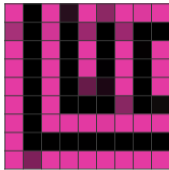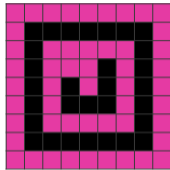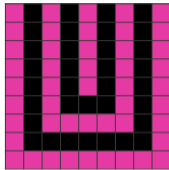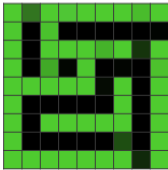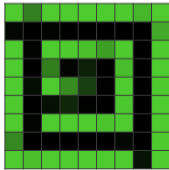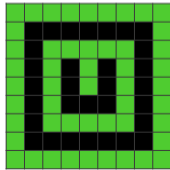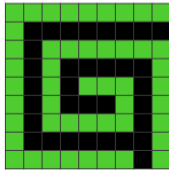

Supplement: supplementary_material [file 8b28cd80_solutions.pdf › CompressARC/results_for_the_blog_post/plots_evaluation/8b28cd80_solutions.pdf]

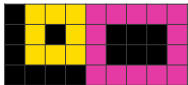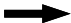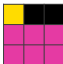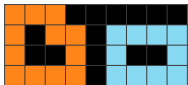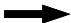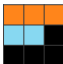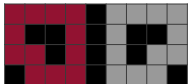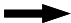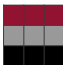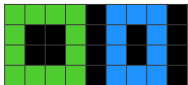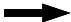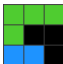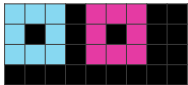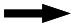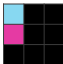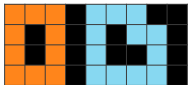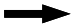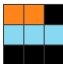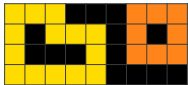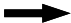

?

Supplement: supplementary_material [file 8ba14f53_problem.pdf › CompressARC/results_for_the_blog_post/plots_evaluation/8ba14f53_problem.pdf]

sample

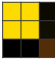

sample average

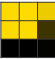

guess 1

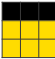

guess 2

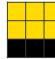

Supplement: supplementary_material [file 8ba14f53_solutions.pdf › CompressARC/results_for_the_blog_post/plots_evaluation/8ba14f53_solutions.pdf]

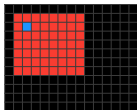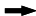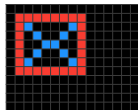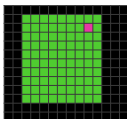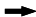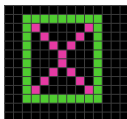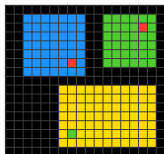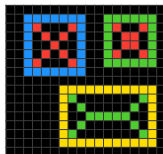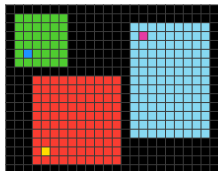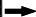

?

Supplement: supplementary_material [file 8cb8642d_problem.pdf › CompressARC/results_for_the_blog_post/plots_evaluation/8cb8642d_problem.pdf]

sample

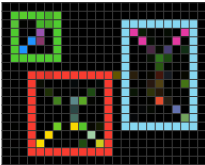

sample average

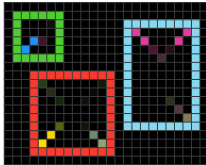

guess 1

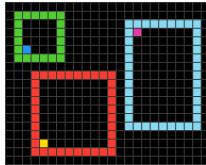

guess 2

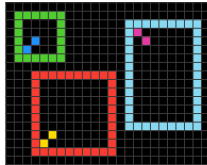

Supplement: supplementary_material [file 8cb8642d_solutions.pdf › CompressARC/results_for_the_blog_post/plots_evaluation/8cb8642d_solutions.pdf]

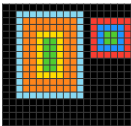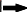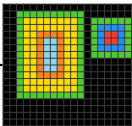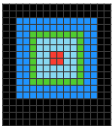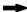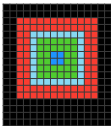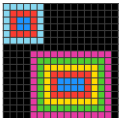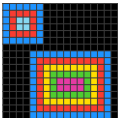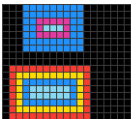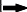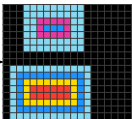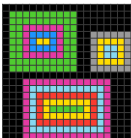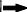

?

Supplement: supplementary_material [file 8dae5dfc_problem.pdf › CompressARC/results_for_the_blog_post/plots_evaluation/8dae5dfc_problem.pdf]

sample

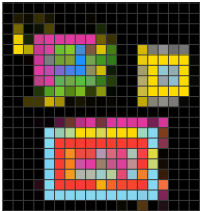

sample average

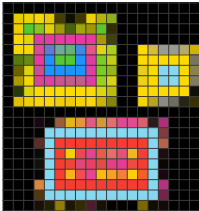

guess 1

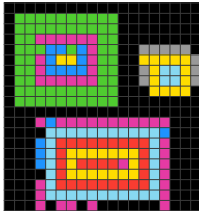

guess 2

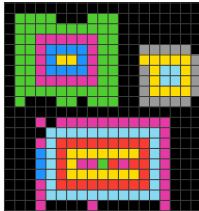

Supplement: supplementary_material [file 8dae5dfc_solutions.pdf › CompressARC/results_for_the_blog_post/plots_evaluation/8dae5dfc_solutions.pdf]

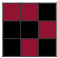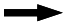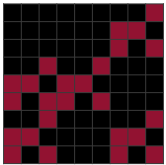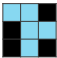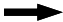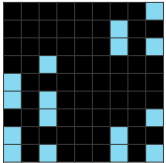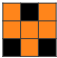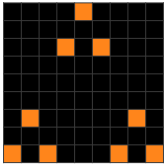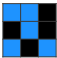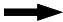

?

Supplement: supplementary_material [file 8e2edd66_problem.pdf › CompressARC/results_for_the_blog_post/plots_evaluation/8e2edd66_problem.pdf]

sample

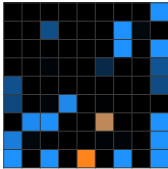

sample average

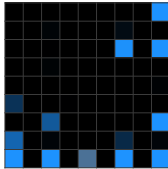

guess 1

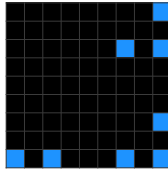

guess 2

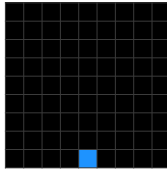

Supplement: supplementary_material [file 8e2edd66_solutions.pdf › CompressARC/results_for_the_blog_post/plots_evaluation/8e2edd66_solutions.pdf]

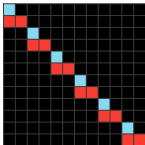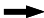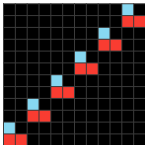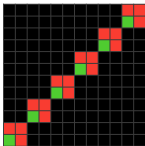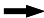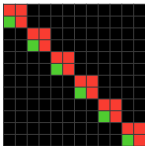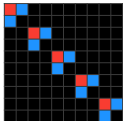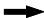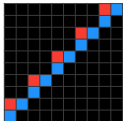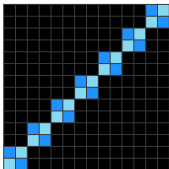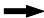

?

Supplement: supplementary_material [file 8ee62060_problem.pdf › CompressARC/results_for_the_blog_post/plots_evaluation/8ee62060_problem.pdf]

sample

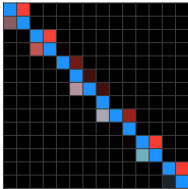

sample average

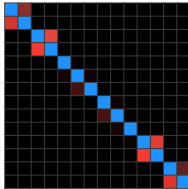

guess 1

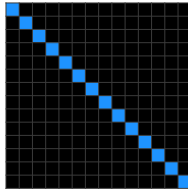

guess 2

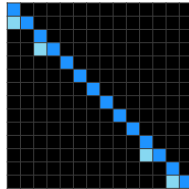

Supplement: supplementary_material [file 8ee62060_solutions.pdf › CompressARC/results_for_the_blog_post/plots_evaluation/8ee62060_solutions.pdf]

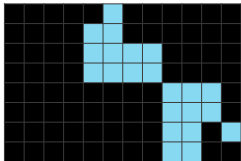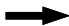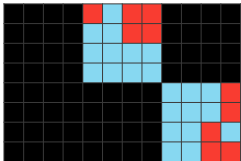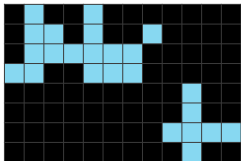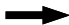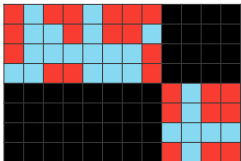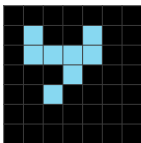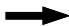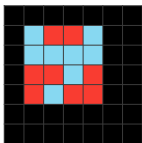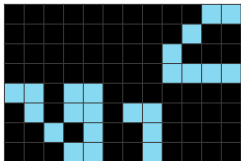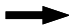

?

Supplement: supplementary_material [file 8fbca751_problem.pdf › CompressARC/results_for_the_blog_post/plots_evaluation/8fbca751_problem.pdf]

sample

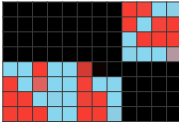

sample average

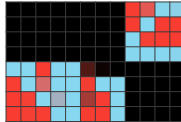

guess 1

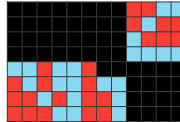

guess 2

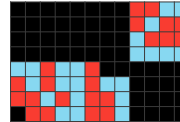

Supplement: supplementary_material [file 8fbca751_solutions.pdf › CompressARC/results_for_the_blog_post/plots_evaluation/8fbca751_solutions.pdf]

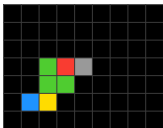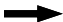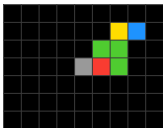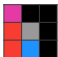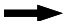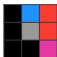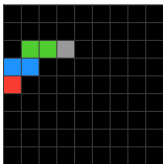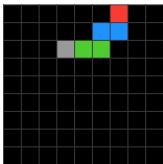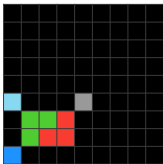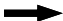

?

Supplement: supplementary_material [file 90347967_problem.pdf › CompressARC/results_for_the_blog_post/plots_evaluation/90347967_problem.pdf]

sample

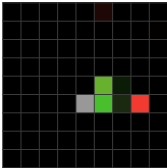

sample average

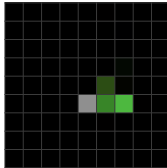

guess 1

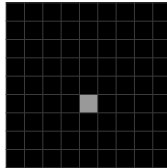

guess 2

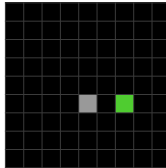

Supplement: supplementary_material [file 90347967_solutions.pdf › CompressARC/results_for_the_blog_post/plots_evaluation/90347967_solutions.pdf]

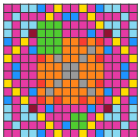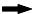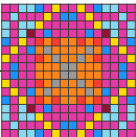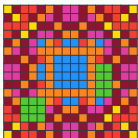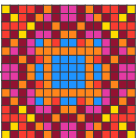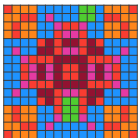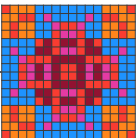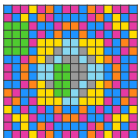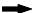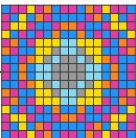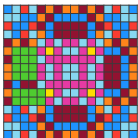

?

Supplement: supplementary_material [file 903d1b4a_problem.pdf › CompressARC/results_for_the_blog_post/plots_evaluation/903d1b4a_problem.pdf]

sample

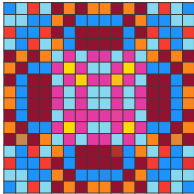

sample average

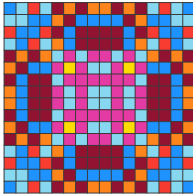

guess 1

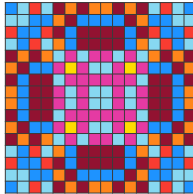

guess 2

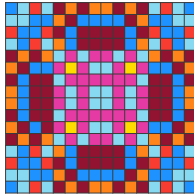

Supplement: supplementary_material [file 903d1b4a_solutions.pdf › CompressARC/results_for_the_blog_post/plots_evaluation/903d1b4a_solutions.pdf]

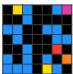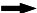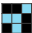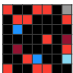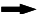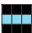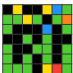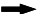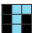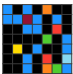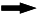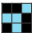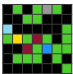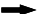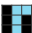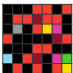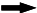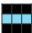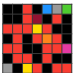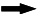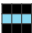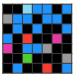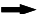

?

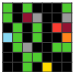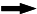

?

Supplement: supplementary_material [file 9110e3c5_problem.pdf › CompressARC/results_for_the_blog_post/plots_evaluation/9110e3c5_problem.pdf]

sample

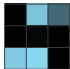

sample average

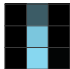

guess 1

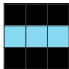

guess 2

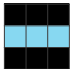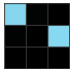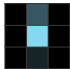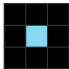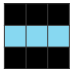

Supplement: supplementary_material [file 9110e3c5_solutions.pdf › CompressARC/results_for_the_blog_post/plots_evaluation/9110e3c5_solutions.pdf]

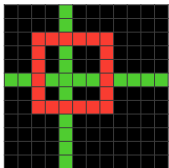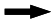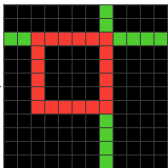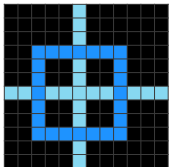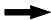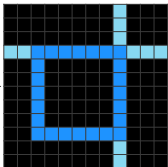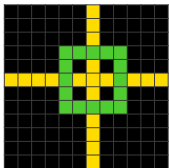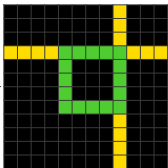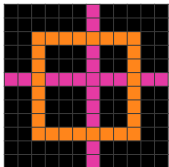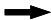

?

Supplement: supplementary_material [file 917bccba_problem.pdf › CompressARC/results_for_the_blog_post/plots_evaluation/917bccba_problem.pdf]

sample

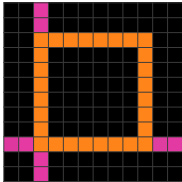

sample average

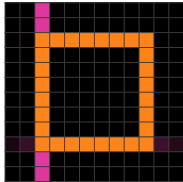

guess 1

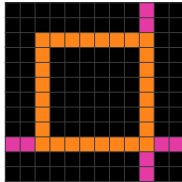

guess 2

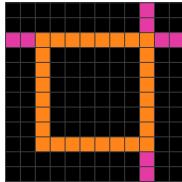

Supplement: supplementary_material [file 917bccba_solutions.pdf › CompressARC/results_for_the_blog_post/plots_evaluation/917bccba_solutions.pdf]

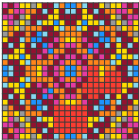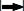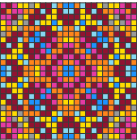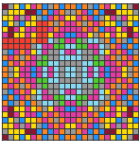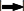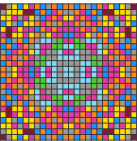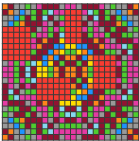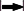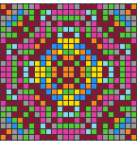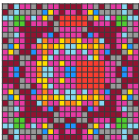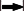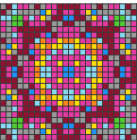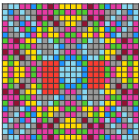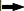

?

Supplement: supplementary_material [file 929ab4e9_problem.pdf › CompressARC/results_for_the_blog_post/plots_evaluation/929ab4e9_problem.pdf]

sample

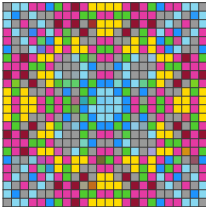

sample average

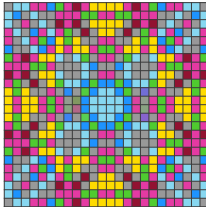

guess 1

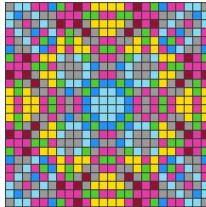

guess 2

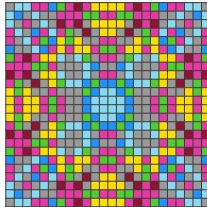

Supplement: supplementary_material [file 929ab4e9_solutions.pdf › CompressARC/results_for_the_blog_post/plots_evaluation/929ab4e9_solutions.pdf]

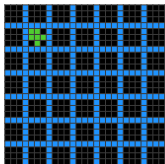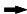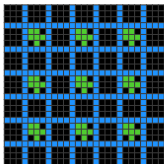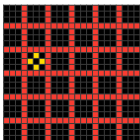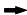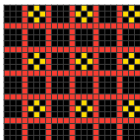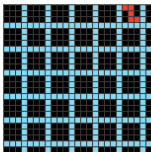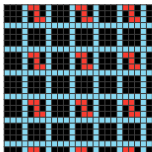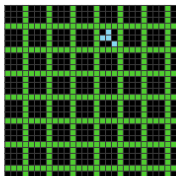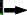

?

Supplement: supplementary_material [file 92e50de0_problem.pdf › CompressARC/results_for_the_blog_post/plots_evaluation/92e50de0_problem.pdf]

sample

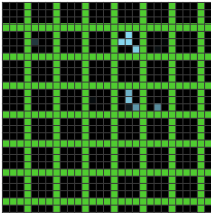

sample average

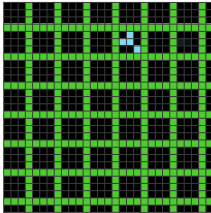

guess 1

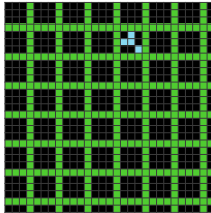

guess 2

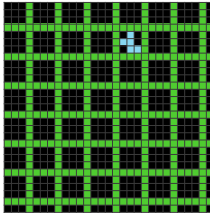

Supplement: supplementary_material [file 92e50de0_solutions.pdf › CompressARC/results_for_the_blog_post/plots_evaluation/92e50de0_solutions.pdf]

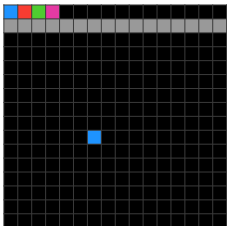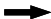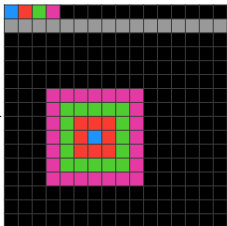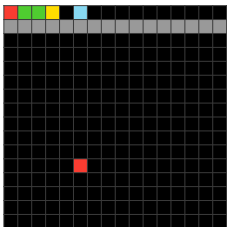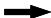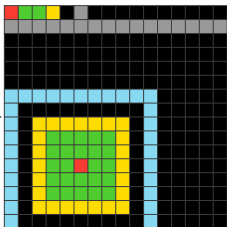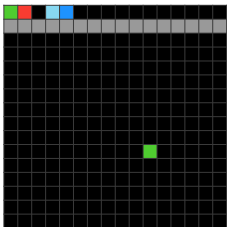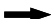

?

Supplement: supplementary_material [file 9356391f_problem.pdf › CompressARC/results_for_the_blog_post/plots_evaluation/9356391f_problem.pdf]

sample

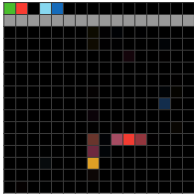

sample average

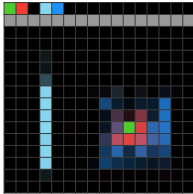

guess 1

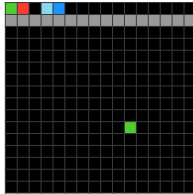

guess 2

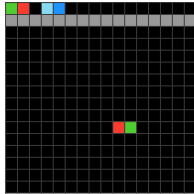

Supplement: supplementary_material [file 9356391f_solutions.pdf › CompressARC/results_for_the_blog_post/plots_evaluation/9356391f_solutions.pdf]

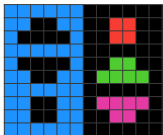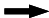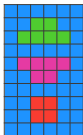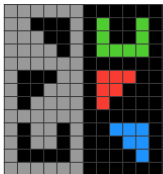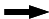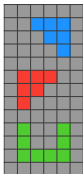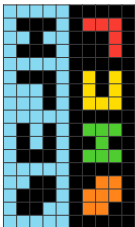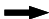

?

Supplement: supplementary_material [file 93b4f4b3_problem.pdf › CompressARC/results_for_the_blog_post/plots_evaluation/93b4f4b3_problem.pdf]

sample

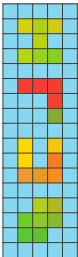

sample average

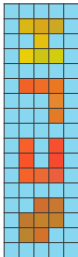

guess 1

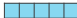

guess 2

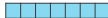

Supplement: supplementary_material [file 93b4f4b3_solutions.pdf › CompressARC/results_for_the_blog_post/plots_evaluation/93b4f4b3_solutions.pdf]

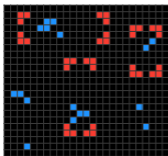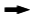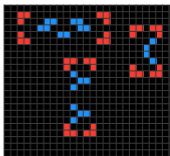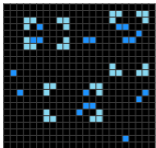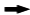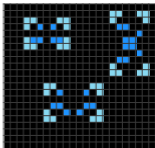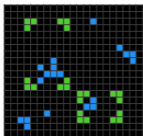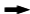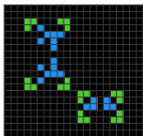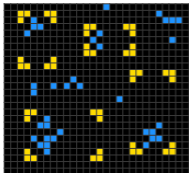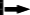

?

Supplement: supplementary_material [file 93c31fbe_problem.pdf › CompressARC/results_for_the_blog_post/plots_evaluation/93c31fbe_problem.pdf]

sample

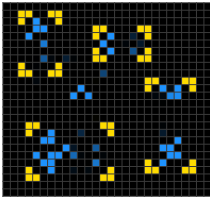

sample average

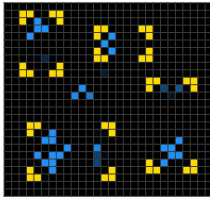

guess 1

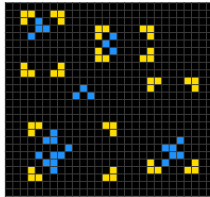

guess 2

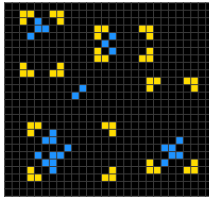

Supplement: supplementary_material [file 93c31fbe_solutions.pdf › CompressARC/results_for_the_blog_post/plots_evaluation/93c31fbe_solutions.pdf]

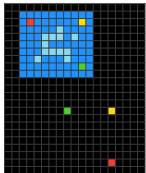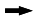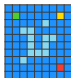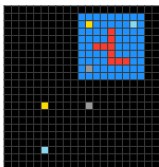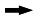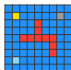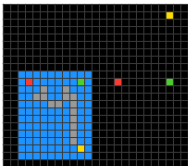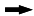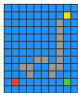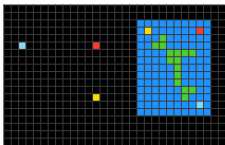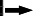

?

Supplement: supplementary_material [file 94133066_problem.pdf › CompressARC/results_for_the_blog_post/plots_evaluation/94133066_problem.pdf]

sample

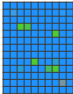

sample average

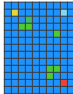

guess 1

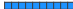

guess 2

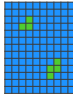

Supplement: supplementary_material [file 94133066_solutions.pdf › CompressARC/results_for_the_blog_post/plots_evaluation/94133066_solutions.pdf]

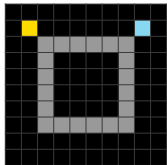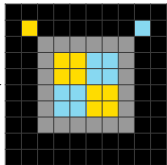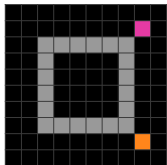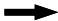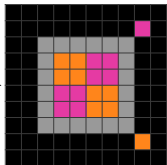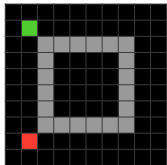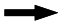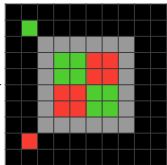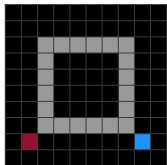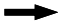

?

Supplement: supplementary_material [file 94414823_problem.pdf › CompressARC/results_for_the_blog_post/plots_evaluation/94414823_problem.pdf]

sample

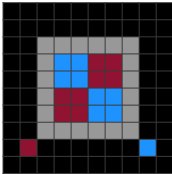

sample average

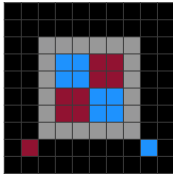

guess 1

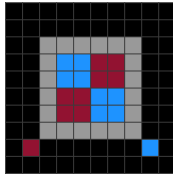

guess 2

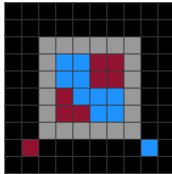

Supplement: supplementary_material [file 94414823_solutions.pdf › CompressARC/results_for_the_blog_post/plots_evaluation/94414823_solutions.pdf]

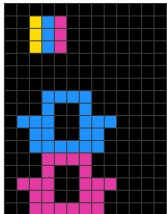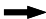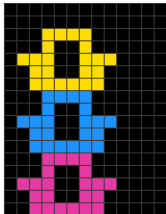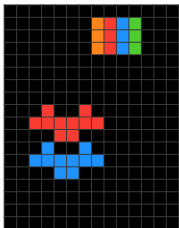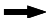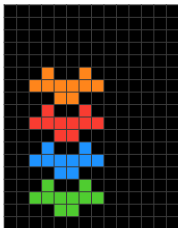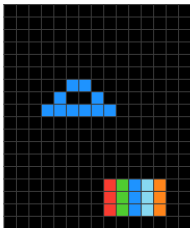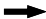

?

Supplement: supplementary_material [file 94be5b80_problem.pdf › CompressARC/results_for_the_blog_post/plots_evaluation/94be5b80_problem.pdf]

sample

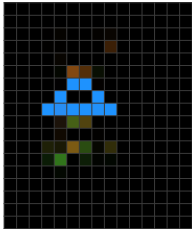

sample average

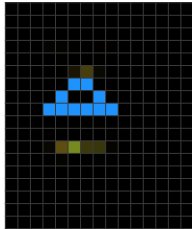

guess 1

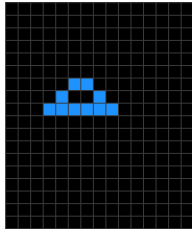

guess 2

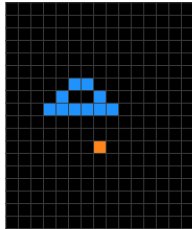

Supplement: supplementary_material [file 94be5b80_solutions.pdf › CompressARC/results_for_the_blog_post/plots_evaluation/94be5b80_solutions.pdf]

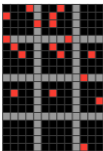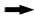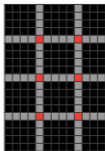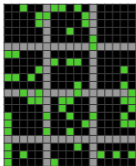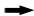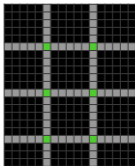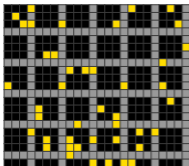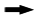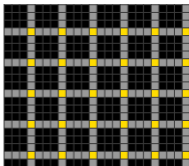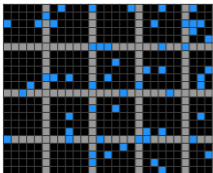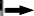

?

Supplement: supplementary_material [file 95a58926_problem.pdf › CompressARC/results_for_the_blog_post/plots_evaluation/95a58926_problem.pdf]

sample

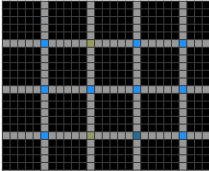

sample average

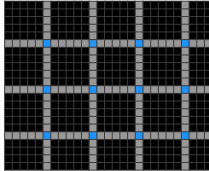

guess 1

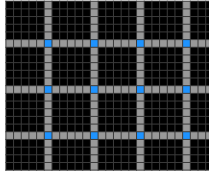

guess 2

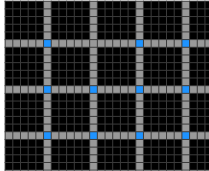

Supplement: supplementary_material [file 95a58926_solutions.pdf › CompressARC/results_for_the_blog_post/plots_evaluation/95a58926_solutions.pdf]

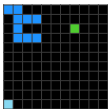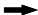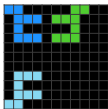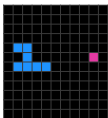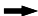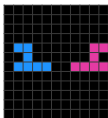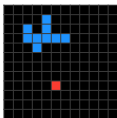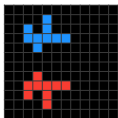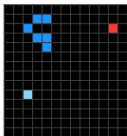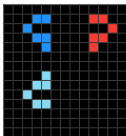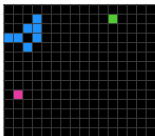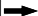

?

Supplement: supplementary_material [file 963f59bc_problem.pdf › CompressARC/results_for_the_blog_post/plots_evaluation/963f59bc_problem.pdf]

sample

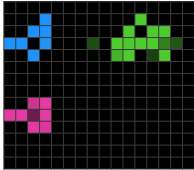

sample average

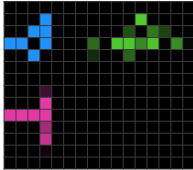

guess 1

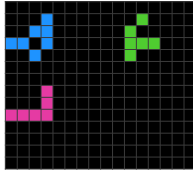

guess 2

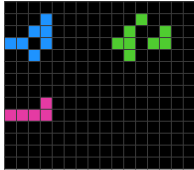

Supplement: supplementary_material [file 963f59bc_solutions.pdf › CompressARC/results_for_the_blog_post/plots_evaluation/963f59bc_solutions.pdf]

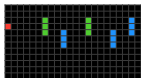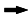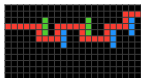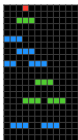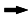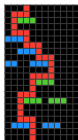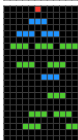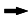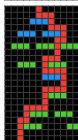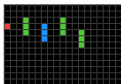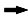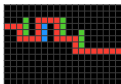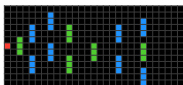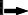

?

Supplement: supplementary_material [file 96a8c0cd_problem.pdf › CompressARC/results_for_the_blog_post/plots_evaluation/96a8c0cd_problem.pdf]

sample

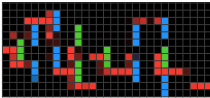

sample average

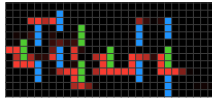

guess 1

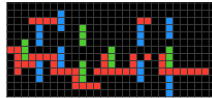

guess 2

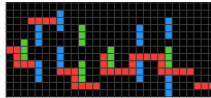

Supplement: supplementary_material [file 96a8c0cd_solutions.pdf › CompressARC/results_for_the_blog_post/plots_evaluation/96a8c0cd_solutions.pdf]

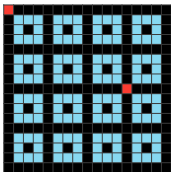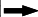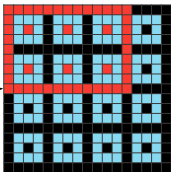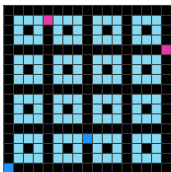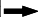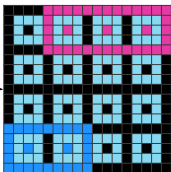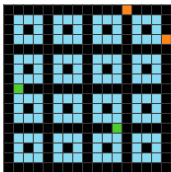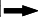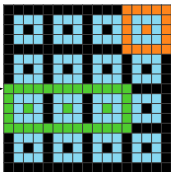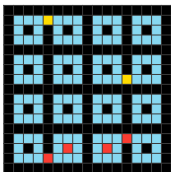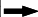

?

Supplement: supplementary_material [file 97239e3d_problem.pdf › CompressARC/results_for_the_blog_post/plots_evaluation/97239e3d_problem.pdf]

sample

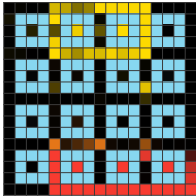

sample average

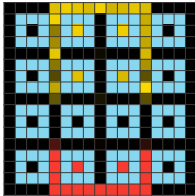

guess 1

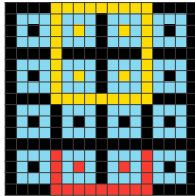

guess 2

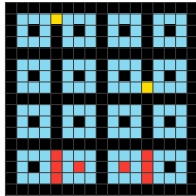

Supplement: supplementary_material [file 97239e3d_solutions.pdf › CompressARC/results_for_the_blog_post/plots_evaluation/97239e3d_solutions.pdf]

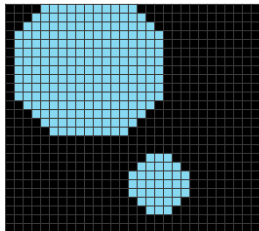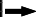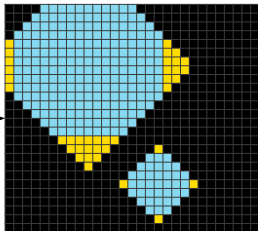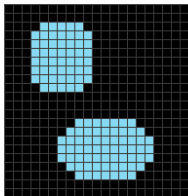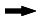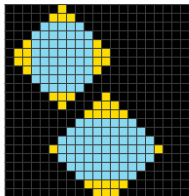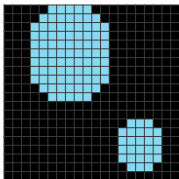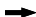

?

Supplement: supplementary_material [file 9772c176_problem.pdf › CompressARC/results_for_the_blog_post/plots_evaluation/9772c176_problem.pdf]

sample

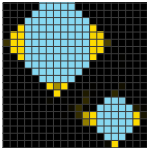

sample average

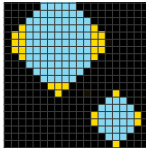

guess 1

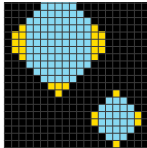

guess 2

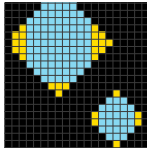

Supplement: supplementary_material [file 9772c176_solutions.pdf › CompressARC/results_for_the_blog_post/plots_evaluation/9772c176_solutions.pdf]

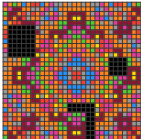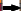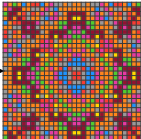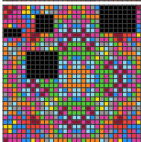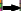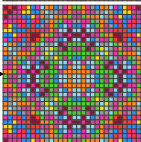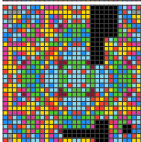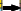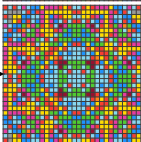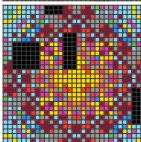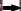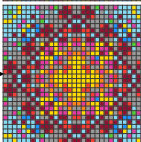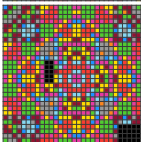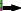

?

Supplement: supplementary_material [file 981571dc_problem.pdf › CompressARC/results_for_the_blog_post/plots_evaluation/981571dc_problem.pdf]

sample

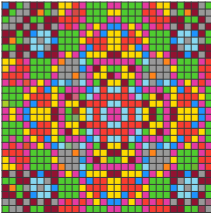

sample average

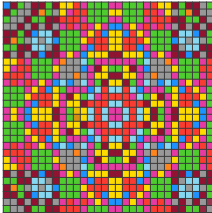

guess 1

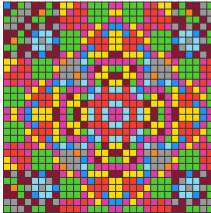

guess 2

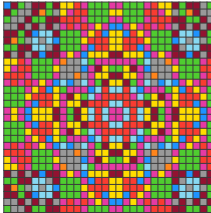

Supplement: supplementary_material [file 981571dc_solutions.pdf › CompressARC/results_for_the_blog_post/plots_evaluation/981571dc_solutions.pdf]

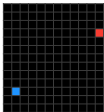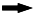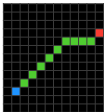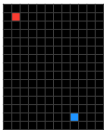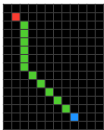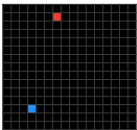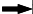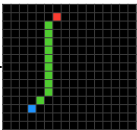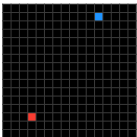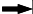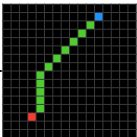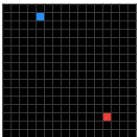

?

Supplement: supplementary_material [file 992798f6_problem.pdf › CompressARC/results_for_the_blog_post/plots_evaluation/992798f6_problem.pdf]

sample

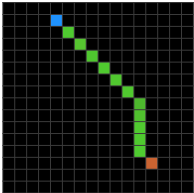

sample average

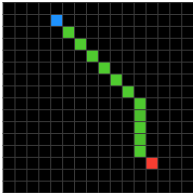

guess 1

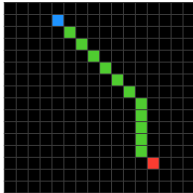

guess 2

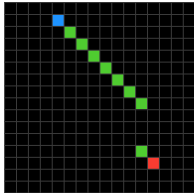

Supplement: supplementary_material [file 992798f6_solutions.pdf › CompressARC/results_for_the_blog_post/plots_evaluation/992798f6_solutions.pdf]

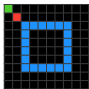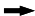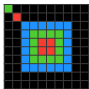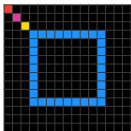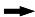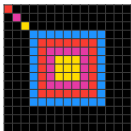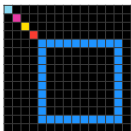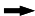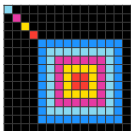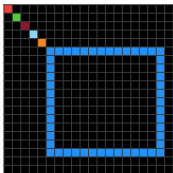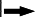

?

Supplement: supplementary_material [file 99306f82_problem.pdf › CompressARC/results_for_the_blog_post/plots_evaluation/99306f82_problem.pdf]

sample

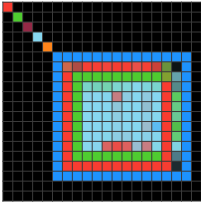

sample average

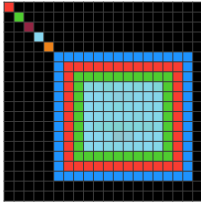

guess 1

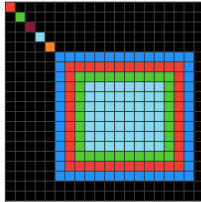

guess 2

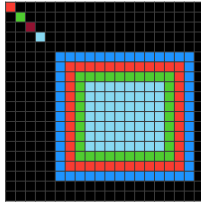

Supplement: supplementary_material [file 99306f82_solutions.pdf › CompressARC/results_for_the_blog_post/plots_evaluation/99306f82_solutions.pdf]

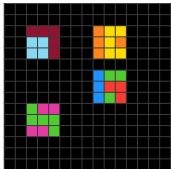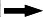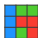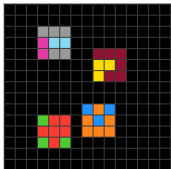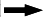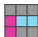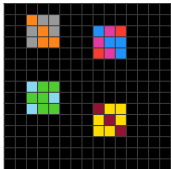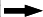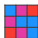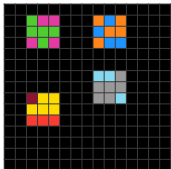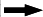

?

Supplement: supplementary_material [file 9a4bb226_problem.pdf › CompressARC/results_for_the_blog_post/plots_evaluation/9a4bb226_problem.pdf]

sample

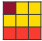

sample average

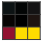

guess 1

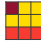

guess 2

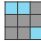

Supplement: supplementary_material [file 9a4bb226_solutions.pdf › CompressARC/results_for_the_blog_post/plots_evaluation/9a4bb226_solutions.pdf]

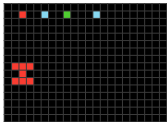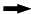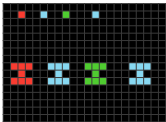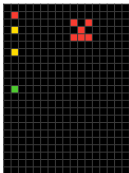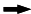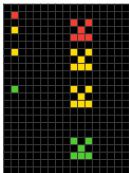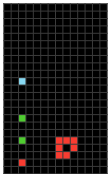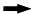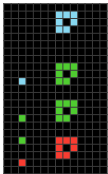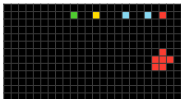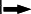

?

Supplement: supplementary_material [file 9b2a60aa_problem.pdf › CompressARC/results_for_the_blog_post/plots_evaluation/9b2a60aa_problem.pdf]

sample

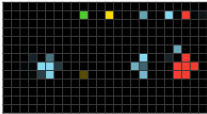

sample average

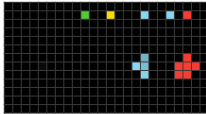

guess 1

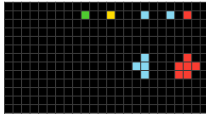

guess 2

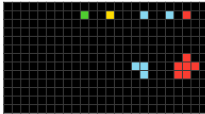

Supplement: supplementary_material [file 9b2a60aa_solutions.pdf › CompressARC/results_for_the_blog_post/plots_evaluation/9b2a60aa_solutions.pdf]

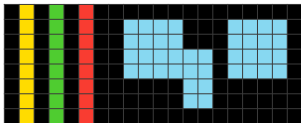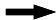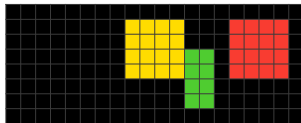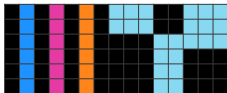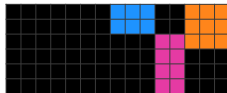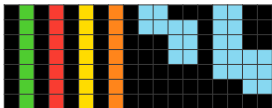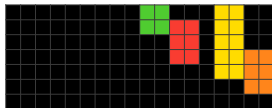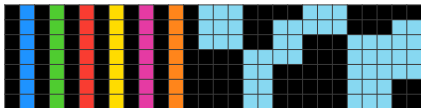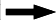

?

Supplement: supplementary_material [file 9b365c51_problem.pdf › CompressARC/results_for_the_blog_post/plots_evaluation/9b365c51_problem.pdf]

sample

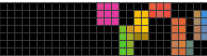

sample average

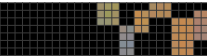

guess 1

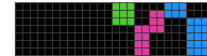

guess 2

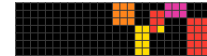

Supplement: supplementary_material [file 9b365c51_solutions.pdf › CompressARC/results_for_the_blog_post/plots_evaluation/9b365c51_solutions.pdf]

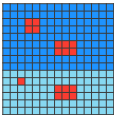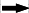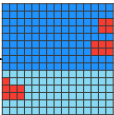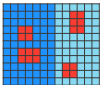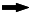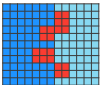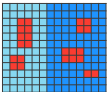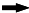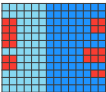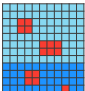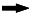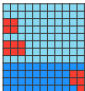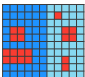

?

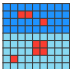

?

Supplement: supplementary_material [file 9b4c17c4_problem.pdf › CompressARC/results_for_the_blog_post/plots_evaluation/9b4c17c4_problem.pdf]

sample

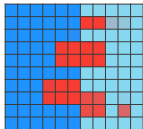

sample average

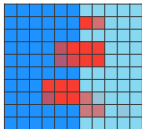

guess 1

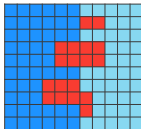

guess 2

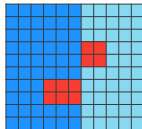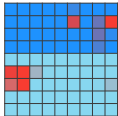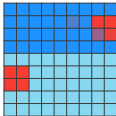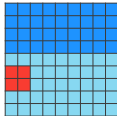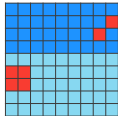

Supplement: supplementary_material [file 9b4c17c4_solutions.pdf › CompressARC/results_for_the_blog_post/plots_evaluation/9b4c17c4_solutions.pdf]

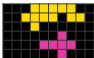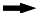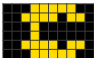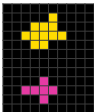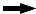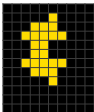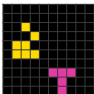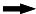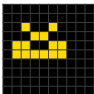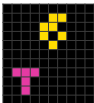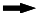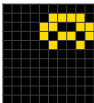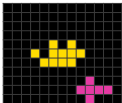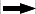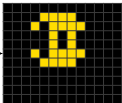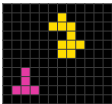

?

Supplement: supplementary_material [file 9bebae7a_problem.pdf › CompressARC/results_for_the_blog_post/plots_evaluation/9bebae7a_problem.pdf]

sample

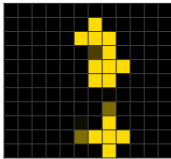

sample average

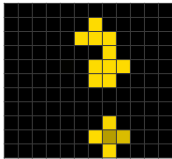

guess 1

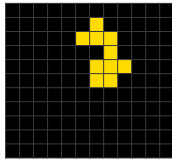

guess 2

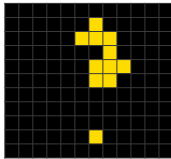

Supplement: supplementary_material [file 9bebae7a_solutions.pdf › CompressARC/results_for_the_blog_post/plots_evaluation/9bebae7a_solutions.pdf]

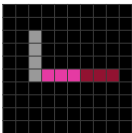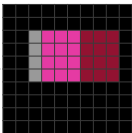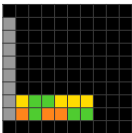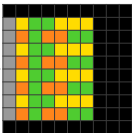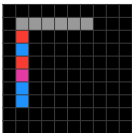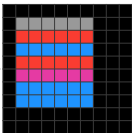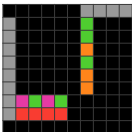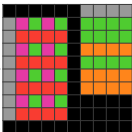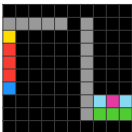

?

Supplement: supplementary_material [file 9c1e755f_problem.pdf › CompressARC/results_for_the_blog_post/plots_evaluation/9c1e755f_problem.pdf]

sample

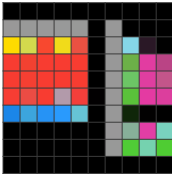

sample average

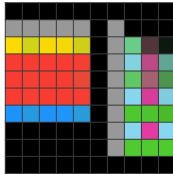

guess 1

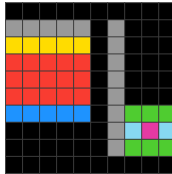

guess 2

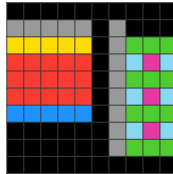

Supplement: supplementary_material [file 9c1e755f_solutions.pdf › CompressARC/results_for_the_blog_post/plots_evaluation/9c1e755f_solutions.pdf]

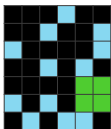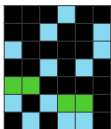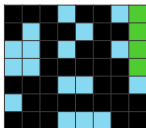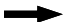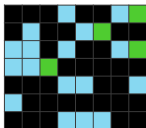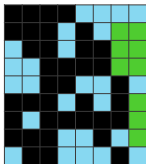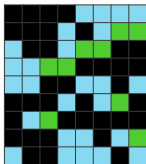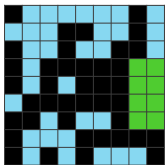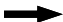

?

Supplement: supplementary_material [file 9c56f360_problem.pdf › CompressARC/results_for_the_blog_post/plots_evaluation/9c56f360_problem.pdf]

sample

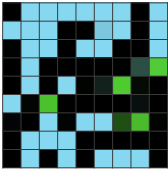

sample average

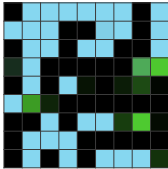

guess 1

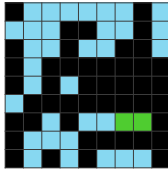

guess 2

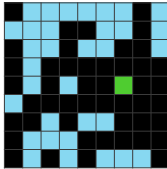

Supplement: supplementary_material [file 9c56f360_solutions.pdf › CompressARC/results_for_the_blog_post/plots_evaluation/9c56f360_solutions.pdf]

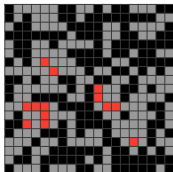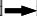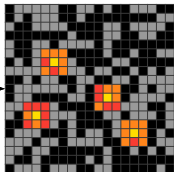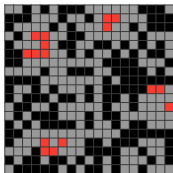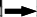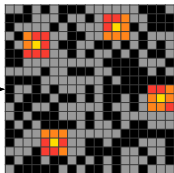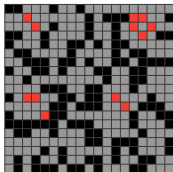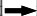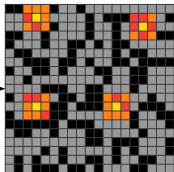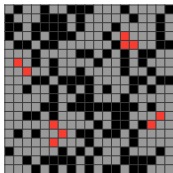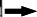

?

Supplement: supplementary_material [file 9caba7c3_problem.pdf › CompressARC/results_for_the_blog_post/plots_evaluation/9caba7c3_problem.pdf]
