# Supplementary material (part 7 of 17)
Source: ML conference proceedings conference paper supplement (https://openreview.net/forum?id=jLC662Yo5h)

sample

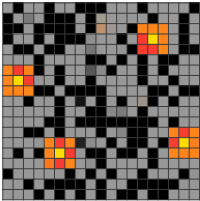

sample average

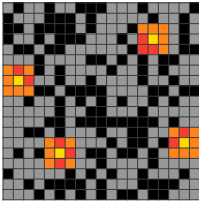

guess 1

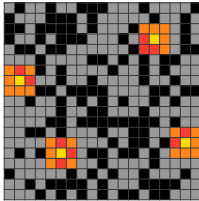

guess 2

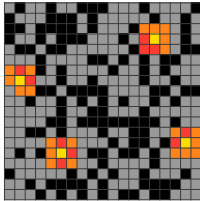

Supplement: supplementary_material [file 9caba7c3_solutions.pdf › CompressARC/results_for_the_blog_post/plots_evaluation/9caba7c3_solutions.pdf]

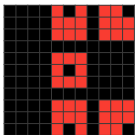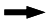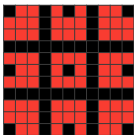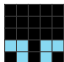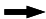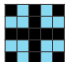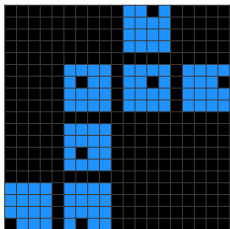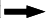

?

Supplement: supplementary_material [file 9ddd00f0_problem.pdf › CompressARC/results_for_the_blog_post/plots_evaluation/9ddd00f0_problem.pdf]

sample

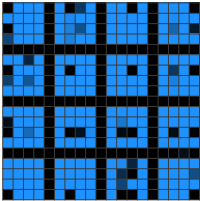

sample average

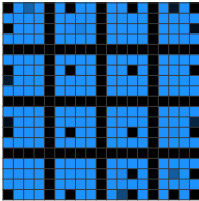

guess 1

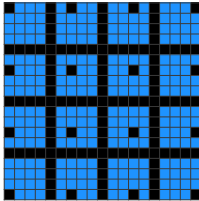

guess 2

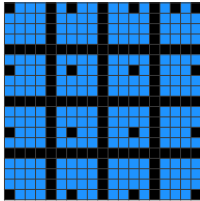

Supplement: supplementary_material [file 9ddd00f0_solutions.pdf › CompressARC/results_for_the_blog_post/plots_evaluation/9ddd00f0_solutions.pdf]

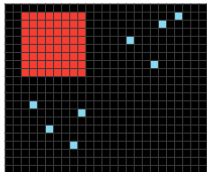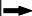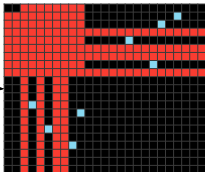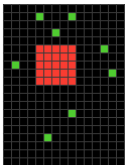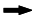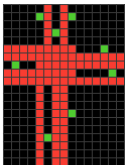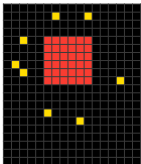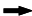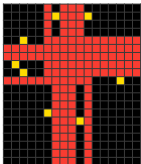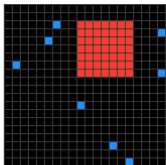

?

Supplement: supplementary_material [file 9def23fe_problem.pdf › CompressARC/results_for_the_blog_post/plots_evaluation/9def23fe_problem.pdf]

sample

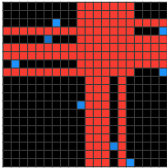

sample average

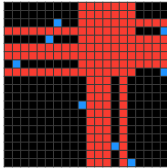

guess 1

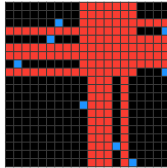

guess 2

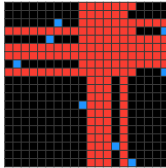

Supplement: supplementary_material [file 9def23fe_solutions.pdf › CompressARC/results_for_the_blog_post/plots_evaluation/9def23fe_solutions.pdf]

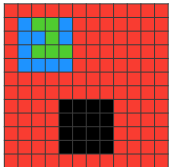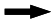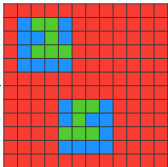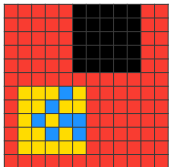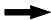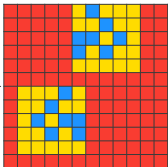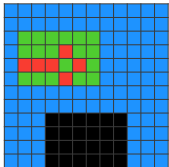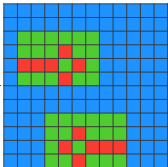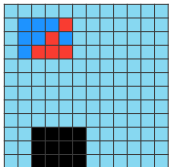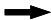

?

Supplement: supplementary_material [file 9f27f097_problem.pdf › CompressARC/results_for_the_blog_post/plots_evaluation/9f27f097_problem.pdf]

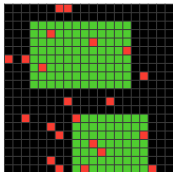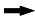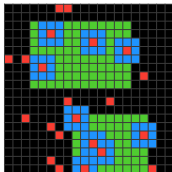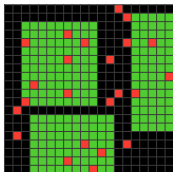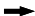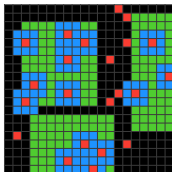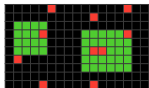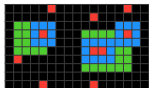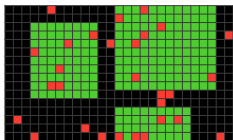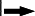

?

Supplement: supplementary_material [file a04b2602_problem.pdf › CompressARC/results_for_the_blog_post/plots_evaluation/a04b2602_problem.pdf]

sample

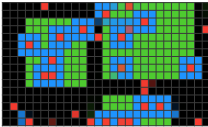

sample average

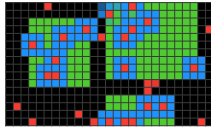

guess 1

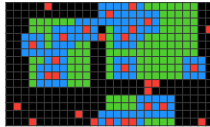

guess 2

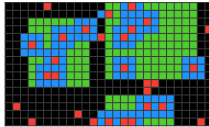

Supplement: supplementary_material [file a04b2602_solutions.pdf › CompressARC/results_for_the_blog_post/plots_evaluation/a04b2602_solutions.pdf]

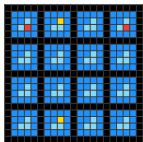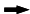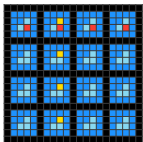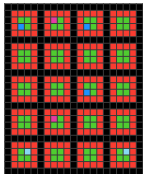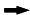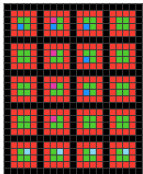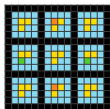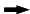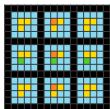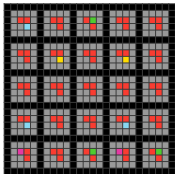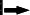

?

Supplement: supplementary_material [file a096bf4d_problem.pdf › CompressARC/results_for_the_blog_post/plots_evaluation/a096bf4d_problem.pdf]

sample

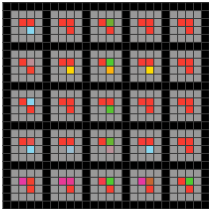

sample average

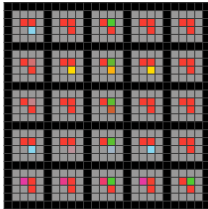

guess 1

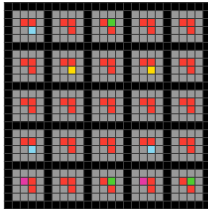

guess 2

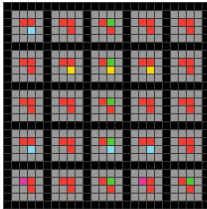

Supplement: supplementary_material [file a096bf4d_solutions.pdf › CompressARC/results_for_the_blog_post/plots_evaluation/a096bf4d_solutions.pdf]

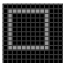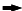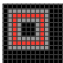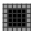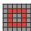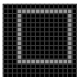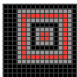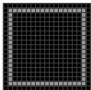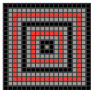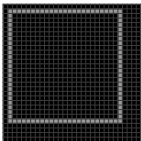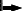

?

Supplement: supplementary_material [file a3f84088_problem.pdf › CompressARC/results_for_the_blog_post/plots_evaluation/a3f84088_problem.pdf]

sample

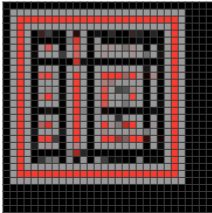

sample average

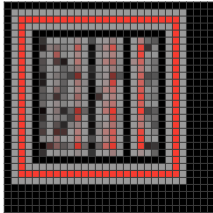

guess 1

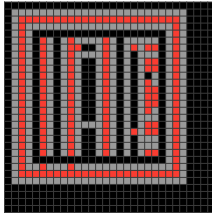

guess 2

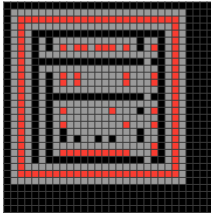

Supplement: supplementary_material [file a3f84088_solutions.pdf › CompressARC/results_for_the_blog_post/plots_evaluation/a3f84088_solutions.pdf]

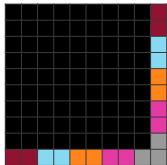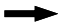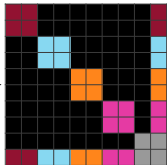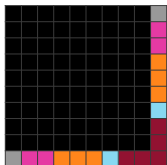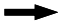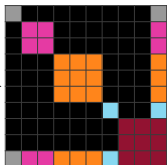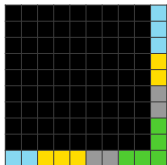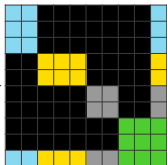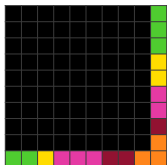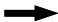

?

Supplement: supplementary_material [file a406ac07_problem.pdf › CompressARC/results_for_the_blog_post/plots_evaluation/a406ac07_problem.pdf]

sample

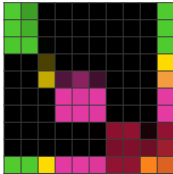

sample average

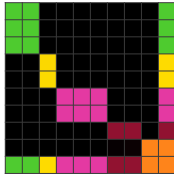

guess 1

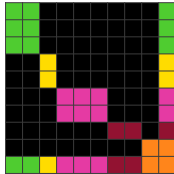

guess 2

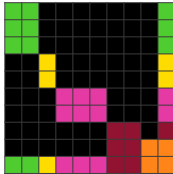

Supplement: supplementary_material [file a406ac07_solutions.pdf › CompressARC/results_for_the_blog_post/plots_evaluation/a406ac07_solutions.pdf]

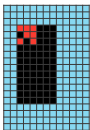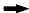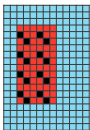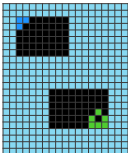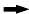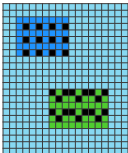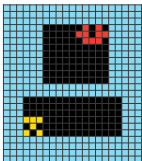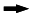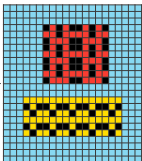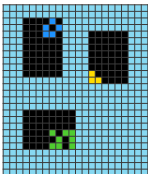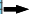

?

Supplement: supplementary_material [file a57f2f04_problem.pdf › CompressARC/results_for_the_blog_post/plots_evaluation/a57f2f04_problem.pdf]

sample

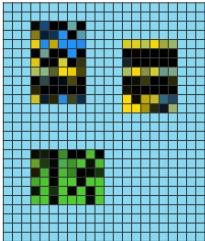

sample average

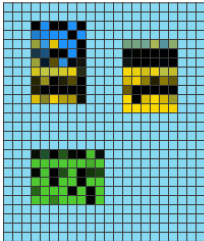

guess 1

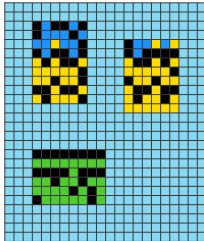

guess 2

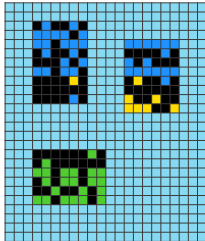

Supplement: supplementary_material [file a57f2f04_solutions.pdf › CompressARC/results_for_the_blog_post/plots_evaluation/a57f2f04_solutions.pdf]

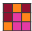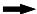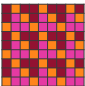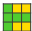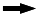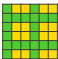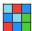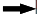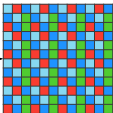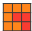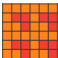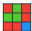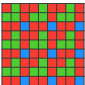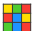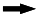

?

Supplement: supplementary_material [file a59b95c0_problem.pdf › CompressARC/results_for_the_blog_post/plots_evaluation/a59b95c0_problem.pdf]

sample

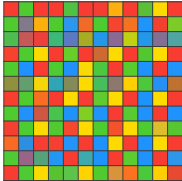

sample average

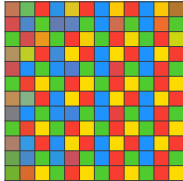

guess 1

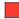

guess 2

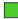

Supplement: supplementary_material [file a59b95c0_solutions.pdf › CompressARC/results_for_the_blog_post/plots_evaluation/a59b95c0_solutions.pdf]

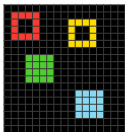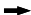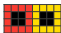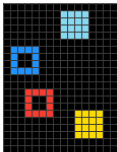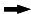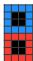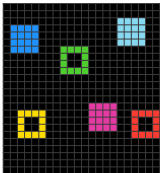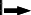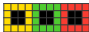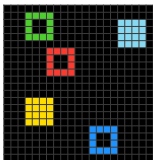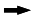

?

Supplement: supplementary_material [file a680ac02_problem.pdf › CompressARC/results_for_the_blog_post/plots_evaluation/a680ac02_problem.pdf]

sample

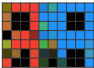

sample average

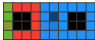

guess 1

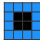

guess 2

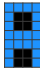

Supplement: supplementary_material [file a680ac02_solutions.pdf › CompressARC/results_for_the_blog_post/plots_evaluation/a680ac02_solutions.pdf]

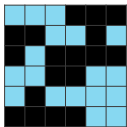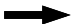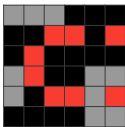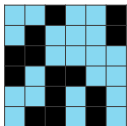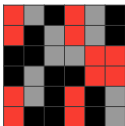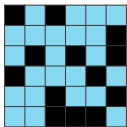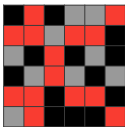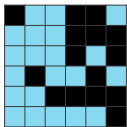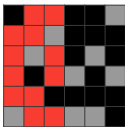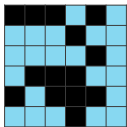

?

Supplement: supplementary_material [file a8610ef7_problem.pdf › CompressARC/results_for_the_blog_post/plots_evaluation/a8610ef7_problem.pdf]

sample

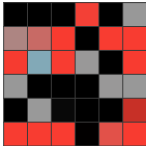

sample average

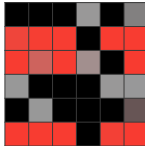

guess 1

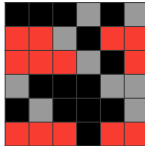

guess 2

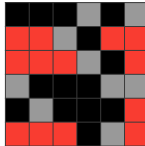

Supplement: supplementary_material [file a8610ef7_solutions.pdf › CompressARC/results_for_the_blog_post/plots_evaluation/a8610ef7_solutions.pdf]

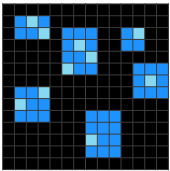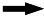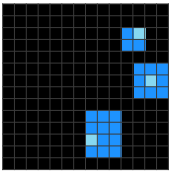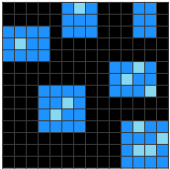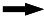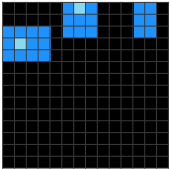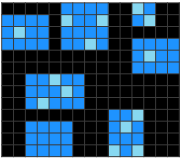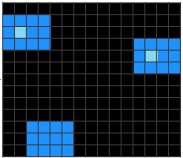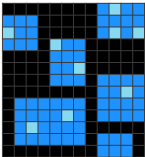

?

Supplement: supplementary_material [file a934301b_problem.pdf › CompressARC/results_for_the_blog_post/plots_evaluation/a934301b_problem.pdf]

sample

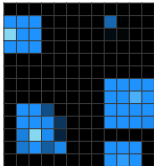

sample average

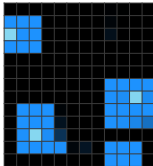

guess 1

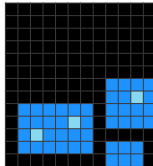

guess 2

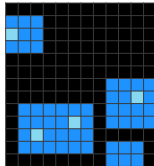

Supplement: supplementary_material [file a934301b_solutions.pdf › CompressARC/results_for_the_blog_post/plots_evaluation/a934301b_solutions.pdf]

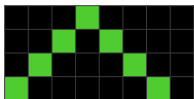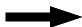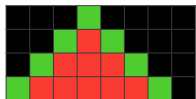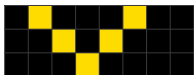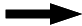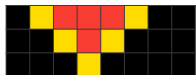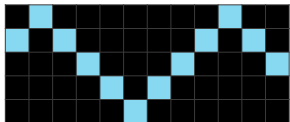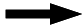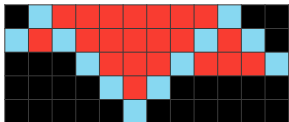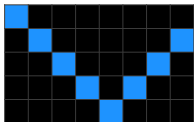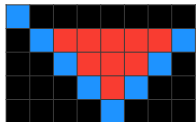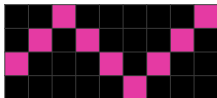

?

Supplement: supplementary_material [file aa18de87_problem.pdf › CompressARC/results_for_the_blog_post/plots_evaluation/aa18de87_problem.pdf]

sample

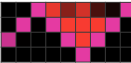

sample average

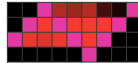

guess 1

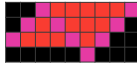

guess 2

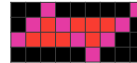

Supplement: supplementary_material [file aa18de87_solutions.pdf › CompressARC/results_for_the_blog_post/plots_evaluation/aa18de87_solutions.pdf]

sample

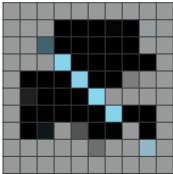

sample average

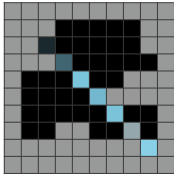

guess 1

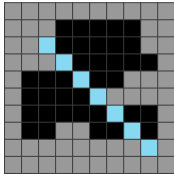

guess 2

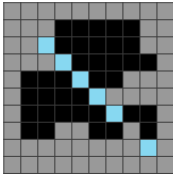

Supplement: supplementary_material [file aa300dc3_solutions.pdf › CompressARC/results_for_the_blog_post/plots_evaluation/aa300dc3_solutions.pdf]

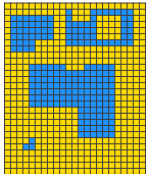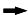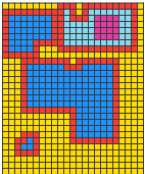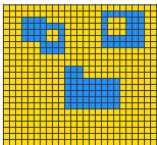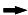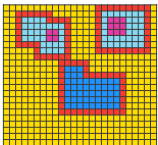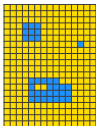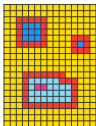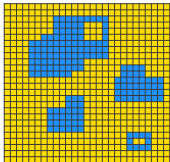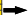

?

Supplement: supplementary_material [file aa4ec2a5_problem.pdf › CompressARC/results_for_the_blog_post/plots_evaluation/aa4ec2a5_problem.pdf]

sample

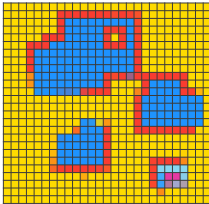

sample average

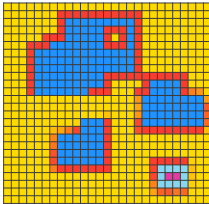

guess 1

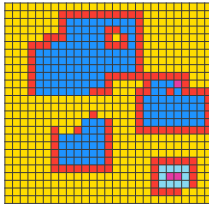

guess 2

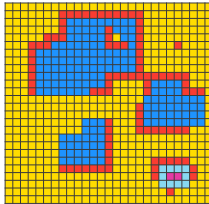

Supplement: supplementary_material [file aa4ec2a5_solutions.pdf › CompressARC/results_for_the_blog_post/plots_evaluation/aa4ec2a5_solutions.pdf]

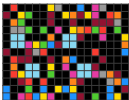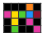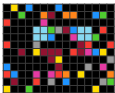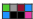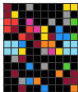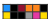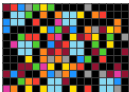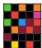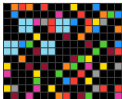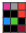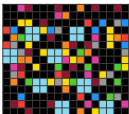

?

Supplement: supplementary_material [file aab50785_problem.pdf › CompressARC/results_for_the_blog_post/plots_evaluation/aab50785_problem.pdf]

sample

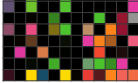

sample average

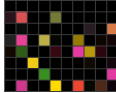

guess 1

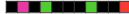

guess 2

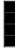

Supplement: supplementary_material [file aab50785_solutions.pdf › CompressARC/results_for_the_blog_post/plots_evaluation/aab50785_solutions.pdf]

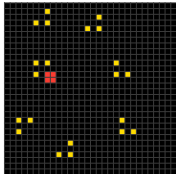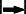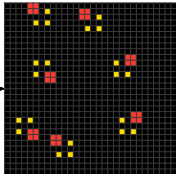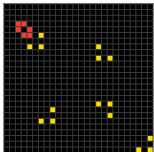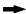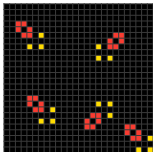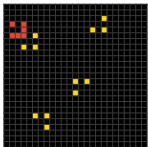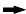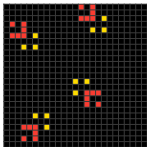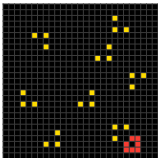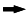

?

Supplement: supplementary_material [file ac0c5833_problem.pdf › CompressARC/results_for_the_blog_post/plots_evaluation/ac0c5833_problem.pdf]

sample

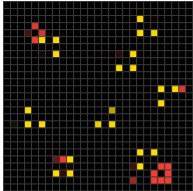

sample average

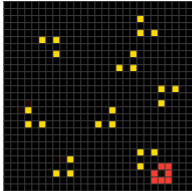

guess 1

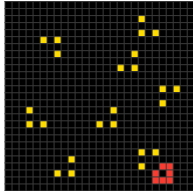

guess 2

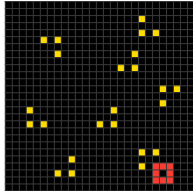

Supplement: supplementary_material [file ac0c5833_solutions.pdf › CompressARC/results_for_the_blog_post/plots_evaluation/ac0c5833_solutions.pdf]

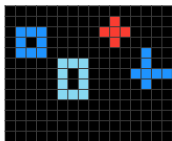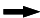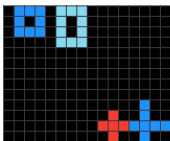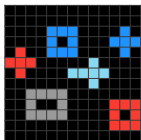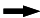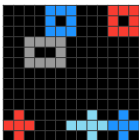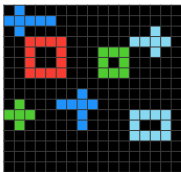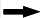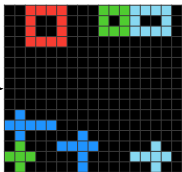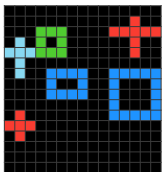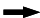

?

Supplement: supplementary_material [file ac2e8ecf_problem.pdf › CompressARC/results_for_the_blog_post/plots_evaluation/ac2e8ecf_problem.pdf]

sample

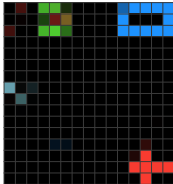

sample average

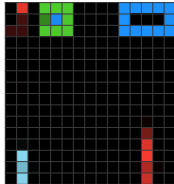

guess 1

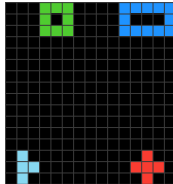

guess 2

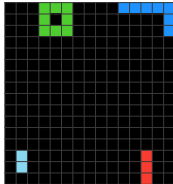

Supplement: supplementary_material [file ac2e8ecf_solutions.pdf › CompressARC/results_for_the_blog_post/plots_evaluation/ac2e8ecf_solutions.pdf]

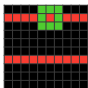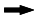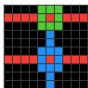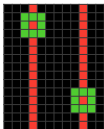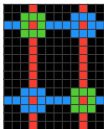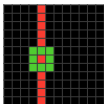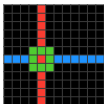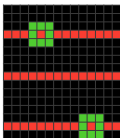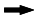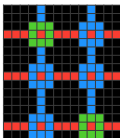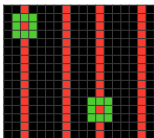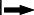

?

Supplement: supplementary_material [file ac3e2b04_problem.pdf › CompressARC/results_for_the_blog_post/plots_evaluation/ac3e2b04_problem.pdf]

sample

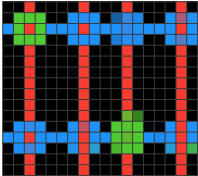

sample average

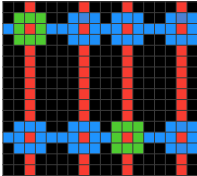

guess 1

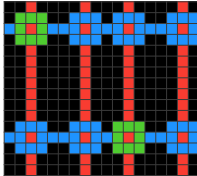

guess 2

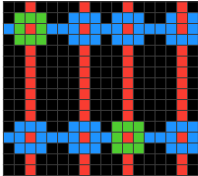

Supplement: supplementary_material [file ac3e2b04_solutions.pdf › CompressARC/results_for_the_blog_post/plots_evaluation/ac3e2b04_solutions.pdf]

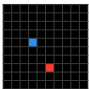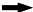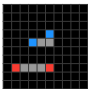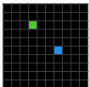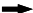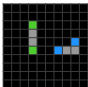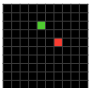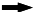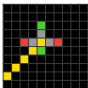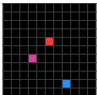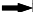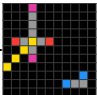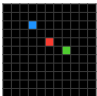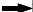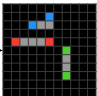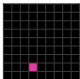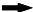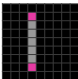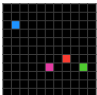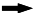

?

Supplement: supplementary_material [file ac605cbb_problem.pdf › CompressARC/results_for_the_blog_post/plots_evaluation/ac605cbb_problem.pdf]

sample

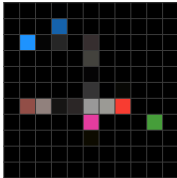

sample average

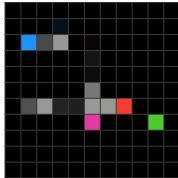

guess 1

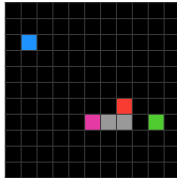

guess 2

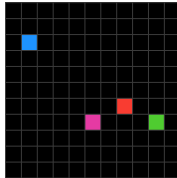

Supplement: supplementary_material [file ac605cbb_solutions.pdf › CompressARC/results_for_the_blog_post/plots_evaluation/ac605cbb_solutions.pdf]

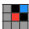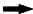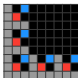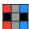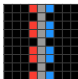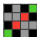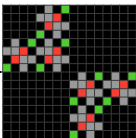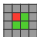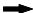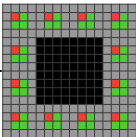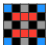

?

Supplement: supplementary_material [file ad7e01d0_problem.pdf › CompressARC/results_for_the_blog_post/plots_evaluation/ad7e01d0_problem.pdf]

sample

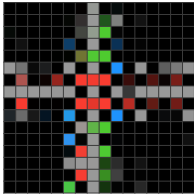

sample average

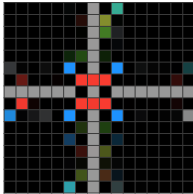

guess 1

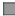

guess 2

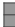

Supplement: supplementary_material [file ad7e01d0_solutions.pdf › CompressARC/results_for_the_blog_post/plots_evaluation/ad7e01d0_solutions.pdf]

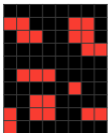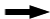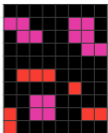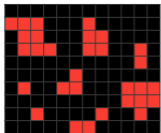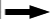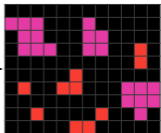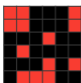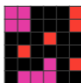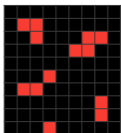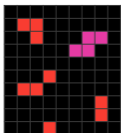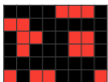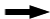

?

Supplement: supplementary_material [file ae58858e_problem.pdf › CompressARC/results_for_the_blog_post/plots_evaluation/ae58858e_problem.pdf]

sample

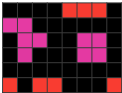

sample average

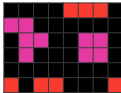

guess 1

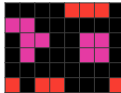

guess 2

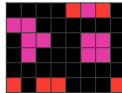

Supplement: supplementary_material [file ae58858e_solutions.pdf › CompressARC/results_for_the_blog_post/plots_evaluation/ae58858e_solutions.pdf]

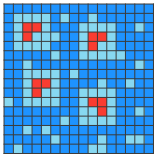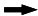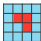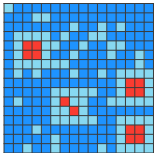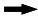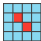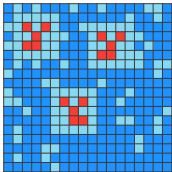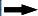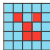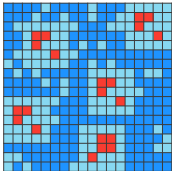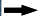

?

Supplement: supplementary_material [file aee291af_problem.pdf › CompressARC/results_for_the_blog_post/plots_evaluation/aee291af_problem.pdf]

sample

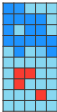

sample average

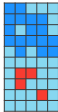

guess 1

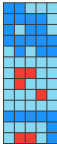

guess 2

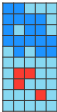

Supplement: supplementary_material [file aee291af_solutions.pdf › CompressARC/results_for_the_blog_post/plots_evaluation/aee291af_solutions.pdf]

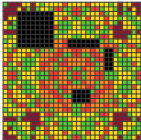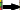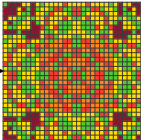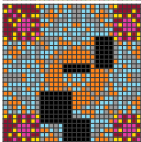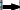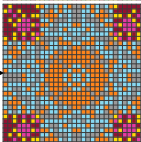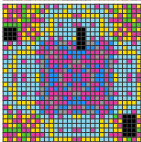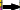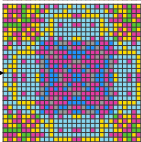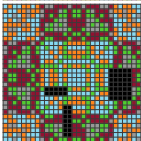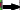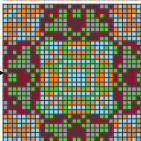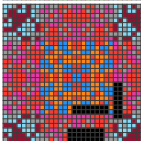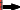

?

Supplement: supplementary_material [file af22c60d_problem.pdf › CompressARC/results_for_the_blog_post/plots_evaluation/af22c60d_problem.pdf]

sample

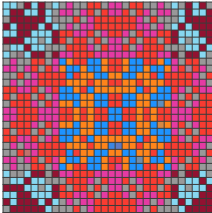

sample average

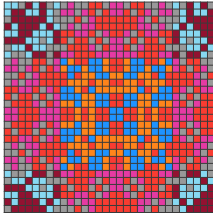

guess 1

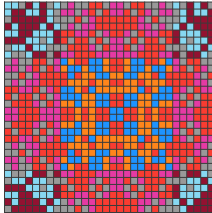

guess 2

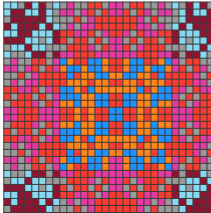

Supplement: supplementary_material [file af22c60d_solutions.pdf › CompressARC/results_for_the_blog_post/plots_evaluation/af22c60d_solutions.pdf]

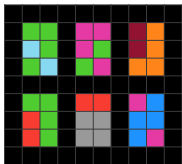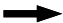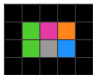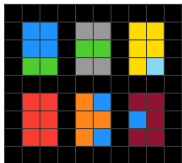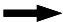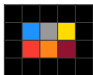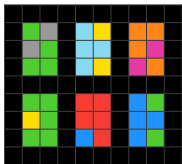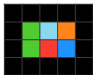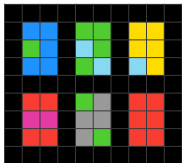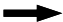

?

Supplement: supplementary_material [file af24b4cc_problem.pdf › CompressARC/results_for_the_blog_post/plots_evaluation/af24b4cc_problem.pdf]

sample

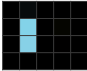

sample average

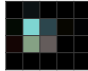

guess 1

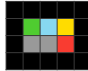

guess 2

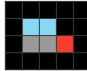

Supplement: supplementary_material [file af24b4cc_solutions.pdf › CompressARC/results_for_the_blog_post/plots_evaluation/af24b4cc_solutions.pdf]

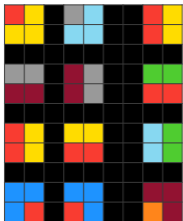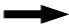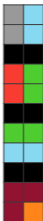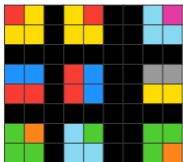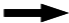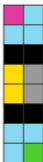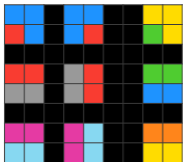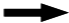

?

Supplement: supplementary_material [file b0722778_problem.pdf › CompressARC/results_for_the_blog_post/plots_evaluation/b0722778_problem.pdf]

sample

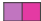

sample average

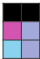

guess 1

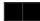

guess 2

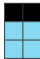

Supplement: supplementary_material [file b0722778_solutions.pdf › CompressARC/results_for_the_blog_post/plots_evaluation/b0722778_solutions.pdf]

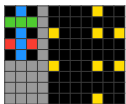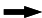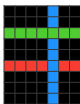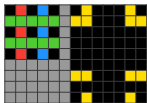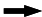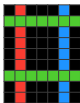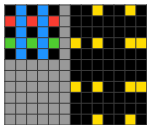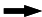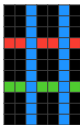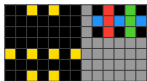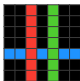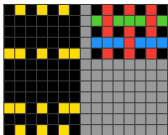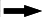

?

Supplement: supplementary_material [file b0f4d537_problem.pdf › CompressARC/results_for_the_blog_post/plots_evaluation/b0f4d537_problem.pdf]

sample

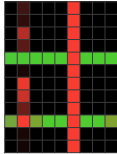

sample average

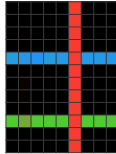

guess 1

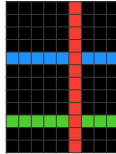

guess 2

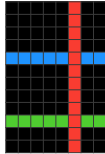

Supplement: supplementary_material [file b0f4d537_solutions.pdf › CompressARC/results_for_the_blog_post/plots_evaluation/b0f4d537_solutions.pdf]

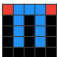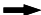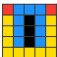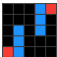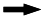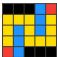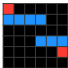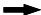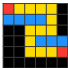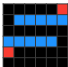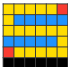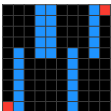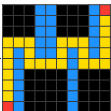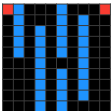

?

Supplement: supplementary_material [file b15fca0b_problem.pdf › CompressARC/results_for_the_blog_post/plots_evaluation/b15fca0b_problem.pdf]

sample

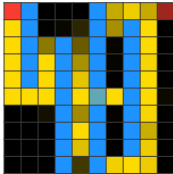

sample average

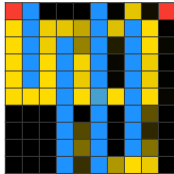

guess 1

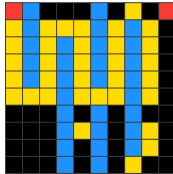

guess 2

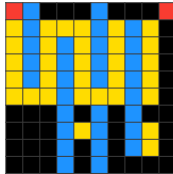

Supplement: supplementary_material [file b15fca0b_solutions.pdf › CompressARC/results_for_the_blog_post/plots_evaluation/b15fca0b_solutions.pdf]

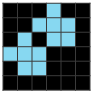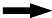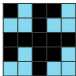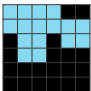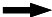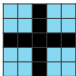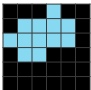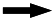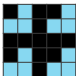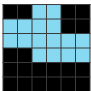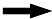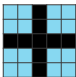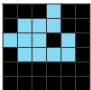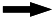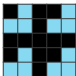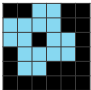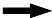

?

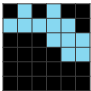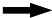

?

Supplement: supplementary_material [file b1fc8b8e_problem.pdf › CompressARC/results_for_the_blog_post/plots_evaluation/b1fc8b8e_problem.pdf]

sample

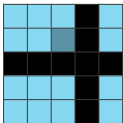

sample average

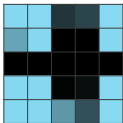

guess 1

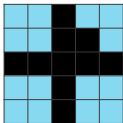

guess 2

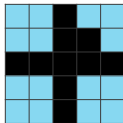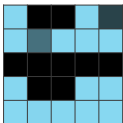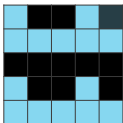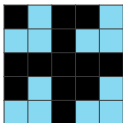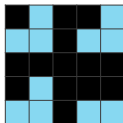

Supplement: supplementary_material [file b1fc8b8e_solutions.pdf › CompressARC/results_for_the_blog_post/plots_evaluation/b1fc8b8e_solutions.pdf]

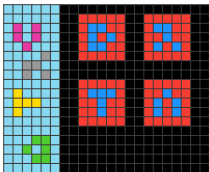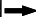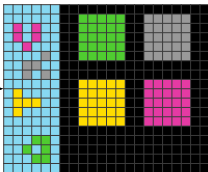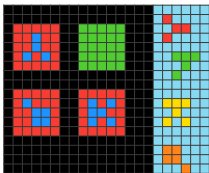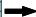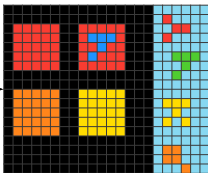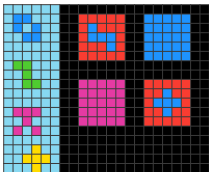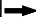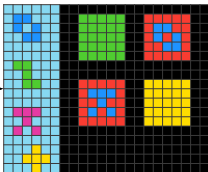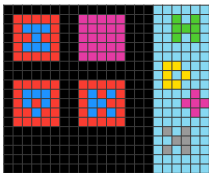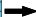

?

Supplement: supplementary_material [file b20f7c8b_problem.pdf › CompressARC/results_for_the_blog_post/plots_evaluation/b20f7c8b_problem.pdf]

sample

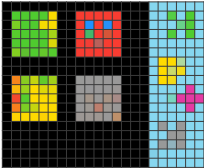

sample average

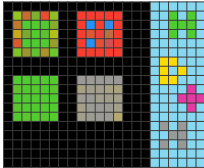

guess 1

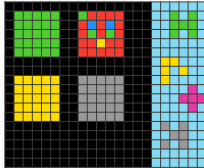

guess 2

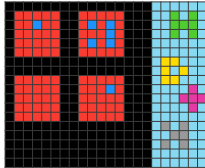

Supplement: supplementary_material [file b20f7c8b_solutions.pdf › CompressARC/results_for_the_blog_post/plots_evaluation/b20f7c8b_solutions.pdf]

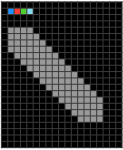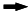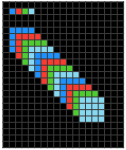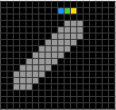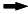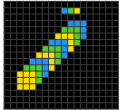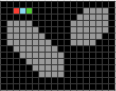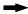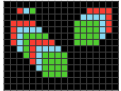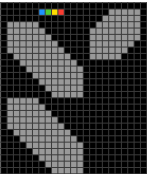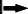

?

Supplement: supplementary_material [file b457fec5_problem.pdf › CompressARC/results_for_the_blog_post/plots_evaluation/b457fec5_problem.pdf]

sample

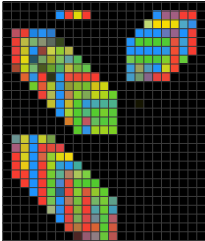

sample average

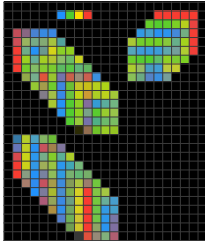

guess 1

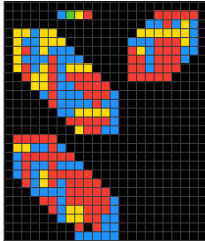

guess 2

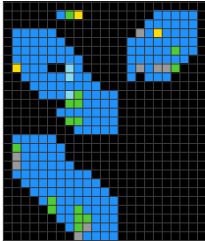

Supplement: supplementary_material [file b457fec5_solutions.pdf › CompressARC/results_for_the_blog_post/plots_evaluation/b457fec5_solutions.pdf]

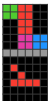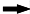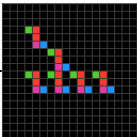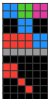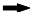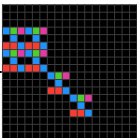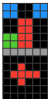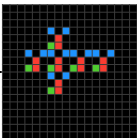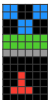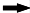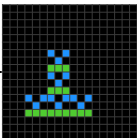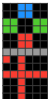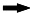

?

Supplement: supplementary_material [file b4a43f3b_problem.pdf › CompressARC/results_for_the_blog_post/plots_evaluation/b4a43f3b_problem.pdf]

sample

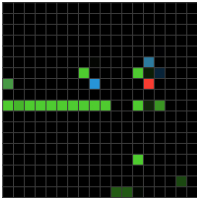

sample average

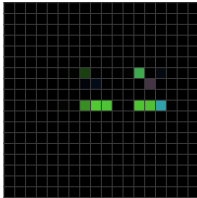

guess 1

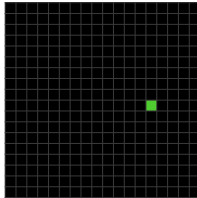

guess 2

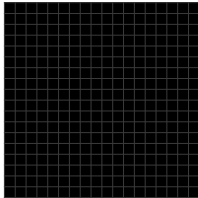

Supplement: supplementary_material [file b4a43f3b_solutions.pdf › CompressARC/results_for_the_blog_post/plots_evaluation/b4a43f3b_solutions.pdf]

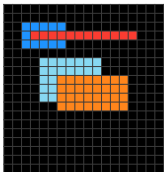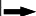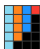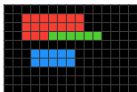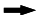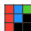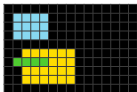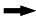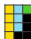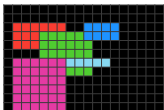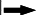

?

Supplement: supplementary_material [file b7999b51_problem.pdf › CompressARC/results_for_the_blog_post/plots_evaluation/b7999b51_problem.pdf]

sample

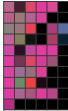

sample average

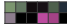

guess 1

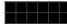

guess 2

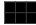

Supplement: supplementary_material [file b7999b51_solutions.pdf › CompressARC/results_for_the_blog_post/plots_evaluation/b7999b51_solutions.pdf]

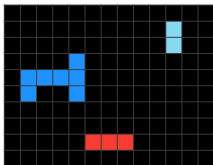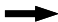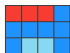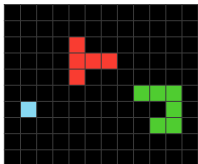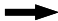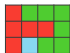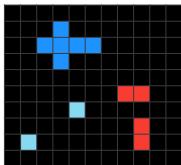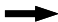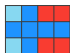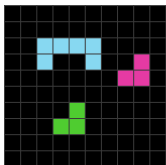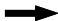

?

Supplement: supplementary_material [file b7cb93ac_problem.pdf › CompressARC/results_for_the_blog_post/plots_evaluation/b7cb93ac_problem.pdf]

sample

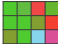

sample average

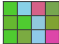

guess 1

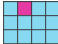

guess 2

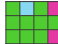

Supplement: supplementary_material [file b7cb93ac_solutions.pdf › CompressARC/results_for_the_blog_post/plots_evaluation/b7cb93ac_solutions.pdf]

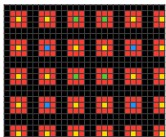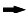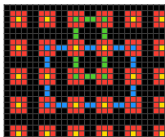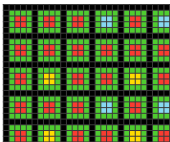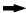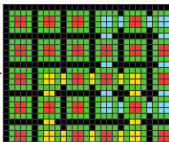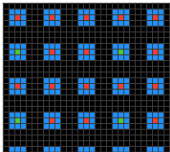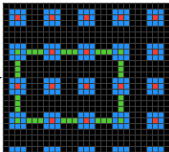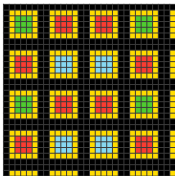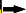

?

Supplement: supplementary_material [file b7f8a4d8_problem.pdf › CompressARC/results_for_the_blog_post/plots_evaluation/b7f8a4d8_problem.pdf]

sample

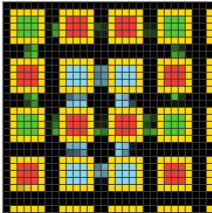

sample average

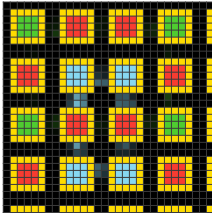

guess 1

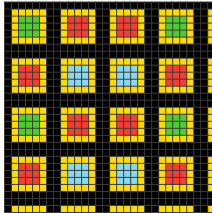

guess 2

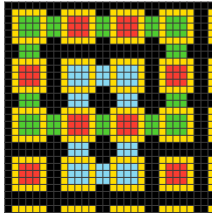

Supplement: supplementary_material [file b7f8a4d8_solutions.pdf › CompressARC/results_for_the_blog_post/plots_evaluation/b7f8a4d8_solutions.pdf]

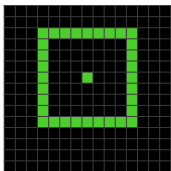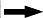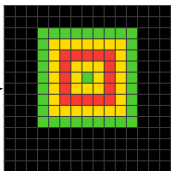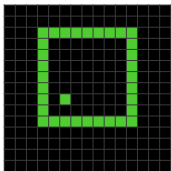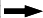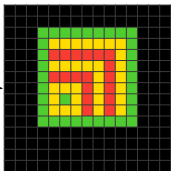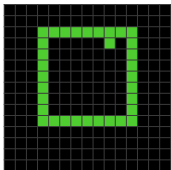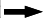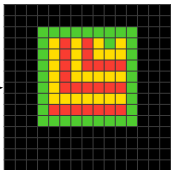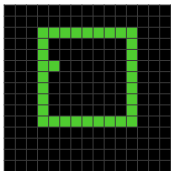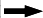

?

Supplement: supplementary_material [file b7fb29bc_problem.pdf › CompressARC/results_for_the_blog_post/plots_evaluation/b7fb29bc_problem.pdf]

sample

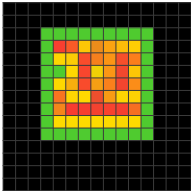

sample average

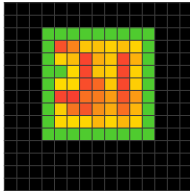

guess 1

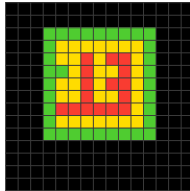

guess 2

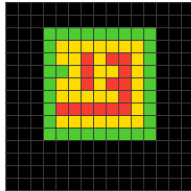

Supplement: supplementary_material [file b7fb29bc_solutions.pdf › CompressARC/results_for_the_blog_post/plots_evaluation/b7fb29bc_solutions.pdf]

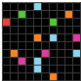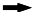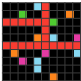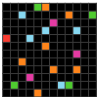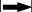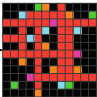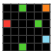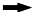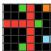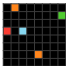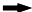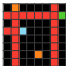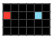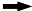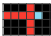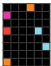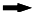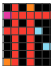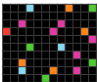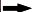

?

Supplement: supplementary_material [file b942fd60_problem.pdf › CompressARC/results_for_the_blog_post/plots_evaluation/b942fd60_problem.pdf]

sample

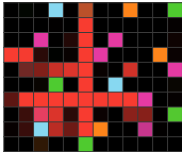

sample average

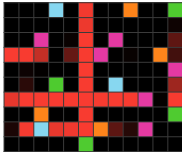

guess 1

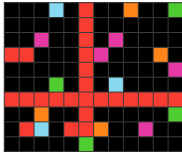

guess 2

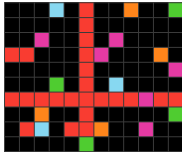

Supplement: supplementary_material [file b942fd60_solutions.pdf › CompressARC/results_for_the_blog_post/plots_evaluation/b942fd60_solutions.pdf]

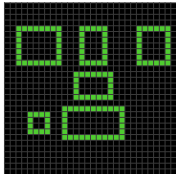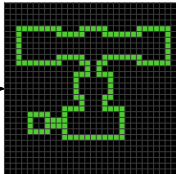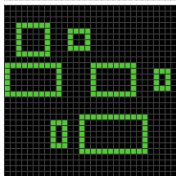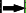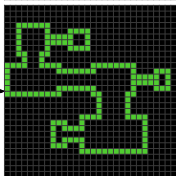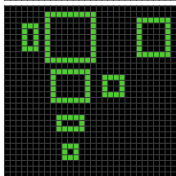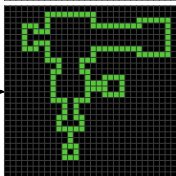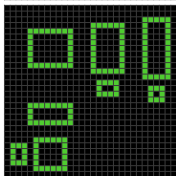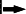

?

Supplement: supplementary_material [file b9630600_problem.pdf › CompressARC/results_for_the_blog_post/plots_evaluation/b9630600_problem.pdf]

sample

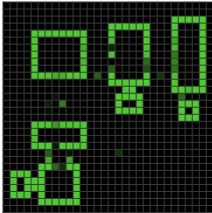

sample average

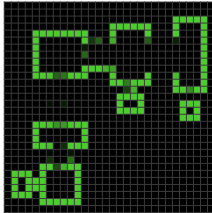

guess 1

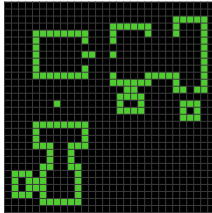

guess 2

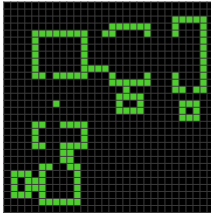

Supplement: supplementary_material [file b9630600_solutions.pdf › CompressARC/results_for_the_blog_post/plots_evaluation/b9630600_solutions.pdf]

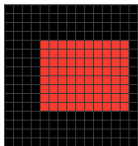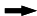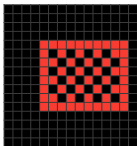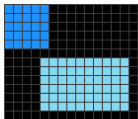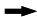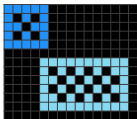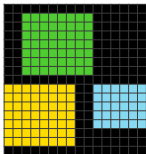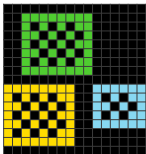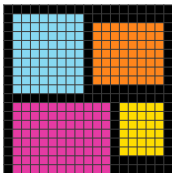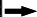

?

Supplement: supplementary_material [file ba9d41b8_problem.pdf › CompressARC/results_for_the_blog_post/plots_evaluation/ba9d41b8_problem.pdf]

sample

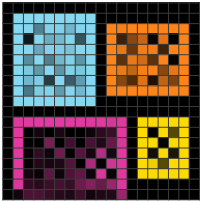

sample average

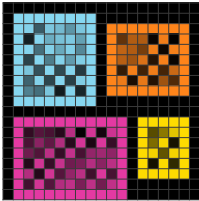

guess 1

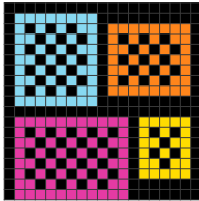

guess 2

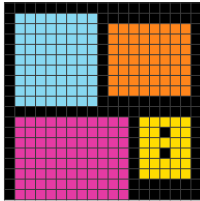

Supplement: supplementary_material [file ba9d41b8_solutions.pdf › CompressARC/results_for_the_blog_post/plots_evaluation/ba9d41b8_solutions.pdf]

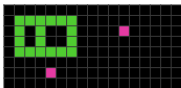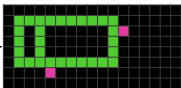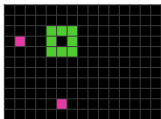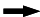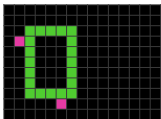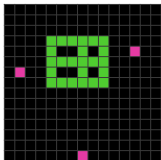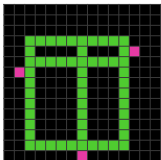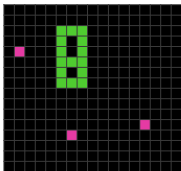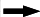

?

Supplement: supplementary_material [file baf41dbf_problem.pdf › CompressARC/results_for_the_blog_post/plots_evaluation/baf41dbf_problem.pdf]

sample

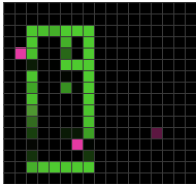

sample average

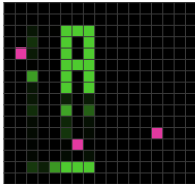

guess 1

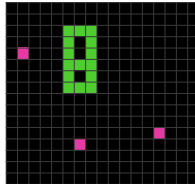

guess 2

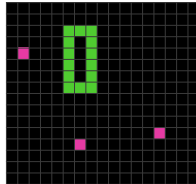

Supplement: supplementary_material [file baf41dbf_solutions.pdf › CompressARC/results_for_the_blog_post/plots_evaluation/baf41dbf_solutions.pdf]

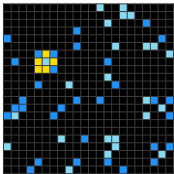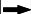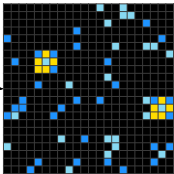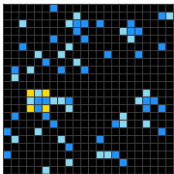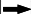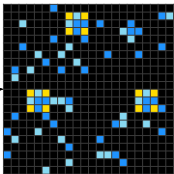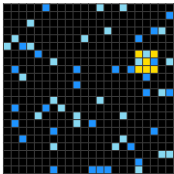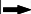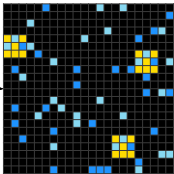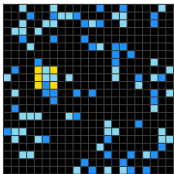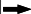

?

Supplement: supplementary_material [file bb52a14b_problem.pdf › CompressARC/results_for_the_blog_post/plots_evaluation/bb52a14b_problem.pdf]

sample

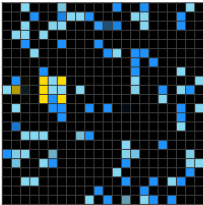

sample average

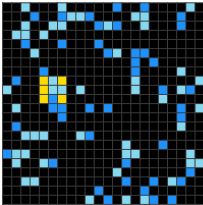

guess 1

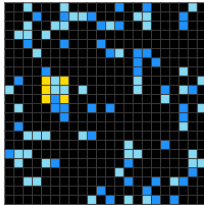

guess 2

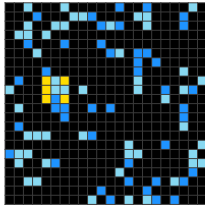

Supplement: supplementary_material [file bb52a14b_solutions.pdf › CompressARC/results_for_the_blog_post/plots_evaluation/bb52a14b_solutions.pdf]

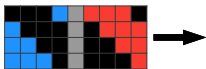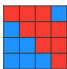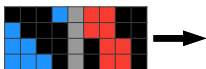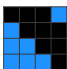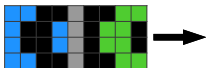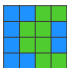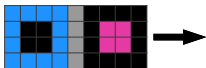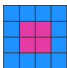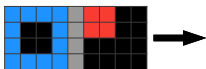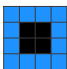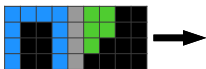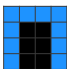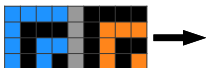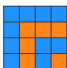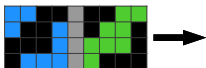

?

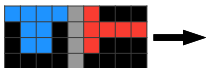

?

Supplement: supplementary_material [file bbb1b8b6_problem.pdf › CompressARC/results_for_the_blog_post/plots_evaluation/bbb1b8b6_problem.pdf]

sample

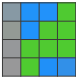

sample average

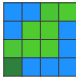

guess 1

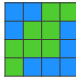

guess 2

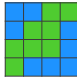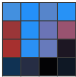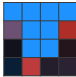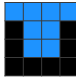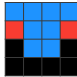

Supplement: supplementary_material [file bbb1b8b6_solutions.pdf › CompressARC/results_for_the_blog_post/plots_evaluation/bbb1b8b6_solutions.pdf]

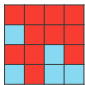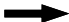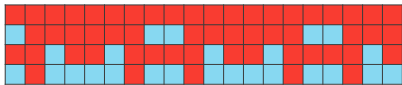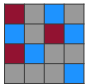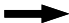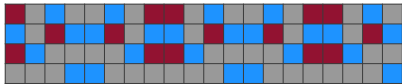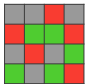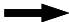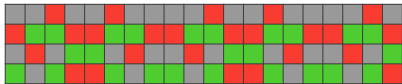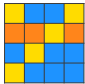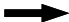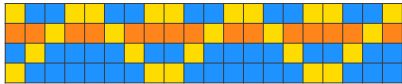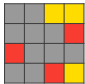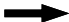

?

Supplement: supplementary_material [file bc4146bd_problem.pdf › CompressARC/results_for_the_blog_post/plots_evaluation/bc4146bd_problem.pdf]

## sample

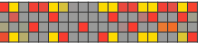

## sample average

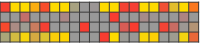

guess 1

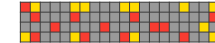

guess 2

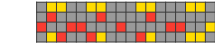

Supplement: supplementary_material [file bc4146bd_solutions.pdf › CompressARC/results_for_the_blog_post/plots_evaluation/bc4146bd_solutions.pdf]

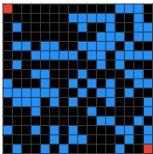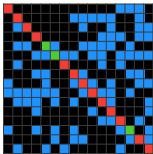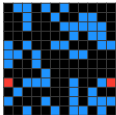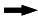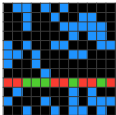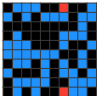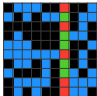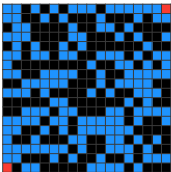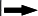

?

Supplement: supplementary_material [file bcb3040b_problem.pdf › CompressARC/results_for_the_blog_post/plots_evaluation/bcb3040b_problem.pdf]

sample

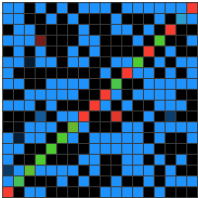

sample average

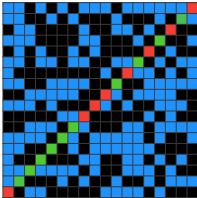

guess 1

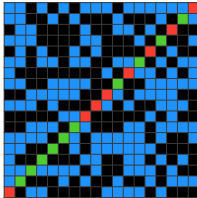

guess 2

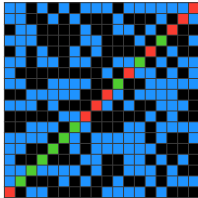

Supplement: supplementary_material [file bcb3040b_solutions.pdf › CompressARC/results_for_the_blog_post/plots_evaluation/bcb3040b_solutions.pdf]

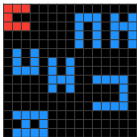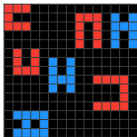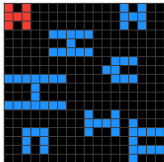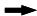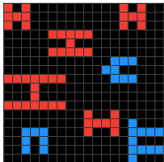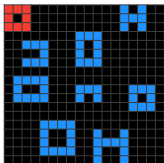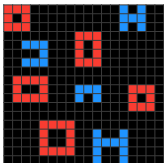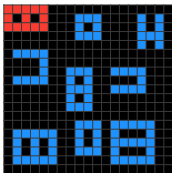

?

Supplement: supplementary_material [file bd14c3bf_problem.pdf › CompressARC/results_for_the_blog_post/plots_evaluation/bd14c3bf_problem.pdf]

sample

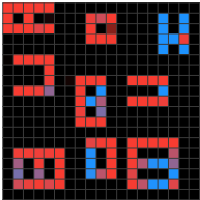

sample average

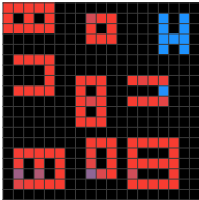

guess 1

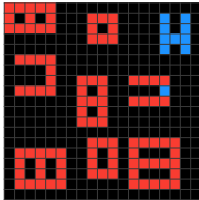

guess 2

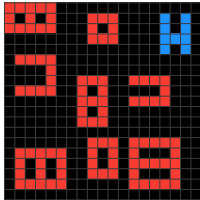

Supplement: supplementary_material [file bd14c3bf_solutions.pdf › CompressARC/results_for_the_blog_post/plots_evaluation/bd14c3bf_solutions.pdf]

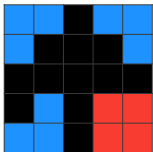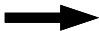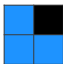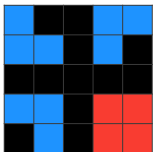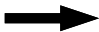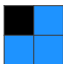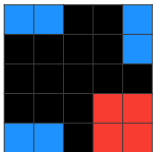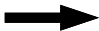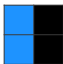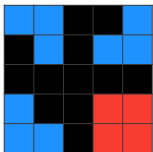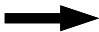

?

Supplement: supplementary_material [file be03b35f_problem.pdf › CompressARC/results_for_the_blog_post/plots_evaluation/be03b35f_problem.pdf]

sample

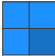

sample average

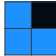

guess 1

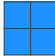

guess 2

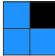

Supplement: supplementary_material [file be03b35f_solutions.pdf › CompressARC/results_for_the_blog_post/plots_evaluation/be03b35f_solutions.pdf]

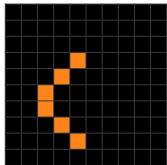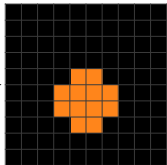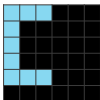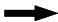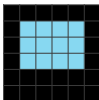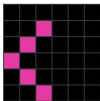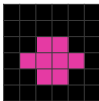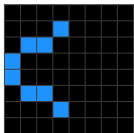

?

Supplement: supplementary_material [file bf32578f_problem.pdf › CompressARC/results_for_the_blog_post/plots_evaluation/bf32578f_problem.pdf]

sample

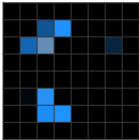

sample average

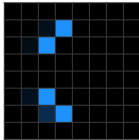

guess 1

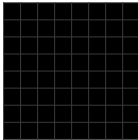

guess 2

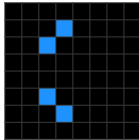

Supplement: supplementary_material [file bf32578f_solutions.pdf › CompressARC/results_for_the_blog_post/plots_evaluation/bf32578f_solutions.pdf]

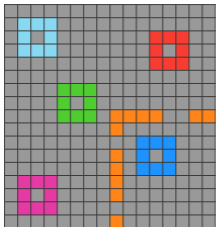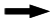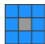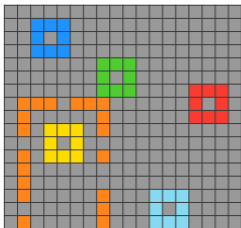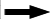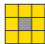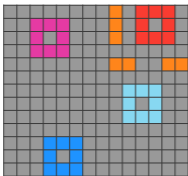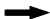

?

Supplement: supplementary_material [file bf699163_problem.pdf › CompressARC/results_for_the_blog_post/plots_evaluation/bf699163_problem.pdf]

sample

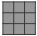

sample average

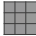

guess 1

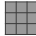

guess 2

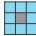

Supplement: supplementary_material [file bf699163_solutions.pdf › CompressARC/results_for_the_blog_post/plots_evaluation/bf699163_solutions.pdf]

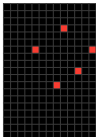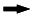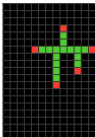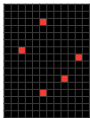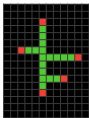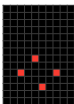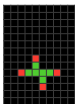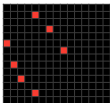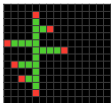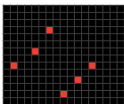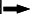

?

Supplement: supplementary_material [file bf89d739_problem.pdf › CompressARC/results_for_the_blog_post/plots_evaluation/bf89d739_problem.pdf]

sample

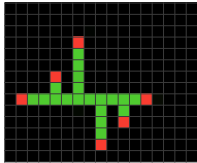

sample average

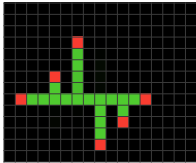

guess 1

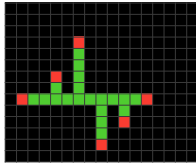

guess 2

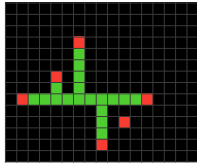

Supplement: supplementary_material [file bf89d739_solutions.pdf › CompressARC/results_for_the_blog_post/plots_evaluation/bf89d739_solutions.pdf]

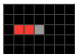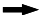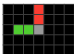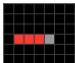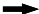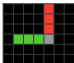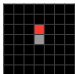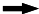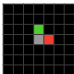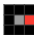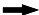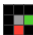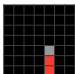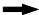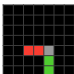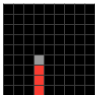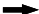

?

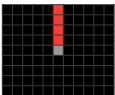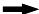

?

Supplement: supplementary_material [file c074846d_problem.pdf › CompressARC/results_for_the_blog_post/plots_evaluation/c074846d_problem.pdf]

sample

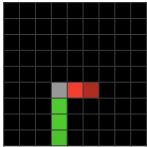

sample average

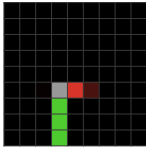

guess 1

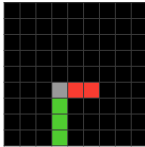

guess 2

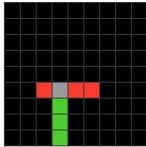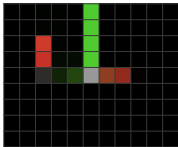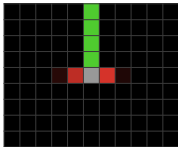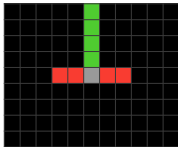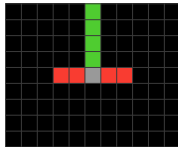

Supplement: supplementary_material [file c074846d_solutions.pdf › CompressARC/results_for_the_blog_post/plots_evaluation/c074846d_solutions.pdf]

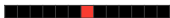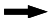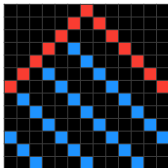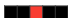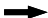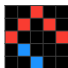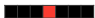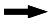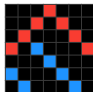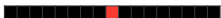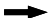

?

Supplement: supplementary_material [file c1990cce_problem.pdf › CompressARC/results_for_the_blog_post/plots_evaluation/c1990cce_problem.pdf]
