# Supplementary material (part 1 of 17)
Source: ML conference proceedings conference paper supplement (https://openreview.net/forum?id=jLC662Yo5h)

sample

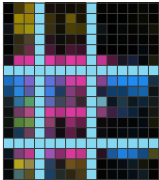

sample average

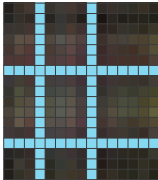

guess 1

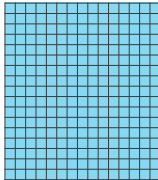

guess 2

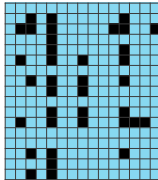

Supplement: supplementary_material [file 272f95fa_at_100 steps.pdf › CompressARC/results_for_the_blog_post/272f95fa/272f95fa_at_100 steps.pdf]

sample

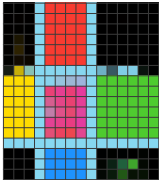

sample average

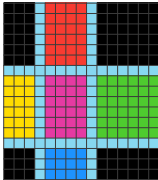

guess 1

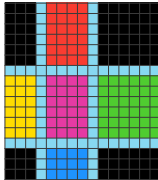

guess 2

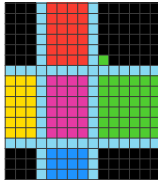

Supplement: supplementary_material [file 272f95fa_at_1000 steps.pdf › CompressARC/results_for_the_blog_post/272f95fa/272f95fa_at_1000 steps.pdf]

sample

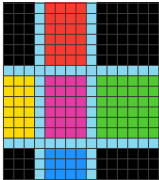

sample average

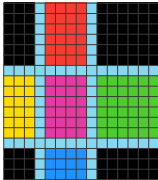

guess 1



guess 2



Supplement: supplementary_material [file 272f95fa_at_1050 steps.pdf › CompressARC/results_for_the_blog_post/272f95fa/272f95fa_at_1050 steps.pdf]

sample

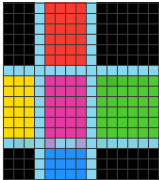

sample average

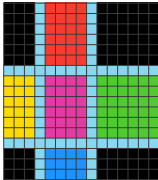

guess 1



guess 2

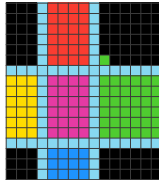

Supplement: supplementary_material [file 272f95fa_at_1100 steps.pdf › CompressARC/results_for_the_blog_post/272f95fa/272f95fa_at_1100 steps.pdf]

sample

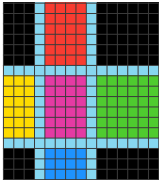

sample average

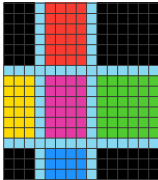

guess 1



guess 2



Supplement: supplementary_material [file 272f95fa_at_1150 steps.pdf › CompressARC/results_for_the_blog_post/272f95fa/272f95fa_at_1150 steps.pdf]

sample

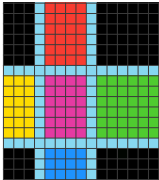

sample average

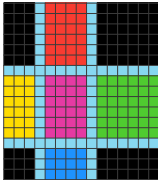

guess 1



guess 2



Supplement: supplementary_material [file 272f95fa_at_1200 steps.pdf › CompressARC/results_for_the_blog_post/272f95fa/272f95fa_at_1200 steps.pdf]

sample

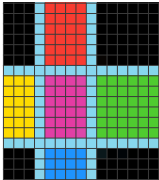

sample average

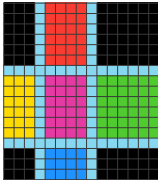

guess 1



guess 2



Supplement: supplementary_material [file 272f95fa_at_1250 steps.pdf › CompressARC/results_for_the_blog_post/272f95fa/272f95fa_at_1250 steps.pdf]

sample

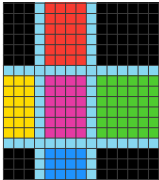

sample average

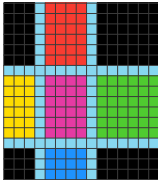

guess 1



guess 2



Supplement: supplementary_material [file 272f95fa_at_1300 steps.pdf › CompressARC/results_for_the_blog_post/272f95fa/272f95fa_at_1300 steps.pdf]

sample

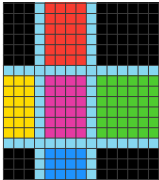

sample average

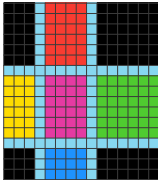

guess 1



guess 2



Supplement: supplementary_material [file 272f95fa_at_1350 steps.pdf › CompressARC/results_for_the_blog_post/272f95fa/272f95fa_at_1350 steps.pdf]

sample

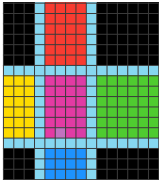

sample average

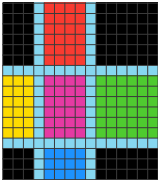

guess 1

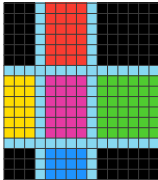

guess 2



Supplement: supplementary_material [file 272f95fa_at_1400 steps.pdf › CompressARC/results_for_the_blog_post/272f95fa/272f95fa_at_1400 steps.pdf]

sample

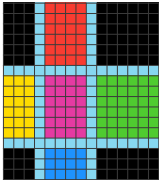

sample average

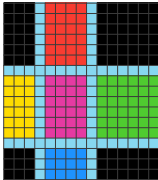

guess 1



guess 2



Supplement: supplementary_material [file 272f95fa_at_1450 steps.pdf › CompressARC/results_for_the_blog_post/272f95fa/272f95fa_at_1450 steps.pdf]

sample

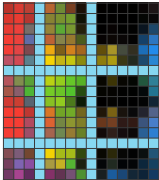

sample average

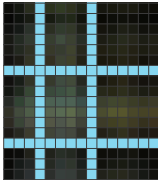

guess 1



guess 2

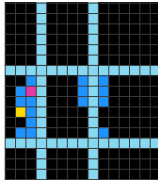

Supplement: supplementary_material [file 272f95fa_at_150 steps.pdf › CompressARC/results_for_the_blog_post/272f95fa/272f95fa_at_150 steps.pdf]

sample

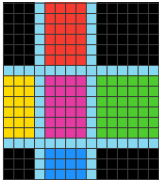

sample average

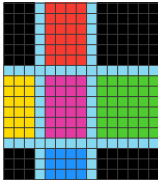

guess 1



guess 2



Supplement: supplementary_material [file 272f95fa_at_1500 steps.pdf › CompressARC/results_for_the_blog_post/272f95fa/272f95fa_at_1500 steps.pdf]

sample

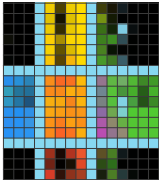

sample average

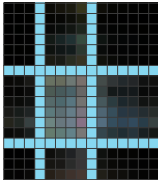

guess 1

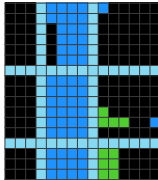

guess 2

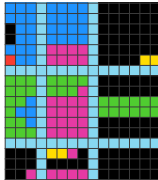

Supplement: supplementary_material [file 272f95fa_at_200 steps.pdf › CompressARC/results_for_the_blog_post/272f95fa/272f95fa_at_200 steps.pdf]

sample

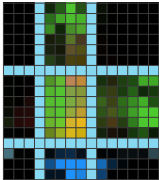

sample average

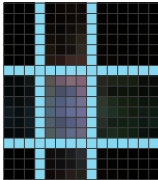

guess 1



guess 2

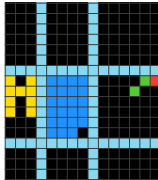

Supplement: supplementary_material [file 272f95fa_at_250 steps.pdf › CompressARC/results_for_the_blog_post/272f95fa/272f95fa_at_250 steps.pdf]

sample

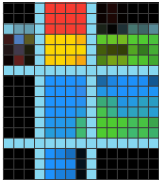

sample average

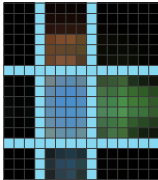

guess 1



guess 2



Supplement: supplementary_material [file 272f95fa_at_300 steps.pdf › CompressARC/results_for_the_blog_post/272f95fa/272f95fa_at_300 steps.pdf]

sample

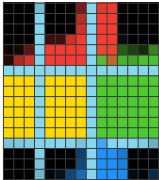

sample average

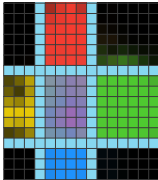

guess 1

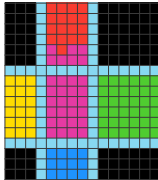

guess 2

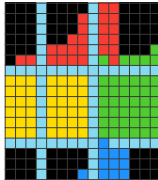

Supplement: supplementary_material [file 272f95fa_at_350 steps.pdf › CompressARC/results_for_the_blog_post/272f95fa/272f95fa_at_350 steps.pdf]

sample

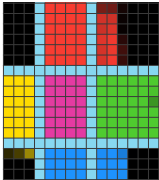

sample average

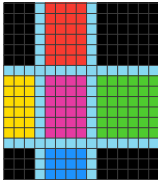

guess 1



guess 2

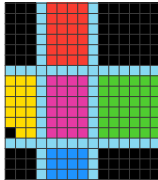

Supplement: supplementary_material [file 272f95fa_at_400 steps.pdf › CompressARC/results_for_the_blog_post/272f95fa/272f95fa_at_400 steps.pdf]

sample

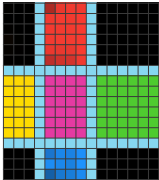

sample average

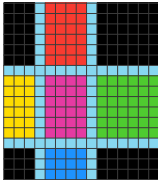

guess 1



guess 2

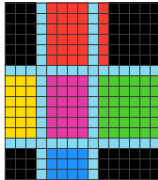

Supplement: supplementary_material [file 272f95fa_at_450 steps.pdf › CompressARC/results_for_the_blog_post/272f95fa/272f95fa_at_450 steps.pdf]

sample

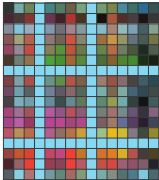

sample average

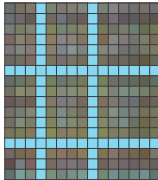

guess 1

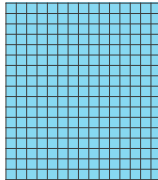

guess 2

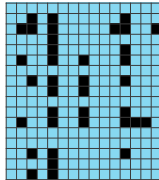

Supplement: supplementary_material [file 272f95fa_at_50 steps.pdf › CompressARC/results_for_the_blog_post/272f95fa/272f95fa_at_50 steps.pdf]

sample

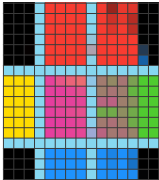

sample average

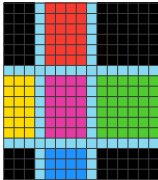

guess 1



guess 2

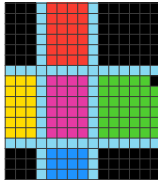

Supplement: supplementary_material [file 272f95fa_at_500 steps.pdf › CompressARC/results_for_the_blog_post/272f95fa/272f95fa_at_500 steps.pdf]

sample

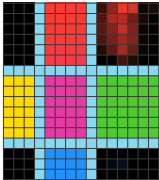

sample average

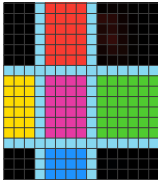

guess 1



guess 2



Supplement: supplementary_material [file 272f95fa_at_550 steps.pdf › CompressARC/results_for_the_blog_post/272f95fa/272f95fa_at_550 steps.pdf]

sample

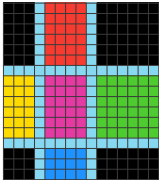

sample average

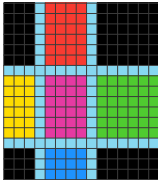

guess 1



guess 2

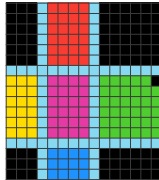

Supplement: supplementary_material [file 272f95fa_at_600 steps.pdf › CompressARC/results_for_the_blog_post/272f95fa/272f95fa_at_600 steps.pdf]

sample

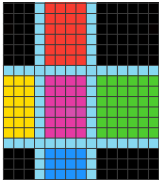

sample average

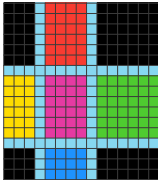

guess 1



guess 2

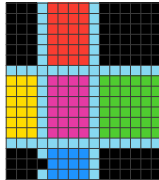

Supplement: supplementary_material [file 272f95fa_at_650 steps.pdf › CompressARC/results_for_the_blog_post/272f95fa/272f95fa_at_650 steps.pdf]

sample

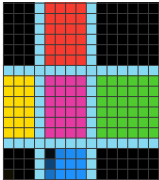

sample average

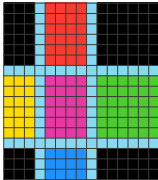

guess 1



guess 2

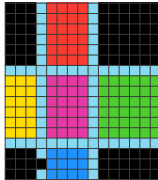

Supplement: supplementary_material [file 272f95fa_at_700 steps.pdf › CompressARC/results_for_the_blog_post/272f95fa/272f95fa_at_700 steps.pdf]

sample

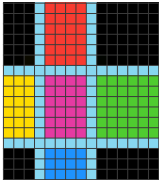

sample average

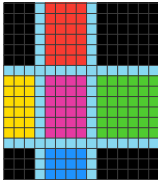

guess 1



guess 2



Supplement: supplementary_material [file 272f95fa_at_750 steps.pdf › CompressARC/results_for_the_blog_post/272f95fa/272f95fa_at_750 steps.pdf]

sample

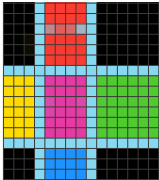

sample average

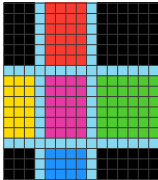

guess 1



guess 2



Supplement: supplementary_material [file 272f95fa_at_800 steps.pdf › CompressARC/results_for_the_blog_post/272f95fa/272f95fa_at_800 steps.pdf]

sample

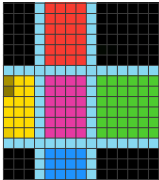

sample average

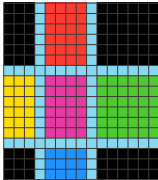

guess 1



guess 2



Supplement: supplementary_material [file 272f95fa_at_850 steps.pdf › CompressARC/results_for_the_blog_post/272f95fa/272f95fa_at_850 steps.pdf]

sample

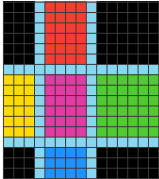

sample average

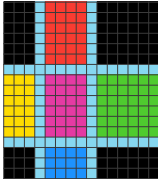

guess 1

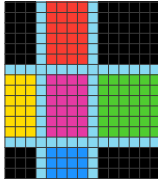

guess 2

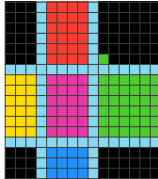

Supplement: supplementary_material [file 272f95fa_at_900 steps.pdf › CompressARC/results_for_the_blog_post/272f95fa/272f95fa_at_900 steps.pdf]

sample

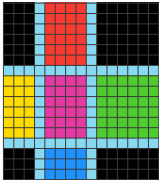

sample average

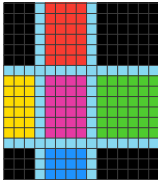

guess 1



guess 2



Supplement: supplementary_material [file 272f95fa_at_950 steps.pdf › CompressARC/results_for_the_blog_post/272f95fa/272f95fa_at_950 steps.pdf]

sample

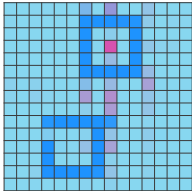

sample average

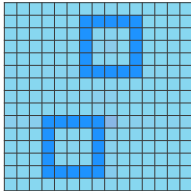

guess 1

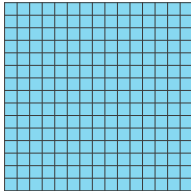

guess 2

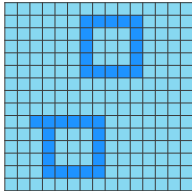

Supplement: supplementary_material [file 41e4d17e_at_100 steps.pdf › CompressARC/results_for_the_blog_post/41e4d17e/41e4d17e_at_100 steps.pdf]

sample

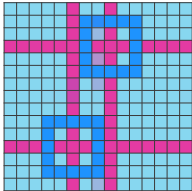

sample average

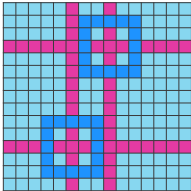

guess 1

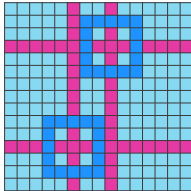

guess 2

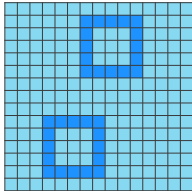

Supplement: supplementary_material [file 41e4d17e_at_1000 steps.pdf › CompressARC/results_for_the_blog_post/41e4d17e/41e4d17e_at_1000 steps.pdf]

sample

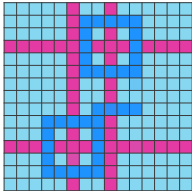

sample average

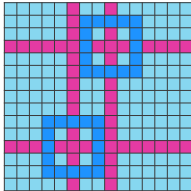

guess 1

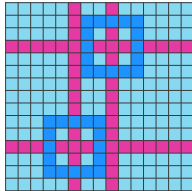

guess 2

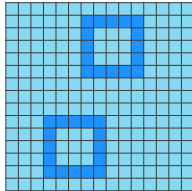

Supplement: supplementary_material [file 41e4d17e_at_1050 steps.pdf › CompressARC/results_for_the_blog_post/41e4d17e/41e4d17e_at_1050 steps.pdf]

sample

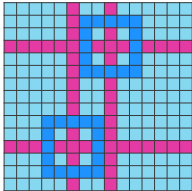

sample average

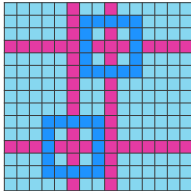

guess 1



guess 2



Supplement: supplementary_material [file 41e4d17e_at_1100 steps.pdf › CompressARC/results_for_the_blog_post/41e4d17e/41e4d17e_at_1100 steps.pdf]

sample

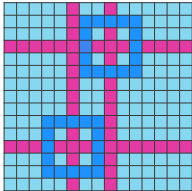

sample average

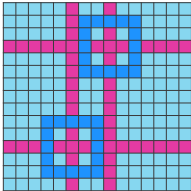

guess 1

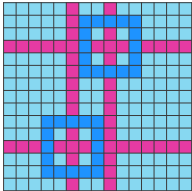

guess 2

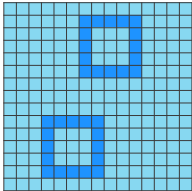

Supplement: supplementary_material [file 41e4d17e_at_1150 steps.pdf › CompressARC/results_for_the_blog_post/41e4d17e/41e4d17e_at_1150 steps.pdf]

sample

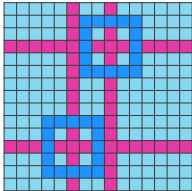

sample average

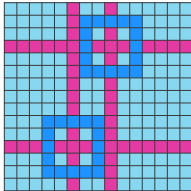

guess 1



guess 2



Supplement: supplementary_material [file 41e4d17e_at_1200 steps.pdf › CompressARC/results_for_the_blog_post/41e4d17e/41e4d17e_at_1200 steps.pdf]

sample

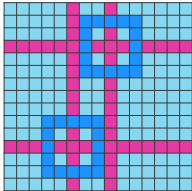

sample average

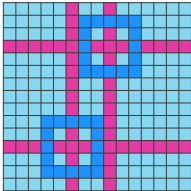

guess 1



guess 2



Supplement: supplementary_material [file 41e4d17e_at_1250 steps.pdf › CompressARC/results_for_the_blog_post/41e4d17e/41e4d17e_at_1250 steps.pdf]

sample

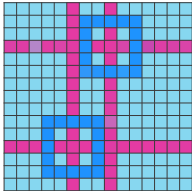

sample average

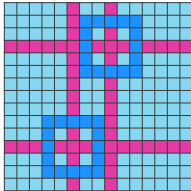

guess 1



guess 2



Supplement: supplementary_material [file 41e4d17e_at_1300 steps.pdf › CompressARC/results_for_the_blog_post/41e4d17e/41e4d17e_at_1300 steps.pdf]

sample

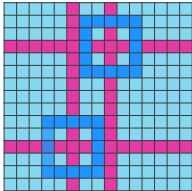

sample average

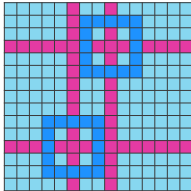

guess 1



guess 2



Supplement: supplementary_material [file 41e4d17e_at_1350 steps.pdf › CompressARC/results_for_the_blog_post/41e4d17e/41e4d17e_at_1350 steps.pdf]

sample

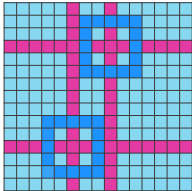

sample average

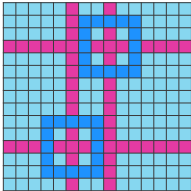

guess 1



guess 2



Supplement: supplementary_material [file 41e4d17e_at_1400 steps.pdf › CompressARC/results_for_the_blog_post/41e4d17e/41e4d17e_at_1400 steps.pdf]

sample

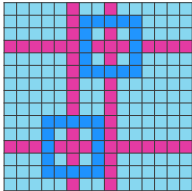

sample average

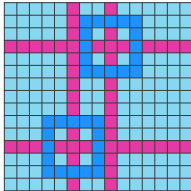

guess 1



guess 2



Supplement: supplementary_material [file 41e4d17e_at_1450 steps.pdf › CompressARC/results_for_the_blog_post/41e4d17e/41e4d17e_at_1450 steps.pdf]

sample

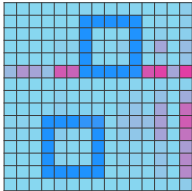

sample average

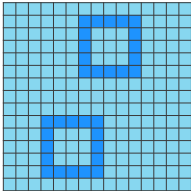

guess 1

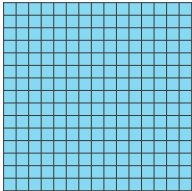

guess 2



Supplement: supplementary_material [file 41e4d17e_at_150 steps.pdf › CompressARC/results_for_the_blog_post/41e4d17e/41e4d17e_at_150 steps.pdf]

sample

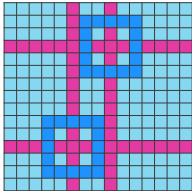

sample average

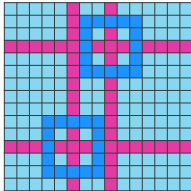

guess 1



guess 2



Supplement: supplementary_material [file 41e4d17e_at_1500 steps.pdf › CompressARC/results_for_the_blog_post/41e4d17e/41e4d17e_at_1500 steps.pdf]

sample

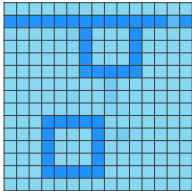

sample average

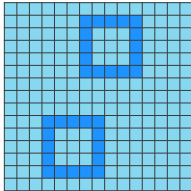

guess 1

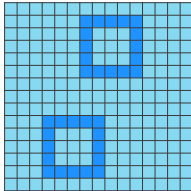

guess 2

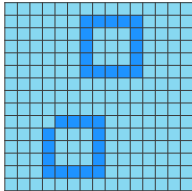

Supplement: supplementary_material [file 41e4d17e_at_200 steps.pdf › CompressARC/results_for_the_blog_post/41e4d17e/41e4d17e_at_200 steps.pdf]

sample

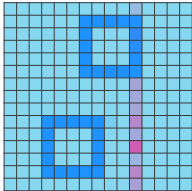

sample average

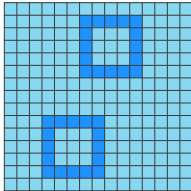

guess 1



guess 2

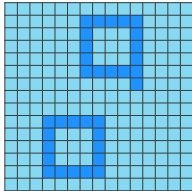

Supplement: supplementary_material [file 41e4d17e_at_250 steps.pdf › CompressARC/results_for_the_blog_post/41e4d17e/41e4d17e_at_250 steps.pdf]

sample

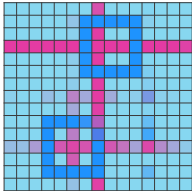

sample average

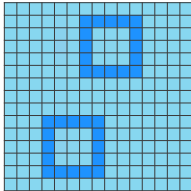

guess 1

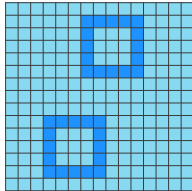

guess 2

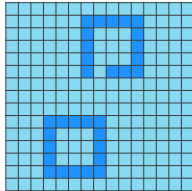

Supplement: supplementary_material [file 41e4d17e_at_300 steps.pdf › CompressARC/results_for_the_blog_post/41e4d17e/41e4d17e_at_300 steps.pdf]

sample

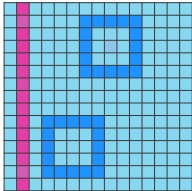

sample average

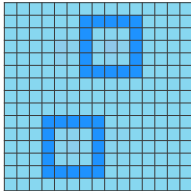

guess 1



guess 2



Supplement: supplementary_material [file 41e4d17e_at_350 steps.pdf › CompressARC/results_for_the_blog_post/41e4d17e/41e4d17e_at_350 steps.pdf]

sample

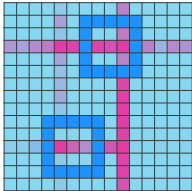

sample average

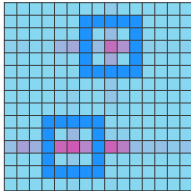

guess 1



guess 2



Supplement: supplementary_material [file 41e4d17e_at_400 steps.pdf › CompressARC/results_for_the_blog_post/41e4d17e/41e4d17e_at_400 steps.pdf]

sample

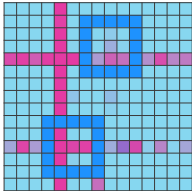

sample average

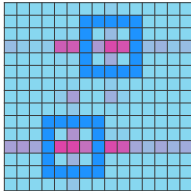

guess 1



guess 2



Supplement: supplementary_material [file 41e4d17e_at_450 steps.pdf › CompressARC/results_for_the_blog_post/41e4d17e/41e4d17e_at_450 steps.pdf]

sample

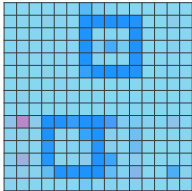

sample average

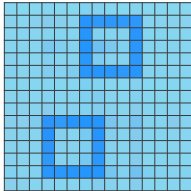

guess 1



guess 2

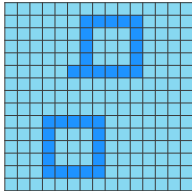

Supplement: supplementary_material [file 41e4d17e_at_50 steps.pdf › CompressARC/results_for_the_blog_post/41e4d17e/41e4d17e_at_50 steps.pdf]

sample

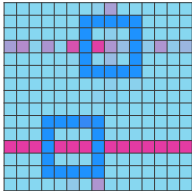

sample average

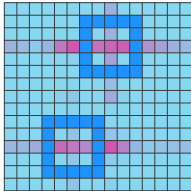

guess 1



guess 2



Supplement: supplementary_material [file 41e4d17e_at_500 steps.pdf › CompressARC/results_for_the_blog_post/41e4d17e/41e4d17e_at_500 steps.pdf]

sample

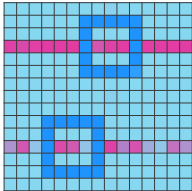

sample average

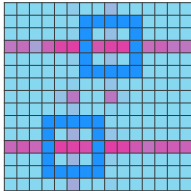

guess 1



guess 2



Supplement: supplementary_material [file 41e4d17e_at_550 steps.pdf › CompressARC/results_for_the_blog_post/41e4d17e/41e4d17e_at_550 steps.pdf]

sample

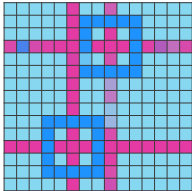

sample average

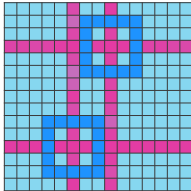

guess 1



guess 2

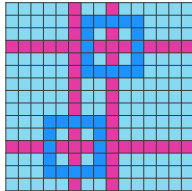

Supplement: supplementary_material [file 41e4d17e_at_600 steps.pdf › CompressARC/results_for_the_blog_post/41e4d17e/41e4d17e_at_600 steps.pdf]

sample

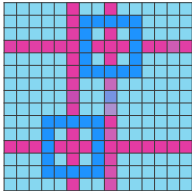

sample average

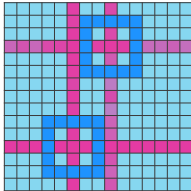

guess 1



guess 2



Supplement: supplementary_material [file 41e4d17e_at_650 steps.pdf › CompressARC/results_for_the_blog_post/41e4d17e/41e4d17e_at_650 steps.pdf]

sample

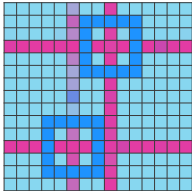

sample average

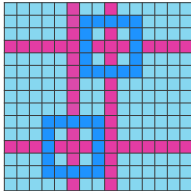

guess 1



guess 2



Supplement: supplementary_material [file 41e4d17e_at_700 steps.pdf › CompressARC/results_for_the_blog_post/41e4d17e/41e4d17e_at_700 steps.pdf]

sample

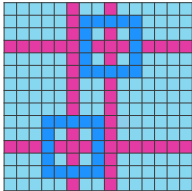

sample average

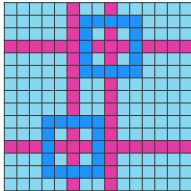

guess 1



guess 2



Supplement: supplementary_material [file 41e4d17e_at_750 steps.pdf › CompressARC/results_for_the_blog_post/41e4d17e/41e4d17e_at_750 steps.pdf]

sample

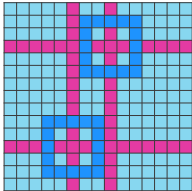

sample average

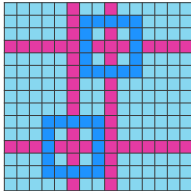

guess 1



guess 2



Supplement: supplementary_material [file 41e4d17e_at_800 steps.pdf › CompressARC/results_for_the_blog_post/41e4d17e/41e4d17e_at_800 steps.pdf]

sample

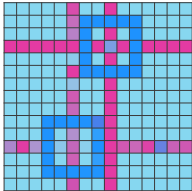

sample average

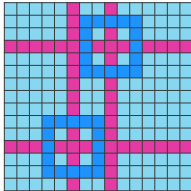

guess 1



guess 2



Supplement: supplementary_material [file 41e4d17e_at_850 steps.pdf › CompressARC/results_for_the_blog_post/41e4d17e/41e4d17e_at_850 steps.pdf]

sample

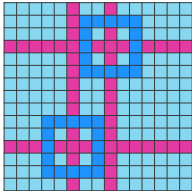

sample average

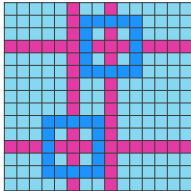

guess 1



guess 2



Supplement: supplementary_material [file 41e4d17e_at_900 steps.pdf › CompressARC/results_for_the_blog_post/41e4d17e/41e4d17e_at_900 steps.pdf]

sample

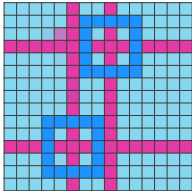

sample average

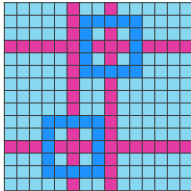

guess 1



guess 2



Supplement: supplementary_material [file 41e4d17e_at_950 steps.pdf › CompressARC/results_for_the_blog_post/41e4d17e/41e4d17e_at_950 steps.pdf]

sample

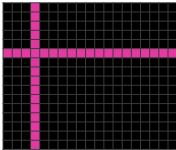

sample average

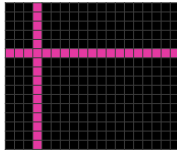

guess 1

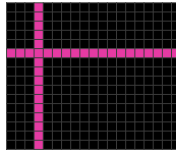

guess 2

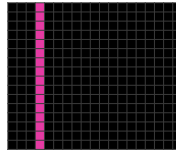

Supplement: supplementary_material [file 6cdd2623_at_1000 steps.pdf › CompressARC/results_for_the_blog_post/6cdd2623/6cdd2623_at_1000 steps.pdf]

sample

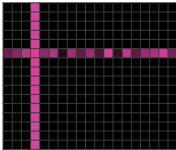

sample average

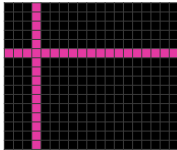

guess 1

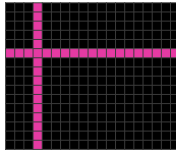

guess 2

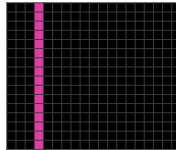

Supplement: supplementary_material [file 6cdd2623_at_1050 steps.pdf › CompressARC/results_for_the_blog_post/6cdd2623/6cdd2623_at_1050 steps.pdf]

sample

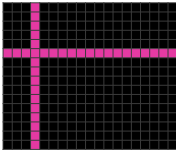

sample average



guess 1



guess 2



Supplement: supplementary_material [file 6cdd2623_at_1100 steps.pdf › CompressARC/results_for_the_blog_post/6cdd2623/6cdd2623_at_1100 steps.pdf]

sample

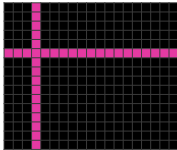

sample average

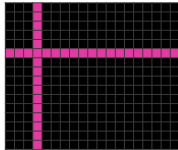

guess 1

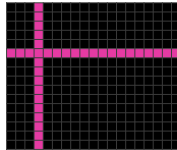

guess 2

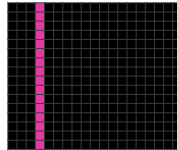

Supplement: supplementary_material [file 6cdd2623_at_1150 steps.pdf › CompressARC/results_for_the_blog_post/6cdd2623/6cdd2623_at_1150 steps.pdf]

sample

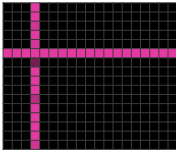

sample average

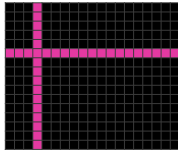

guess 1

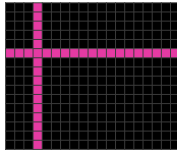

guess 2

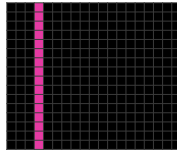

Supplement: supplementary_material [file 6cdd2623_at_1200 steps.pdf › CompressARC/results_for_the_blog_post/6cdd2623/6cdd2623_at_1200 steps.pdf]

sample

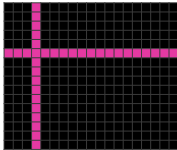

sample average



guess 1



guess 2



Supplement: supplementary_material [file 6cdd2623_at_1250 steps.pdf › CompressARC/results_for_the_blog_post/6cdd2623/6cdd2623_at_1250 steps.pdf]

sample

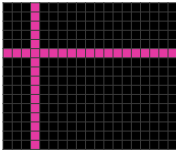

sample average



guess 1



guess 2



Supplement: supplementary_material [file 6cdd2623_at_1300 steps.pdf › CompressARC/results_for_the_blog_post/6cdd2623/6cdd2623_at_1300 steps.pdf]

sample

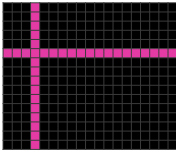

sample average

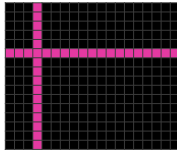

guess 1



guess 2



Supplement: supplementary_material [file 6cdd2623_at_1350 steps.pdf › CompressARC/results_for_the_blog_post/6cdd2623/6cdd2623_at_1350 steps.pdf]

sample

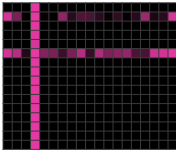

sample average

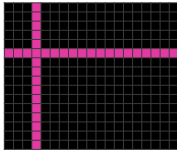

guess 1



guess 2



Supplement: supplementary_material [file 6cdd2623_at_1400 steps.pdf › CompressARC/results_for_the_blog_post/6cdd2623/6cdd2623_at_1400 steps.pdf]

sample

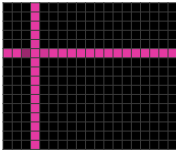

sample average

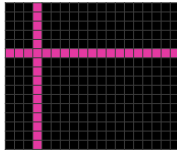

guess 1



guess 2



Supplement: supplementary_material [file 6cdd2623_at_1450 steps.pdf › CompressARC/results_for_the_blog_post/6cdd2623/6cdd2623_at_1450 steps.pdf]

sample

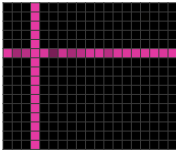

sample average

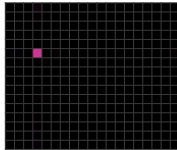

guess 1

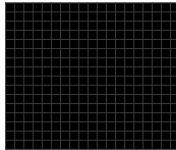

guess 2

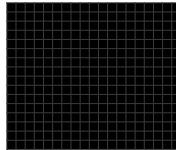

Supplement: supplementary_material [file 6cdd2623_at_150 steps.pdf › CompressARC/results_for_the_blog_post/6cdd2623/6cdd2623_at_150 steps.pdf]

sample

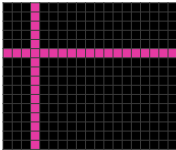

sample average

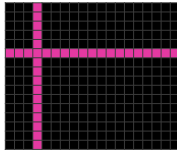

guess 1



guess 2



Supplement: supplementary_material [file 6cdd2623_at_1500 steps.pdf › CompressARC/results_for_the_blog_post/6cdd2623/6cdd2623_at_1500 steps.pdf]

sample

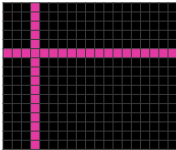

sample average

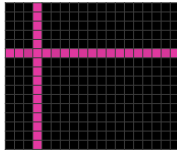

guess 1



guess 2



Supplement: supplementary_material [file 6cdd2623_at_200 steps.pdf › CompressARC/results_for_the_blog_post/6cdd2623/6cdd2623_at_200 steps.pdf]

sample

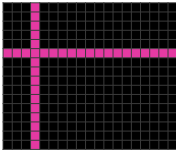

sample average



guess 1



guess 2



Supplement: supplementary_material [file 6cdd2623_at_250 steps.pdf › CompressARC/results_for_the_blog_post/6cdd2623/6cdd2623_at_250 steps.pdf]

sample

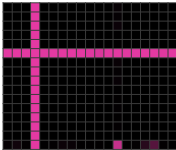

sample average



guess 1



guess 2

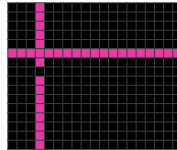

Supplement: supplementary_material [file 6cdd2623_at_300 steps.pdf › CompressARC/results_for_the_blog_post/6cdd2623/6cdd2623_at_300 steps.pdf]

sample

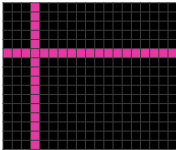

sample average

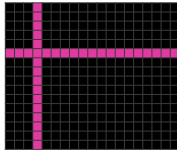

guess 1



guess 2



Supplement: supplementary_material [file 6cdd2623_at_350 steps.pdf › CompressARC/results_for_the_blog_post/6cdd2623/6cdd2623_at_350 steps.pdf]

sample

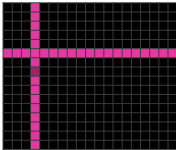

sample average



guess 1



guess 2



Supplement: supplementary_material [file 6cdd2623_at_400 steps.pdf › CompressARC/results_for_the_blog_post/6cdd2623/6cdd2623_at_400 steps.pdf]

sample

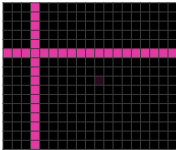

sample average



guess 1



guess 2



Supplement: supplementary_material [file 6cdd2623_at_450 steps.pdf › CompressARC/results_for_the_blog_post/6cdd2623/6cdd2623_at_450 steps.pdf]

sample

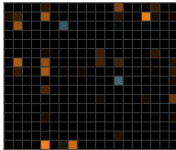

sample average

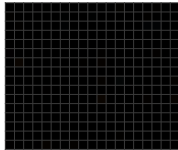

guess 1

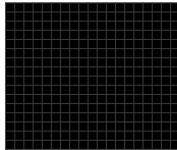

guess 2

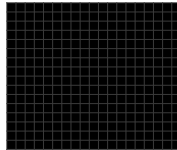

Supplement: supplementary_material [file 6cdd2623_at_50 steps.pdf › CompressARC/results_for_the_blog_post/6cdd2623/6cdd2623_at_50 steps.pdf]

sample

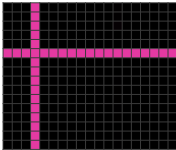

sample average



guess 1



guess 2



Supplement: supplementary_material [file 6cdd2623_at_500 steps.pdf › CompressARC/results_for_the_blog_post/6cdd2623/6cdd2623_at_500 steps.pdf]

sample

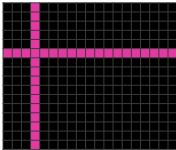

sample average



guess 1



guess 2

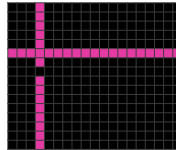

Supplement: supplementary_material [file 6cdd2623_at_550 steps.pdf › CompressARC/results_for_the_blog_post/6cdd2623/6cdd2623_at_550 steps.pdf]

sample

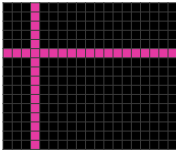

sample average



guess 1



guess 2



Supplement: supplementary_material [file 6cdd2623_at_600 steps.pdf › CompressARC/results_for_the_blog_post/6cdd2623/6cdd2623_at_600 steps.pdf]

sample

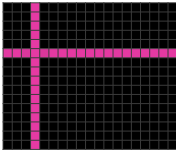

sample average



guess 1



guess 2



Supplement: supplementary_material [file 6cdd2623_at_650 steps.pdf › CompressARC/results_for_the_blog_post/6cdd2623/6cdd2623_at_650 steps.pdf]

sample

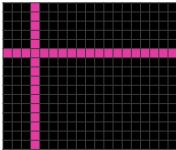

sample average

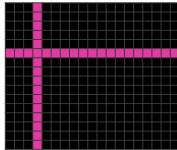

guess 1



guess 2



Supplement: supplementary_material [file 6cdd2623_at_700 steps.pdf › CompressARC/results_for_the_blog_post/6cdd2623/6cdd2623_at_700 steps.pdf]

sample

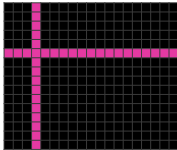

sample average

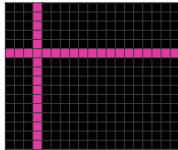

guess 1



guess 2

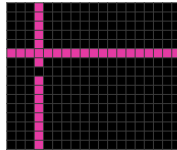

Supplement: supplementary_material [file 6cdd2623_at_750 steps.pdf › CompressARC/results_for_the_blog_post/6cdd2623/6cdd2623_at_750 steps.pdf]

sample

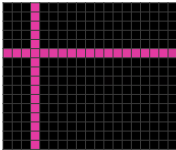

sample average

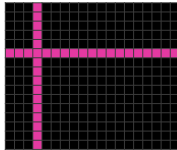

guess 1



guess 2



Supplement: supplementary_material [file 6cdd2623_at_800 steps.pdf › CompressARC/results_for_the_blog_post/6cdd2623/6cdd2623_at_800 steps.pdf]

sample

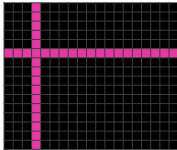

sample average



guess 1



guess 2



Supplement: supplementary_material [file 6cdd2623_at_850 steps.pdf › CompressARC/results_for_the_blog_post/6cdd2623/6cdd2623_at_850 steps.pdf]

sample

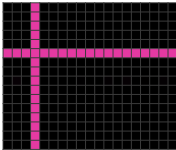

sample average

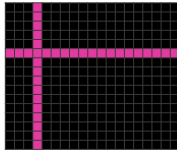

guess 1



guess 2



Supplement: supplementary_material [file 6cdd2623_at_900 steps.pdf › CompressARC/results_for_the_blog_post/6cdd2623/6cdd2623_at_900 steps.pdf]

sample

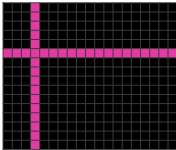

sample average

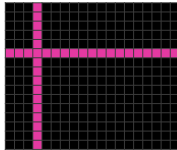

guess 1



guess 2



Supplement: supplementary_material [file 6cdd2623_at_950 steps.pdf › CompressARC/results_for_the_blog_post/6cdd2623/6cdd2623_at_950 steps.pdf]

sample

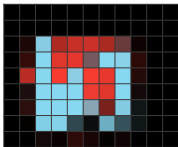

sample average

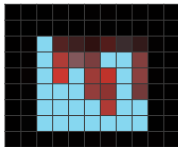

guess 1

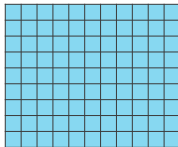

guess 2

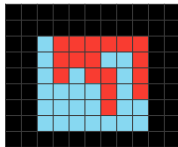

Supplement: supplementary_material [file 6d75e8bb_at_100 steps.pdf › CompressARC/results_for_the_blog_post/6d75e8bb/6d75e8bb_at_100 steps.pdf]

sample

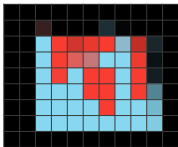

sample average

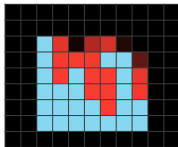

guess 1

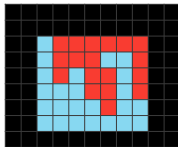

guess 2

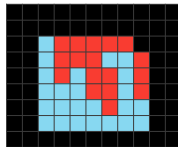

Supplement: supplementary_material [file 6d75e8bb_at_1000 steps.pdf › CompressARC/results_for_the_blog_post/6d75e8bb/6d75e8bb_at_1000 steps.pdf]

sample

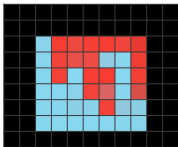

sample average

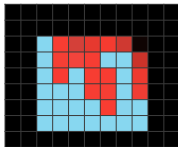

guess 1



guess 2



Supplement: supplementary_material [file 6d75e8bb_at_1050 steps.pdf › CompressARC/results_for_the_blog_post/6d75e8bb/6d75e8bb_at_1050 steps.pdf]

sample

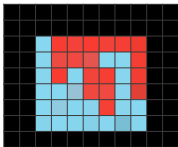

sample average

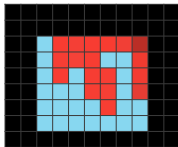

guess 1



guess 2



Supplement: supplementary_material [file 6d75e8bb_at_1100 steps.pdf › CompressARC/results_for_the_blog_post/6d75e8bb/6d75e8bb_at_1100 steps.pdf]

sample

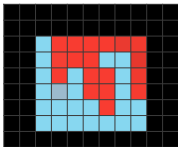

sample average

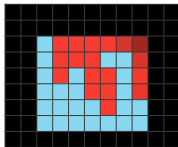

guess 1



guess 2

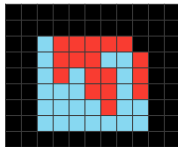

Supplement: supplementary_material [file 6d75e8bb_at_1150 steps.pdf › CompressARC/results_for_the_blog_post/6d75e8bb/6d75e8bb_at_1150 steps.pdf]

sample

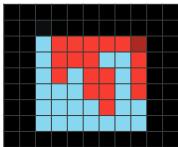

sample average

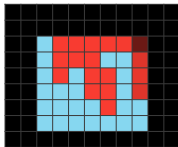

guess 1



guess 2



Supplement: supplementary_material [file 6d75e8bb_at_1200 steps.pdf › CompressARC/results_for_the_blog_post/6d75e8bb/6d75e8bb_at_1200 steps.pdf]

sample

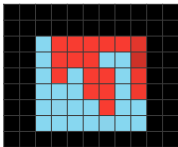

sample average

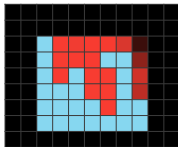

guess 1



guess 2



Supplement: supplementary_material [file 6d75e8bb_at_1250 steps.pdf › CompressARC/results_for_the_blog_post/6d75e8bb/6d75e8bb_at_1250 steps.pdf]

sample

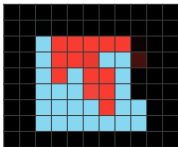

sample average

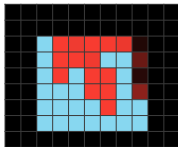

guess 1



guess 2



Supplement: supplementary_material [file 6d75e8bb_at_1350 steps.pdf › CompressARC/results_for_the_blog_post/6d75e8bb/6d75e8bb_at_1350 steps.pdf]

sample

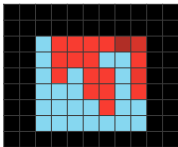

sample average

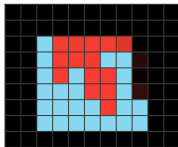

guess 1



guess 2



Supplement: supplementary_material [file 6d75e8bb_at_1400 steps.pdf › CompressARC/results_for_the_blog_post/6d75e8bb/6d75e8bb_at_1400 steps.pdf]

sample

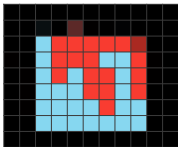

sample average

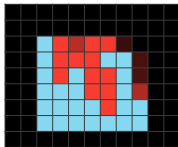

guess 1



guess 2



Supplement: supplementary_material [file 6d75e8bb_at_1450 steps.pdf › CompressARC/results_for_the_blog_post/6d75e8bb/6d75e8bb_at_1450 steps.pdf]

sample

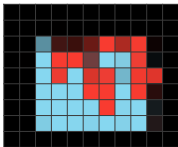

sample average

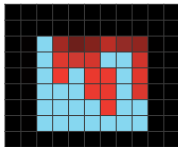

guess 1



guess 2

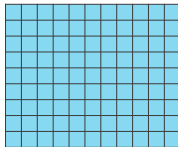

Supplement: supplementary_material [file 6d75e8bb_at_150 steps.pdf › CompressARC/results_for_the_blog_post/6d75e8bb/6d75e8bb_at_150 steps.pdf]
