# Supplementary material (part 14 of 17)
Source: ML conference proceedings conference paper supplement (https://openreview.net/forum?id=jLC662Yo5h)

sample

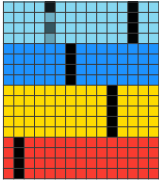

sample average

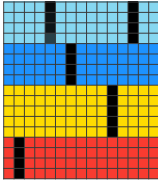

guess 1

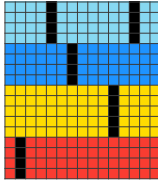

guess 2

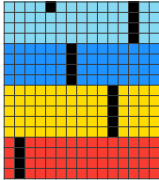

Supplement: supplementary_material [file 855e0971_solutions.pdf › CompressARC/results_for_the_blog_post/plots_training/855e0971_solutions.pdf]

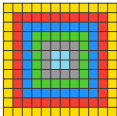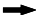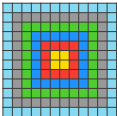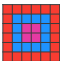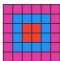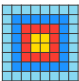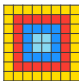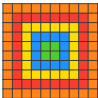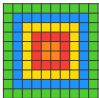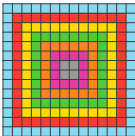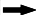

?

Supplement: supplementary_material [file 85c4e7cd_problem.pdf › CompressARC/results_for_the_blog_post/plots_training/85c4e7cd_problem.pdf]

sample

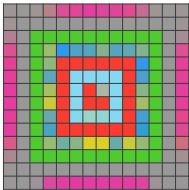

sample average

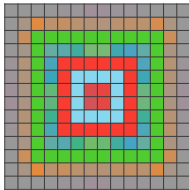

guess 1

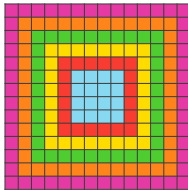

guess 2

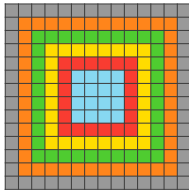

Supplement: supplementary_material [file 85c4e7cd_solutions.pdf › CompressARC/results_for_the_blog_post/plots_training/85c4e7cd_solutions.pdf]

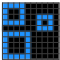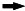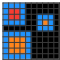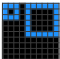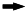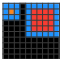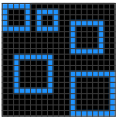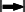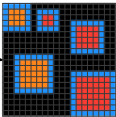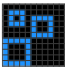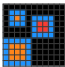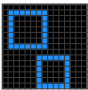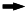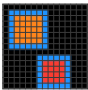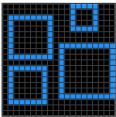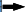

?

Supplement: supplementary_material [file 868de0fa_problem.pdf › CompressARC/results_for_the_blog_post/plots_training/868de0fa_problem.pdf]

sample

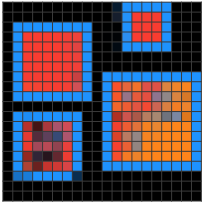

sample average

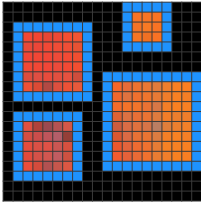

guess 1

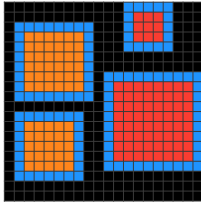

guess 2

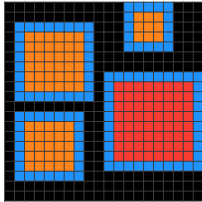

Supplement: supplementary_material [file 868de0fa_solutions.pdf › CompressARC/results_for_the_blog_post/plots_training/868de0fa_solutions.pdf]

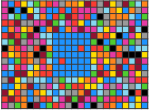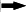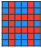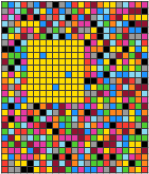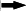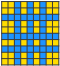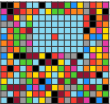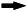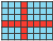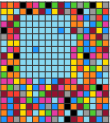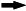

?

Supplement: supplementary_material [file 8731374e_problem.pdf › CompressARC/results_for_the_blog_post/plots_training/8731374e_problem.pdf]

sample

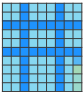

sample average

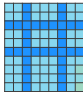

guess 1

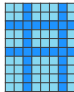

guess 2

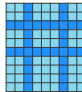

Supplement: supplementary_material [file 8731374e_solutions.pdf › CompressARC/results_for_the_blog_post/plots_training/8731374e_solutions.pdf]

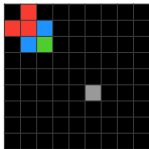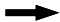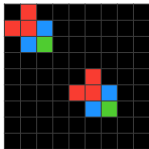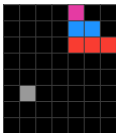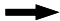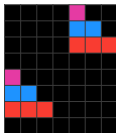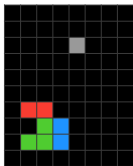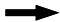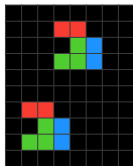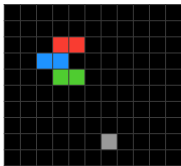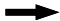

?

Supplement: supplementary_material [file 88a10436_problem.pdf › CompressARC/results_for_the_blog_post/plots_training/88a10436_problem.pdf]

sample

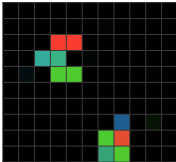

sample average

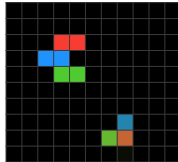

guess 1

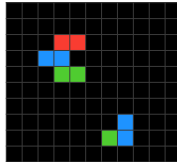

guess 2

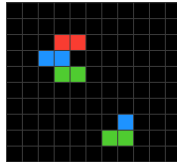

Supplement: supplementary_material [file 88a10436_solutions.pdf › CompressARC/results_for_the_blog_post/plots_training/88a10436_solutions.pdf]

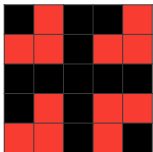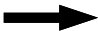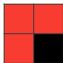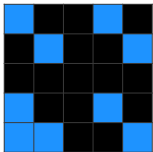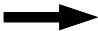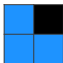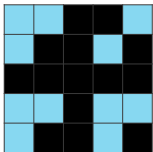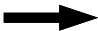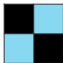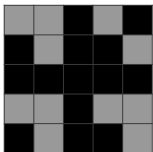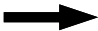

?

Supplement: supplementary_material [file 88a62173_problem.pdf › CompressARC/results_for_the_blog_post/plots_training/88a62173_problem.pdf]

sample

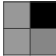

sample average

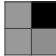

guess 1

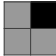

guess 2

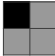

Supplement: supplementary_material [file 88a62173_solutions.pdf › CompressARC/results_for_the_blog_post/plots_training/88a62173_solutions.pdf]

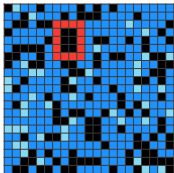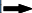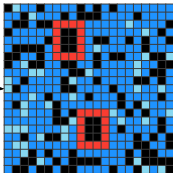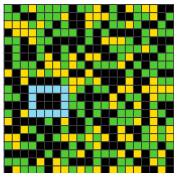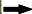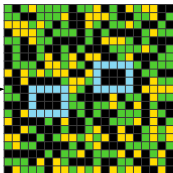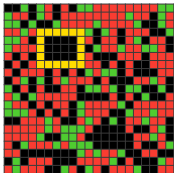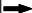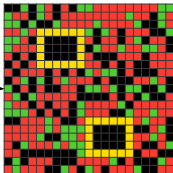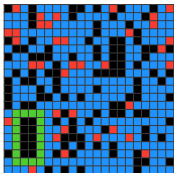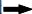

?

Supplement: supplementary_material [file 890034e9_problem.pdf › CompressARC/results_for_the_blog_post/plots_training/890034e9_problem.pdf]

sample

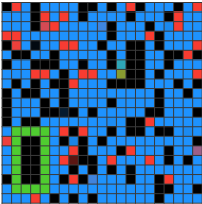

sample average

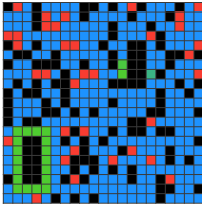

guess 1

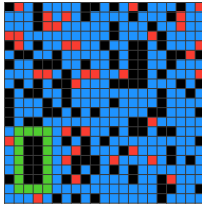

guess 2

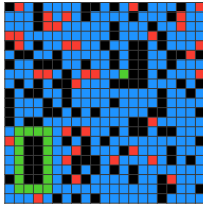

Supplement: supplementary_material [file 890034e9_solutions.pdf › CompressARC/results_for_the_blog_post/plots_training/890034e9_solutions.pdf]

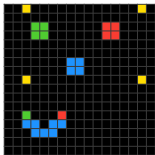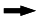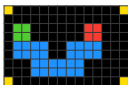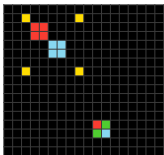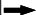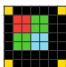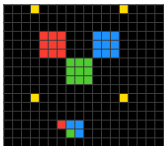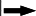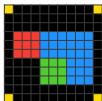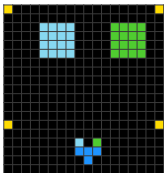

?

Supplement: supplementary_material [file 8a004b2b_problem.pdf › CompressARC/results_for_the_blog_post/plots_training/8a004b2b_problem.pdf]

sample

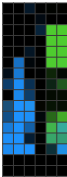

sample average

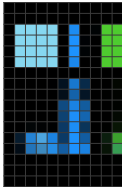

guess 1

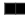

guess 2

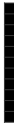

Supplement: supplementary_material [file 8a004b2b_solutions.pdf › CompressARC/results_for_the_blog_post/plots_training/8a004b2b_solutions.pdf]

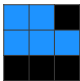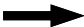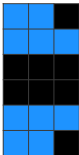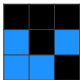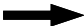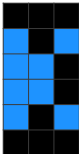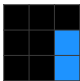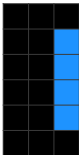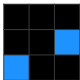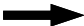

?

Supplement: supplementary_material [file 8be77c9e_problem.pdf › CompressARC/results_for_the_blog_post/plots_training/8be77c9e_problem.pdf]

sample

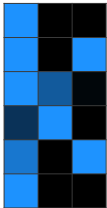

sample average

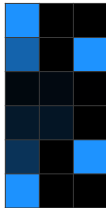

guess 1

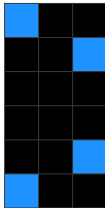

guess 2

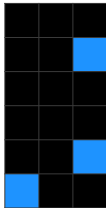

Supplement: supplementary_material [file 8be77c9e_solutions.pdf › CompressARC/results_for_the_blog_post/plots_training/8be77c9e_solutions.pdf]

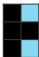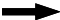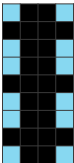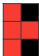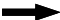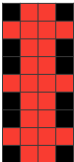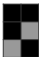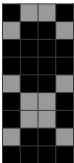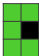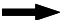

?

Supplement: supplementary_material [file 8d5021e8_problem.pdf › CompressARC/results_for_the_blog_post/plots_training/8d5021e8_problem.pdf]

sample

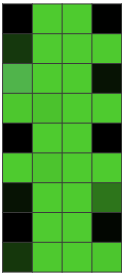

sample average

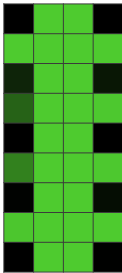

guess 1

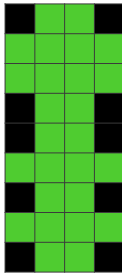

guess 2

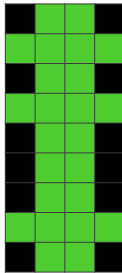

Supplement: supplementary_material [file 8d5021e8_solutions.pdf › CompressARC/results_for_the_blog_post/plots_training/8d5021e8_solutions.pdf]

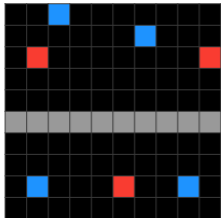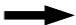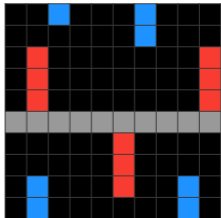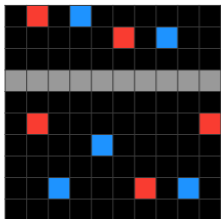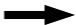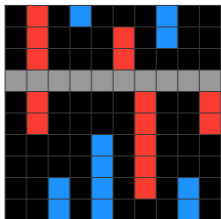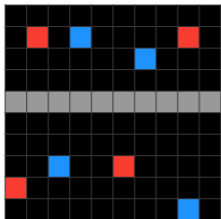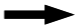

?

Supplement: supplementary_material [file 8d510a79_problem.pdf › CompressARC/results_for_the_blog_post/plots_training/8d510a79_problem.pdf]

sample

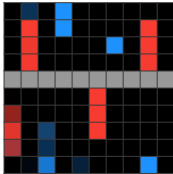

sample average

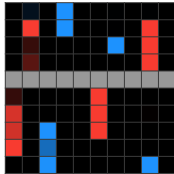

guess 1

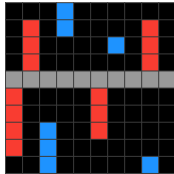

guess 2

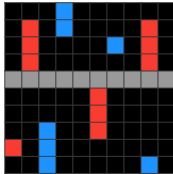

Supplement: supplementary_material [file 8d510a79_solutions.pdf › CompressARC/results_for_the_blog_post/plots_training/8d510a79_solutions.pdf]

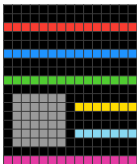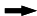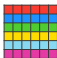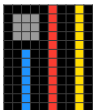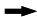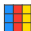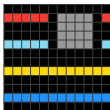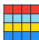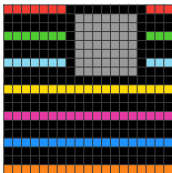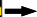

?

Supplement: supplementary_material [file 8e1813be_problem.pdf › CompressARC/results_for_the_blog_post/plots_training/8e1813be_problem.pdf]

sample

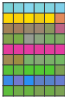

sample average

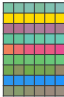

guess 1

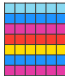

guess 2

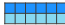

Supplement: supplementary_material [file 8e1813be_solutions.pdf › CompressARC/results_for_the_blog_post/plots_training/8e1813be_solutions.pdf]

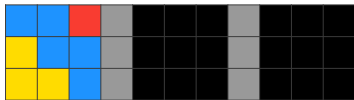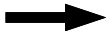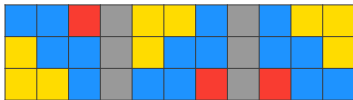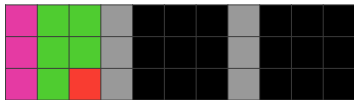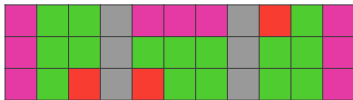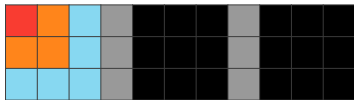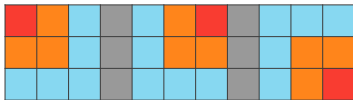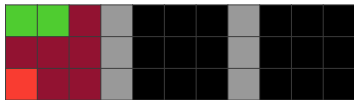

?

Supplement: supplementary_material [file 8e5a5113_problem.pdf › CompressARC/results_for_the_blog_post/plots_training/8e5a5113_problem.pdf]

sample

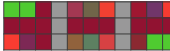

sample average

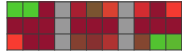

guess 1

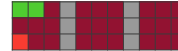

guess 2

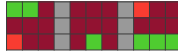

Supplement: supplementary_material [file 8e5a5113_solutions.pdf › CompressARC/results_for_the_blog_post/plots_training/8e5a5113_solutions.pdf]

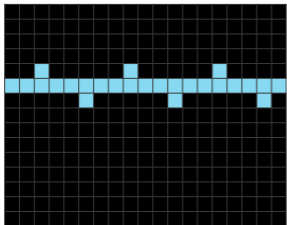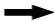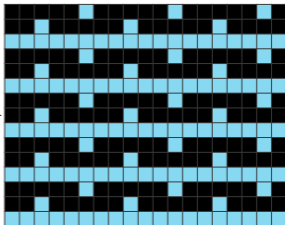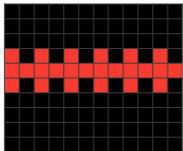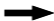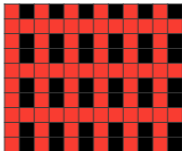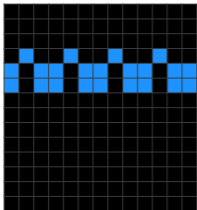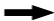

?

Supplement: supplementary_material [file 8eb1be9a_problem.pdf › CompressARC/results_for_the_blog_post/plots_training/8eb1be9a_problem.pdf]

sample

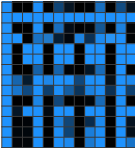

sample average

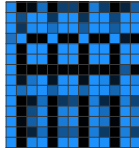

guess 1

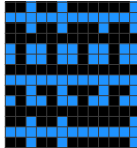

guess 2

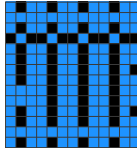

Supplement: supplementary_material [file 8eb1be9a_solutions.pdf › CompressARC/results_for_the_blog_post/plots_training/8eb1be9a_solutions.pdf]

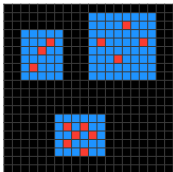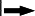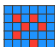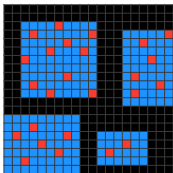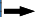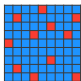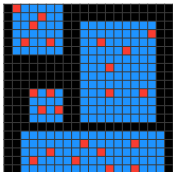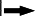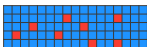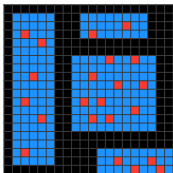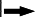

?

Supplement: supplementary_material [file 8efcae92_problem.pdf › CompressARC/results_for_the_blog_post/plots_training/8efcae92_problem.pdf]

sample

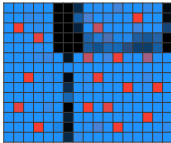

sample average

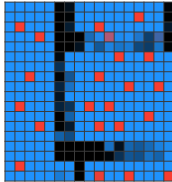

guess 1

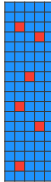

guess 2

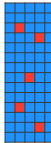

Supplement: supplementary_material [file 8efcae92_solutions.pdf › CompressARC/results_for_the_blog_post/plots_training/8efcae92_solutions.pdf]

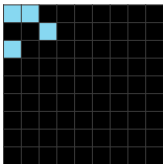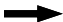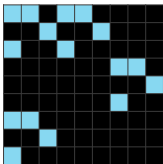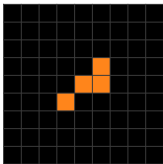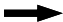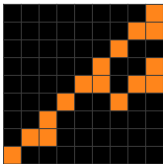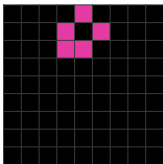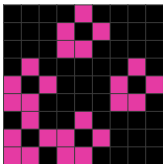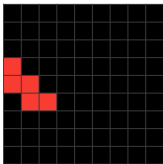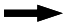

?

Supplement: supplementary_material [file 8f2ea7aa_problem.pdf › CompressARC/results_for_the_blog_post/plots_training/8f2ea7aa_problem.pdf]

sample

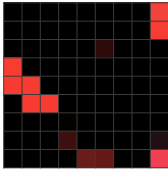

sample average

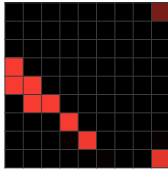

guess 1

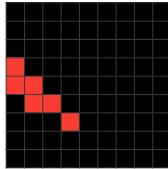

guess 2

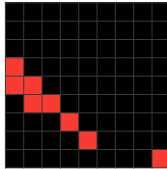

Supplement: supplementary_material [file 8f2ea7aa_solutions.pdf › CompressARC/results_for_the_blog_post/plots_training/8f2ea7aa_solutions.pdf]

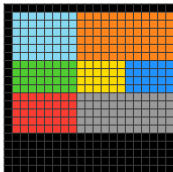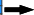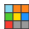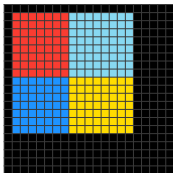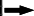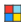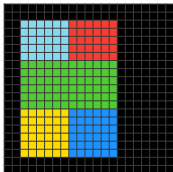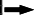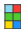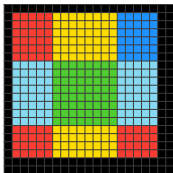

?

Supplement: supplementary_material [file 90c28cc7_problem.pdf › CompressARC/results_for_the_blog_post/plots_training/90c28cc7_problem.pdf]

sample

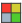

sample average

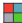

guess 1

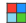

guess 2

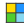

Supplement: supplementary_material [file 90c28cc7_solutions.pdf › CompressARC/results_for_the_blog_post/plots_training/90c28cc7_solutions.pdf]

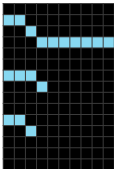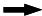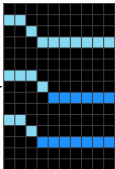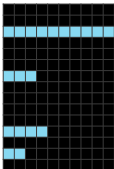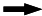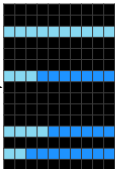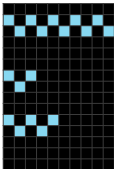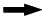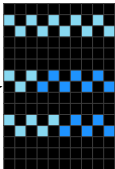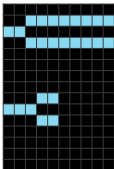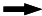

?

Supplement: supplementary_material [file 90f3ed37_problem.pdf › CompressARC/results_for_the_blog_post/plots_training/90f3ed37_problem.pdf]

sample

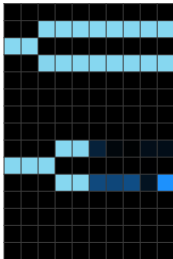

sample average

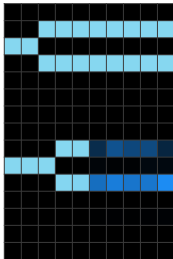

guess 1

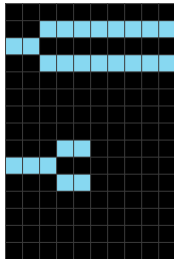

guess 2

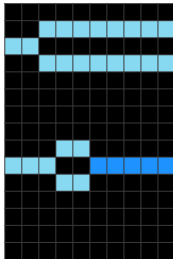

Supplement: supplementary_material [file 90f3ed37_solutions.pdf › CompressARC/results_for_the_blog_post/plots_training/90f3ed37_solutions.pdf]

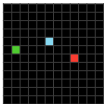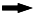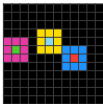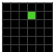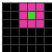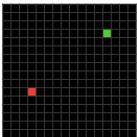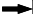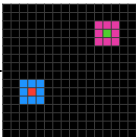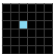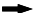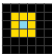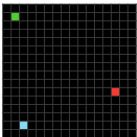

?

Supplement: supplementary_material [file 913fb3ed_problem.pdf › CompressARC/results_for_the_blog_post/plots_training/913fb3ed_problem.pdf]

sample

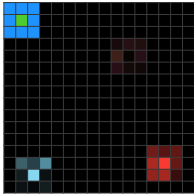

sample average

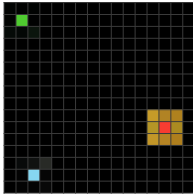

guess 1

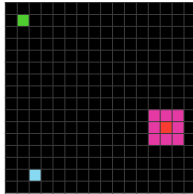

guess 2

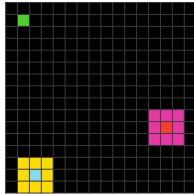

Supplement: supplementary_material [file 913fb3ed_solutions.pdf › CompressARC/results_for_the_blog_post/plots_training/913fb3ed_solutions.pdf]

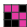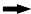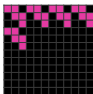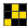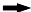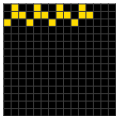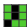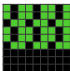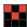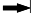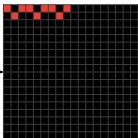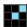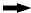

?

Supplement: supplementary_material [file 91413438_problem.pdf › CompressARC/results_for_the_blog_post/plots_training/91413438_problem.pdf]

sample

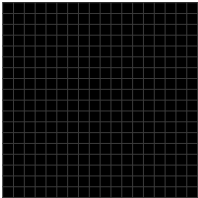

sample average

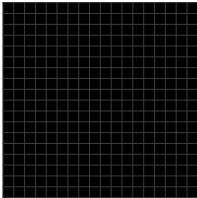

guess 1

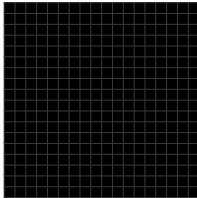

guess 2

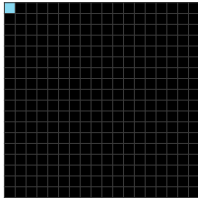

Supplement: supplementary_material [file 91413438_solutions.pdf › CompressARC/results_for_the_blog_post/plots_training/91413438_solutions.pdf]

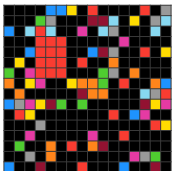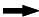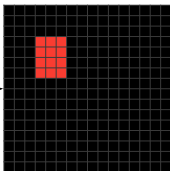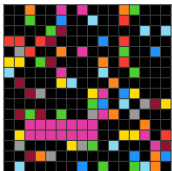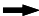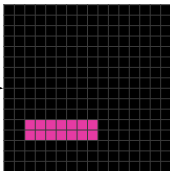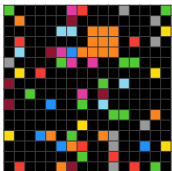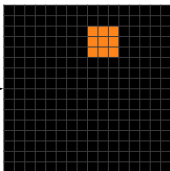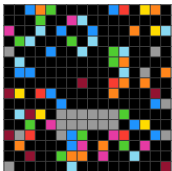

?

Supplement: supplementary_material [file 91714a58_problem.pdf › CompressARC/results_for_the_blog_post/plots_training/91714a58_problem.pdf]

sample

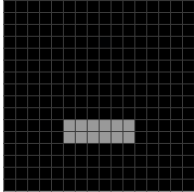

sample average

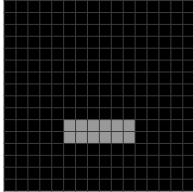

guess 1

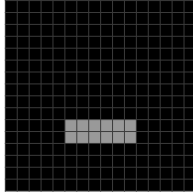

guess 2

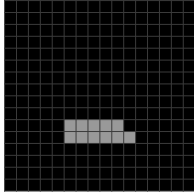

Supplement: supplementary_material [file 91714a58_solutions.pdf › CompressARC/results_for_the_blog_post/plots_training/91714a58_solutions.pdf]

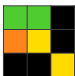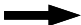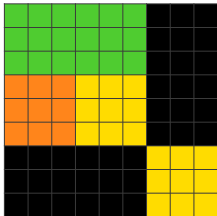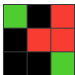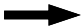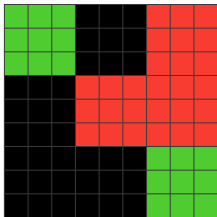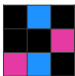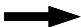

?

Supplement: supplementary_material [file 9172f3a0_problem.pdf › CompressARC/results_for_the_blog_post/plots_training/9172f3a0_problem.pdf]

sample

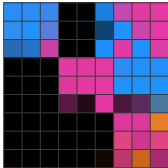

sample average

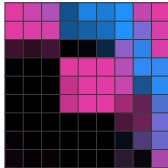

guess 1

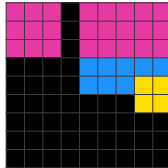

guess 2

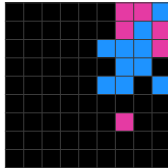

Supplement: supplementary_material [file 9172f3a0_solutions.pdf › CompressARC/results_for_the_blog_post/plots_training/9172f3a0_solutions.pdf]

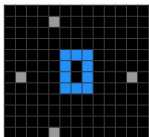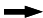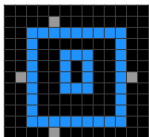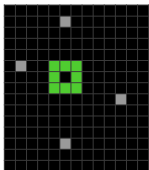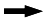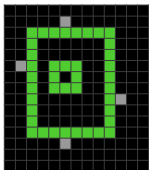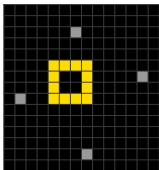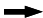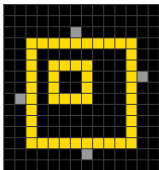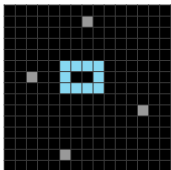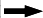

?

Supplement: supplementary_material [file 928ad970_problem.pdf › CompressARC/results_for_the_blog_post/plots_training/928ad970_problem.pdf]

sample

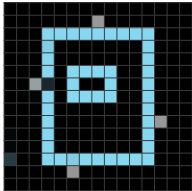

sample average

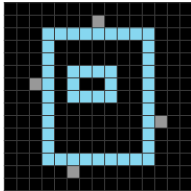

guess 1

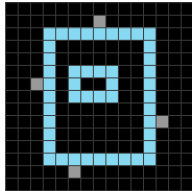

guess 2

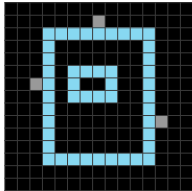

Supplement: supplementary_material [file 928ad970_solutions.pdf › CompressARC/results_for_the_blog_post/plots_training/928ad970_solutions.pdf]

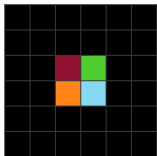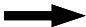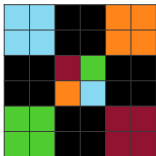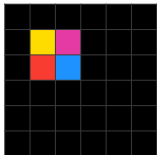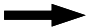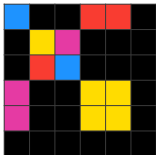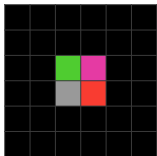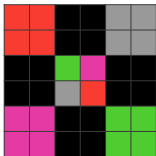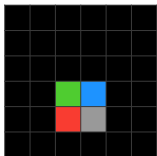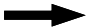

?

Supplement: supplementary_material [file 93b581b8_problem.pdf › CompressARC/results_for_the_blog_post/plots_training/93b581b8_problem.pdf]

sample

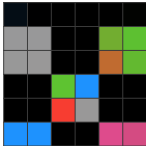

sample average

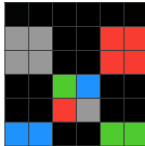

guess 1

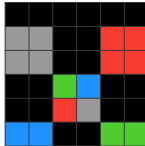

guess 2

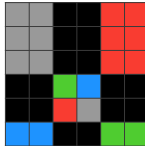

Supplement: supplementary_material [file 93b581b8_solutions.pdf › CompressARC/results_for_the_blog_post/plots_training/93b581b8_solutions.pdf]

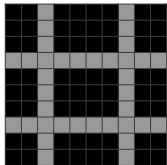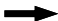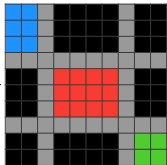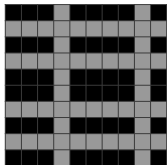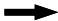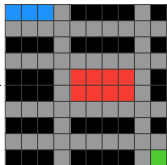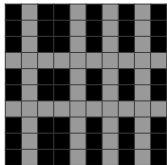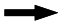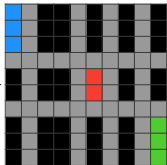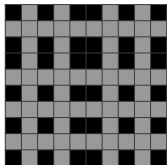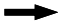

?

Supplement: supplementary_material [file 941d9a10_problem.pdf › CompressARC/results_for_the_blog_post/plots_training/941d9a10_problem.pdf]

sample

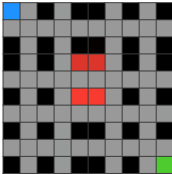

sample average

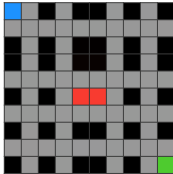

guess 1

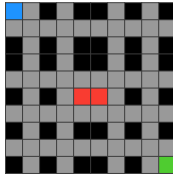

guess 2

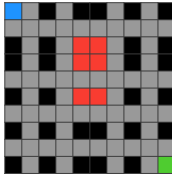

Supplement: supplementary_material [file 941d9a10_solutions.pdf › CompressARC/results_for_the_blog_post/plots_training/941d9a10_solutions.pdf]

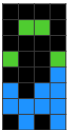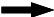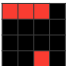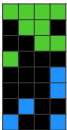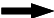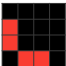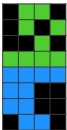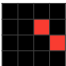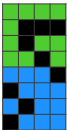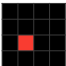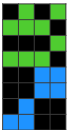

?

Supplement: supplementary_material [file 94f9d214_problem.pdf › CompressARC/results_for_the_blog_post/plots_training/94f9d214_problem.pdf]

sample

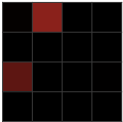

sample average

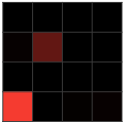

guess 1

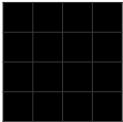

guess 2

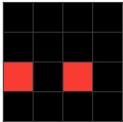

Supplement: supplementary_material [file 94f9d214_solutions.pdf › CompressARC/results_for_the_blog_post/plots_training/94f9d214_solutions.pdf]

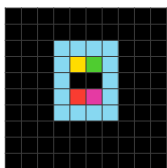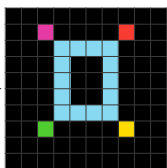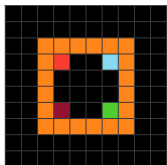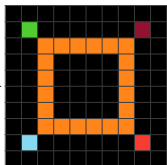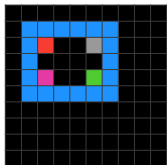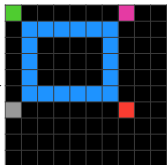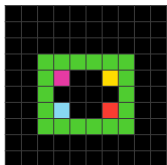

?

Supplement: supplementary_material [file 952a094c_problem.pdf › CompressARC/results_for_the_blog_post/plots_training/952a094c_problem.pdf]

sample

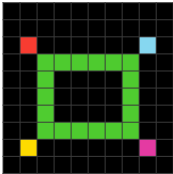

sample average

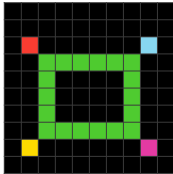

guess 1

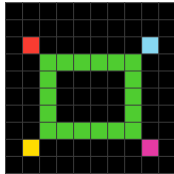

guess 2

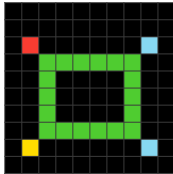

Supplement: supplementary_material [file 952a094c_solutions.pdf › CompressARC/results_for_the_blog_post/plots_training/952a094c_solutions.pdf]

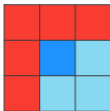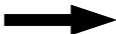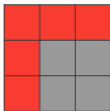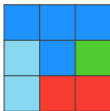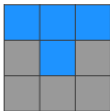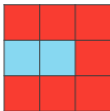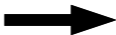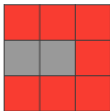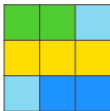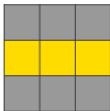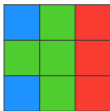

?

Supplement: supplementary_material [file 9565186b_problem.pdf › CompressARC/results_for_the_blog_post/plots_training/9565186b_problem.pdf]

sample

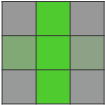

sample average

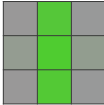

guess 1

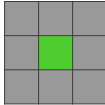

guess 2

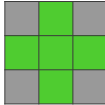

Supplement: supplementary_material [file 9565186b_solutions.pdf › CompressARC/results_for_the_blog_post/plots_training/9565186b_solutions.pdf]

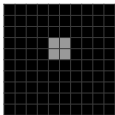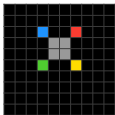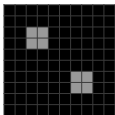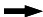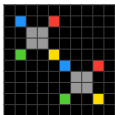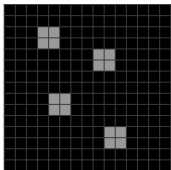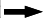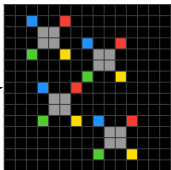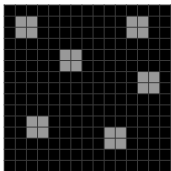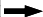

?

Supplement: supplementary_material [file 95990924_problem.pdf › CompressARC/results_for_the_blog_post/plots_training/95990924_problem.pdf]

sample

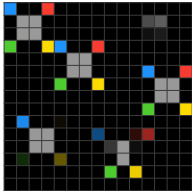

sample average

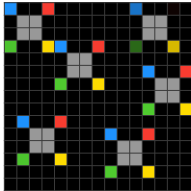

guess 1

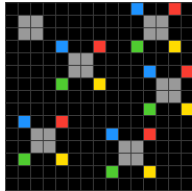

guess 2

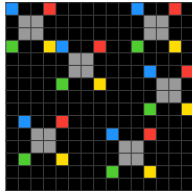

Supplement: supplementary_material [file 95990924_solutions.pdf › CompressARC/results_for_the_blog_post/plots_training/95990924_solutions.pdf]

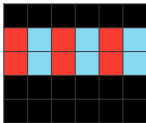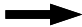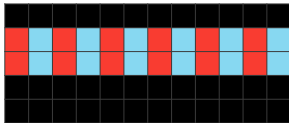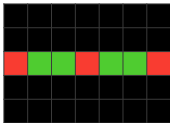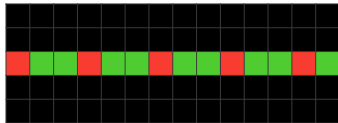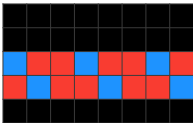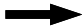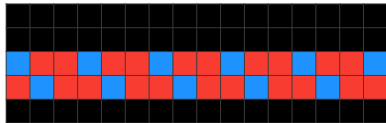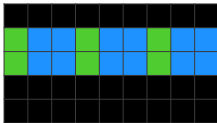

?

Supplement: supplementary_material [file 963e52fc_problem.pdf › CompressARC/results_for_the_blog_post/plots_training/963e52fc_problem.pdf]

sample

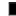

sample average

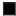

guess 1

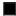

guess 2

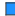

Supplement: supplementary_material [file 963e52fc_solutions.pdf › CompressARC/results_for_the_blog_post/plots_training/963e52fc_solutions.pdf]

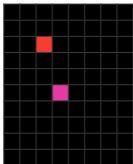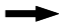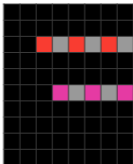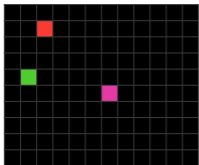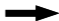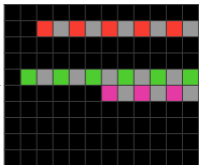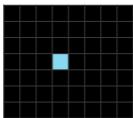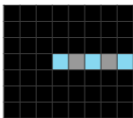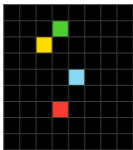

?

Supplement: supplementary_material [file 97999447_problem.pdf › CompressARC/results_for_the_blog_post/plots_training/97999447_problem.pdf]

sample

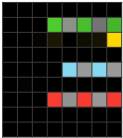

sample average

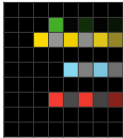

guess 1

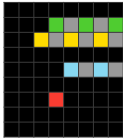

guess 2

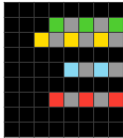

Supplement: supplementary_material [file 97999447_solutions.pdf › CompressARC/results_for_the_blog_post/plots_training/97999447_solutions.pdf]

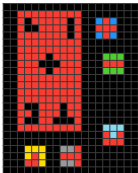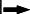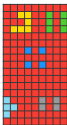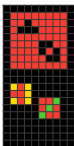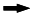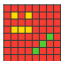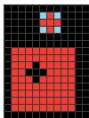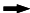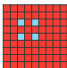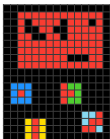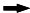

?

Supplement: supplementary_material [file 97a05b5b_problem.pdf › CompressARC/results_for_the_blog_post/plots_training/97a05b5b_problem.pdf]

sample

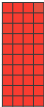

sample average

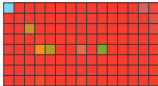

guess 1

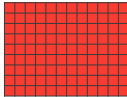

guess 2

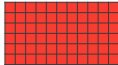

Supplement: supplementary_material [file 97a05b5b_solutions.pdf › CompressARC/results_for_the_blog_post/plots_training/97a05b5b_solutions.pdf]

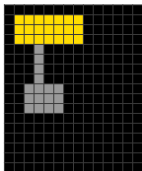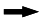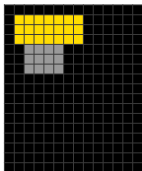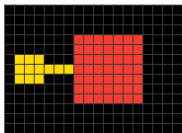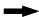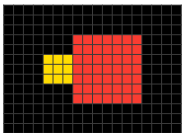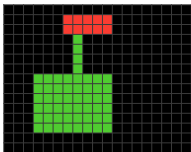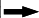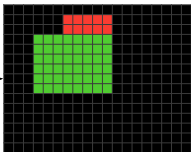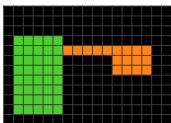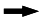

?

Supplement: supplementary_material [file 98cf29f8_problem.pdf › CompressARC/results_for_the_blog_post/plots_training/98cf29f8_problem.pdf]

sample

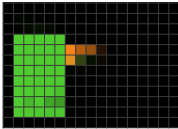

sample average

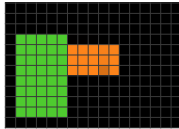

guess 1

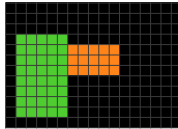

guess 2

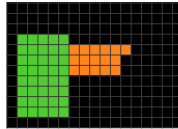

Supplement: supplementary_material [file 98cf29f8_solutions.pdf › CompressARC/results_for_the_blog_post/plots_training/98cf29f8_solutions.pdf]

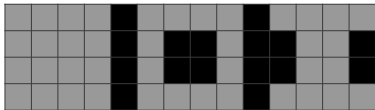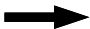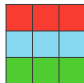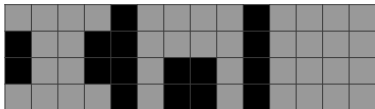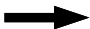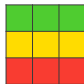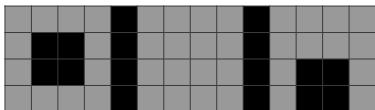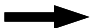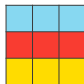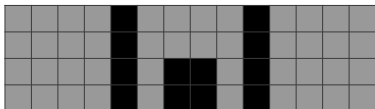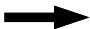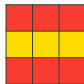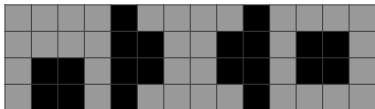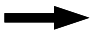

?

Supplement: supplementary_material [file 995c5fa3_problem.pdf › CompressARC/results_for_the_blog_post/plots_training/995c5fa3_problem.pdf]

sample

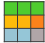

sample average

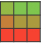

guess 1

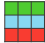

guess 2

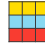

Supplement: supplementary_material [file 995c5fa3_solutions.pdf › CompressARC/results_for_the_blog_post/plots_training/995c5fa3_solutions.pdf]

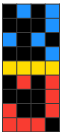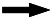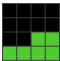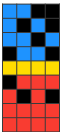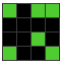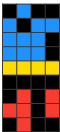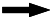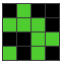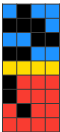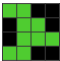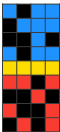

?

Supplement: supplementary_material [file 99b1bc43_problem.pdf › CompressARC/results_for_the_blog_post/plots_training/99b1bc43_problem.pdf]

sample

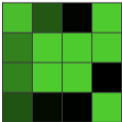

sample average

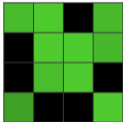

guess 1

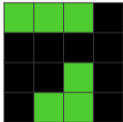

guess 2

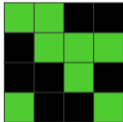

Supplement: supplementary_material [file 99b1bc43_solutions.pdf › CompressARC/results_for_the_blog_post/plots_training/99b1bc43_solutions.pdf]

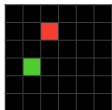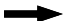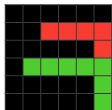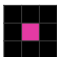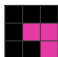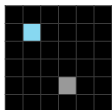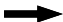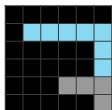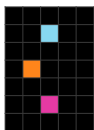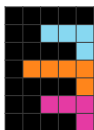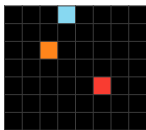

?

Supplement: supplementary_material [file 99fa7670_problem.pdf › CompressARC/results_for_the_blog_post/plots_training/99fa7670_problem.pdf]

sample

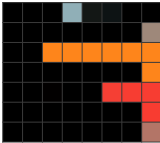

sample average

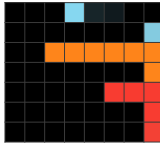

guess 1

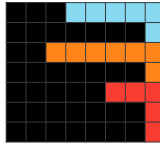

guess 2

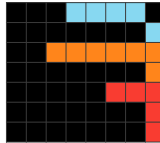

Supplement: supplementary_material [file 99fa7670_solutions.pdf › CompressARC/results_for_the_blog_post/plots_training/99fa7670_solutions.pdf]

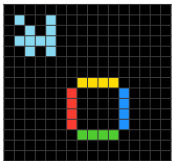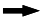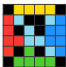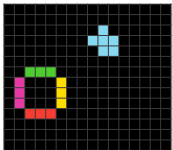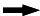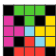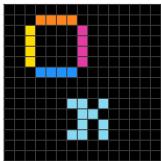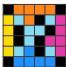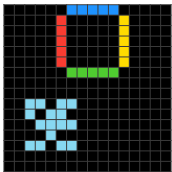

?

Supplement: supplementary_material [file 9aec4887_problem.pdf › CompressARC/results_for_the_blog_post/plots_training/9aec4887_problem.pdf]

sample

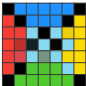

sample average

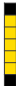

guess 1

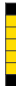

guess 2

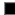

Supplement: supplementary_material [file 9aec4887_solutions.pdf › CompressARC/results_for_the_blog_post/plots_training/9aec4887_solutions.pdf]

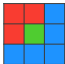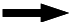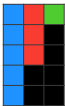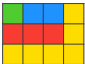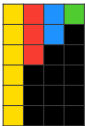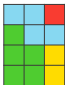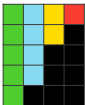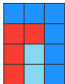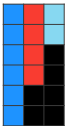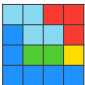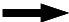

?

Supplement: supplementary_material [file 9af7a82c_problem.pdf › CompressARC/results_for_the_blog_post/plots_training/9af7a82c_problem.pdf]

sample

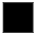

sample average

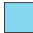

guess 1

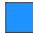

guess 2

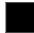

Supplement: supplementary_material [file 9af7a82c_solutions.pdf › CompressARC/results_for_the_blog_post/plots_training/9af7a82c_solutions.pdf]

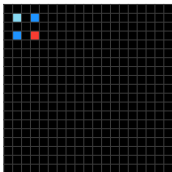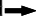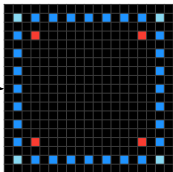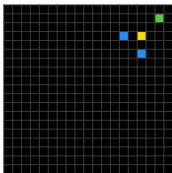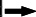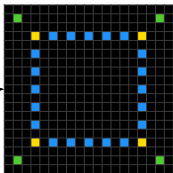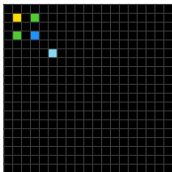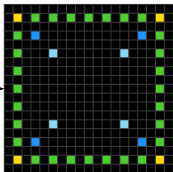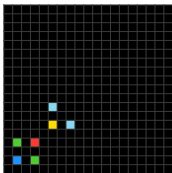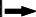

?

Supplement: supplementary_material [file 9d9215db_problem.pdf › CompressARC/results_for_the_blog_post/plots_training/9d9215db_problem.pdf]

sample

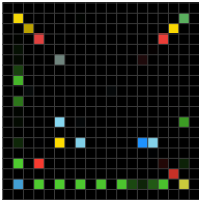

sample average

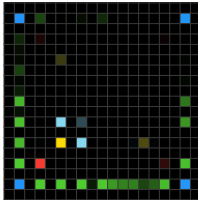

guess 1

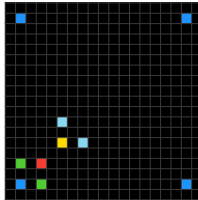

guess 2

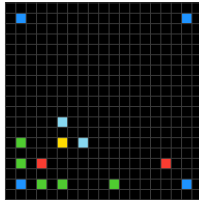

Supplement: supplementary_material [file 9d9215db_solutions.pdf › CompressARC/results_for_the_blog_post/plots_training/9d9215db_solutions.pdf]

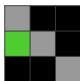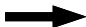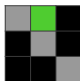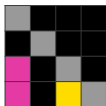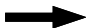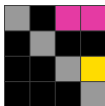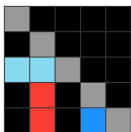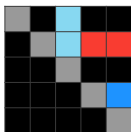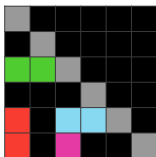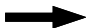

?

Supplement: supplementary_material [file 9dfd6313_problem.pdf › CompressARC/results_for_the_blog_post/plots_training/9dfd6313_problem.pdf]

sample

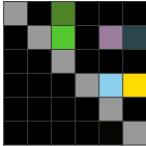

sample average

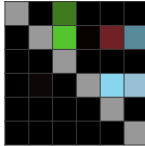

guess 1

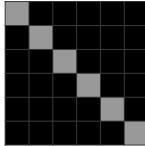

guess 2

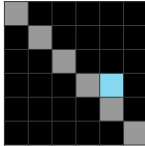

Supplement: supplementary_material [file 9dfd6313_solutions.pdf › CompressARC/results_for_the_blog_post/plots_training/9dfd6313_solutions.pdf]

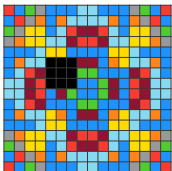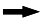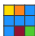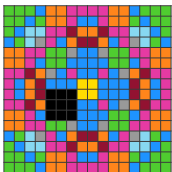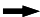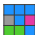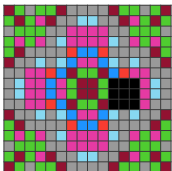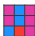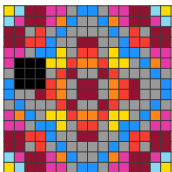

?

Supplement: supplementary_material [file 9ecd008a_problem.pdf › CompressARC/results_for_the_blog_post/plots_training/9ecd008a_problem.pdf]

sample

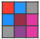

sample average

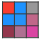

guess 1

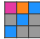

guess 2

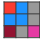

Supplement: supplementary_material [file 9ecd008a_solutions.pdf › CompressARC/results_for_the_blog_post/plots_training/9ecd008a_solutions.pdf]

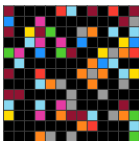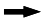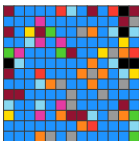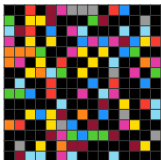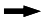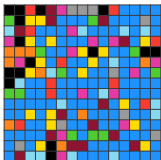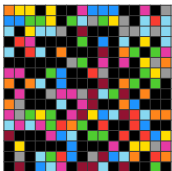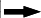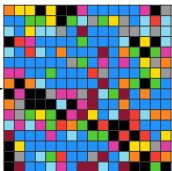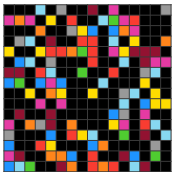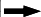

?

Supplement: supplementary_material [file 9edfc990_problem.pdf › CompressARC/results_for_the_blog_post/plots_training/9edfc990_problem.pdf]

sample

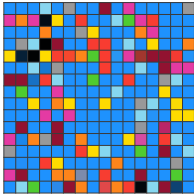

sample average

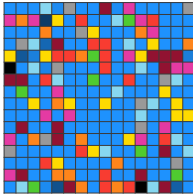

guess 1

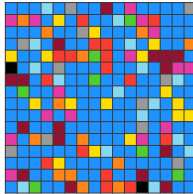

guess 2

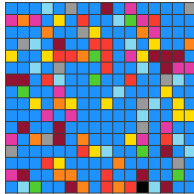

Supplement: supplementary_material [file 9edfc990_solutions.pdf › CompressARC/results_for_the_blog_post/plots_training/9edfc990_solutions.pdf]

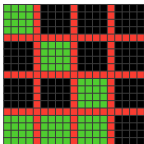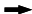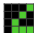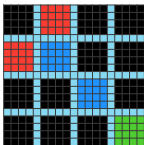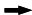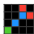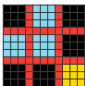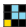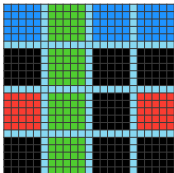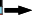

?

Supplement: supplementary_material [file 9f236235_problem.pdf › CompressARC/results_for_the_blog_post/plots_training/9f236235_problem.pdf]

sample

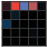

sample average

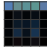

guess 1

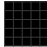

guess 2

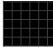

Supplement: supplementary_material [file 9f236235_solutions.pdf › CompressARC/results_for_the_blog_post/plots_training/9f236235_solutions.pdf]

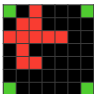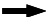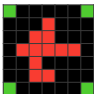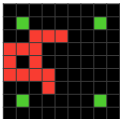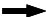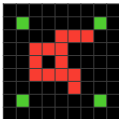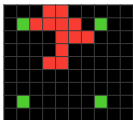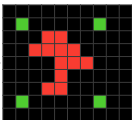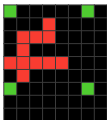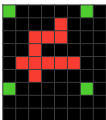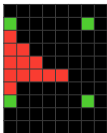

?

Supplement: supplementary_material [file a1570a43_problem.pdf › CompressARC/results_for_the_blog_post/plots_training/a1570a43_problem.pdf]

sample

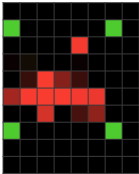

sample average

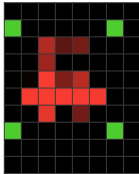

guess 1

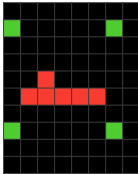

guess 2

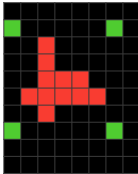

Supplement: supplementary_material [file a1570a43_solutions.pdf › CompressARC/results_for_the_blog_post/plots_training/a1570a43_solutions.pdf]

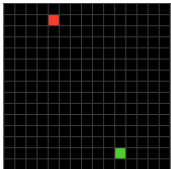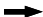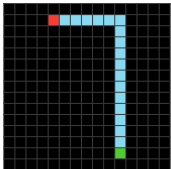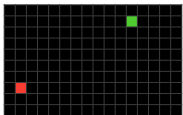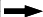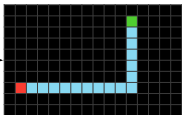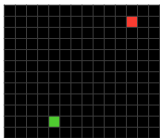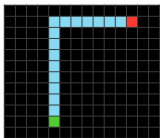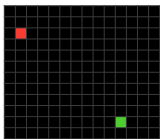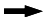

?

Supplement: supplementary_material [file a2fd1cf0_problem.pdf › CompressARC/results_for_the_blog_post/plots_training/a2fd1cf0_problem.pdf]

sample

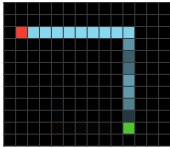

sample average

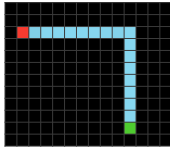

guess 1

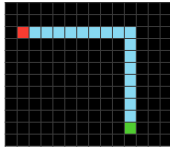

guess 2

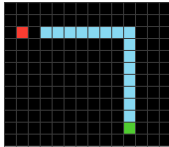

Supplement: supplementary_material [file a2fd1cf0_solutions.pdf › CompressARC/results_for_the_blog_post/plots_training/a2fd1cf0_solutions.pdf]

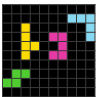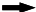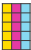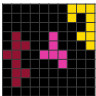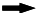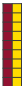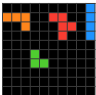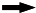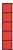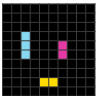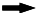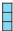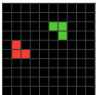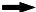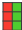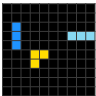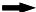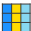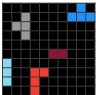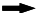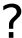

Supplement: supplementary_material [file a3325580_problem.pdf › CompressARC/results_for_the_blog_post/plots_training/a3325580_problem.pdf]

sample

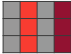

sample average

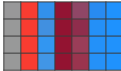

guess 1

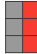

guess 2

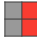

Supplement: supplementary_material [file a3325580_solutions.pdf › CompressARC/results_for_the_blog_post/plots_training/a3325580_solutions.pdf]

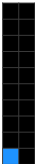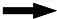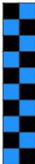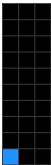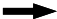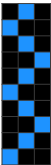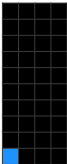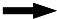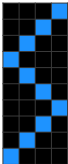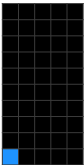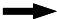

?

Supplement: supplementary_material [file a3df8b1e_problem.pdf › CompressARC/results_for_the_blog_post/plots_training/a3df8b1e_problem.pdf]

sample

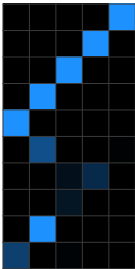

sample average

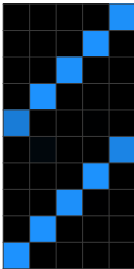

guess 1

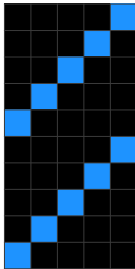

guess 2

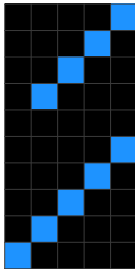

Supplement: supplementary_material [file a3df8b1e_solutions.pdf › CompressARC/results_for_the_blog_post/plots_training/a3df8b1e_solutions.pdf]

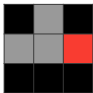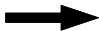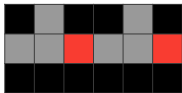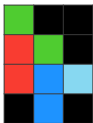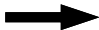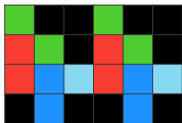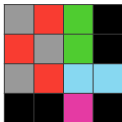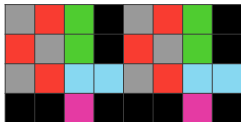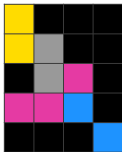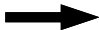

?

Supplement: supplementary_material [file a416b8f3_problem.pdf › CompressARC/results_for_the_blog_post/plots_training/a416b8f3_problem.pdf]

sample

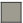

sample average

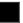

guess 1

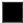

guess 2

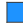

Supplement: supplementary_material [file a416b8f3_solutions.pdf › CompressARC/results_for_the_blog_post/plots_training/a416b8f3_solutions.pdf]

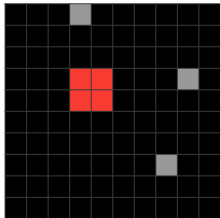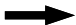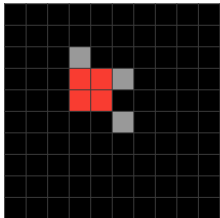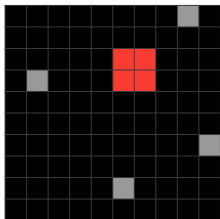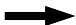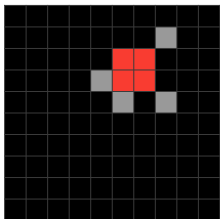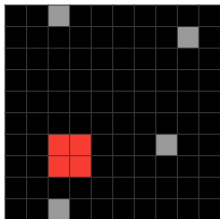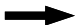

?

Supplement: supplementary_material [file a48eeaf7_problem.pdf › CompressARC/results_for_the_blog_post/plots_training/a48eeaf7_problem.pdf]

sample

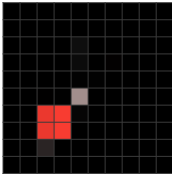

sample average

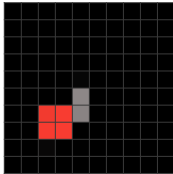

guess 1

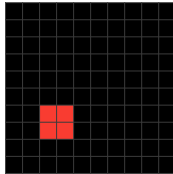

guess 2

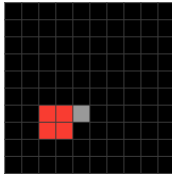

Supplement: supplementary_material [file a48eeaf7_solutions.pdf › CompressARC/results_for_the_blog_post/plots_training/a48eeaf7_solutions.pdf]

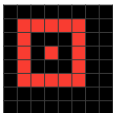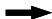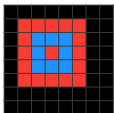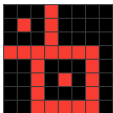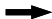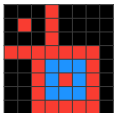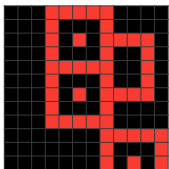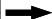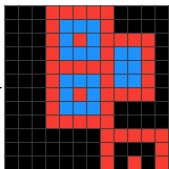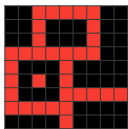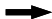

?

Supplement: supplementary_material [file a5313dff_problem.pdf › CompressARC/results_for_the_blog_post/plots_training/a5313dff_problem.pdf]

sample

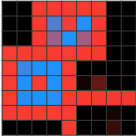

sample average

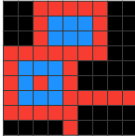

guess 1

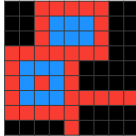

guess 2

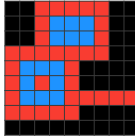

Supplement: supplementary_material [file a5313dff_solutions.pdf › CompressARC/results_for_the_blog_post/plots_training/a5313dff_solutions.pdf]

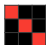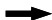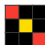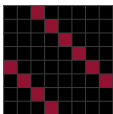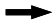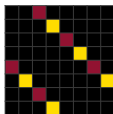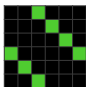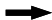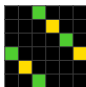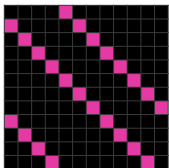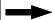

?

Supplement: supplementary_material [file a5f85a15_problem.pdf › CompressARC/results_for_the_blog_post/plots_training/a5f85a15_problem.pdf]
