# Supplementary material (part 3 of 17)
Source: ML conference proceedings conference paper supplement (https://openreview.net/forum?id=jLC662Yo5h)

sample

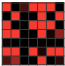

sample average

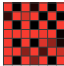

guess 1

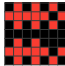

guess 2

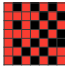

Supplement: supplementary_material [file 1990f7a8_solutions.pdf › CompressARC/results_for_the_blog_post/plots_evaluation/1990f7a8_solutions.pdf]

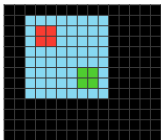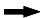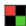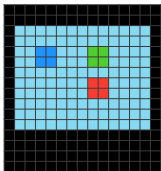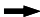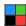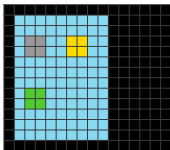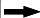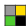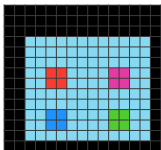

?

Supplement: supplementary_material [file 19bb5feb_problem.pdf › CompressARC/results_for_the_blog_post/plots_evaluation/19bb5feb_problem.pdf]

sample

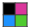

sample average

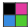

guess 1

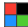

guess 2

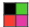

Supplement: supplementary_material [file 19bb5feb_solutions.pdf › CompressARC/results_for_the_blog_post/plots_evaluation/19bb5feb_solutions.pdf]

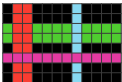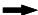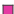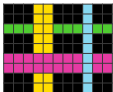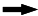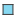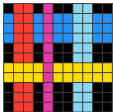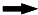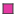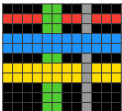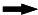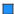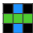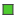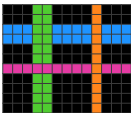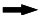

?

Supplement: supplementary_material [file 1a2e2828_problem.pdf › CompressARC/results_for_the_blog_post/plots_evaluation/1a2e2828_problem.pdf]

sample

sample average

guess 1

guess 2

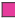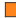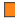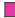

Supplement: supplementary_material [file 1a2e2828_solutions.pdf › CompressARC/results_for_the_blog_post/plots_evaluation/1a2e2828_solutions.pdf]

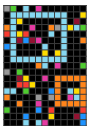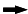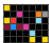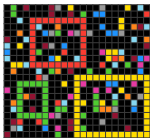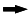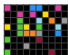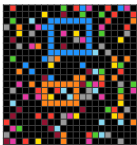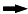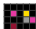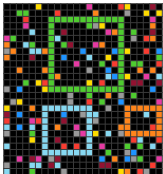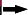

?

Supplement: supplementary_material [file 1a6449f1_problem.pdf › CompressARC/results_for_the_blog_post/plots_evaluation/1a6449f1_problem.pdf]

sample

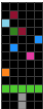

sample average

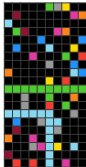

guess 1

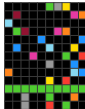

guess 2

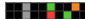

Supplement: supplementary_material [file 1a6449f1_solutions.pdf › CompressARC/results_for_the_blog_post/plots_evaluation/1a6449f1_solutions.pdf]

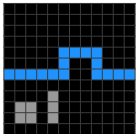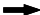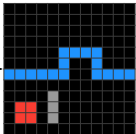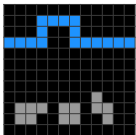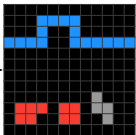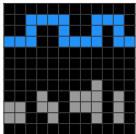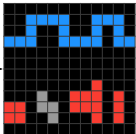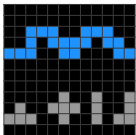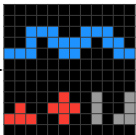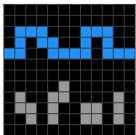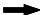

?

Supplement: supplementary_material [file 1acc24af_problem.pdf › CompressARC/results_for_the_blog_post/plots_evaluation/1acc24af_problem.pdf]

sample

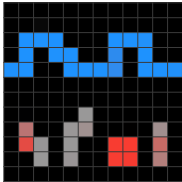

sample average

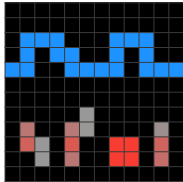

guess 1

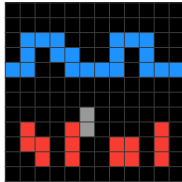

guess 2

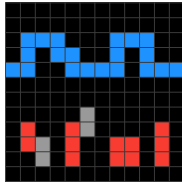

Supplement: supplementary_material [file 1acc24af_solutions.pdf › CompressARC/results_for_the_blog_post/plots_evaluation/1acc24af_solutions.pdf]

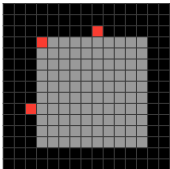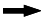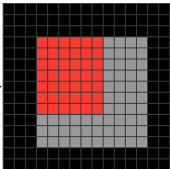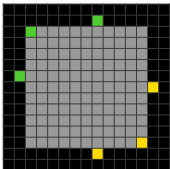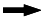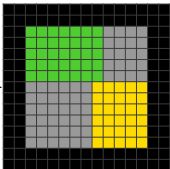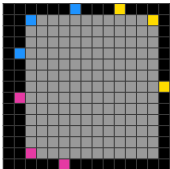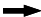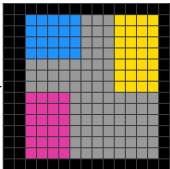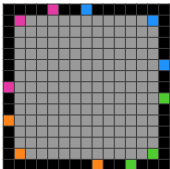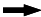

?

Supplement: supplementary_material [file 1c02dbbe_problem.pdf › CompressARC/results_for_the_blog_post/plots_evaluation/1c02dbbe_problem.pdf]

sample

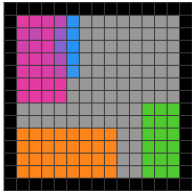

sample average

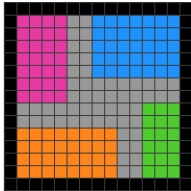

guess 1

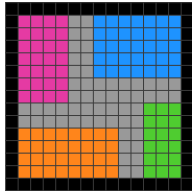

guess 2

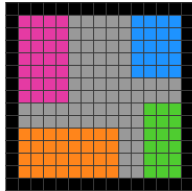

Supplement: supplementary_material [file 1c02dbbe_solutions.pdf › CompressARC/results_for_the_blog_post/plots_evaluation/1c02dbbe_solutions.pdf]

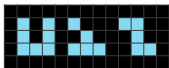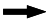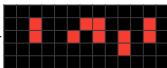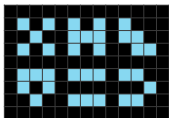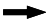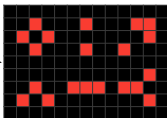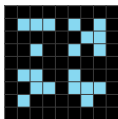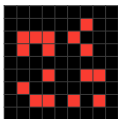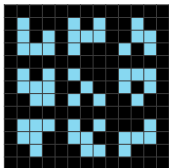

?

Supplement: supplementary_material [file 1c0d0a4b_problem.pdf › CompressARC/results_for_the_blog_post/plots_evaluation/1c0d0a4b_problem.pdf]

sample

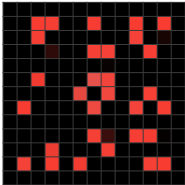

sample average

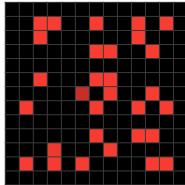

guess 1

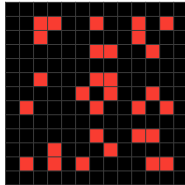

guess 2

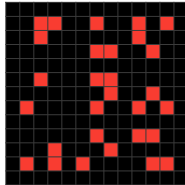

Supplement: supplementary_material [file 1c0d0a4b_solutions.pdf › CompressARC/results_for_the_blog_post/plots_evaluation/1c0d0a4b_solutions.pdf]

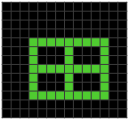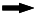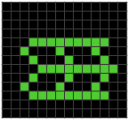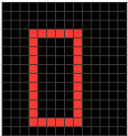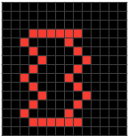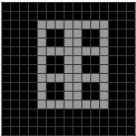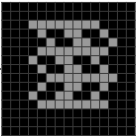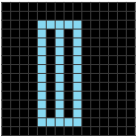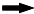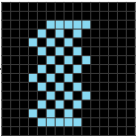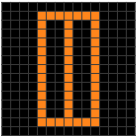

?

Supplement: supplementary_material [file 1c56ad9f_problem.pdf › CompressARC/results_for_the_blog_post/plots_evaluation/1c56ad9f_problem.pdf]

sample

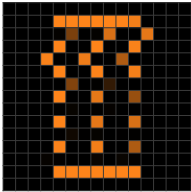

sample average

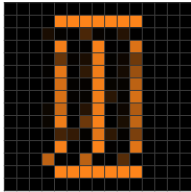

guess 1

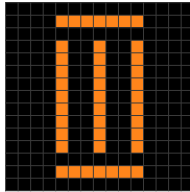

guess 2

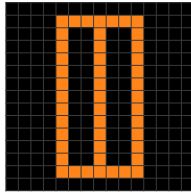

Supplement: supplementary_material [file 1c56ad9f_solutions.pdf › CompressARC/results_for_the_blog_post/plots_evaluation/1c56ad9f_solutions.pdf]

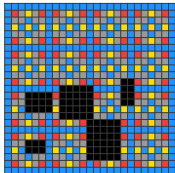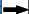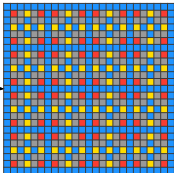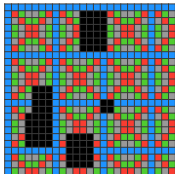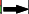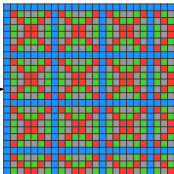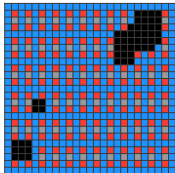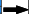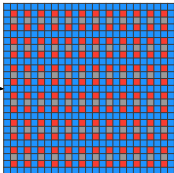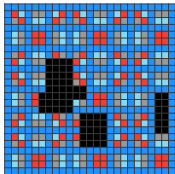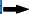

?

Supplement: supplementary_material [file 1d0a4b61_problem.pdf › CompressARC/results_for_the_blog_post/plots_evaluation/1d0a4b61_problem.pdf]

sample

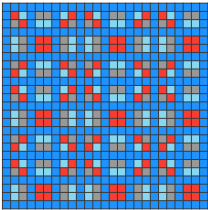

sample average

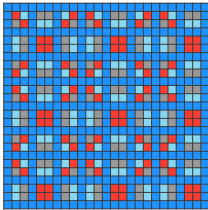

guess 1

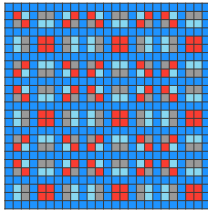

guess 2

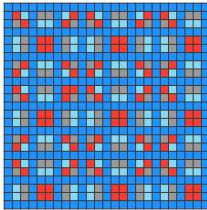

Supplement: supplementary_material [file 1d0a4b61_solutions.pdf › CompressARC/results_for_the_blog_post/plots_evaluation/1d0a4b61_solutions.pdf]

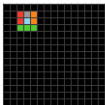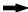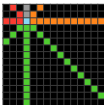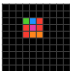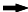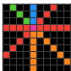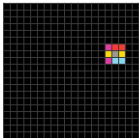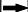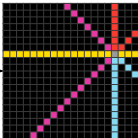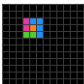

?

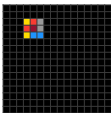

?

Supplement: supplementary_material [file 1d398264_problem.pdf › CompressARC/results_for_the_blog_post/plots_evaluation/1d398264_problem.pdf]

sample

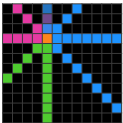

sample average

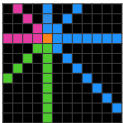

guess 1

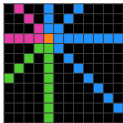

guess 2

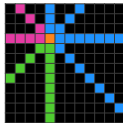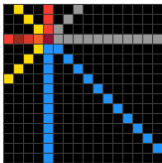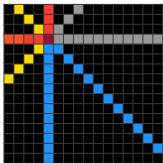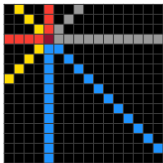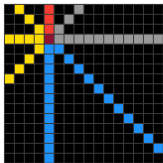

Supplement: supplementary_material [file 1d398264_solutions.pdf › CompressARC/results_for_the_blog_post/plots_evaluation/1d398264_solutions.pdf]

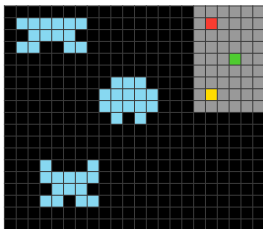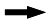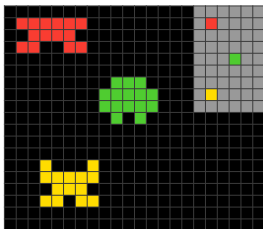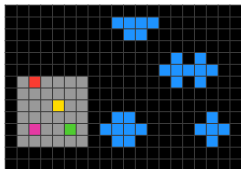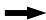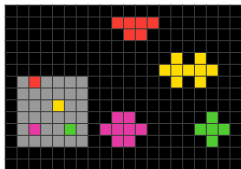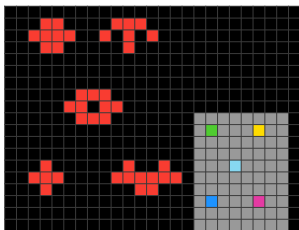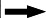

?

Supplement: supplementary_material [file 1da012fc_problem.pdf › CompressARC/results_for_the_blog_post/plots_evaluation/1da012fc_problem.pdf]

sample

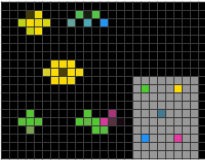

sample average

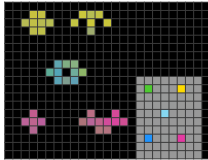

guess 1

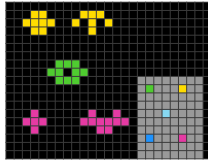

guess 2

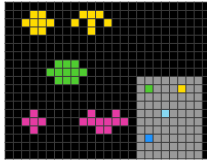

Supplement: supplementary_material [file 1da012fc_solutions.pdf › CompressARC/results_for_the_blog_post/plots_evaluation/1da012fc_solutions.pdf]

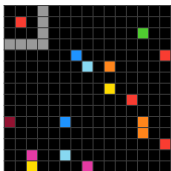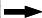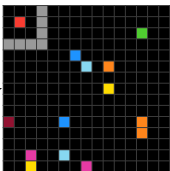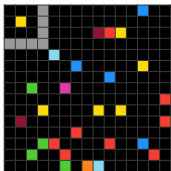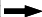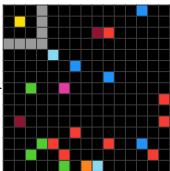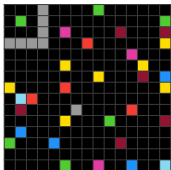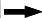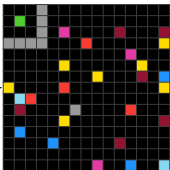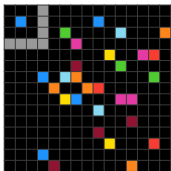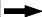

?

Supplement: supplementary_material [file 1e81d6f9_problem.pdf › CompressARC/results_for_the_blog_post/plots_evaluation/1e81d6f9_problem.pdf]

sample

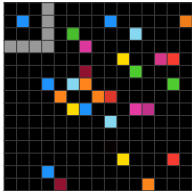

sample average

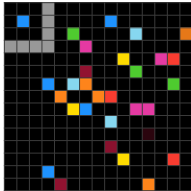

guess 1

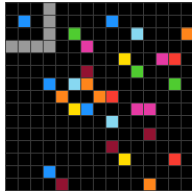

guess 2

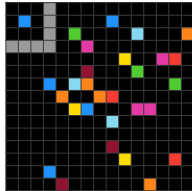

Supplement: supplementary_material [file 1e81d6f9_solutions.pdf › CompressARC/results_for_the_blog_post/plots_evaluation/1e81d6f9_solutions.pdf]

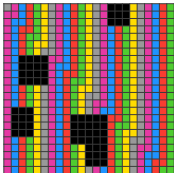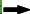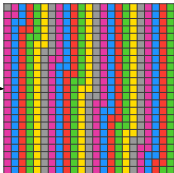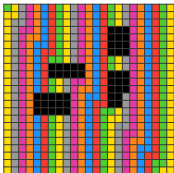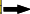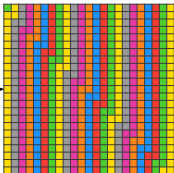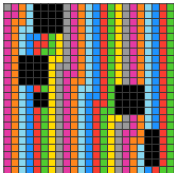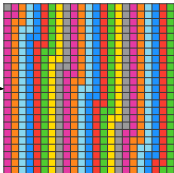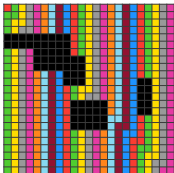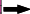

?

Supplement: supplementary_material [file 1e97544e_problem.pdf › CompressARC/results_for_the_blog_post/plots_evaluation/1e97544e_problem.pdf]

sample

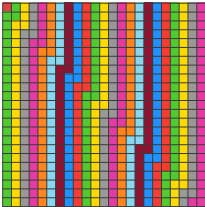

sample average

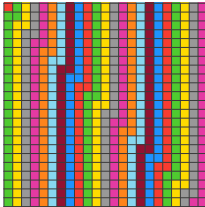

guess 1

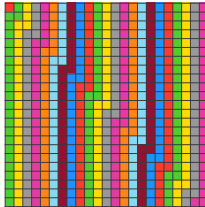

guess 2

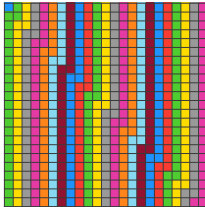

Supplement: supplementary_material [file 1e97544e_solutions.pdf › CompressARC/results_for_the_blog_post/plots_evaluation/1e97544e_solutions.pdf]

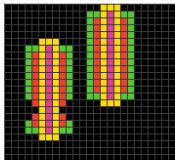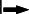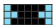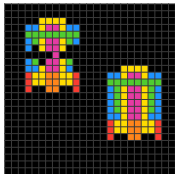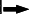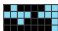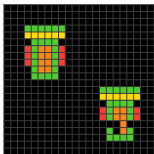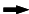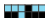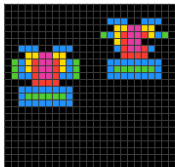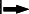

?

Supplement: supplementary_material [file 2037f2c7_problem.pdf › CompressARC/results_for_the_blog_post/plots_evaluation/2037f2c7_problem.pdf]

sample

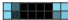

sample average

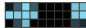

guess 1

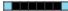

guess 2

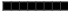

Supplement: supplementary_material [file 2037f2c7_solutions.pdf › CompressARC/results_for_the_blog_post/plots_evaluation/2037f2c7_solutions.pdf]

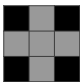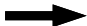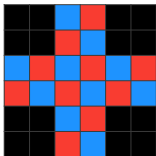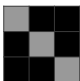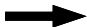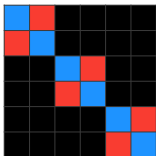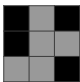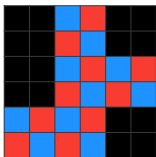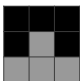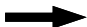

?

Supplement: supplementary_material [file 2072aba6_problem.pdf › CompressARC/results_for_the_blog_post/plots_evaluation/2072aba6_problem.pdf]

sample

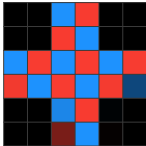

sample average

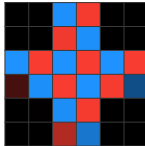

guess 1

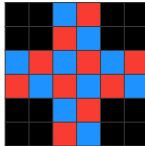

guess 2

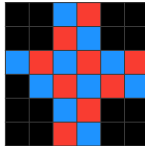

Supplement: supplementary_material [file 2072aba6_solutions.pdf › CompressARC/results_for_the_blog_post/plots_evaluation/2072aba6_solutions.pdf]

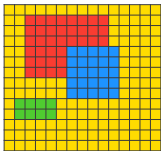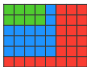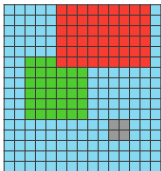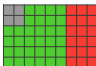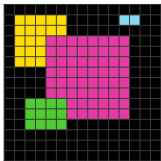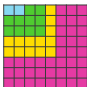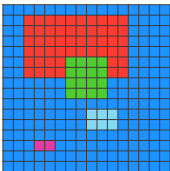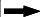

?

Supplement: supplementary_material [file 20818e16_problem.pdf › CompressARC/results_for_the_blog_post/plots_evaluation/20818e16_problem.pdf]

sample

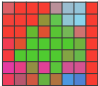

sample average

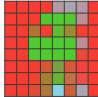

guess 1

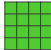

guess 2

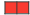

Supplement: supplementary_material [file 20818e16_solutions.pdf › CompressARC/results_for_the_blog_post/plots_evaluation/20818e16_solutions.pdf]

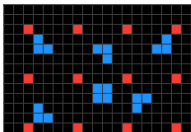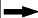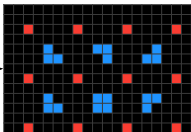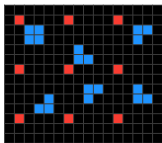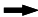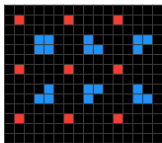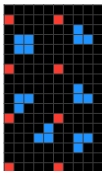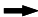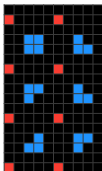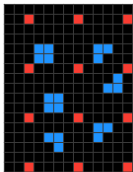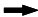

?

Supplement: supplementary_material [file 20981f0e_problem.pdf › CompressARC/results_for_the_blog_post/plots_evaluation/20981f0e_problem.pdf]

sample

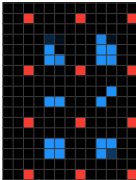

sample average

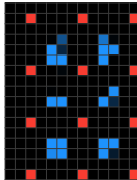

guess 1

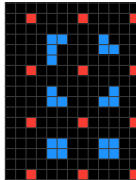

guess 2

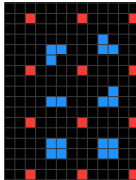

Supplement: supplementary_material [file 20981f0e_solutions.pdf › CompressARC/results_for_the_blog_post/plots_evaluation/20981f0e_solutions.pdf]

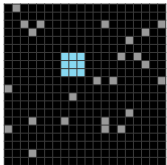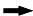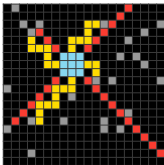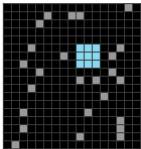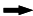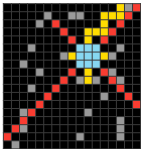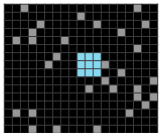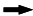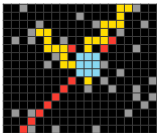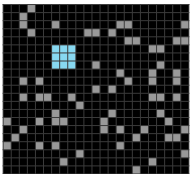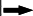

?

Supplement: supplementary_material [file 212895b5_problem.pdf › CompressARC/results_for_the_blog_post/plots_evaluation/212895b5_problem.pdf]

sample

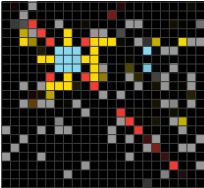

sample average

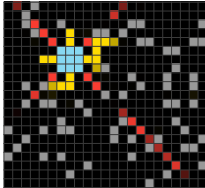

guess 1

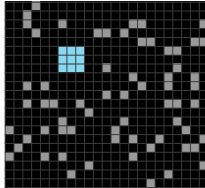

guess 2

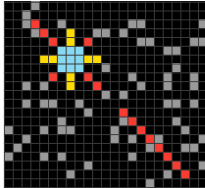

Supplement: supplementary_material [file 212895b5_solutions.pdf › CompressARC/results_for_the_blog_post/plots_evaluation/212895b5_solutions.pdf]

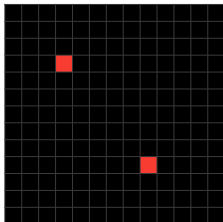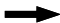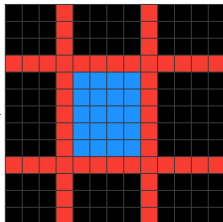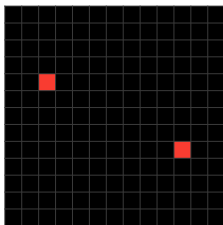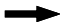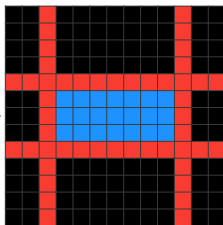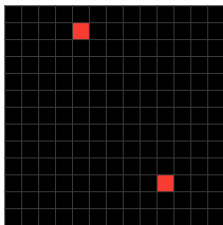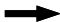

?

Supplement: supplementary_material [file 21f83797_problem.pdf › CompressARC/results_for_the_blog_post/plots_evaluation/21f83797_problem.pdf]

sample

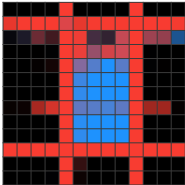

sample average

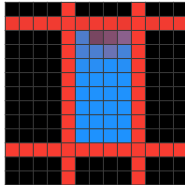

guess 1

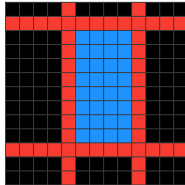

guess 2

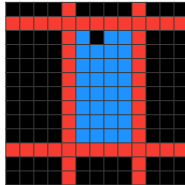

Supplement: supplementary_material [file 21f83797_solutions.pdf › CompressARC/results_for_the_blog_post/plots_evaluation/21f83797_solutions.pdf]

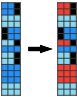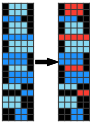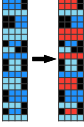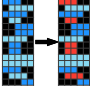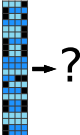

Supplement: supplementary_material [file 22a4bbc2_problem.pdf › CompressARC/results_for_the_blog_post/plots_evaluation/22a4bbc2_problem.pdf]

sample

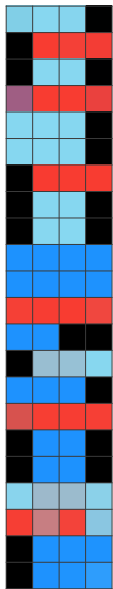

sample average

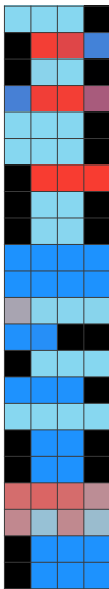

guess 1

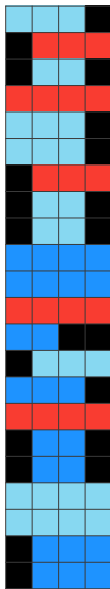

guess 2

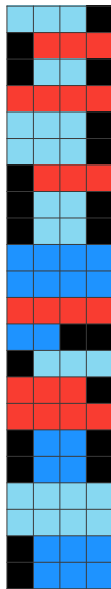

Supplement: supplementary_material [file 22a4bbc2_solutions.pdf › CompressARC/results_for_the_blog_post/plots_evaluation/22a4bbc2_solutions.pdf]

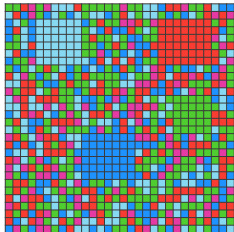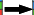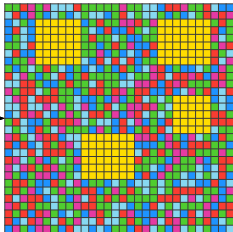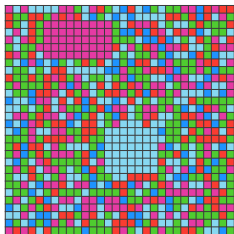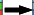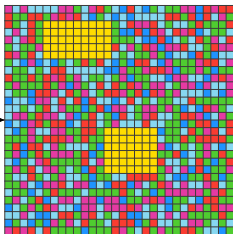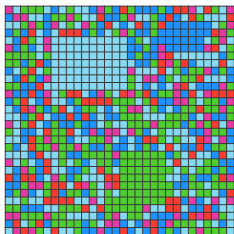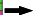

?

Supplement: supplementary_material [file 25094a63_problem.pdf › CompressARC/results_for_the_blog_post/plots_evaluation/25094a63_problem.pdf]

sample

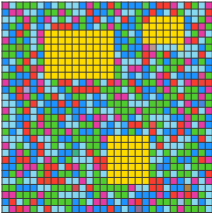

sample average

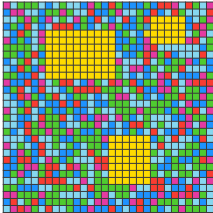

guess 1

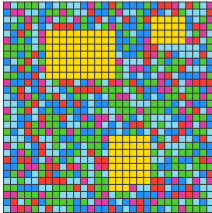

guess 2

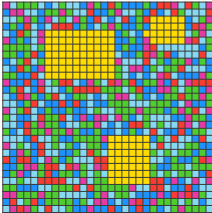

Supplement: supplementary_material [file 25094a63_solutions.pdf › CompressARC/results_for_the_blog_post/plots_evaluation/25094a63_solutions.pdf]

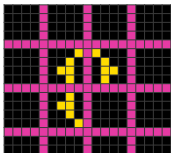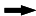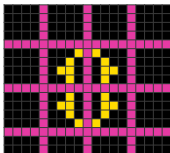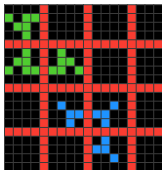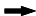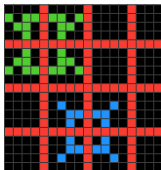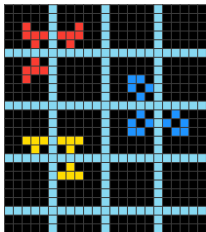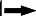

?

Supplement: supplementary_material [file 2546ccf6_problem.pdf › CompressARC/results_for_the_blog_post/plots_evaluation/2546ccf6_problem.pdf]

sample

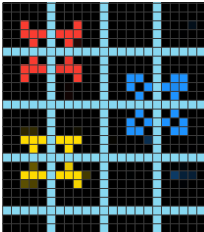

sample average

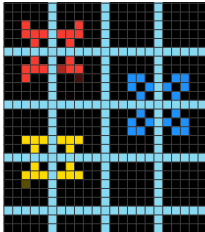

guess 1

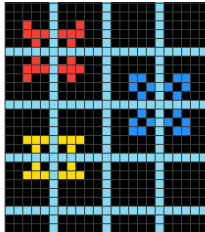

guess 2

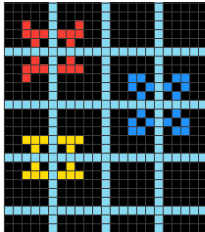

Supplement: supplementary_material [file 2546ccf6_solutions.pdf › CompressARC/results_for_the_blog_post/plots_evaluation/2546ccf6_solutions.pdf]

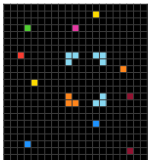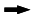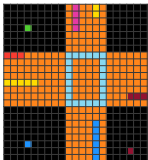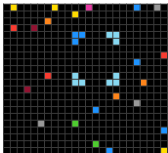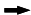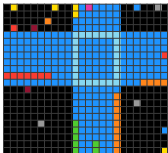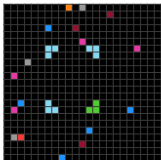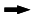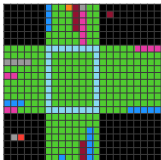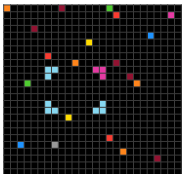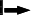

?

Supplement: supplementary_material [file 256b0a75_problem.pdf › CompressARC/results_for_the_blog_post/plots_evaluation/256b0a75_problem.pdf]

sample

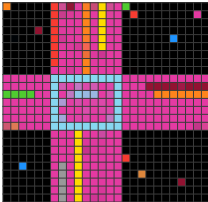

sample average

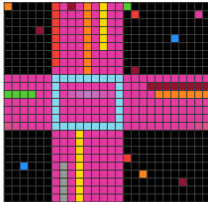

guess 1

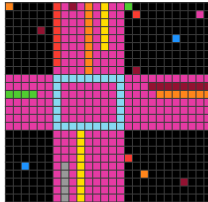

guess 2

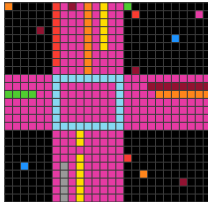

Supplement: supplementary_material [file 256b0a75_solutions.pdf › CompressARC/results_for_the_blog_post/plots_evaluation/256b0a75_solutions.pdf]

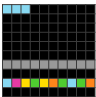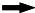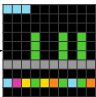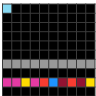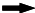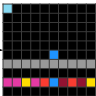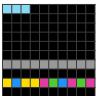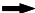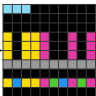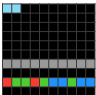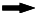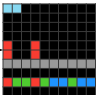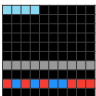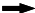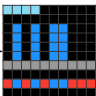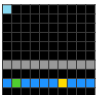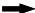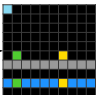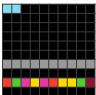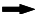

?

Supplement: supplementary_material [file 2685904e_problem.pdf › CompressARC/results_for_the_blog_post/plots_evaluation/2685904e_problem.pdf]

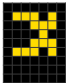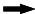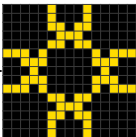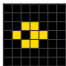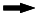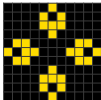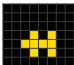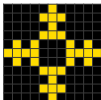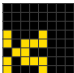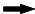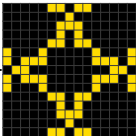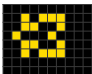

?

Supplement: supplementary_material [file 2697da3f_problem.pdf › CompressARC/results_for_the_blog_post/plots_evaluation/2697da3f_problem.pdf]

sample

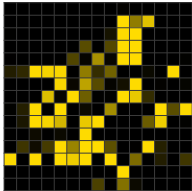

sample average

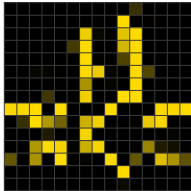

guess 1

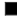

guess 2

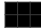

Supplement: supplementary_material [file 2697da3f_solutions.pdf › CompressARC/results_for_the_blog_post/plots_evaluation/2697da3f_solutions.pdf]

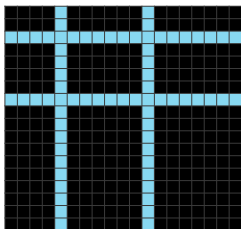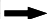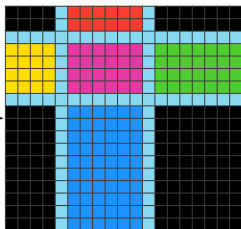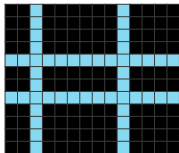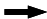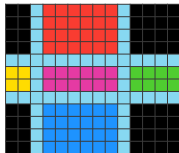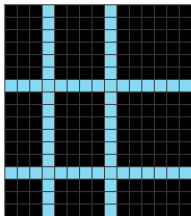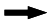

?

Supplement: supplementary_material [file 272f95fa_problem.pdf › CompressARC/results_for_the_blog_post/plots_evaluation/272f95fa_problem.pdf]

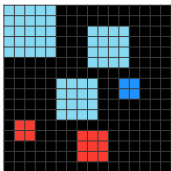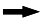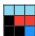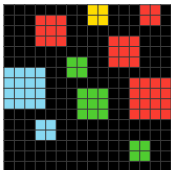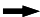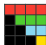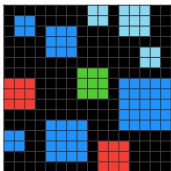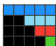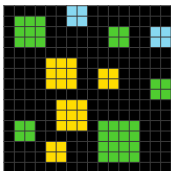

?

Supplement: supplementary_material [file 2753e76c_problem.pdf › CompressARC/results_for_the_blog_post/plots_evaluation/2753e76c_problem.pdf]

sample

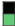

sample average

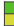

guess 1

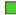

guess 2

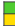

Supplement: supplementary_material [file 2753e76c_solutions.pdf › CompressARC/results_for_the_blog_post/plots_evaluation/2753e76c_solutions.pdf]

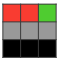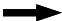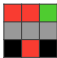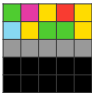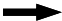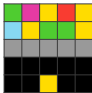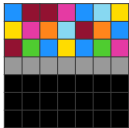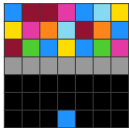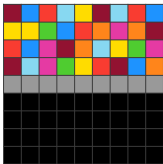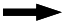

?

Supplement: supplementary_material [file 27a77e38_problem.pdf › CompressARC/results_for_the_blog_post/plots_evaluation/27a77e38_problem.pdf]

sample

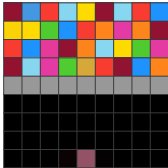

sample average

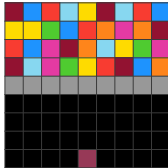

guess 1

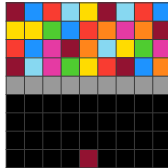

guess 2

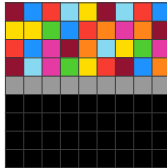

Supplement: supplementary_material [file 27a77e38_solutions.pdf › CompressARC/results_for_the_blog_post/plots_evaluation/27a77e38_solutions.pdf]

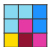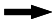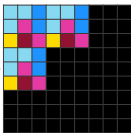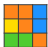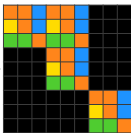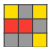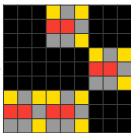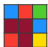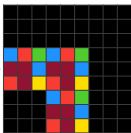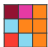

?

Supplement: supplementary_material [file 27f8ce4f_problem.pdf › CompressARC/results_for_the_blog_post/plots_evaluation/27f8ce4f_problem.pdf]

sample

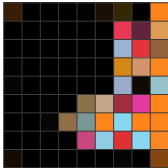

sample average

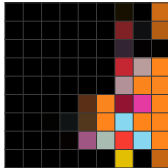

guess 1

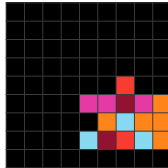

guess 2

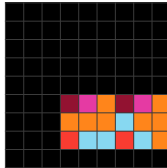

Supplement: supplementary_material [file 27f8ce4f_solutions.pdf › CompressARC/results_for_the_blog_post/plots_evaluation/27f8ce4f_solutions.pdf]

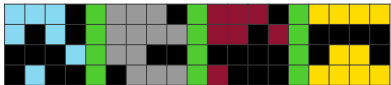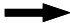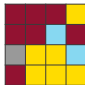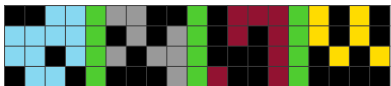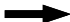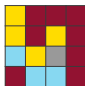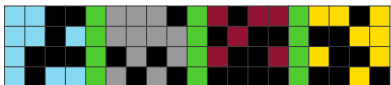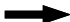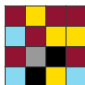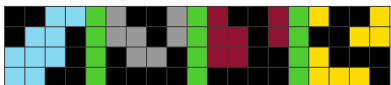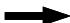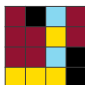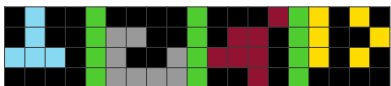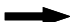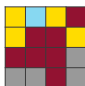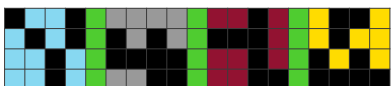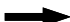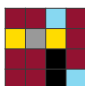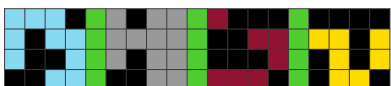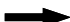

?

Supplement: supplementary_material [file 281123b4_problem.pdf › CompressARC/results_for_the_blog_post/plots_evaluation/281123b4_problem.pdf]

sample

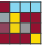

sample average

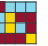

guess 1

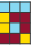

guess 2

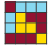

Supplement: supplementary_material [file 281123b4_solutions.pdf › CompressARC/results_for_the_blog_post/plots_evaluation/281123b4_solutions.pdf]

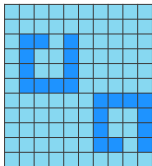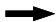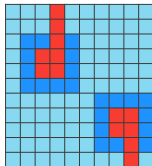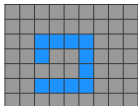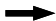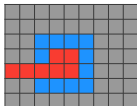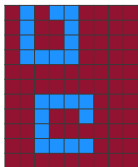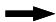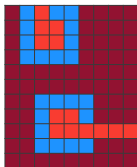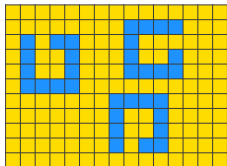

?

Supplement: supplementary_material [file 292dd178_problem.pdf › CompressARC/results_for_the_blog_post/plots_evaluation/292dd178_problem.pdf]

sample

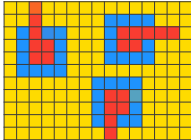

sample average

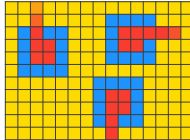

guess 1

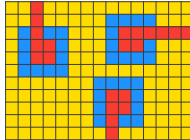

guess 2

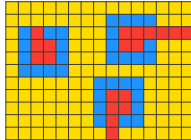

Supplement: supplementary_material [file 292dd178_solutions.pdf › CompressARC/results_for_the_blog_post/plots_evaluation/292dd178_solutions.pdf]

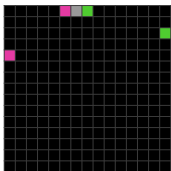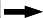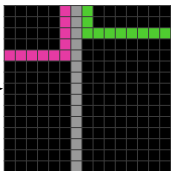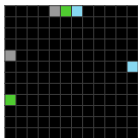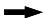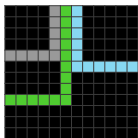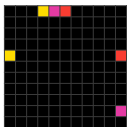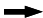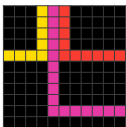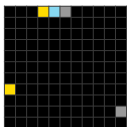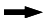

?

Supplement: supplementary_material [file 29700607_problem.pdf › CompressARC/results_for_the_blog_post/plots_evaluation/29700607_problem.pdf]

sample

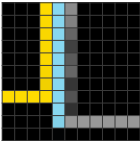

sample average

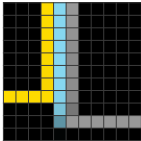

guess 1

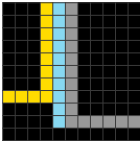

guess 2

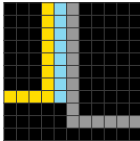

Supplement: supplementary_material [file 29700607_solutions.pdf › CompressARC/results_for_the_blog_post/plots_evaluation/29700607_solutions.pdf]

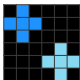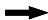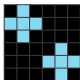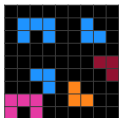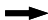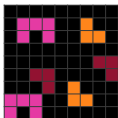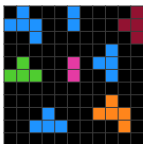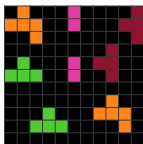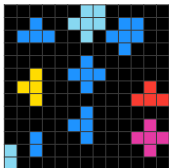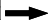

?

Supplement: supplementary_material [file 2a5f8217_problem.pdf › CompressARC/results_for_the_blog_post/plots_evaluation/2a5f8217_problem.pdf]

sample

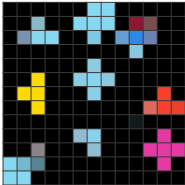

sample average

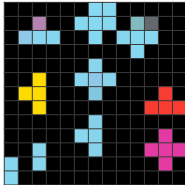

guess 1

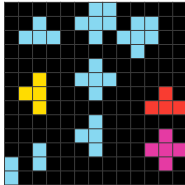

guess 2

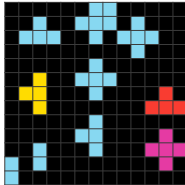

Supplement: supplementary_material [file 2a5f8217_solutions.pdf › CompressARC/results_for_the_blog_post/plots_evaluation/2a5f8217_solutions.pdf]

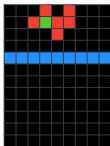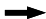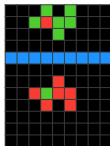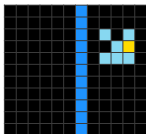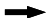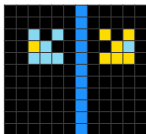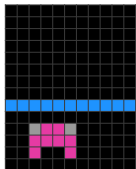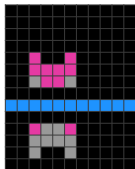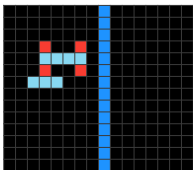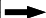

?

Supplement: supplementary_material [file 2b01abd0_problem.pdf › CompressARC/results_for_the_blog_post/plots_evaluation/2b01abd0_problem.pdf]

sample

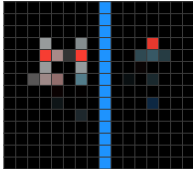

sample average

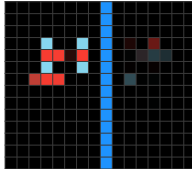

guess 1

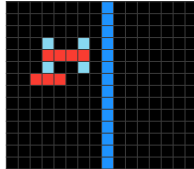

guess 2

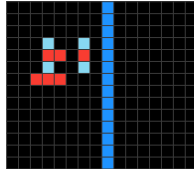

Supplement: supplementary_material [file 2b01abd0_solutions.pdf › CompressARC/results_for_the_blog_post/plots_evaluation/2b01abd0_solutions.pdf]

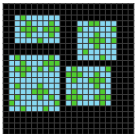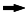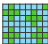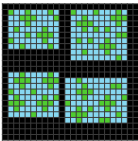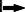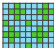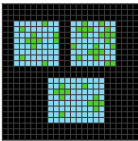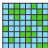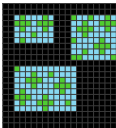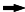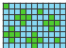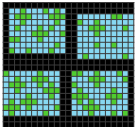

?

Supplement: supplementary_material [file 2c0b0aff_problem.pdf › CompressARC/results_for_the_blog_post/plots_evaluation/2c0b0aff_problem.pdf]

sample

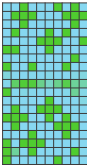

sample average

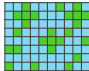

guess 1

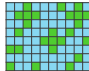

guess 2

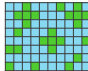

Supplement: supplementary_material [file 2c0b0aff_solutions.pdf › CompressARC/results_for_the_blog_post/plots_evaluation/2c0b0aff_solutions.pdf]

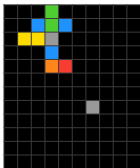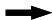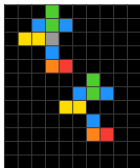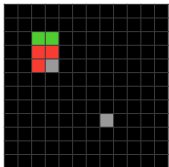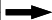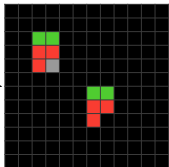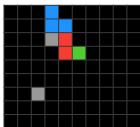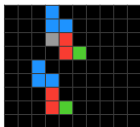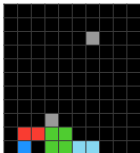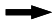

?

Supplement: supplementary_material [file 2c737e39_problem.pdf › CompressARC/results_for_the_blog_post/plots_evaluation/2c737e39_problem.pdf]

sample

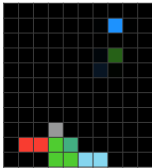

sample average

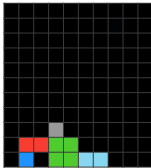

guess 1

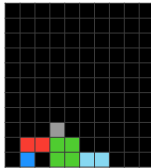

guess 2

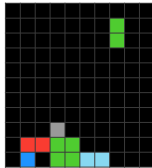

Supplement: supplementary_material [file 2c737e39_solutions.pdf › CompressARC/results_for_the_blog_post/plots_evaluation/2c737e39_solutions.pdf]

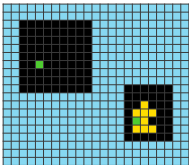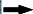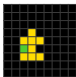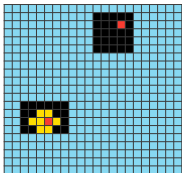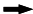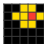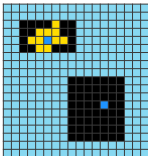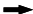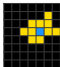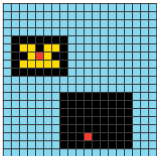

?

Supplement: supplementary_material [file 2f0c5170_problem.pdf › CompressARC/results_for_the_blog_post/plots_evaluation/2f0c5170_problem.pdf]

sample

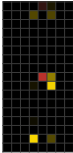

sample average

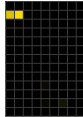

guess 1

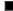

guess 2

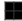

Supplement: supplementary_material [file 2f0c5170_solutions.pdf › CompressARC/results_for_the_blog_post/plots_evaluation/2f0c5170_solutions.pdf]

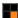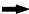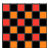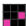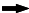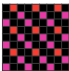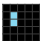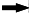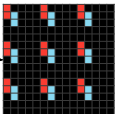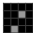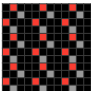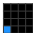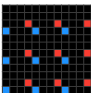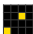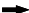

?

Supplement: supplementary_material [file 310f3251_problem.pdf › CompressARC/results_for_the_blog_post/plots_evaluation/310f3251_problem.pdf]

sample

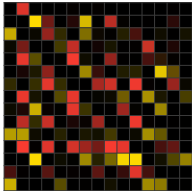

sample average

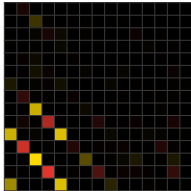

guess 1

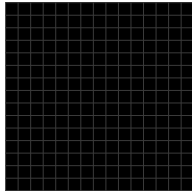

guess 2

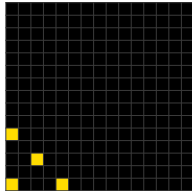

Supplement: supplementary_material [file 310f3251_solutions.pdf › CompressARC/results_for_the_blog_post/plots_evaluation/310f3251_solutions.pdf]

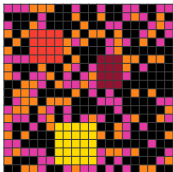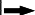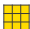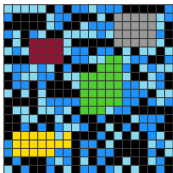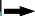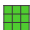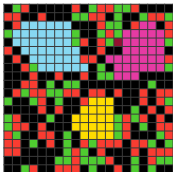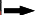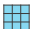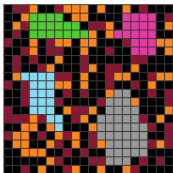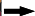

?

Supplement: supplementary_material [file 3194b014_problem.pdf › CompressARC/results_for_the_blog_post/plots_evaluation/3194b014_problem.pdf]

sample

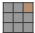

sample average

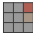

guess 1

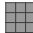

guess 2

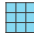

Supplement: supplementary_material [file 3194b014_solutions.pdf › CompressARC/results_for_the_blog_post/plots_evaluation/3194b014_solutions.pdf]

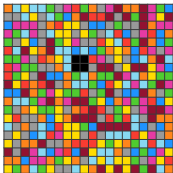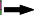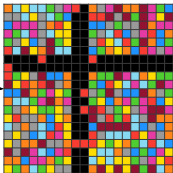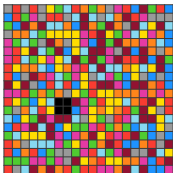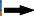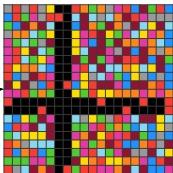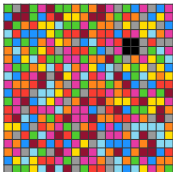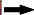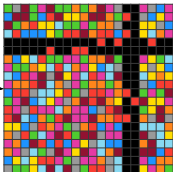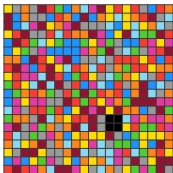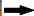

?

Supplement: supplementary_material [file 319f2597_problem.pdf › CompressARC/results_for_the_blog_post/plots_evaluation/319f2597_problem.pdf]

sample

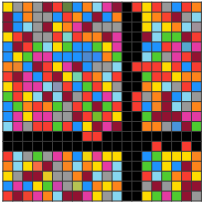

sample average

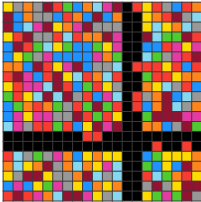

guess 1

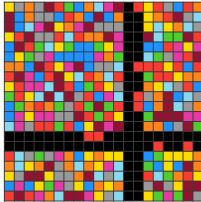

guess 2

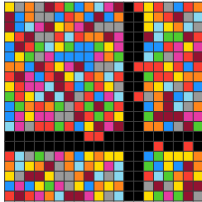

Supplement: supplementary_material [file 319f2597_solutions.pdf › CompressARC/results_for_the_blog_post/plots_evaluation/319f2597_solutions.pdf]

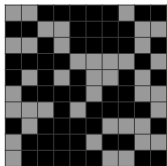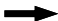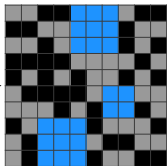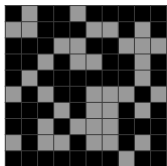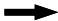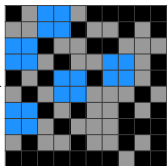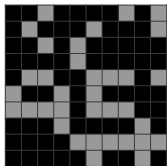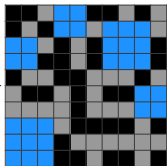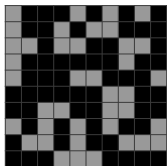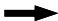

?

Supplement: supplementary_material [file 31adaf00_problem.pdf › CompressARC/results_for_the_blog_post/plots_evaluation/31adaf00_problem.pdf]

sample

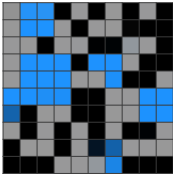

sample average

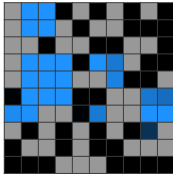

guess 1

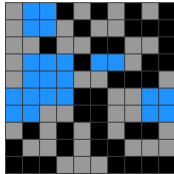

guess 2

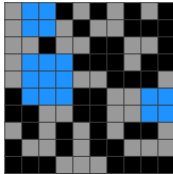

Supplement: supplementary_material [file 31adaf00_solutions.pdf › CompressARC/results_for_the_blog_post/plots_evaluation/31adaf00_solutions.pdf]

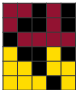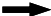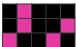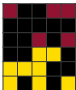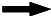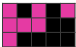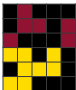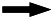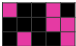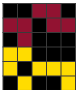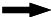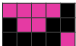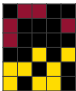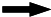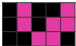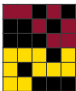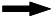

?

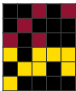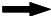

?

Supplement: supplementary_material [file 31d5ba1a_problem.pdf › CompressARC/results_for_the_blog_post/plots_evaluation/31d5ba1a_problem.pdf]

sample

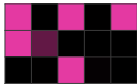

sample average

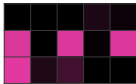

guess 1

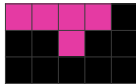

guess 2

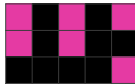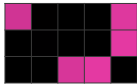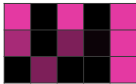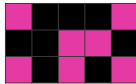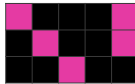

Supplement: supplementary_material [file 31d5ba1a_solutions.pdf › CompressARC/results_for_the_blog_post/plots_evaluation/31d5ba1a_solutions.pdf]

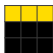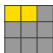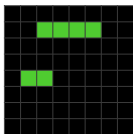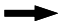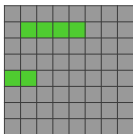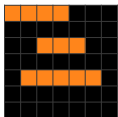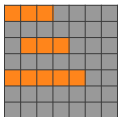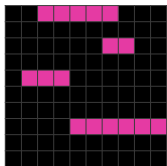

?

Supplement: supplementary_material [file 32e9702f_problem.pdf › CompressARC/results_for_the_blog_post/plots_evaluation/32e9702f_problem.pdf]

sample

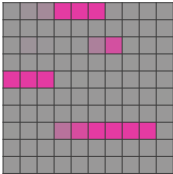

sample average

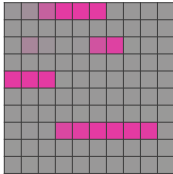

guess 1

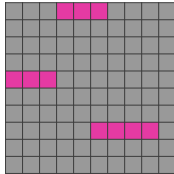

guess 2

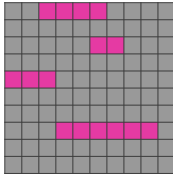

Supplement: supplementary_material [file 32e9702f_solutions.pdf › CompressARC/results_for_the_blog_post/plots_evaluation/32e9702f_solutions.pdf]

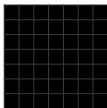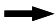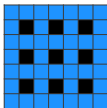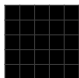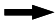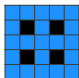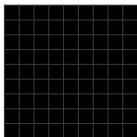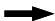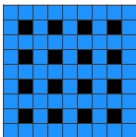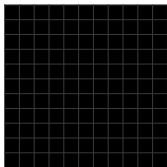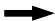

?

Supplement: supplementary_material [file 332efdb3_problem.pdf › CompressARC/results_for_the_blog_post/plots_evaluation/332efdb3_problem.pdf]

sample

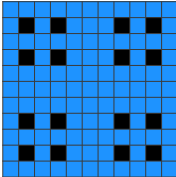

sample average

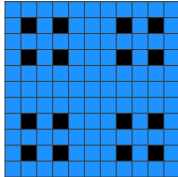

guess 1

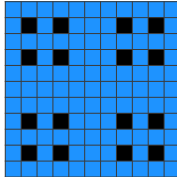

guess 2

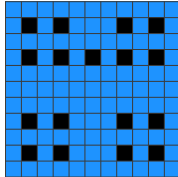

Supplement: supplementary_material [file 332efdb3_solutions.pdf › CompressARC/results_for_the_blog_post/plots_evaluation/332efdb3_solutions.pdf]

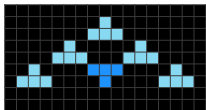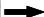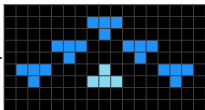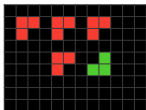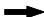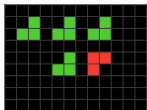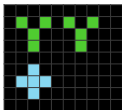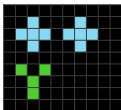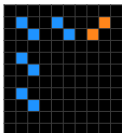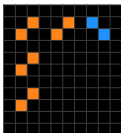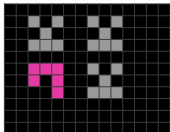

?

Supplement: supplementary_material [file 3391f8c0_problem.pdf › CompressARC/results_for_the_blog_post/plots_evaluation/3391f8c0_problem.pdf]

sample

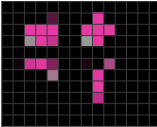

sample average

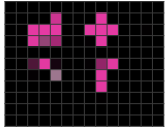

guess 1

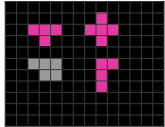

guess 2

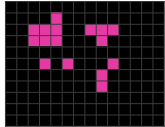

Supplement: supplementary_material [file 3391f8c0_solutions.pdf › CompressARC/results_for_the_blog_post/plots_evaluation/3391f8c0_solutions.pdf]

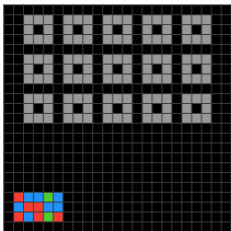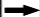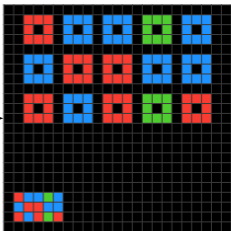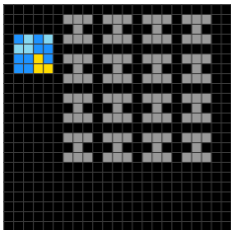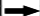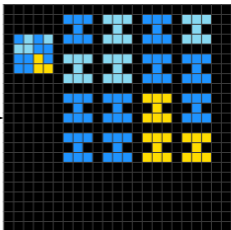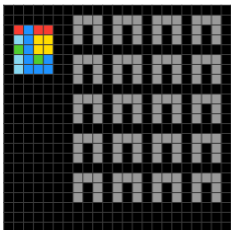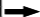

?

Supplement: supplementary_material [file 33b52de3_problem.pdf › CompressARC/results_for_the_blog_post/plots_evaluation/33b52de3_problem.pdf]

sample

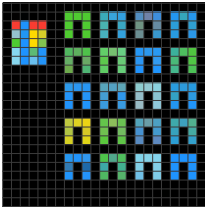

sample average

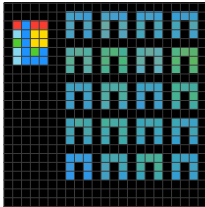

guess 1

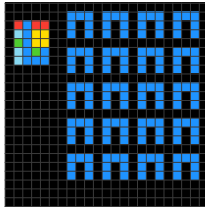

guess 2

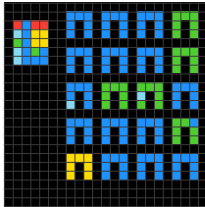

Supplement: supplementary_material [file 33b52de3_solutions.pdf › CompressARC/results_for_the_blog_post/plots_evaluation/33b52de3_solutions.pdf]

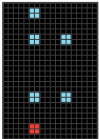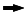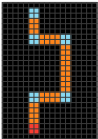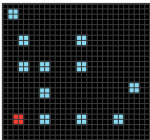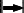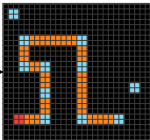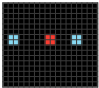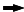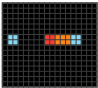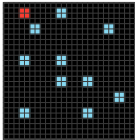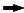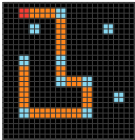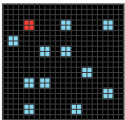

?

Supplement: supplementary_material [file 3490cc26_problem.pdf › CompressARC/results_for_the_blog_post/plots_evaluation/3490cc26_problem.pdf]

sample

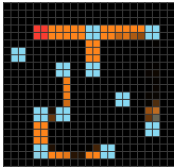

sample average

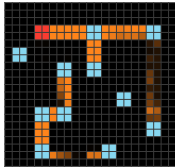

guess 1

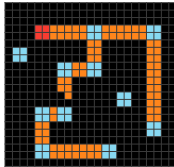

guess 2

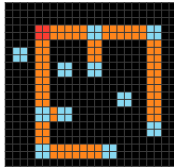

Supplement: supplementary_material [file 3490cc26_solutions.pdf › CompressARC/results_for_the_blog_post/plots_evaluation/3490cc26_solutions.pdf]

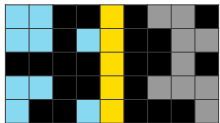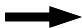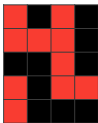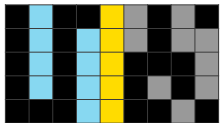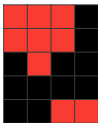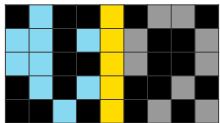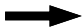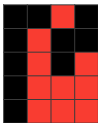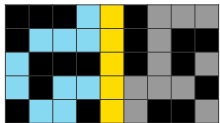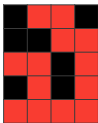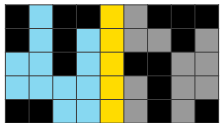

?

Supplement: supplementary_material [file 34b99a2b_problem.pdf › CompressARC/results_for_the_blog_post/plots_evaluation/34b99a2b_problem.pdf]

sample

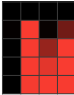

sample average

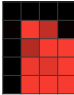

guess 1

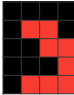

guess 2

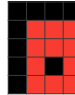

Supplement: supplementary_material [file 34b99a2b_solutions.pdf › CompressARC/results_for_the_blog_post/plots_evaluation/34b99a2b_solutions.pdf]

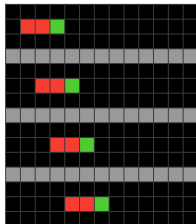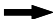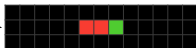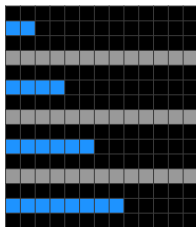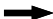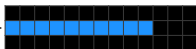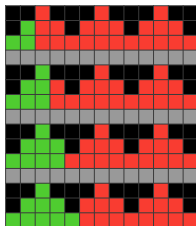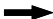

?

Supplement: supplementary_material [file 351d6448_problem.pdf › CompressARC/results_for_the_blog_post/plots_evaluation/351d6448_problem.pdf]

sample

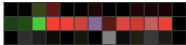

sample average

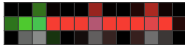

guess 1

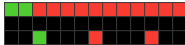

guess 2

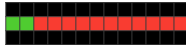

Supplement: supplementary_material [file 351d6448_solutions.pdf › CompressARC/results_for_the_blog_post/plots_evaluation/351d6448_solutions.pdf]

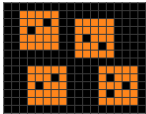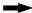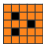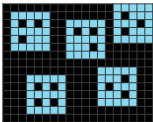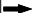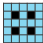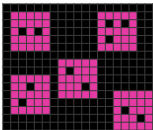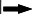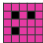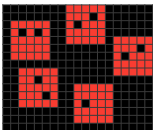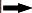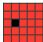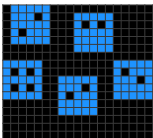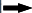

?

Supplement: supplementary_material [file 358ba94e_problem.pdf › CompressARC/results_for_the_blog_post/plots_evaluation/358ba94e_problem.pdf]

sample

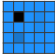

sample average

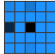

guess 1

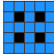

guess 2

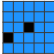

Supplement: supplementary_material [file 358ba94e_solutions.pdf › CompressARC/results_for_the_blog_post/plots_evaluation/358ba94e_solutions.pdf]

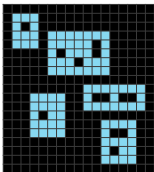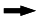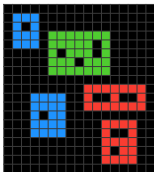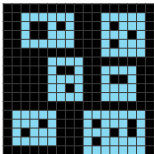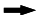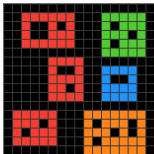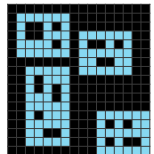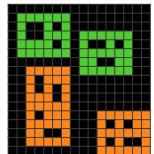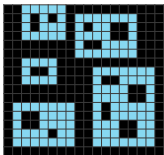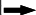

?

Supplement: supplementary_material [file 37d3e8b2_problem.pdf › CompressARC/results_for_the_blog_post/plots_evaluation/37d3e8b2_problem.pdf]

sample

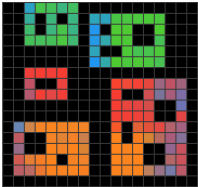

sample average

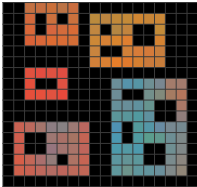

guess 1

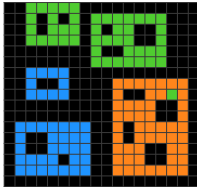

guess 2

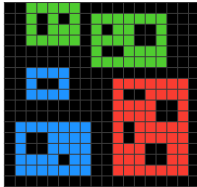

Supplement: supplementary_material [file 37d3e8b2_solutions.pdf › CompressARC/results_for_the_blog_post/plots_evaluation/37d3e8b2_solutions.pdf]

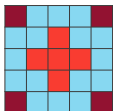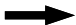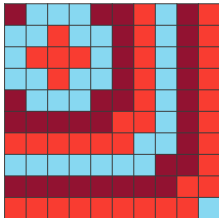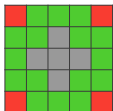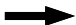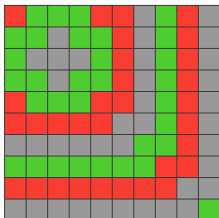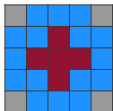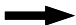

?

Supplement: supplementary_material [file 3979b1a8_problem.pdf › CompressARC/results_for_the_blog_post/plots_evaluation/3979b1a8_problem.pdf]
