# Supplementary material (part 4 of 17)
Source: ML conference proceedings conference paper supplement (https://openreview.net/forum?id=jLC662Yo5h)

sample

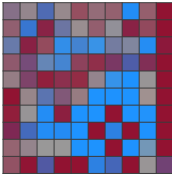

sample average

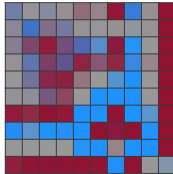

guess 1

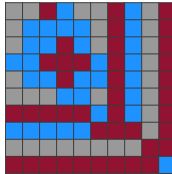

guess 2

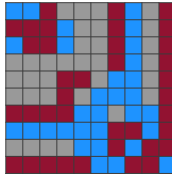

Supplement: supplementary_material [file 3979b1a8_solutions.pdf › CompressARC/results_for_the_blog_post/plots_evaluation/3979b1a8_solutions.pdf]

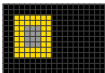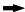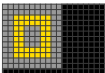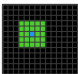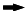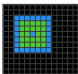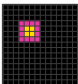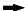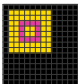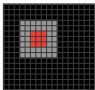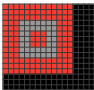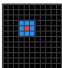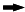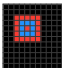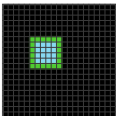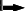

?

Supplement: supplementary_material [file 3a301edc_problem.pdf › CompressARC/results_for_the_blog_post/plots_evaluation/3a301edc_problem.pdf]

sample

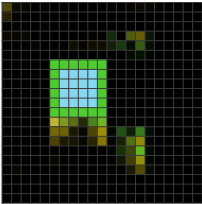

sample average

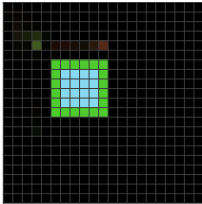

guess 1

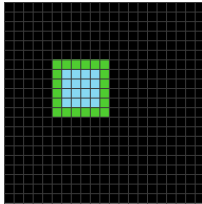

guess 2

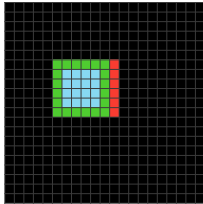

Supplement: supplementary_material [file 3a301edc_solutions.pdf › CompressARC/results_for_the_blog_post/plots_evaluation/3a301edc_solutions.pdf]

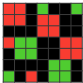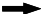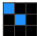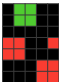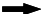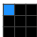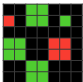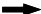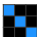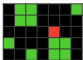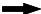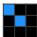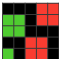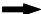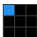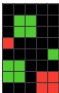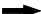

?

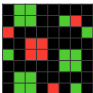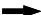

?

Supplement: supplementary_material [file 3b4c2228_problem.pdf › CompressARC/results_for_the_blog_post/plots_evaluation/3b4c2228_problem.pdf]

sample

sample average

guess 1

guess 2

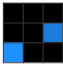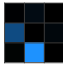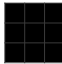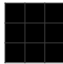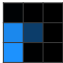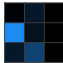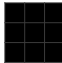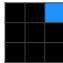

Supplement: supplementary_material [file 3b4c2228_solutions.pdf › CompressARC/results_for_the_blog_post/plots_evaluation/3b4c2228_solutions.pdf]

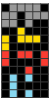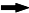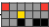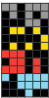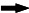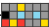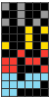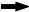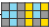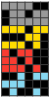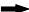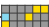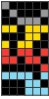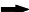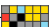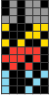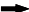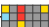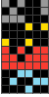

Supplement: supplementary_material [file 3d31c5b3_problem.pdf › CompressARC/results_for_the_blog_post/plots_evaluation/3d31c5b3_problem.pdf]

sample

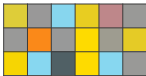

sample average

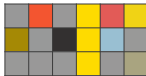

guess 1

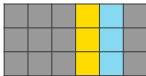

guess 2

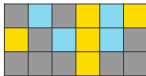

Supplement: supplementary_material [file 3d31c5b3_solutions.pdf › CompressARC/results_for_the_blog_post/plots_evaluation/3d31c5b3_solutions.pdf]

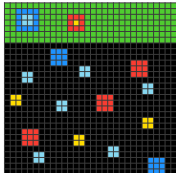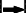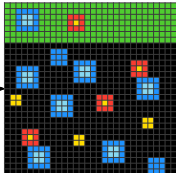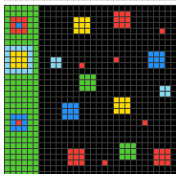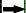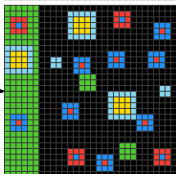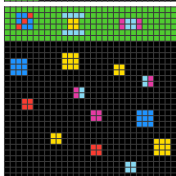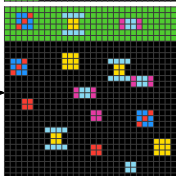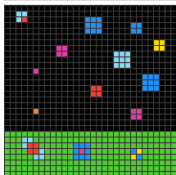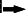

?

Supplement: supplementary_material [file 3ed85e70_problem.pdf › CompressARC/results_for_the_blog_post/plots_evaluation/3ed85e70_problem.pdf]

sample

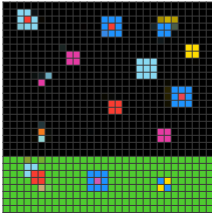

sample average

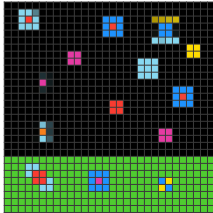

guess 1

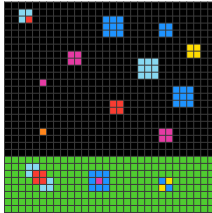

guess 2

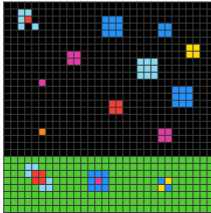

Supplement: supplementary_material [file 3ed85e70_solutions.pdf › CompressARC/results_for_the_blog_post/plots_evaluation/3ed85e70_solutions.pdf]

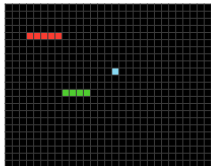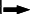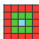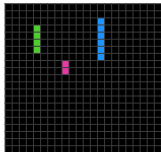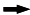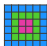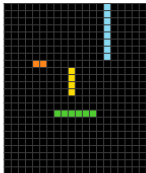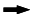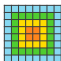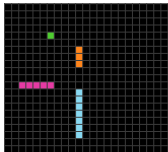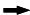

?

Supplement: supplementary_material [file 3ee1011a_problem.pdf › CompressARC/results_for_the_blog_post/plots_evaluation/3ee1011a_problem.pdf]

sample

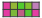

sample average

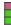

guess 1

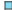

guess 2

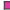

Supplement: supplementary_material [file 3ee1011a_solutions.pdf › CompressARC/results_for_the_blog_post/plots_evaluation/3ee1011a_solutions.pdf]

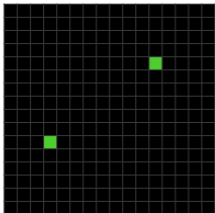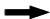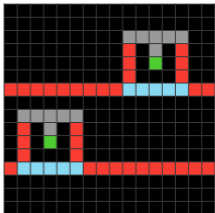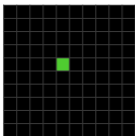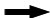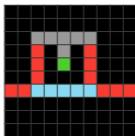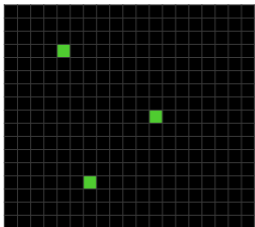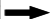

?

Supplement: supplementary_material [file 3f23242b_problem.pdf › CompressARC/results_for_the_blog_post/plots_evaluation/3f23242b_problem.pdf]

sample

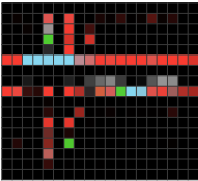

sample average

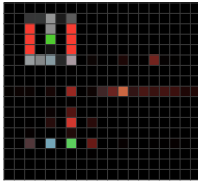

guess 1

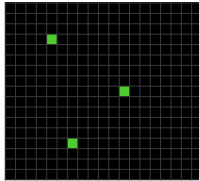

guess 2

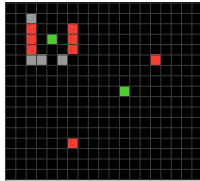

Supplement: supplementary_material [file 3f23242b_solutions.pdf › CompressARC/results_for_the_blog_post/plots_evaluation/3f23242b_solutions.pdf]

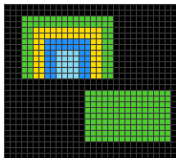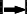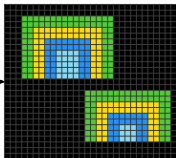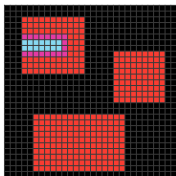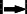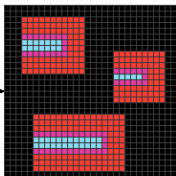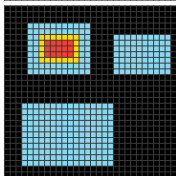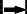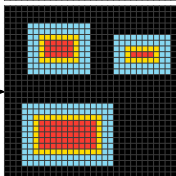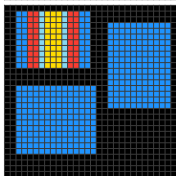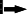

?

Supplement: supplementary_material [file 40f6cd08_problem.pdf › CompressARC/results_for_the_blog_post/plots_evaluation/40f6cd08_problem.pdf]

sample

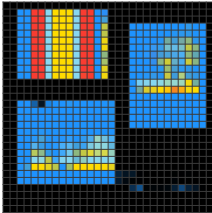

sample average

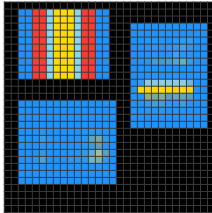

guess 1

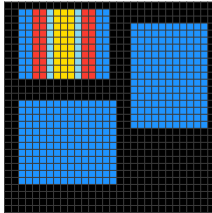

guess 2

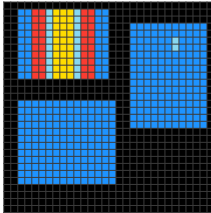

Supplement: supplementary_material [file 40f6cd08_solutions.pdf › CompressARC/results_for_the_blog_post/plots_evaluation/40f6cd08_solutions.pdf]

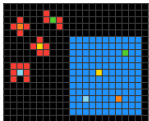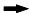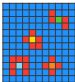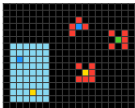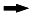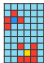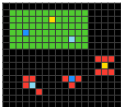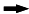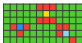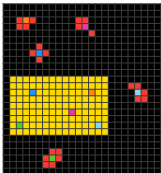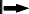

?

Supplement: supplementary_material [file 414297c0_problem.pdf › CompressARC/results_for_the_blog_post/plots_evaluation/414297c0_problem.pdf]

sample

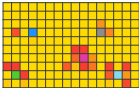

sample average

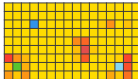

guess 1

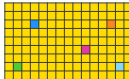

guess 2

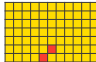

Supplement: supplementary_material [file 414297c0_solutions.pdf › CompressARC/results_for_the_blog_post/plots_evaluation/414297c0_solutions.pdf]

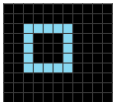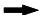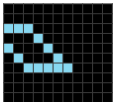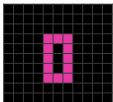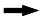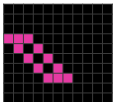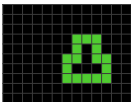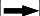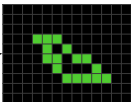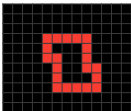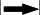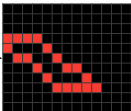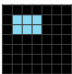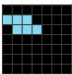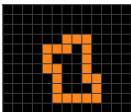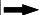

?

Supplement: supplementary_material [file 423a55dc_problem.pdf › CompressARC/results_for_the_blog_post/plots_evaluation/423a55dc_problem.pdf]

sample

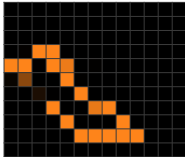

sample average

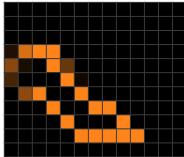

guess 1

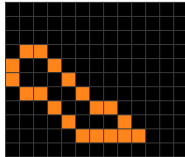

guess 2

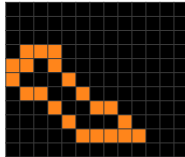

Supplement: supplementary_material [file 423a55dc_solutions.pdf › CompressARC/results_for_the_blog_post/plots_evaluation/423a55dc_solutions.pdf]

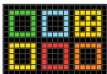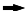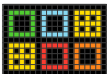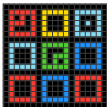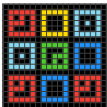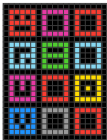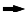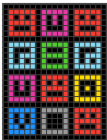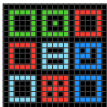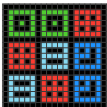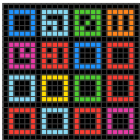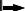

?

Supplement: supplementary_material [file 42918530_problem.pdf › CompressARC/results_for_the_blog_post/plots_evaluation/42918530_problem.pdf]

sample

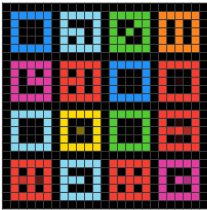

sample average

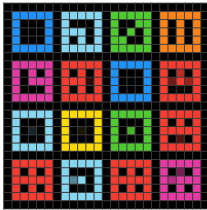

guess 1

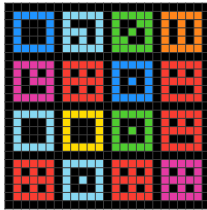

guess 2

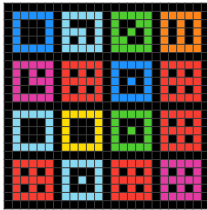

Supplement: supplementary_material [file 42918530_solutions.pdf › CompressARC/results_for_the_blog_post/plots_evaluation/42918530_solutions.pdf]

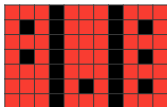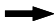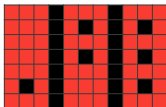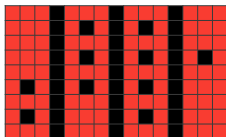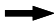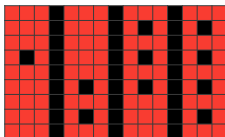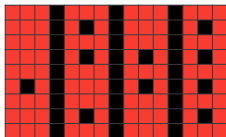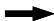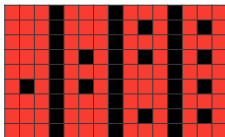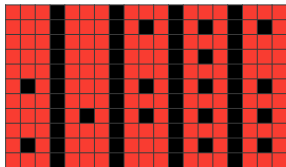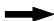

?

Supplement: supplementary_material [file 42a15761_problem.pdf › CompressARC/results_for_the_blog_post/plots_evaluation/42a15761_problem.pdf]

sample

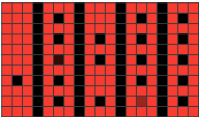

sample average

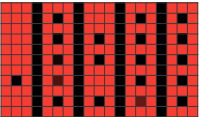

guess 1

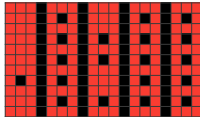

guess 2

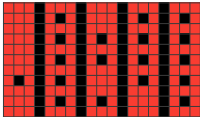

Supplement: supplementary_material [file 42a15761_solutions.pdf › CompressARC/results_for_the_blog_post/plots_evaluation/42a15761_solutions.pdf]

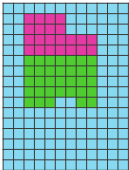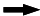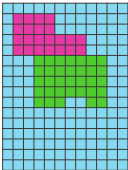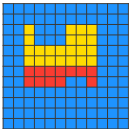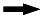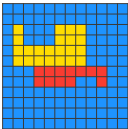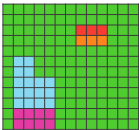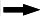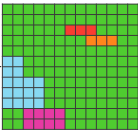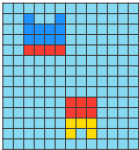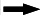

?

Supplement: supplementary_material [file 4364c1c4_problem.pdf › CompressARC/results_for_the_blog_post/plots_evaluation/4364c1c4_problem.pdf]

sample

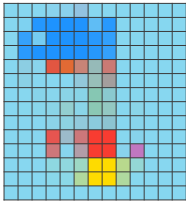

sample average

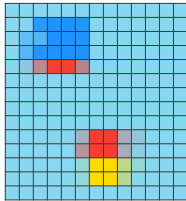

guess 1

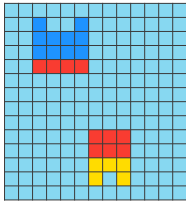

guess 2

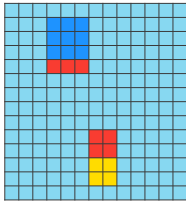

Supplement: supplementary_material [file 4364c1c4_solutions.pdf › CompressARC/results_for_the_blog_post/plots_evaluation/4364c1c4_solutions.pdf]

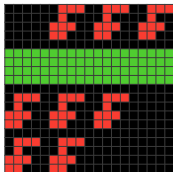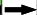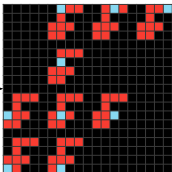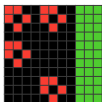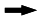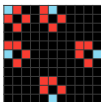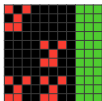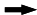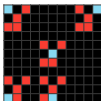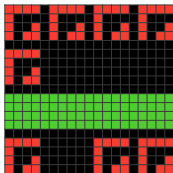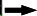

?

Supplement: supplementary_material [file 456873bc_problem.pdf › CompressARC/results_for_the_blog_post/plots_evaluation/456873bc_problem.pdf]

sample

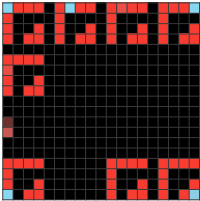

sample average

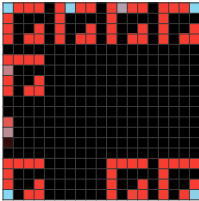

guess 1

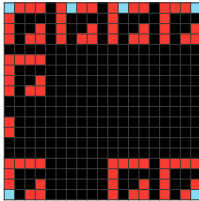

guess 2

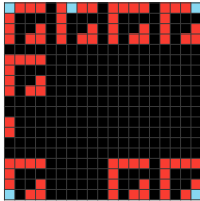

Supplement: supplementary_material [file 456873bc_solutions.pdf › CompressARC/results_for_the_blog_post/plots_evaluation/456873bc_solutions.pdf]

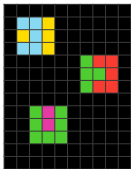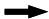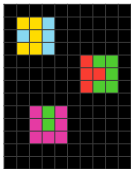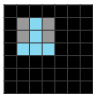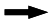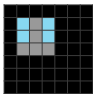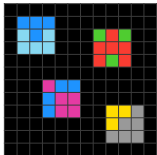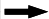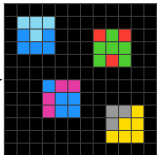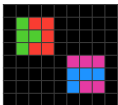

?

Supplement: supplementary_material [file 45737921_problem.pdf › CompressARC/results_for_the_blog_post/plots_evaluation/45737921_problem.pdf]

sample

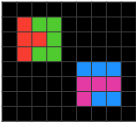

sample average

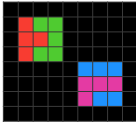

guess 1

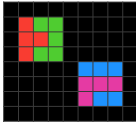

guess 2

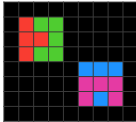

Supplement: supplementary_material [file 45737921_solutions.pdf › CompressARC/results_for_the_blog_post/plots_evaluation/45737921_solutions.pdf]

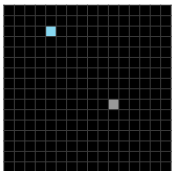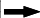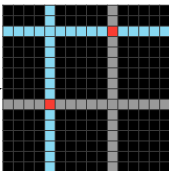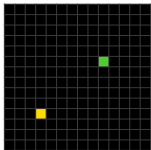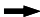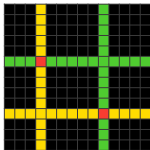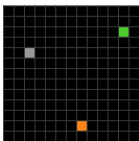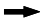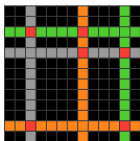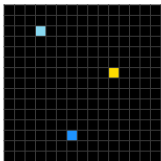

?

Supplement: supplementary_material [file 45bbe264_problem.pdf › CompressARC/results_for_the_blog_post/plots_evaluation/45bbe264_problem.pdf]

sample

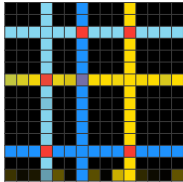

sample average

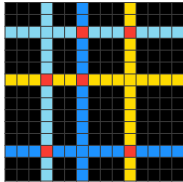

guess 1

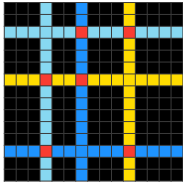

guess 2

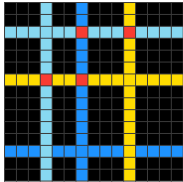

Supplement: supplementary_material [file 45bbe264_solutions.pdf › CompressARC/results_for_the_blog_post/plots_evaluation/45bbe264_solutions.pdf]

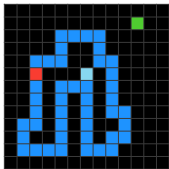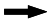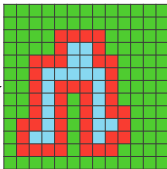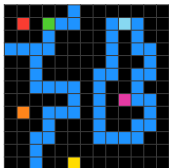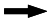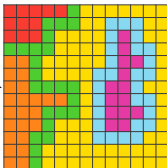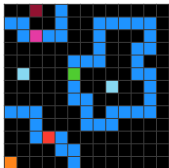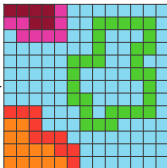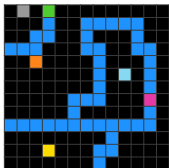

?

Supplement: supplementary_material [file 477d2879_problem.pdf › CompressARC/results_for_the_blog_post/plots_evaluation/477d2879_problem.pdf]

sample

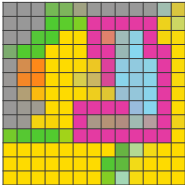

sample average

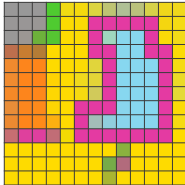

guess 1

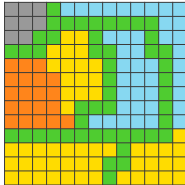

guess 2

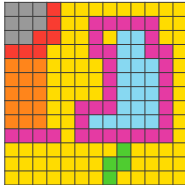

Supplement: supplementary_material [file 477d2879_solutions.pdf › CompressARC/results_for_the_blog_post/plots_evaluation/477d2879_solutions.pdf]

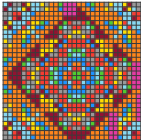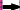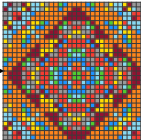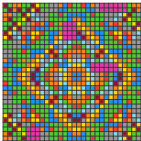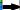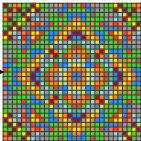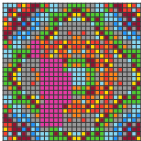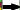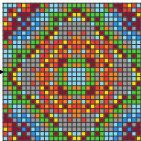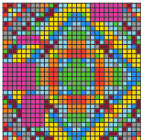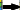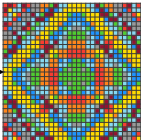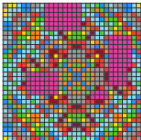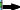

?

Supplement: supplementary_material [file 47996f11_problem.pdf › CompressARC/results_for_the_blog_post/plots_evaluation/47996f11_problem.pdf]

sample

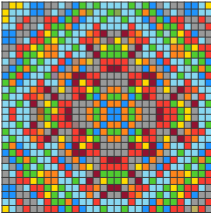

sample average

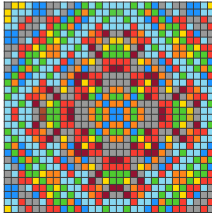

guess 1

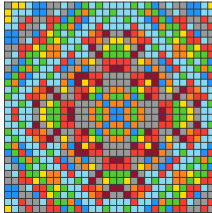

guess 2

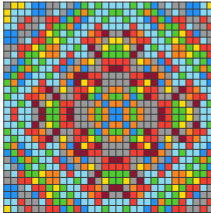

Supplement: supplementary_material [file 47996f11_solutions.pdf › CompressARC/results_for_the_blog_post/plots_evaluation/47996f11_solutions.pdf]

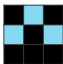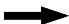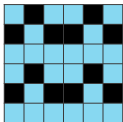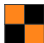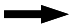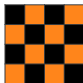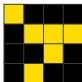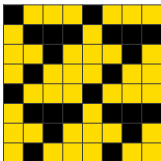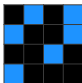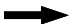

?

Supplement: supplementary_material [file 48131b3c_problem.pdf › CompressARC/results_for_the_blog_post/plots_evaluation/48131b3c_problem.pdf]

sample

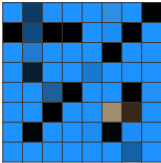

sample average

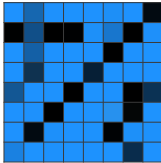

guess 1

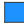

guess 2

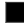

Supplement: supplementary_material [file 48131b3c_solutions.pdf › CompressARC/results_for_the_blog_post/plots_evaluation/48131b3c_solutions.pdf]

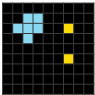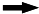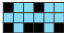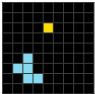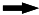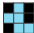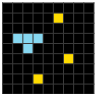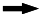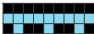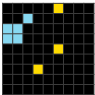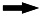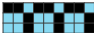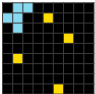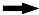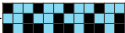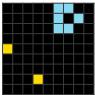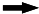

?

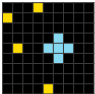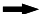

?

Supplement: supplementary_material [file 4852f2fa_problem.pdf › CompressARC/results_for_the_blog_post/plots_evaluation/4852f2fa_problem.pdf]

sample

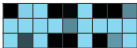

sample average

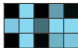

guess 1

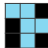

guess 2

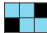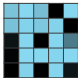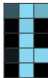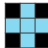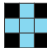

Supplement: supplementary_material [file 4852f2fa_solutions.pdf › CompressARC/results_for_the_blog_post/plots_evaluation/4852f2fa_solutions.pdf]

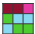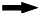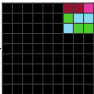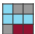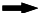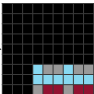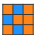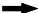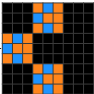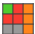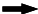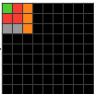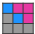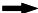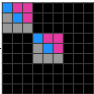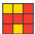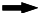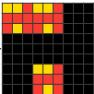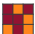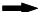

?

Supplement: supplementary_material [file 48f8583b_problem.pdf › CompressARC/results_for_the_blog_post/plots_evaluation/48f8583b_problem.pdf]

sample

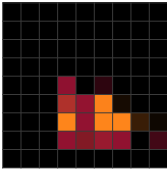

sample average

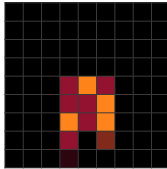

guess 1

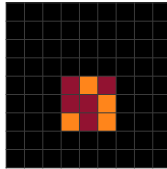

guess 2

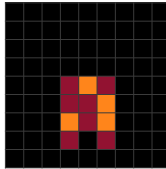

Supplement: supplementary_material [file 48f8583b_solutions.pdf › CompressARC/results_for_the_blog_post/plots_evaluation/48f8583b_solutions.pdf]

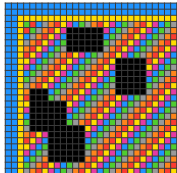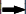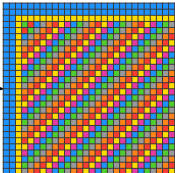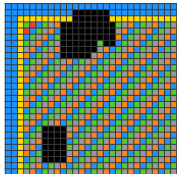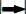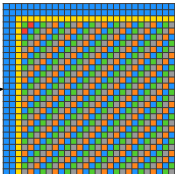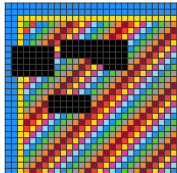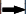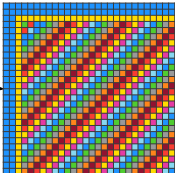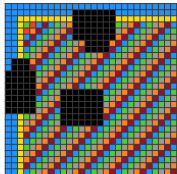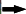

?

Supplement: supplementary_material [file 4aab4007_problem.pdf › CompressARC/results_for_the_blog_post/plots_evaluation/4aab4007_problem.pdf]

sample

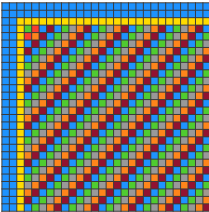

sample average

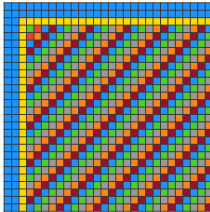

guess 1

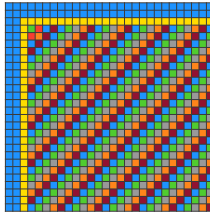

guess 2

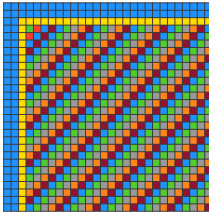

Supplement: supplementary_material [file 4aab4007_solutions.pdf › CompressARC/results_for_the_blog_post/plots_evaluation/4aab4007_solutions.pdf]

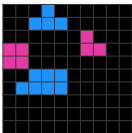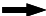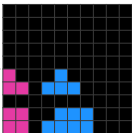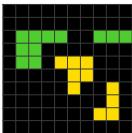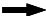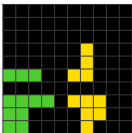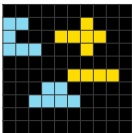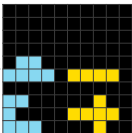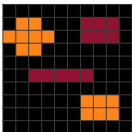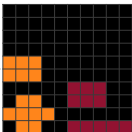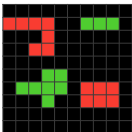

?

Supplement: supplementary_material [file 4acc7107_problem.pdf › CompressARC/results_for_the_blog_post/plots_evaluation/4acc7107_problem.pdf]

sample

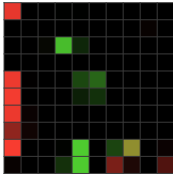

sample average

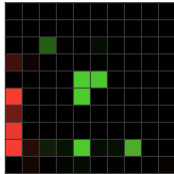

guess 1

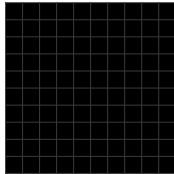

guess 2

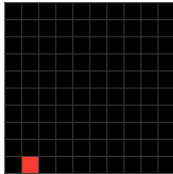

Supplement: supplementary_material [file 4acc7107_solutions.pdf › CompressARC/results_for_the_blog_post/plots_evaluation/4acc7107_solutions.pdf]

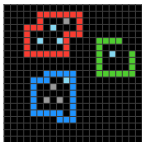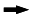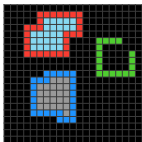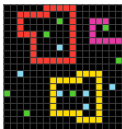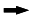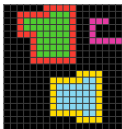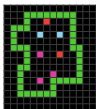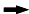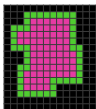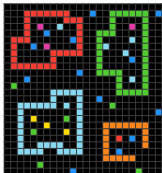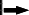

?

Supplement: supplementary_material [file 4b6b68e5_problem.pdf › CompressARC/results_for_the_blog_post/plots_evaluation/4b6b68e5_problem.pdf]

sample

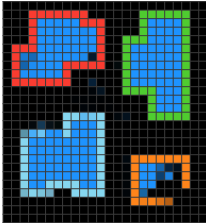

sample average

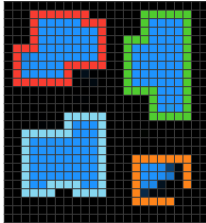

guess 1

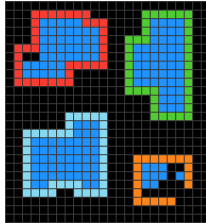

guess 2

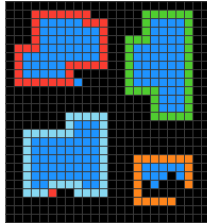

Supplement: supplementary_material [file 4b6b68e5_solutions.pdf › CompressARC/results_for_the_blog_post/plots_evaluation/4b6b68e5_solutions.pdf]

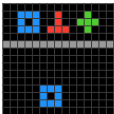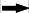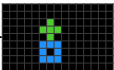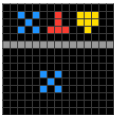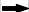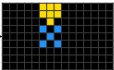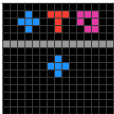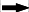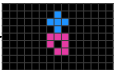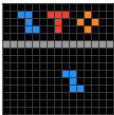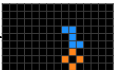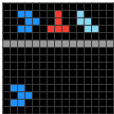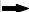

?

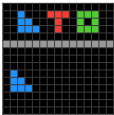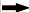

?

Supplement: supplementary_material [file 4c177718_problem.pdf › CompressARC/results_for_the_blog_post/plots_evaluation/4c177718_problem.pdf]

sample

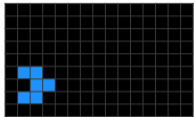

sample average

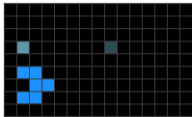

guess 1

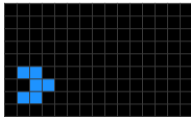

guess 2

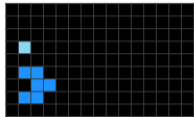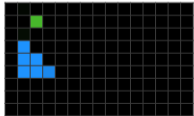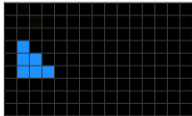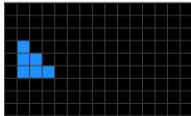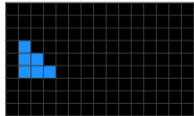

Supplement: supplementary_material [file 4c177718_solutions.pdf › CompressARC/results_for_the_blog_post/plots_evaluation/4c177718_solutions.pdf]

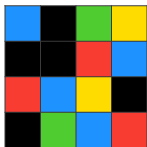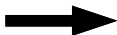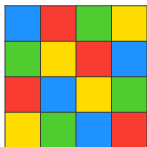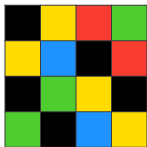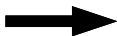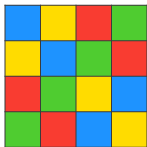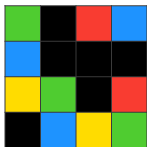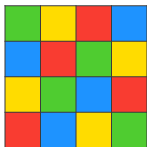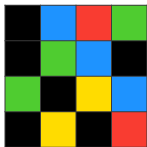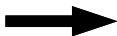

?

Supplement: supplementary_material [file 4cd1b7b2_problem.pdf › CompressARC/results_for_the_blog_post/plots_evaluation/4cd1b7b2_problem.pdf]

sample

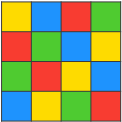

sample average

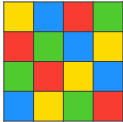

guess 1

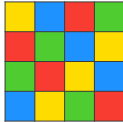

guess 2

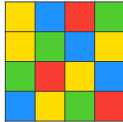

Supplement: supplementary_material [file 4cd1b7b2_solutions.pdf › CompressARC/results_for_the_blog_post/plots_evaluation/4cd1b7b2_solutions.pdf]

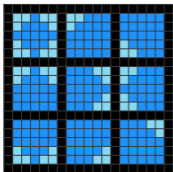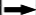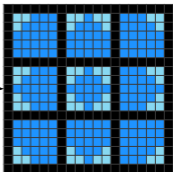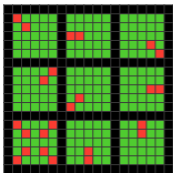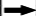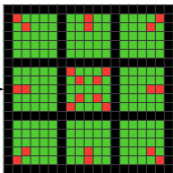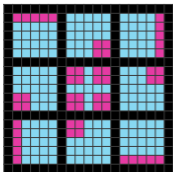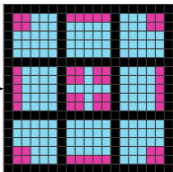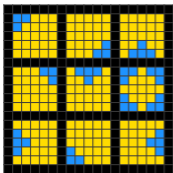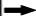

?

Supplement: supplementary_material [file 4e45f183_problem.pdf › CompressARC/results_for_the_blog_post/plots_evaluation/4e45f183_problem.pdf]

sample

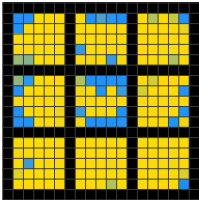

sample average

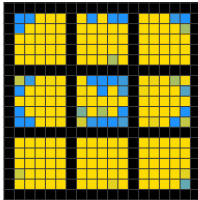

guess 1

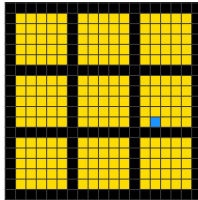

guess 2

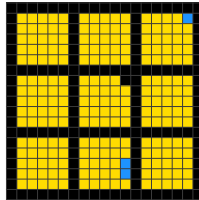

Supplement: supplementary_material [file 4e45f183_solutions.pdf › CompressARC/results_for_the_blog_post/plots_evaluation/4e45f183_solutions.pdf]

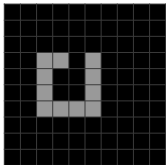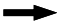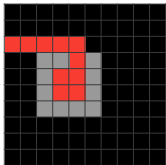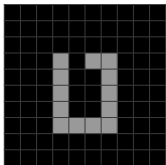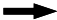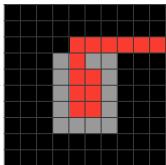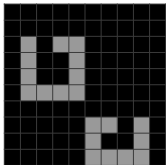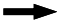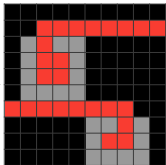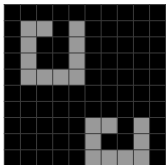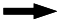

?

Supplement: supplementary_material [file 4e469f39_problem.pdf › CompressARC/results_for_the_blog_post/plots_evaluation/4e469f39_problem.pdf]

sample

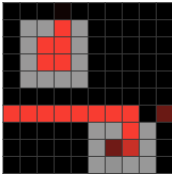

sample average

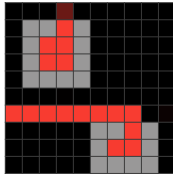

guess 1

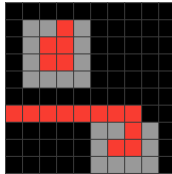

guess 2

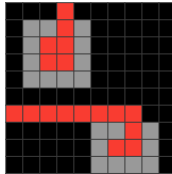

Supplement: supplementary_material [file 4e469f39_solutions.pdf › CompressARC/results_for_the_blog_post/plots_evaluation/4e469f39_solutions.pdf]

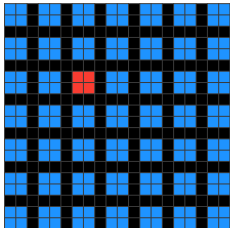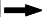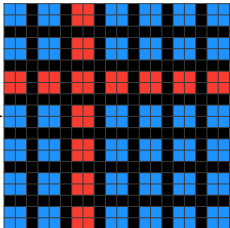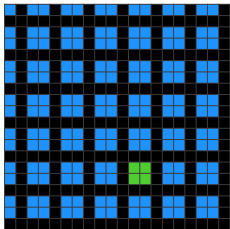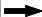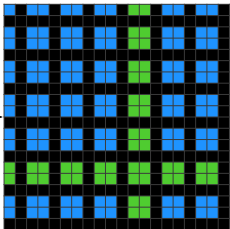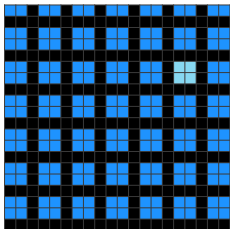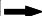

?

Supplement: supplementary_material [file 4f537728_problem.pdf › CompressARC/results_for_the_blog_post/plots_evaluation/4f537728_problem.pdf]

sample

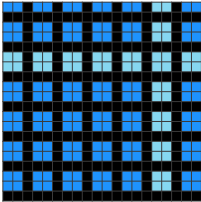

sample average

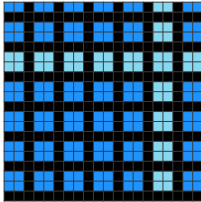

guess 1

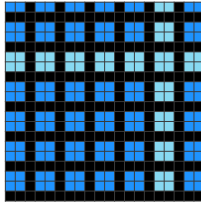

guess 2

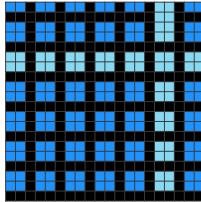

Supplement: supplementary_material [file 4f537728_solutions.pdf › CompressARC/results_for_the_blog_post/plots_evaluation/4f537728_solutions.pdf]

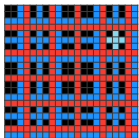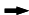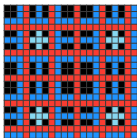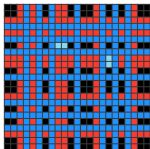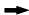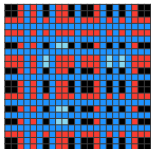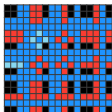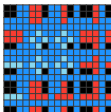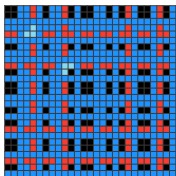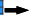

?

Supplement: supplementary_material [file 4ff4c9da_problem.pdf › CompressARC/results_for_the_blog_post/plots_evaluation/4ff4c9da_problem.pdf]

sample

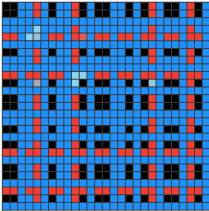

sample average

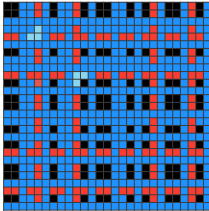

guess 1

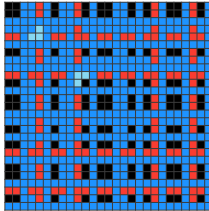

guess 2

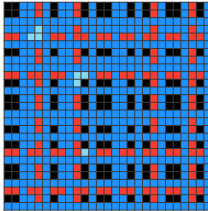

Supplement: supplementary_material [file 4ff4c9da_solutions.pdf › CompressARC/results_for_the_blog_post/plots_evaluation/4ff4c9da_solutions.pdf]

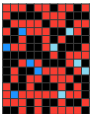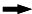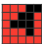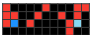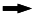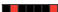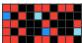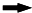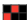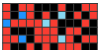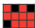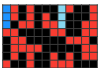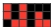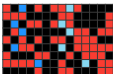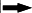

?

Supplement: supplementary_material [file 505fff84_problem.pdf › CompressARC/results_for_the_blog_post/plots_evaluation/505fff84_problem.pdf]

sample

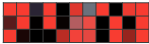

sample average

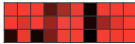

guess 1

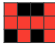

guess 2

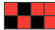

Supplement: supplementary_material [file 505fff84_solutions.pdf › CompressARC/results_for_the_blog_post/plots_evaluation/505fff84_solutions.pdf]

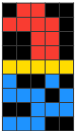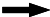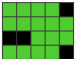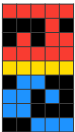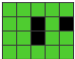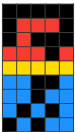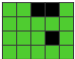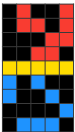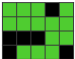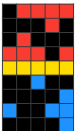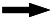

?

Supplement: supplementary_material [file 506d28a5_problem.pdf › CompressARC/results_for_the_blog_post/plots_evaluation/506d28a5_problem.pdf]

sample

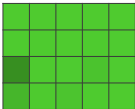

sample average

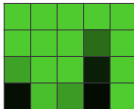

guess 1

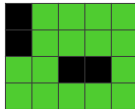

guess 2

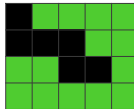

Supplement: supplementary_material [file 506d28a5_solutions.pdf › CompressARC/results_for_the_blog_post/plots_evaluation/506d28a5_solutions.pdf]

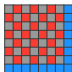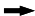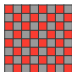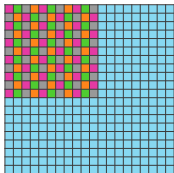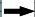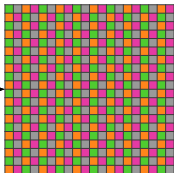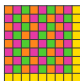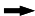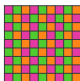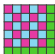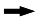

?

Supplement: supplementary_material [file 50a16a69_problem.pdf › CompressARC/results_for_the_blog_post/plots_evaluation/50a16a69_problem.pdf]

sample

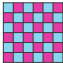

sample average

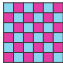

guess 1

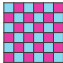

guess 2

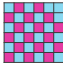

Supplement: supplementary_material [file 50a16a69_solutions.pdf › CompressARC/results_for_the_blog_post/plots_evaluation/50a16a69_solutions.pdf]

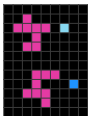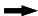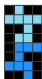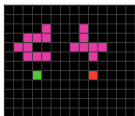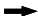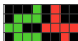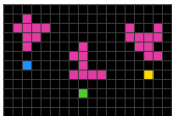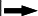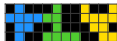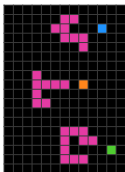

?

Supplement: supplementary_material [file 50aad11f_problem.pdf › CompressARC/results_for_the_blog_post/plots_evaluation/50aad11f_problem.pdf]

sample

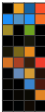

sample average

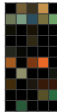

guess 1

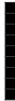

guess 2

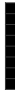

Supplement: supplementary_material [file 50aad11f_solutions.pdf › CompressARC/results_for_the_blog_post/plots_evaluation/50aad11f_solutions.pdf]

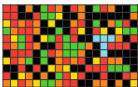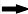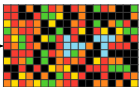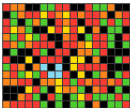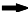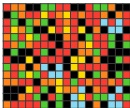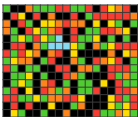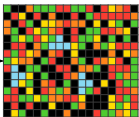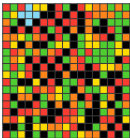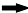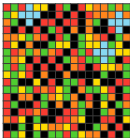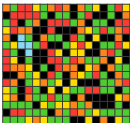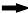

?

Supplement: supplementary_material [file 50f325b5_problem.pdf › CompressARC/results_for_the_blog_post/plots_evaluation/50f325b5_problem.pdf]

sample

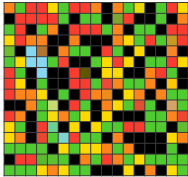

sample average

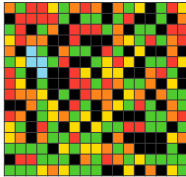

guess 1

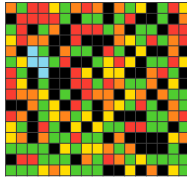

guess 2

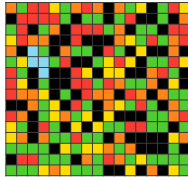

Supplement: supplementary_material [file 50f325b5_solutions.pdf › CompressARC/results_for_the_blog_post/plots_evaluation/50f325b5_solutions.pdf]

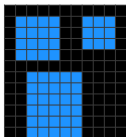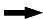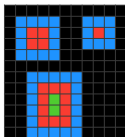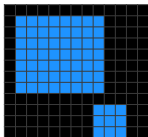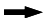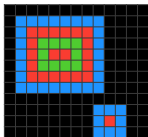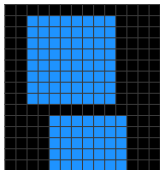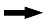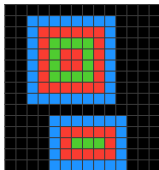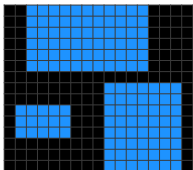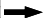

?

Supplement: supplementary_material [file 516b51b7_problem.pdf › CompressARC/results_for_the_blog_post/plots_evaluation/516b51b7_problem.pdf]

sample

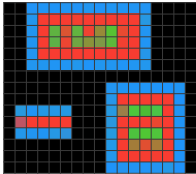

sample average

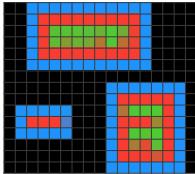

guess 1

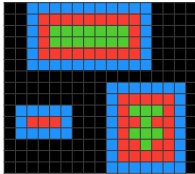

guess 2

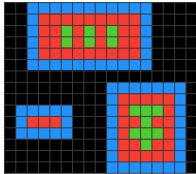

Supplement: supplementary_material [file 516b51b7_solutions.pdf › CompressARC/results_for_the_blog_post/plots_evaluation/516b51b7_solutions.pdf]

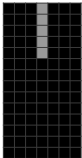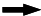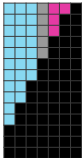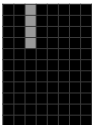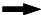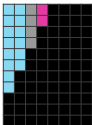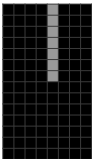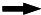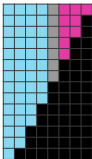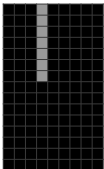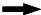

?

Supplement: supplementary_material [file 5207a7b5_problem.pdf › CompressARC/results_for_the_blog_post/plots_evaluation/5207a7b5_problem.pdf]

sample

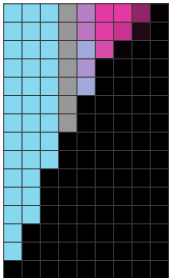

sample average

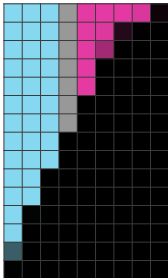

guess 1

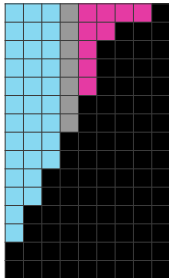

guess 2

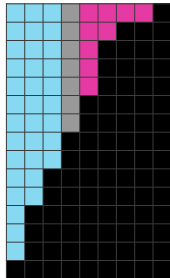

Supplement: supplementary_material [file 5207a7b5_solutions.pdf › CompressARC/results_for_the_blog_post/plots_evaluation/5207a7b5_solutions.pdf]

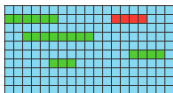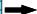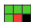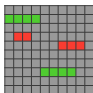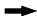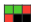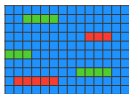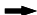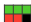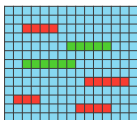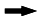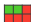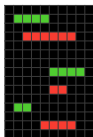

?

Supplement: supplementary_material [file 5289ad53_problem.pdf › CompressARC/results_for_the_blog_post/plots_evaluation/5289ad53_problem.pdf]

sample

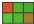

sample average

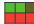

guess 1

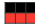

guess 2

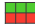

Supplement: supplementary_material [file 5289ad53_solutions.pdf › CompressARC/results_for_the_blog_post/plots_evaluation/5289ad53_solutions.pdf]

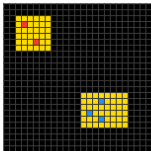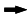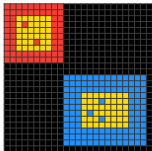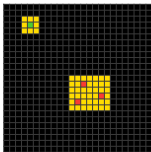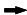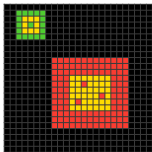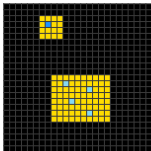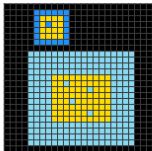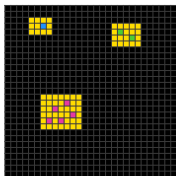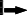

?

Supplement: supplementary_material [file 52fd389e_problem.pdf › CompressARC/results_for_the_blog_post/plots_evaluation/52fd389e_problem.pdf]

sample

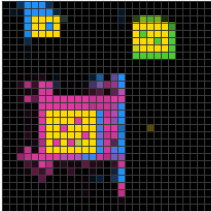

sample average

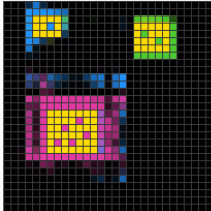

guess 1

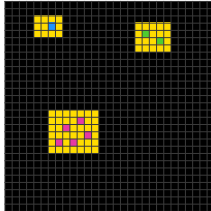

guess 2

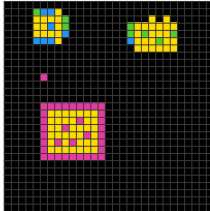

Supplement: supplementary_material [file 52fd389e_solutions.pdf › CompressARC/results_for_the_blog_post/plots_evaluation/52fd389e_solutions.pdf]

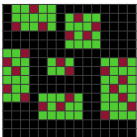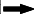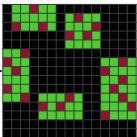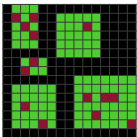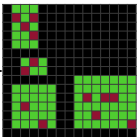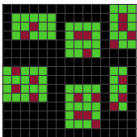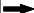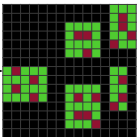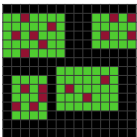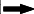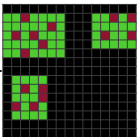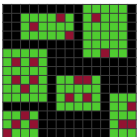

?

Supplement: supplementary_material [file 54db823b_problem.pdf › CompressARC/results_for_the_blog_post/plots_evaluation/54db823b_problem.pdf]

sample

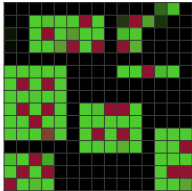

sample average

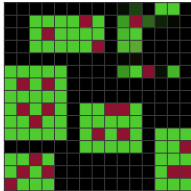

guess 1

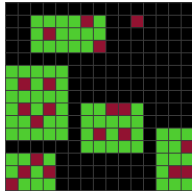

guess 2

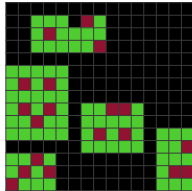

Supplement: supplementary_material [file 54db823b_solutions.pdf › CompressARC/results_for_the_blog_post/plots_evaluation/54db823b_solutions.pdf]

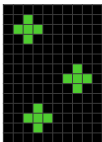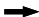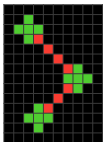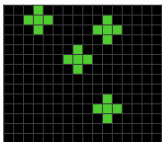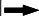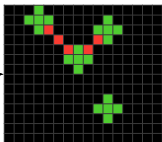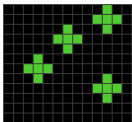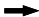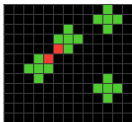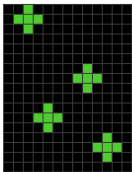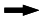

?

Supplement: supplementary_material [file 55059096_problem.pdf › CompressARC/results_for_the_blog_post/plots_evaluation/55059096_problem.pdf]

sample

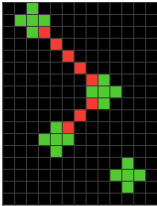

sample average

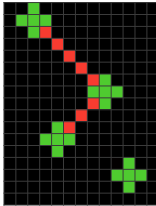

guess 1

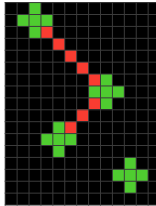

guess 2

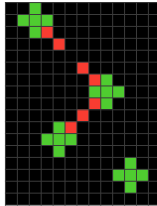

Supplement: supplementary_material [file 55059096_solutions.pdf › CompressARC/results_for_the_blog_post/plots_evaluation/55059096_solutions.pdf]

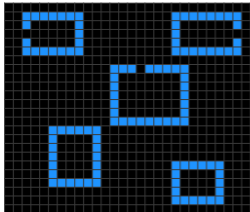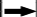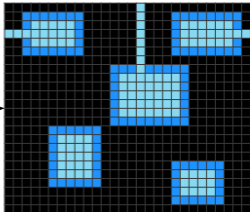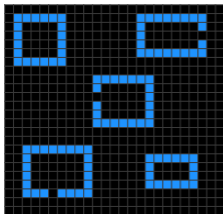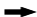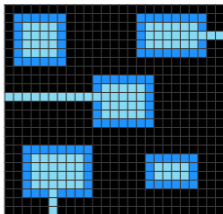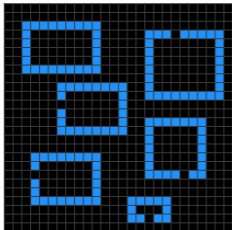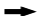

?

Supplement: supplementary_material [file 551d5bf1_problem.pdf › CompressARC/results_for_the_blog_post/plots_evaluation/551d5bf1_problem.pdf]

sample

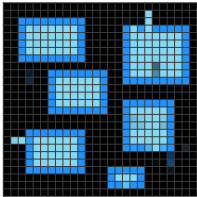

sample average

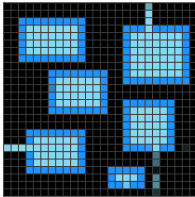

guess 1

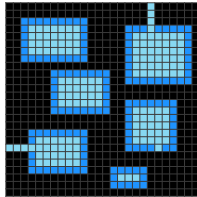

guess 2

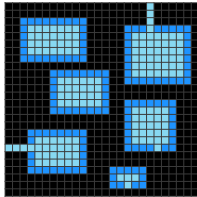

Supplement: supplementary_material [file 551d5bf1_solutions.pdf › CompressARC/results_for_the_blog_post/plots_evaluation/551d5bf1_solutions.pdf]

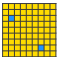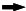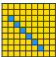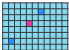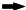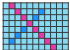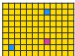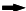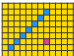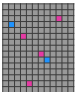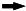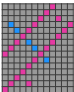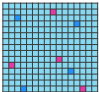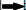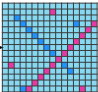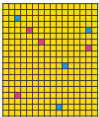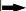

?

Supplement: supplementary_material [file 55783887_problem.pdf › CompressARC/results_for_the_blog_post/plots_evaluation/55783887_problem.pdf]

sample

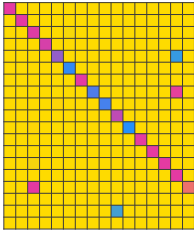

sample average

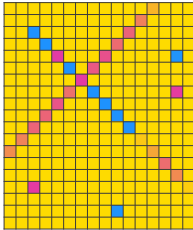

guess 1

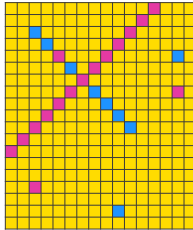

guess 2

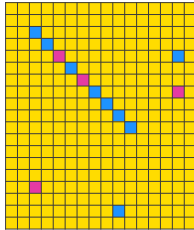

Supplement: supplementary_material [file 55783887_solutions.pdf › CompressARC/results_for_the_blog_post/plots_evaluation/55783887_solutions.pdf]

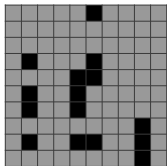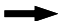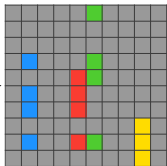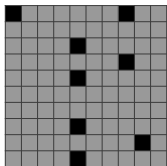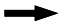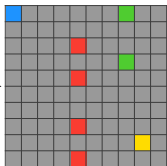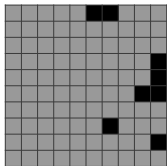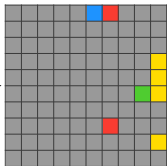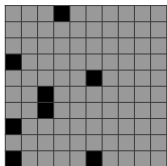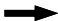

?

Supplement: supplementary_material [file 575b1a71_problem.pdf › CompressARC/results_for_the_blog_post/plots_evaluation/575b1a71_problem.pdf]

sample

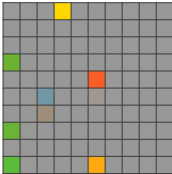

sample average

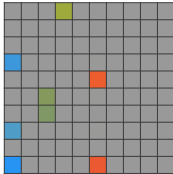

guess 1

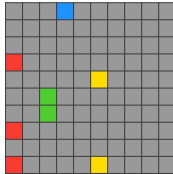

guess 2

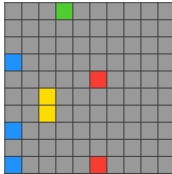

Supplement: supplementary_material [file 575b1a71_solutions.pdf › CompressARC/results_for_the_blog_post/plots_evaluation/575b1a71_solutions.pdf]

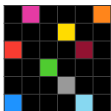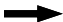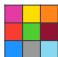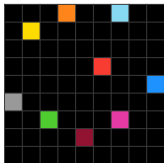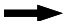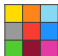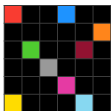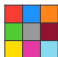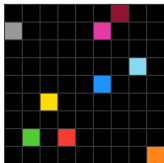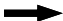

?

Supplement: supplementary_material [file 5783df64_problem.pdf › CompressARC/results_for_the_blog_post/plots_evaluation/5783df64_problem.pdf]

sample

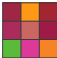

sample average

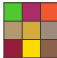

guess 1

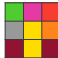

guess 2

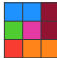

Supplement: supplementary_material [file 5783df64_solutions.pdf › CompressARC/results_for_the_blog_post/plots_evaluation/5783df64_solutions.pdf]

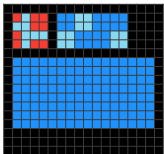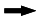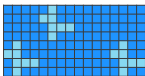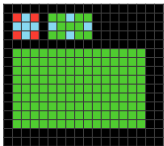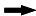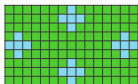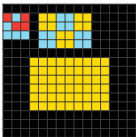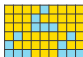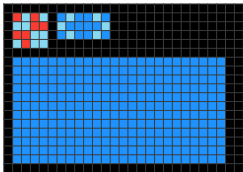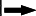

?

Supplement: supplementary_material [file 5833af48_problem.pdf › CompressARC/results_for_the_blog_post/plots_evaluation/5833af48_problem.pdf]

sample

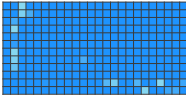

sample average

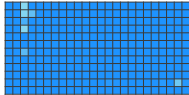

guess 1

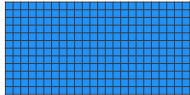

guess 2

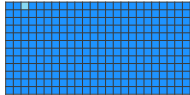

Supplement: supplementary_material [file 5833af48_solutions.pdf › CompressARC/results_for_the_blog_post/plots_evaluation/5833af48_solutions.pdf]

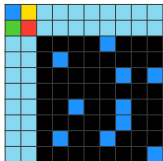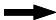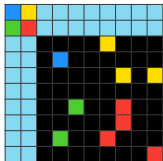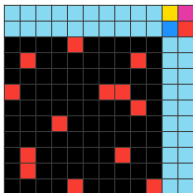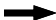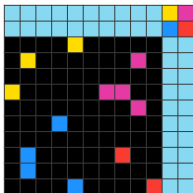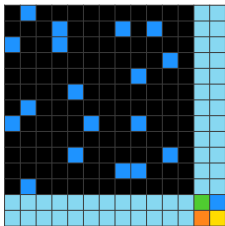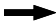

?

Supplement: supplementary_material [file 58743b76_problem.pdf › CompressARC/results_for_the_blog_post/plots_evaluation/58743b76_problem.pdf]

sample

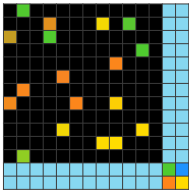

sample average

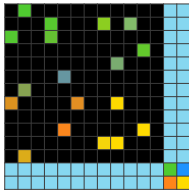

guess 1

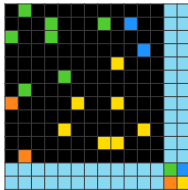

guess 2

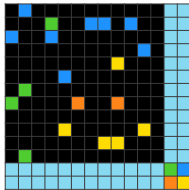

Supplement: supplementary_material [file 58743b76_solutions.pdf › CompressARC/results_for_the_blog_post/plots_evaluation/58743b76_solutions.pdf]

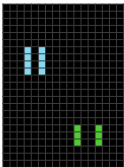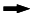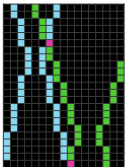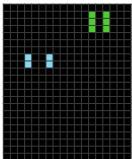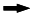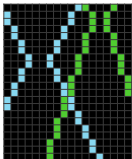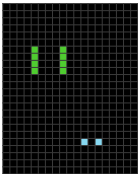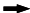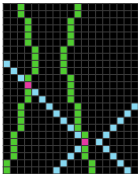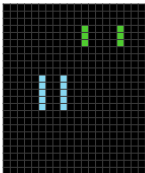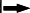

?

Supplement: supplementary_material [file 58e15b12_problem.pdf › CompressARC/results_for_the_blog_post/plots_evaluation/58e15b12_problem.pdf]

sample

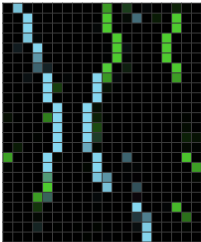

sample average

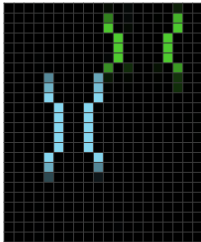

guess 1

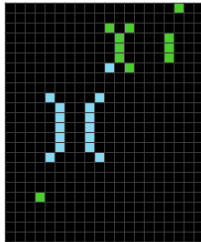

guess 2

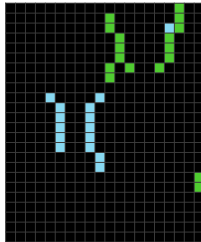

Supplement: supplementary_material [file 58e15b12_solutions.pdf › CompressARC/results_for_the_blog_post/plots_evaluation/58e15b12_solutions.pdf]

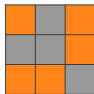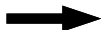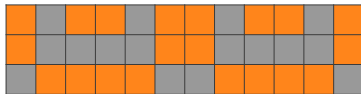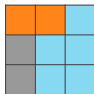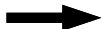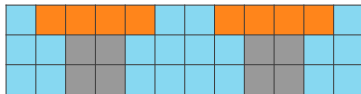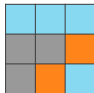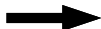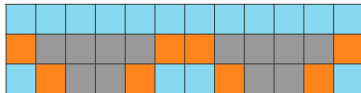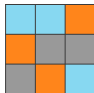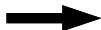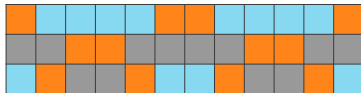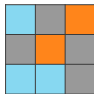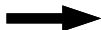

?

Supplement: supplementary_material [file 59341089_problem.pdf › CompressARC/results_for_the_blog_post/plots_evaluation/59341089_problem.pdf]

sample

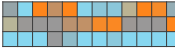

sample average

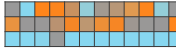

guess 1

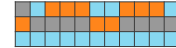

guess 2

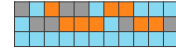

Supplement: supplementary_material [file 59341089_solutions.pdf › CompressARC/results_for_the_blog_post/plots_evaluation/59341089_solutions.pdf]

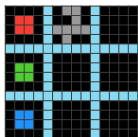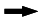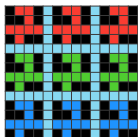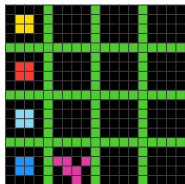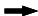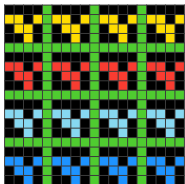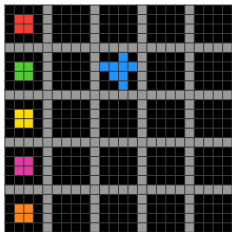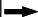

?

Supplement: supplementary_material [file 5a5a2103_problem.pdf › CompressARC/results_for_the_blog_post/plots_evaluation/5a5a2103_problem.pdf]

sample

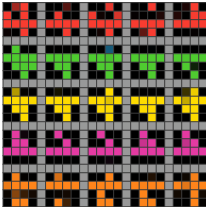

sample average

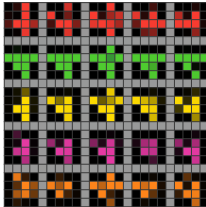

guess 1

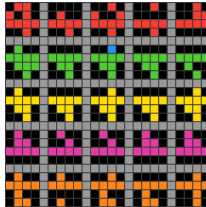

guess 2

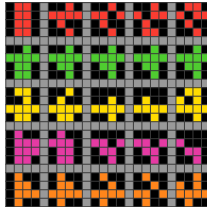

Supplement: supplementary_material [file 5a5a2103_solutions.pdf › CompressARC/results_for_the_blog_post/plots_evaluation/5a5a2103_solutions.pdf]

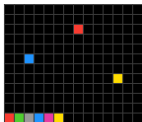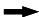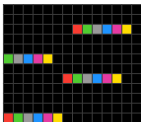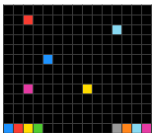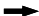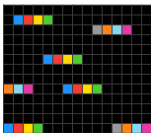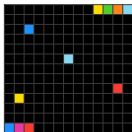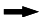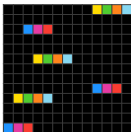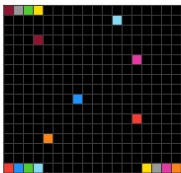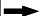

?

Supplement: supplementary_material [file 5af49b42_problem.pdf › CompressARC/results_for_the_blog_post/plots_evaluation/5af49b42_problem.pdf]
