# Supplementary material (part 12 of 17)
Source: ML conference proceedings conference paper supplement (https://openreview.net/forum?id=jLC662Yo5h)

sample

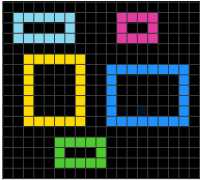

sample average

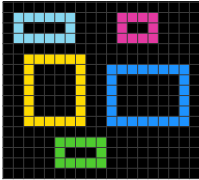

guess 1

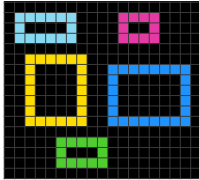

guess 2

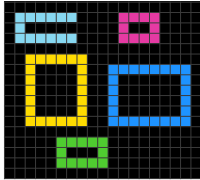

Supplement: supplementary_material [file 4347f46a_solutions.pdf › CompressARC/results_for_the_blog_post/plots_training/4347f46a_solutions.pdf]

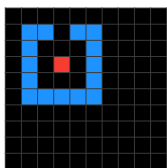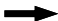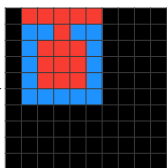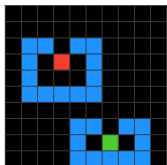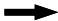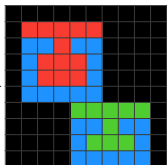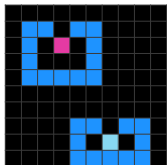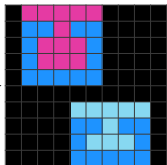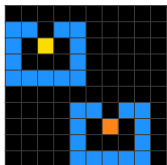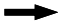

?

Supplement: supplementary_material [file 444801d8_problem.pdf › CompressARC/results_for_the_blog_post/plots_training/444801d8_problem.pdf]

sample

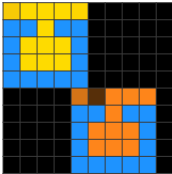

sample average

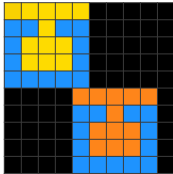

guess 1

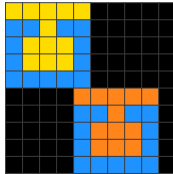

guess 2

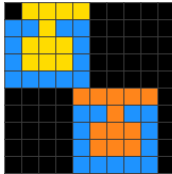

Supplement: supplementary_material [file 444801d8_solutions.pdf › CompressARC/results_for_the_blog_post/plots_training/444801d8_solutions.pdf]

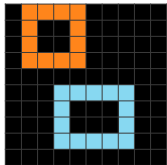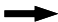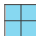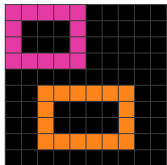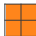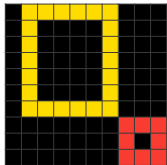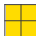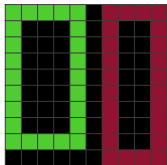

?

Supplement: supplementary_material [file 445eab21_problem.pdf › CompressARC/results_for_the_blog_post/plots_training/445eab21_problem.pdf]

sample

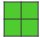

sample average

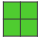

guess 1

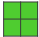

guess 2

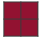

Supplement: supplementary_material [file 445eab21_solutions.pdf › CompressARC/results_for_the_blog_post/plots_training/445eab21_solutions.pdf]

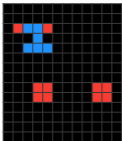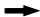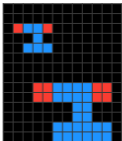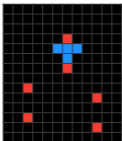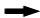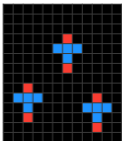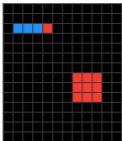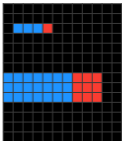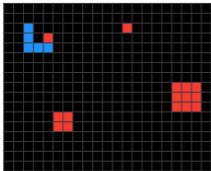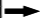

?

Supplement: supplementary_material [file 447fd412_problem.pdf › CompressARC/results_for_the_blog_post/plots_training/447fd412_problem.pdf]

sample

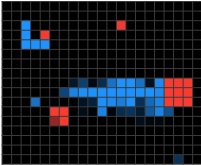

sample average

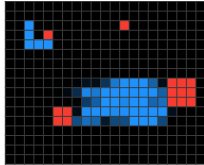

guess 1

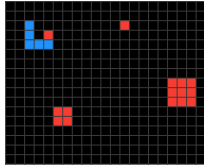

guess 2

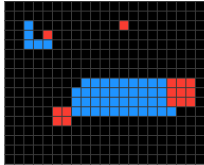

Supplement: supplementary_material [file 447fd412_solutions.pdf › CompressARC/results_for_the_blog_post/plots_training/447fd412_solutions.pdf]

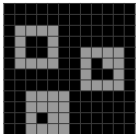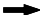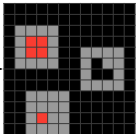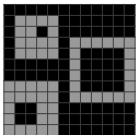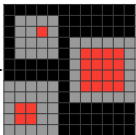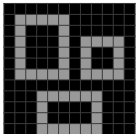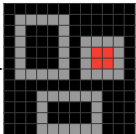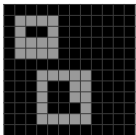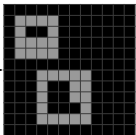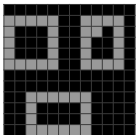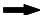

?

Supplement: supplementary_material [file 44d8ac46_problem.pdf › CompressARC/results_for_the_blog_post/plots_training/44d8ac46_problem.pdf]

sample

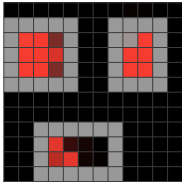

sample average

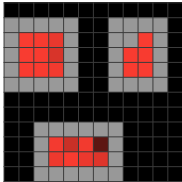

guess 1

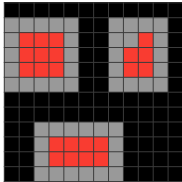

guess 2

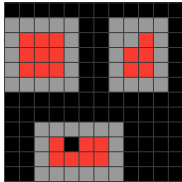

Supplement: supplementary_material [file 44d8ac46_solutions.pdf › CompressARC/results_for_the_blog_post/plots_training/44d8ac46_solutions.pdf]

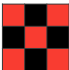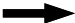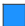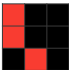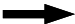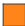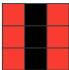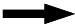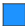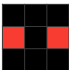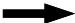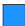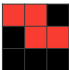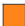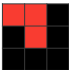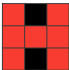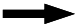

?

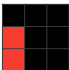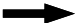

?

Supplement: supplementary_material [file 44f52bb0_problem.pdf › CompressARC/results_for_the_blog_post/plots_training/44f52bb0_problem.pdf]

sample

sample average

guess 1

guess 2

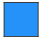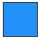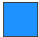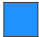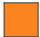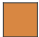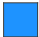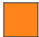

Supplement: supplementary_material [file 44f52bb0_solutions.pdf › CompressARC/results_for_the_blog_post/plots_training/44f52bb0_solutions.pdf]

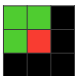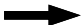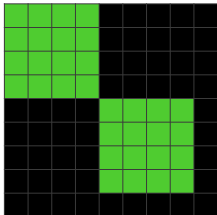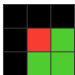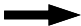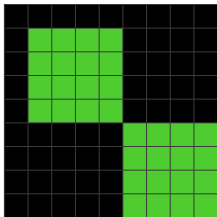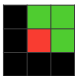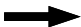

?

Supplement: supplementary_material [file 4522001f_problem.pdf › CompressARC/results_for_the_blog_post/plots_training/4522001f_problem.pdf]

sample

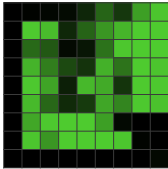

sample average

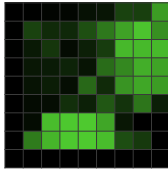

guess 1

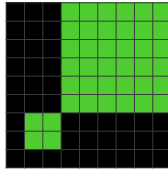

guess 2

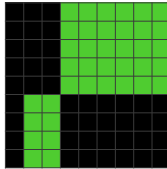

Supplement: supplementary_material [file 4522001f_solutions.pdf › CompressARC/results_for_the_blog_post/plots_training/4522001f_solutions.pdf]

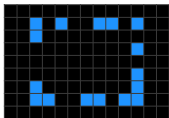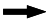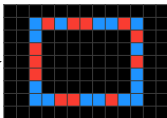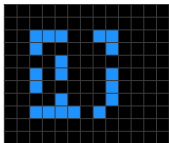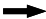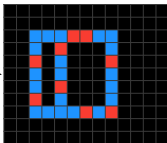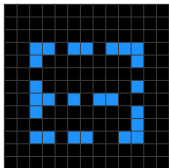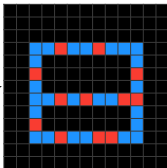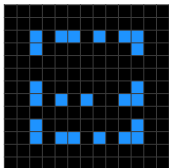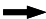

?

Supplement: supplementary_material [file 4612dd53_problem.pdf › CompressARC/results_for_the_blog_post/plots_training/4612dd53_problem.pdf]

sample

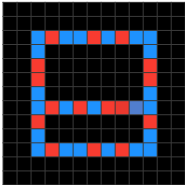

sample average

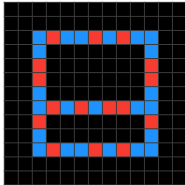

guess 1

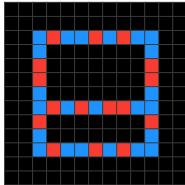

guess 2

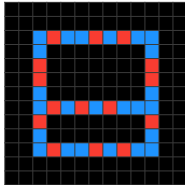

Supplement: supplementary_material [file 4612dd53_solutions.pdf › CompressARC/results_for_the_blog_post/plots_training/4612dd53_solutions.pdf]

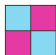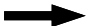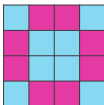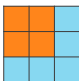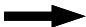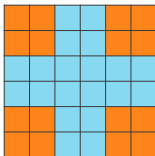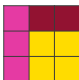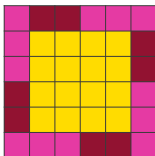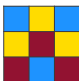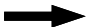

?

Supplement: supplementary_material [file 46442a0e_problem.pdf › CompressARC/results_for_the_blog_post/plots_training/46442a0e_problem.pdf]

sample

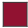

sample average

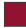

guess 1

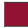

guess 2

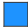

Supplement: supplementary_material [file 46442a0e_solutions.pdf › CompressARC/results_for_the_blog_post/plots_training/46442a0e_solutions.pdf]

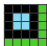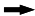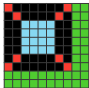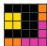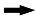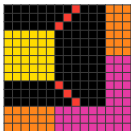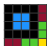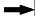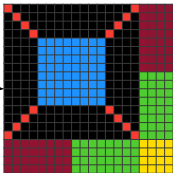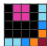

?

Supplement: supplementary_material [file 469497ad_problem.pdf › CompressARC/results_for_the_blog_post/plots_training/469497ad_problem.pdf]

sample

sample average

guess 1

guess 2

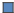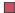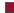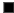

Supplement: supplementary_material [file 469497ad_solutions.pdf › CompressARC/results_for_the_blog_post/plots_training/469497ad_solutions.pdf]

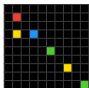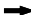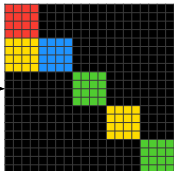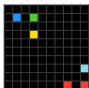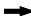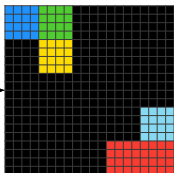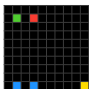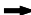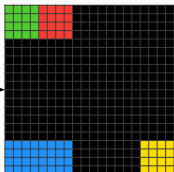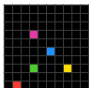

?

Supplement: supplementary_material [file 46f33fce_problem.pdf › CompressARC/results_for_the_blog_post/plots_training/46f33fce_problem.pdf]

sample

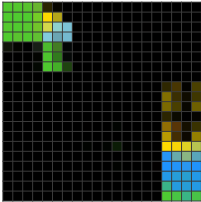

sample average

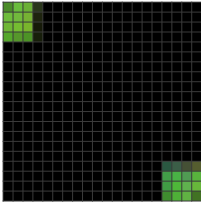

guess 1

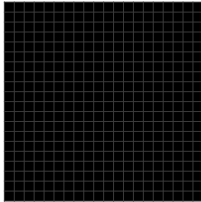

guess 2

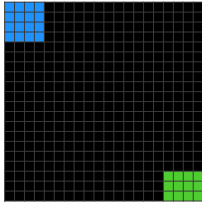

Supplement: supplementary_material [file 46f33fce_solutions.pdf › CompressARC/results_for_the_blog_post/plots_training/46f33fce_solutions.pdf]

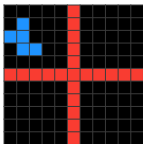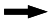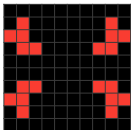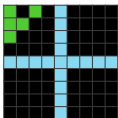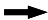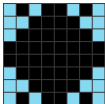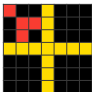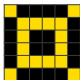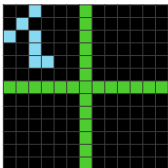

?

Supplement: supplementary_material [file 47c1f68c_problem.pdf › CompressARC/results_for_the_blog_post/plots_training/47c1f68c_problem.pdf]

sample

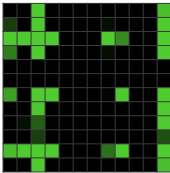

sample average

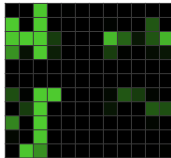

guess 1

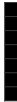

guess 2

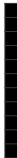

Supplement: supplementary_material [file 47c1f68c_solutions.pdf › CompressARC/results_for_the_blog_post/plots_training/47c1f68c_solutions.pdf]

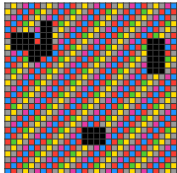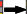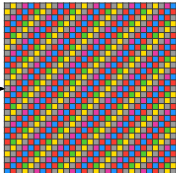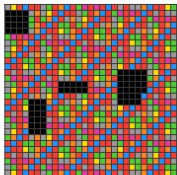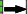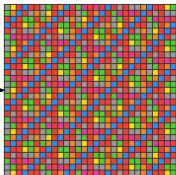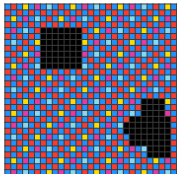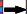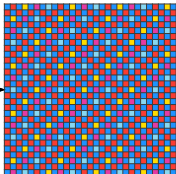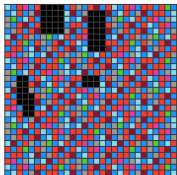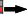

?

Supplement: supplementary_material [file 484b58aa_problem.pdf › CompressARC/results_for_the_blog_post/plots_training/484b58aa_problem.pdf]

sample

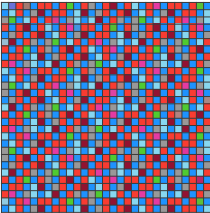

sample average

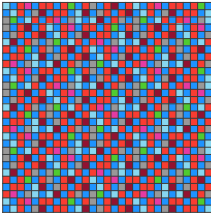

guess 1

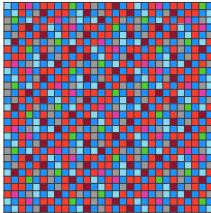

guess 2

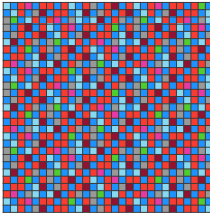

Supplement: supplementary_material [file 484b58aa_solutions.pdf › CompressARC/results_for_the_blog_post/plots_training/484b58aa_solutions.pdf]

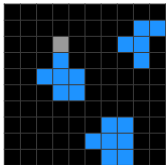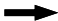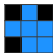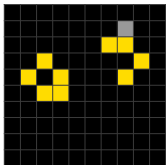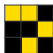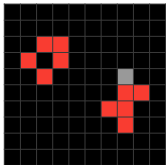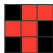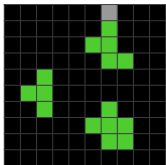

?

Supplement: supplementary_material [file 48d8fb45_problem.pdf › CompressARC/results_for_the_blog_post/plots_training/48d8fb45_problem.pdf]

sample

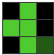

sample average

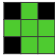

guess 1

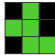

guess 2

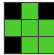

Supplement: supplementary_material [file 48d8fb45_solutions.pdf › CompressARC/results_for_the_blog_post/plots_training/48d8fb45_solutions.pdf]

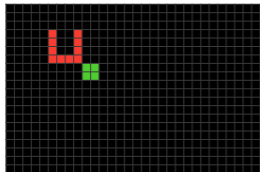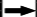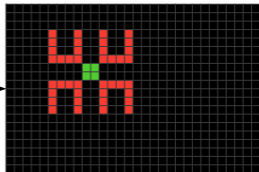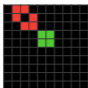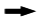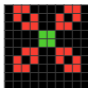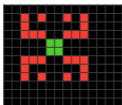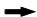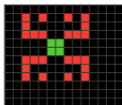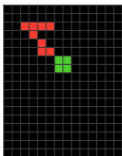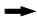

?

Supplement: supplementary_material [file 4938f0c2_problem.pdf › CompressARC/results_for_the_blog_post/plots_training/4938f0c2_problem.pdf]

sample

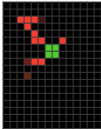

sample average

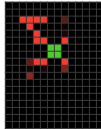

guess 1

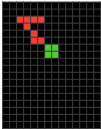

guess 2

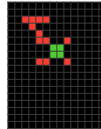

Supplement: supplementary_material [file 4938f0c2_solutions.pdf › CompressARC/results_for_the_blog_post/plots_training/4938f0c2_solutions.pdf]

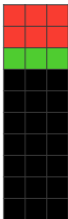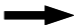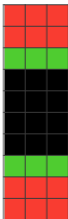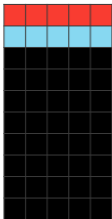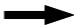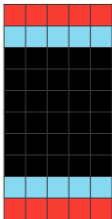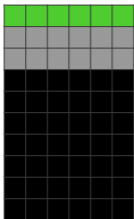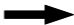

?

Supplement: supplementary_material [file 496994bd_problem.pdf › CompressARC/results_for_the_blog_post/plots_training/496994bd_problem.pdf]

sample

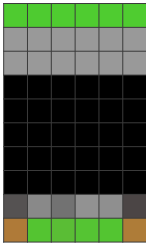

sample average

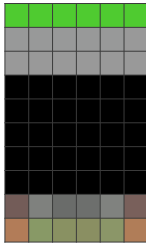

guess 1

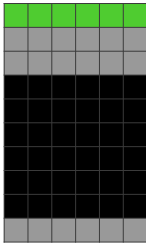

guess 2

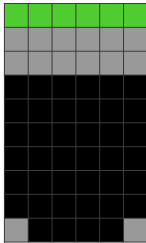

Supplement: supplementary_material [file 496994bd_solutions.pdf › CompressARC/results_for_the_blog_post/plots_training/496994bd_solutions.pdf]

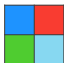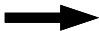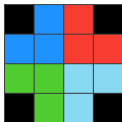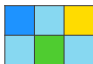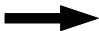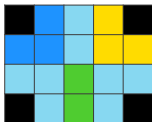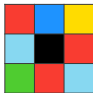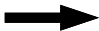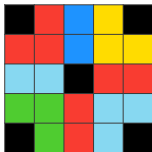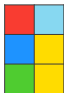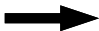

?

Supplement: supplementary_material [file 49d1d64f_problem.pdf › CompressARC/results_for_the_blog_post/plots_training/49d1d64f_problem.pdf]

sample

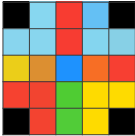

sample average

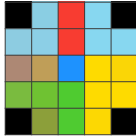

guess 1

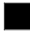

guess 2

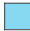

Supplement: supplementary_material [file 49d1d64f_solutions.pdf › CompressARC/results_for_the_blog_post/plots_training/49d1d64f_solutions.pdf]

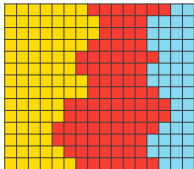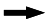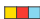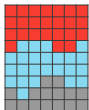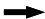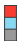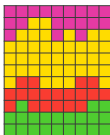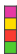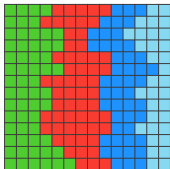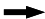

?

Supplement: supplementary_material [file 4be741c5_problem.pdf › CompressARC/results_for_the_blog_post/plots_training/4be741c5_problem.pdf]

sample

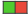

sample average

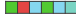

guess 1

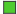

guess 2

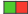

Supplement: supplementary_material [file 4be741c5_solutions.pdf › CompressARC/results_for_the_blog_post/plots_training/4be741c5_solutions.pdf]

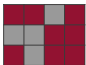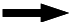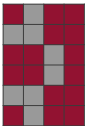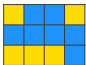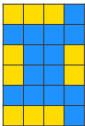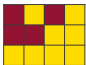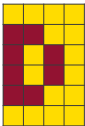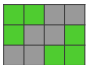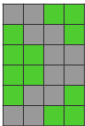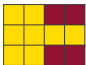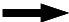

?

Supplement: supplementary_material [file 4c4377d9_problem.pdf › CompressARC/results_for_the_blog_post/plots_training/4c4377d9_problem.pdf]

sample

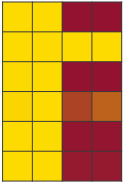

sample average

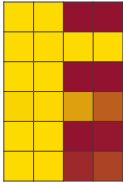

guess 1

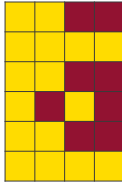

guess 2

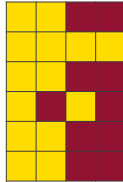

Supplement: supplementary_material [file 4c4377d9_solutions.pdf › CompressARC/results_for_the_blog_post/plots_training/4c4377d9_solutions.pdf]

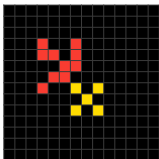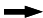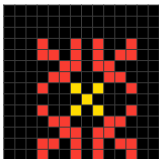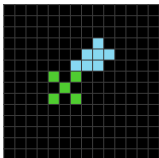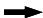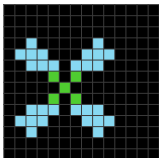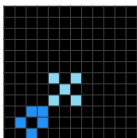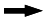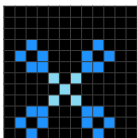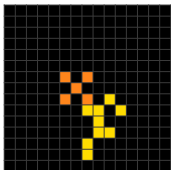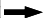

?

Supplement: supplementary_material [file 4c5c2cf0_problem.pdf › CompressARC/results_for_the_blog_post/plots_training/4c5c2cf0_problem.pdf]

sample

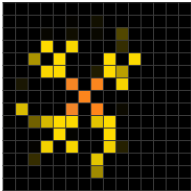

sample average

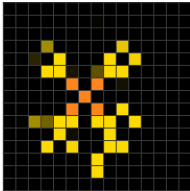

guess 1

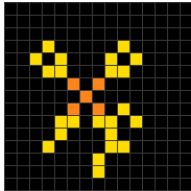

guess 2

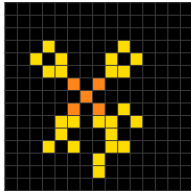

Supplement: supplementary_material [file 4c5c2cf0_solutions.pdf › CompressARC/results_for_the_blog_post/plots_training/4c5c2cf0_solutions.pdf]

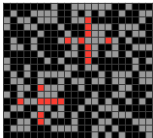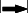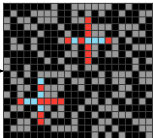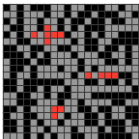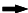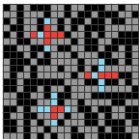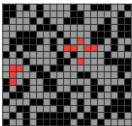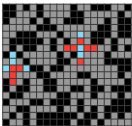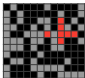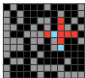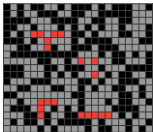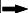

?

Supplement: supplementary_material [file 50846271_problem.pdf › CompressARC/results_for_the_blog_post/plots_training/50846271_problem.pdf]

sample

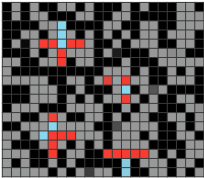

sample average

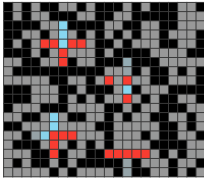

guess 1

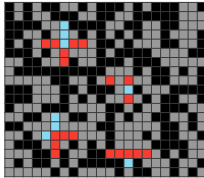

guess 2

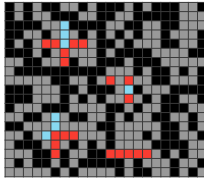

Supplement: supplementary_material [file 50846271_solutions.pdf › CompressARC/results_for_the_blog_post/plots_training/50846271_solutions.pdf]

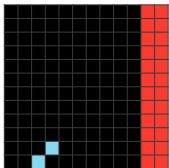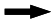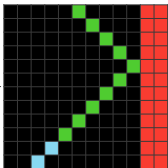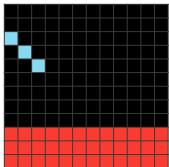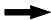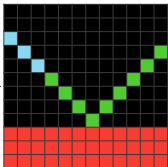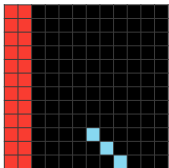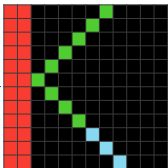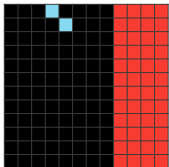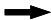

?

Supplement: supplementary_material [file 508bd3b6_problem.pdf › CompressARC/results_for_the_blog_post/plots_training/508bd3b6_problem.pdf]

sample

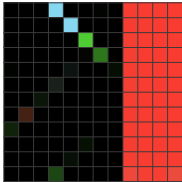

sample average

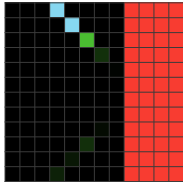

guess 1

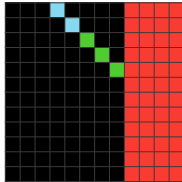

guess 2

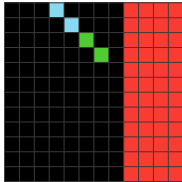

Supplement: supplementary_material [file 508bd3b6_solutions.pdf › CompressARC/results_for_the_blog_post/plots_training/508bd3b6_solutions.pdf]

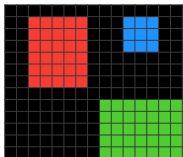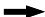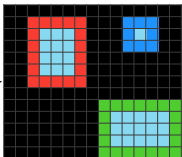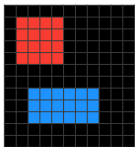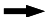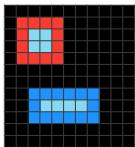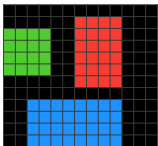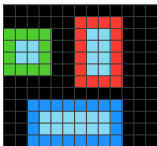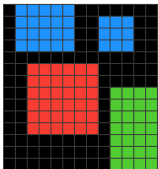

?

Supplement: supplementary_material [file 50cb2852_problem.pdf › CompressARC/results_for_the_blog_post/plots_training/50cb2852_problem.pdf]

sample

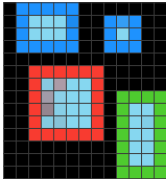

sample average

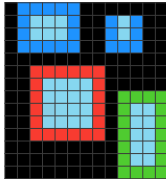

guess 1

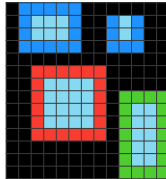

guess 2

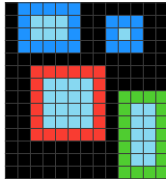

Supplement: supplementary_material [file 50cb2852_solutions.pdf › CompressARC/results_for_the_blog_post/plots_training/50cb2852_solutions.pdf]

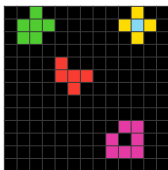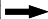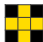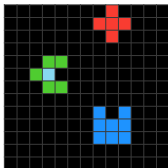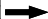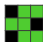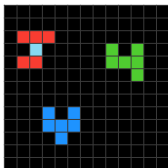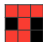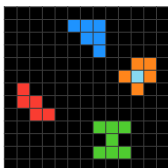

?

Supplement: supplementary_material [file 5117e062_problem.pdf › CompressARC/results_for_the_blog_post/plots_training/5117e062_problem.pdf]

sample

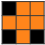

sample average

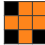

guess 1

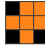

guess 2

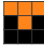

Supplement: supplementary_material [file 5117e062_solutions.pdf › CompressARC/results_for_the_blog_post/plots_training/5117e062_solutions.pdf]

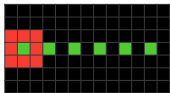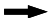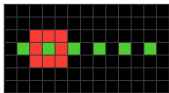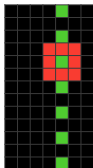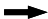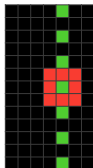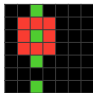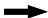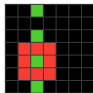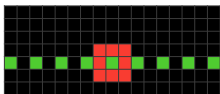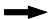

?

Supplement: supplementary_material [file 5168d44c_problem.pdf › CompressARC/results_for_the_blog_post/plots_training/5168d44c_problem.pdf]

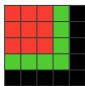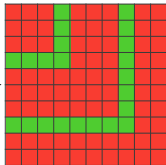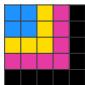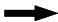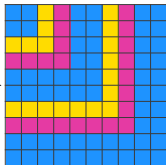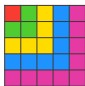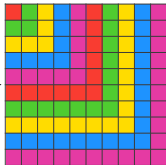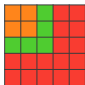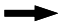

?

Supplement: supplementary_material [file 539a4f51_problem.pdf › CompressARC/results_for_the_blog_post/plots_training/539a4f51_problem.pdf]

sample

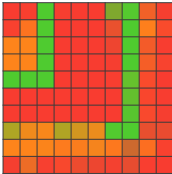

sample average

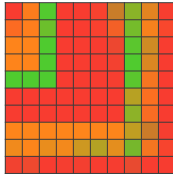

guess 1

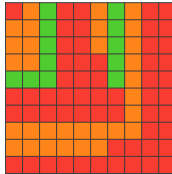

guess 2

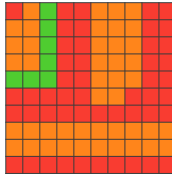

Supplement: supplementary_material [file 539a4f51_solutions.pdf › CompressARC/results_for_the_blog_post/plots_training/539a4f51_solutions.pdf]

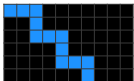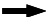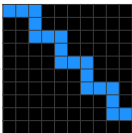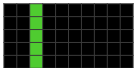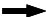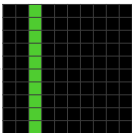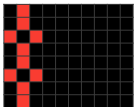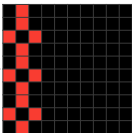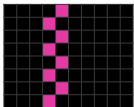

?

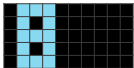

?

Supplement: supplementary_material [file 53b68214_problem.pdf › CompressARC/results_for_the_blog_post/plots_training/53b68214_problem.pdf]

sample

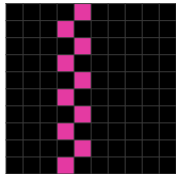

sample average

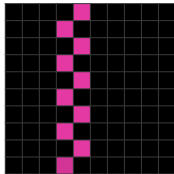

guess 1

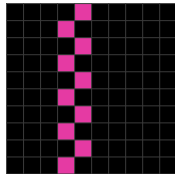

guess 2

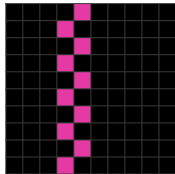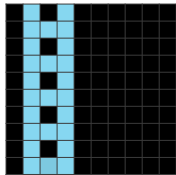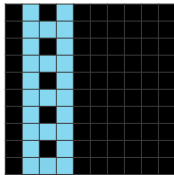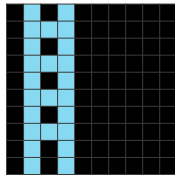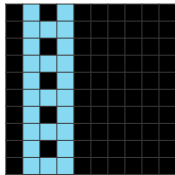

Supplement: supplementary_material [file 53b68214_solutions.pdf › CompressARC/results_for_the_blog_post/plots_training/53b68214_solutions.pdf]

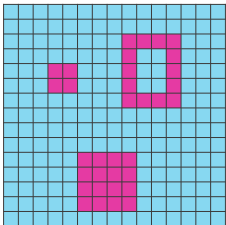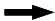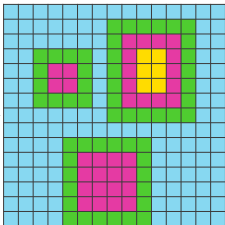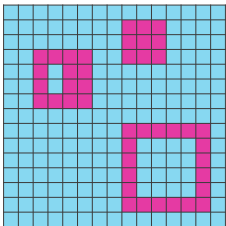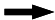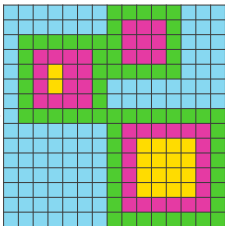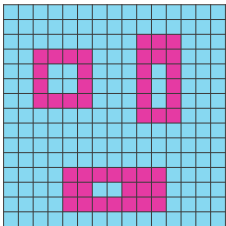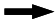

?

Supplement: supplementary_material [file 543a7ed5_problem.pdf › CompressARC/results_for_the_blog_post/plots_training/543a7ed5_problem.pdf]

sample

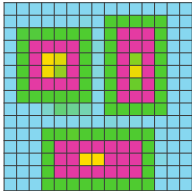

sample average

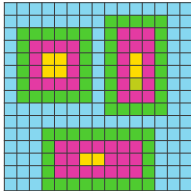

guess 1

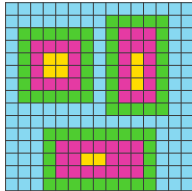

guess 2

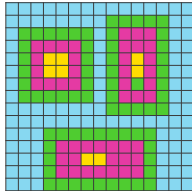

Supplement: supplementary_material [file 543a7ed5_solutions.pdf › CompressARC/results_for_the_blog_post/plots_training/543a7ed5_solutions.pdf]

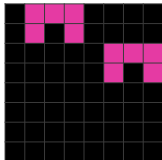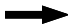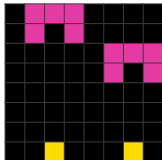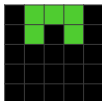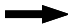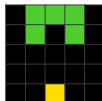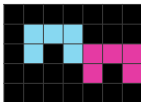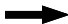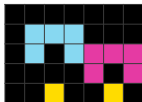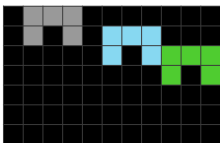

?

Supplement: supplementary_material [file 54d82841_problem.pdf › CompressARC/results_for_the_blog_post/plots_training/54d82841_problem.pdf]

sample

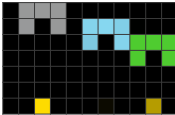

sample average

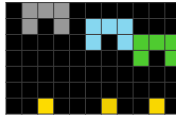

guess 1

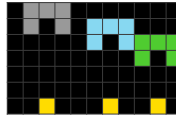

guess 2

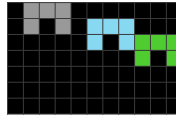

Supplement: supplementary_material [file 54d82841_solutions.pdf › CompressARC/results_for_the_blog_post/plots_training/54d82841_solutions.pdf]

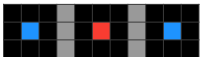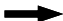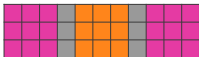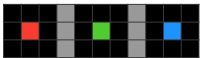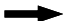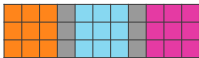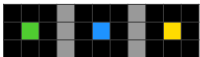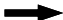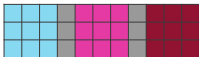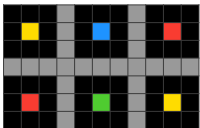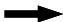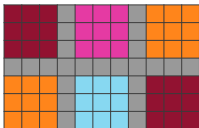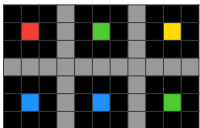

?

Supplement: supplementary_material [file 54d9e175_problem.pdf › CompressARC/results_for_the_blog_post/plots_training/54d9e175_problem.pdf]

sample

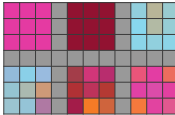

sample average

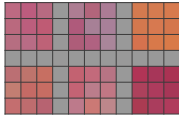

guess 1

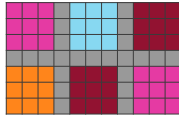

guess 2

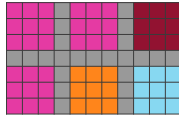

Supplement: supplementary_material [file 54d9e175_solutions.pdf › CompressARC/results_for_the_blog_post/plots_training/54d9e175_solutions.pdf]

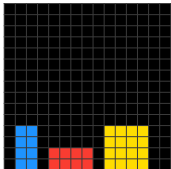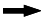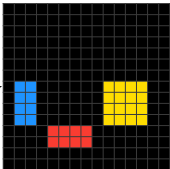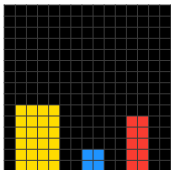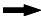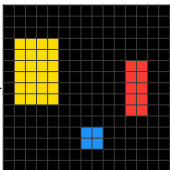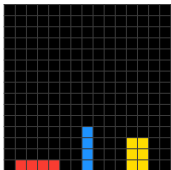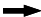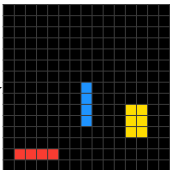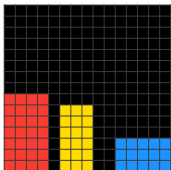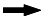

?

Supplement: supplementary_material [file 5521c0d9_problem.pdf › CompressARC/results_for_the_blog_post/plots_training/5521c0d9_problem.pdf]

sample

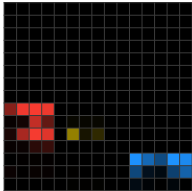

sample average

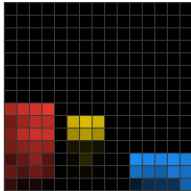

guess 1

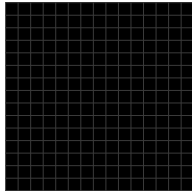

guess 2

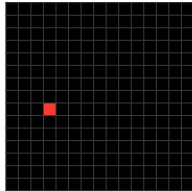

Supplement: supplementary_material [file 5521c0d9_solutions.pdf › CompressARC/results_for_the_blog_post/plots_training/5521c0d9_solutions.pdf]

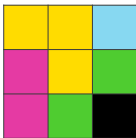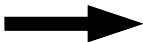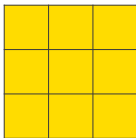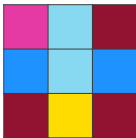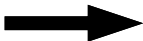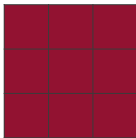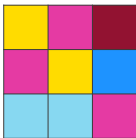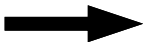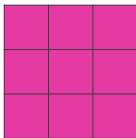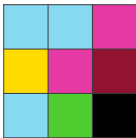

?

Supplement: supplementary_material [file 5582e5ca_problem.pdf › CompressARC/results_for_the_blog_post/plots_training/5582e5ca_problem.pdf]

sample

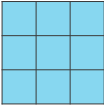

sample average

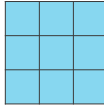

guess 1

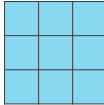

guess 2

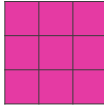

Supplement: supplementary_material [file 5582e5ca_solutions.pdf › CompressARC/results_for_the_blog_post/plots_training/5582e5ca_solutions.pdf]

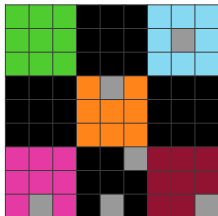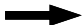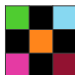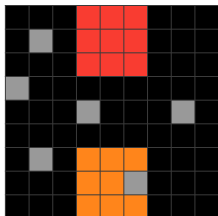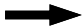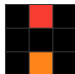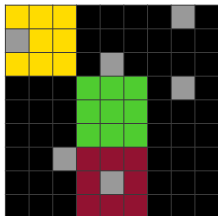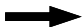

?

Supplement: supplementary_material [file 5614dbcf_problem.pdf › CompressARC/results_for_the_blog_post/plots_training/5614dbcf_problem.pdf]

sample

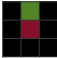

sample average

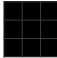

guess 1

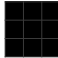

guess 2

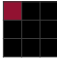

Supplement: supplementary_material [file 5614dbcf_solutions.pdf › CompressARC/results_for_the_blog_post/plots_training/5614dbcf_solutions.pdf]

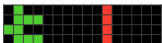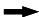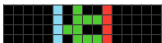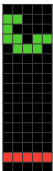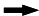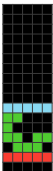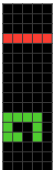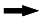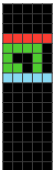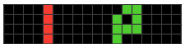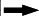

?

Supplement: supplementary_material [file 56dc2b01_problem.pdf › CompressARC/results_for_the_blog_post/plots_training/56dc2b01_problem.pdf]

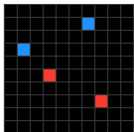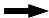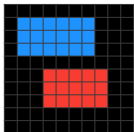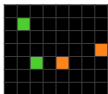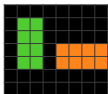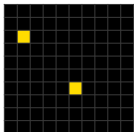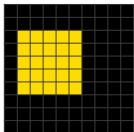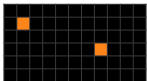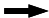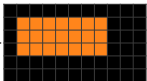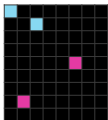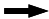

?

Supplement: supplementary_material [file 56ff96f3_problem.pdf › CompressARC/results_for_the_blog_post/plots_training/56ff96f3_problem.pdf]

sample

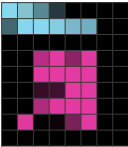

sample average

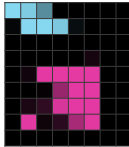

guess 1

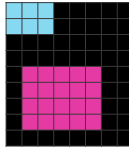

guess 2

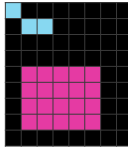

Supplement: supplementary_material [file 56ff96f3_solutions.pdf › CompressARC/results_for_the_blog_post/plots_training/56ff96f3_solutions.pdf]

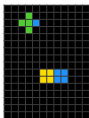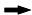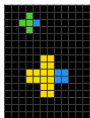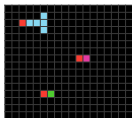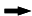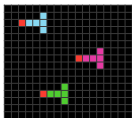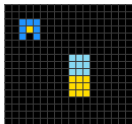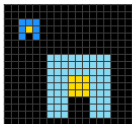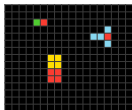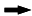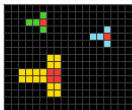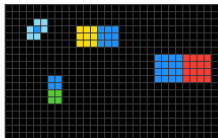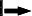

?

Supplement: supplementary_material [file 57aa92db_problem.pdf › CompressARC/results_for_the_blog_post/plots_training/57aa92db_problem.pdf]

sample

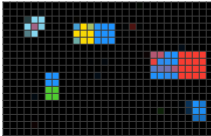

sample average

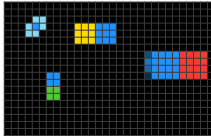

guess 1

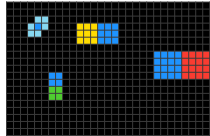

guess 2

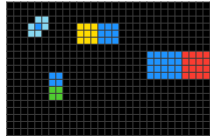

Supplement: supplementary_material [file 57aa92db_solutions.pdf › CompressARC/results_for_the_blog_post/plots_training/57aa92db_solutions.pdf]

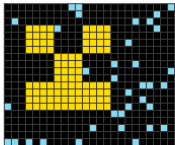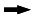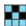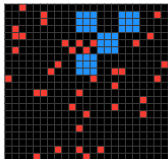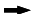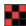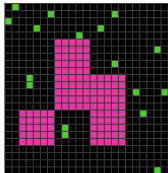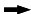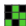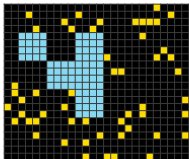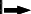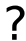

Supplement: supplementary_material [file 5ad4f10b_problem.pdf › CompressARC/results_for_the_blog_post/plots_training/5ad4f10b_problem.pdf]

sample

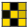

sample average

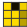

guess 1

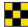

guess 2

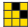

Supplement: supplementary_material [file 5ad4f10b_solutions.pdf › CompressARC/results_for_the_blog_post/plots_training/5ad4f10b_solutions.pdf]

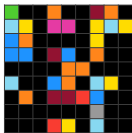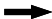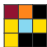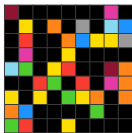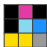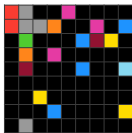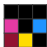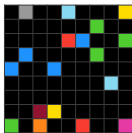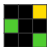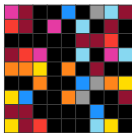

?

Supplement: supplementary_material [file 5bd6f4ac_problem.pdf › CompressARC/results_for_the_blog_post/plots_training/5bd6f4ac_problem.pdf]

sample

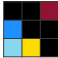

sample average

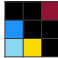

guess 1

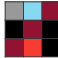

guess 2

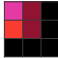

Supplement: supplementary_material [file 5bd6f4ac_solutions.pdf › CompressARC/results_for_the_blog_post/plots_training/5bd6f4ac_solutions.pdf]

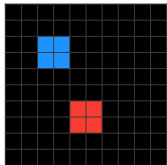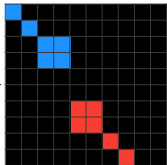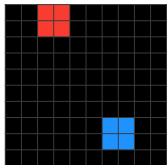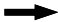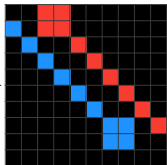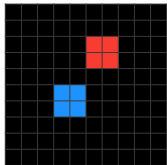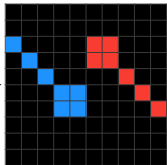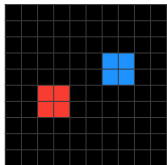

?

Supplement: supplementary_material [file 5c0a986e_problem.pdf › CompressARC/results_for_the_blog_post/plots_training/5c0a986e_problem.pdf]

sample

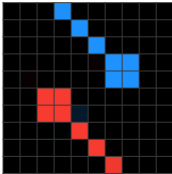

sample average

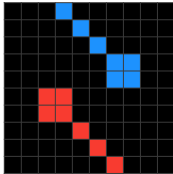

guess 1

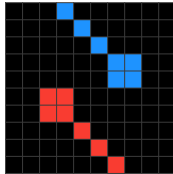

guess 2

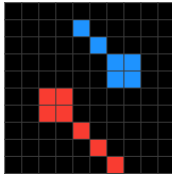

Supplement: supplementary_material [file 5c0a986e_solutions.pdf › CompressARC/results_for_the_blog_post/plots_training/5c0a986e_solutions.pdf]

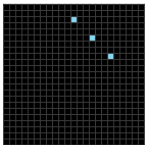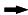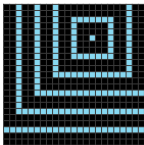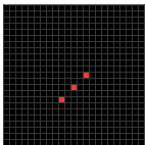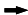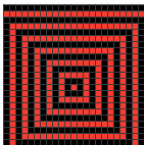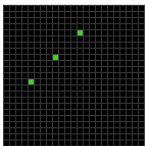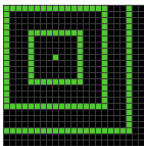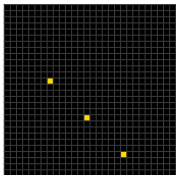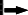

?

Supplement: supplementary_material [file 5c2c9af4_problem.pdf › CompressARC/results_for_the_blog_post/plots_training/5c2c9af4_problem.pdf]

sample

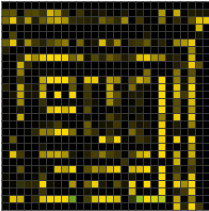

sample average

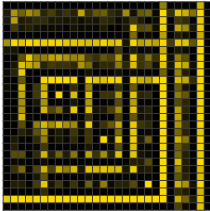

guess 1

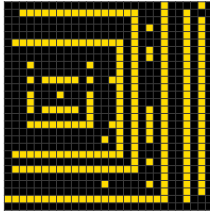

guess 2

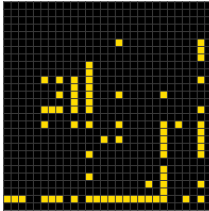

Supplement: supplementary_material [file 5c2c9af4_solutions.pdf › CompressARC/results_for_the_blog_post/plots_training/5c2c9af4_solutions.pdf]

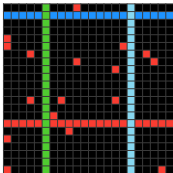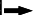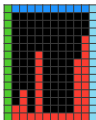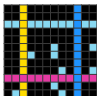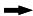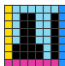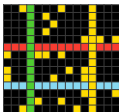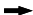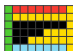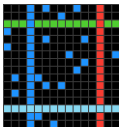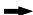

?

Supplement: supplementary_material [file 5daaa586_problem.pdf › CompressARC/results_for_the_blog_post/plots_training/5daaa586_problem.pdf]

sample

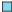

sample average

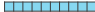

guess 1

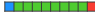

guess 2

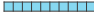

Supplement: supplementary_material [file 5daaa586_solutions.pdf › CompressARC/results_for_the_blog_post/plots_training/5daaa586_solutions.pdf]

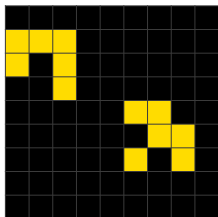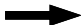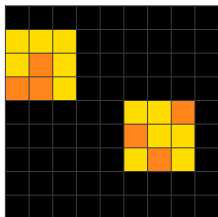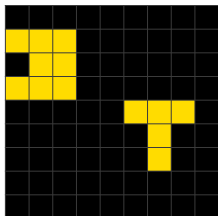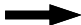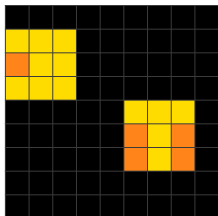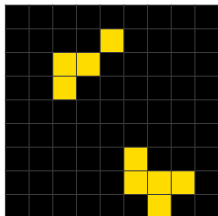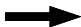

?

Supplement: supplementary_material [file 60b61512_problem.pdf › CompressARC/results_for_the_blog_post/plots_training/60b61512_problem.pdf]

sample

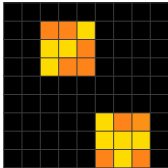

sample average

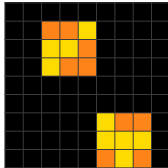

guess 1

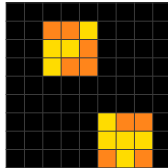

guess 2

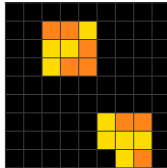

Supplement: supplementary_material [file 60b61512_solutions.pdf › CompressARC/results_for_the_blog_post/plots_training/60b61512_solutions.pdf]

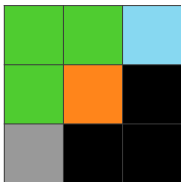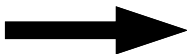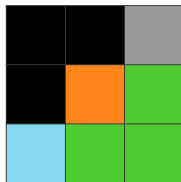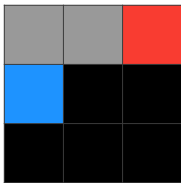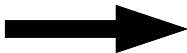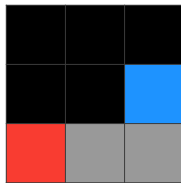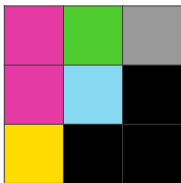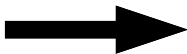

?

Supplement: supplementary_material [file 6150a2bd_problem.pdf › CompressARC/results_for_the_blog_post/plots_training/6150a2bd_problem.pdf]

sample

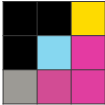

sample average

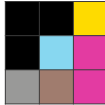

guess 1

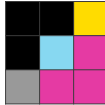

guess 2

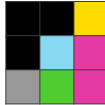

Supplement: supplementary_material [file 6150a2bd_solutions.pdf › CompressARC/results_for_the_blog_post/plots_training/6150a2bd_solutions.pdf]

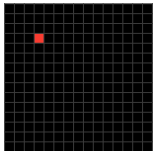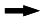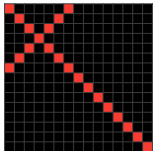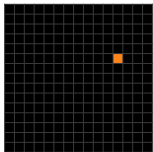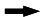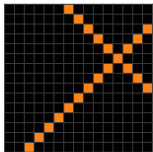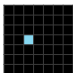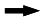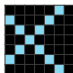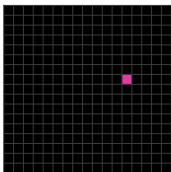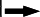

?

Supplement: supplementary_material [file 623ea044_problem.pdf › CompressARC/results_for_the_blog_post/plots_training/623ea044_problem.pdf]

sample

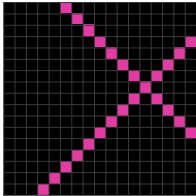

sample average

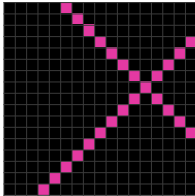

guess 1

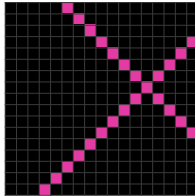

guess 2

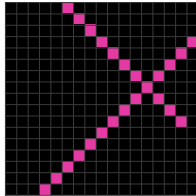

Supplement: supplementary_material [file 623ea044_solutions.pdf › CompressARC/results_for_the_blog_post/plots_training/623ea044_solutions.pdf]

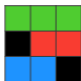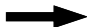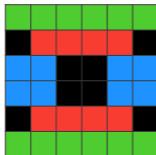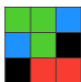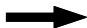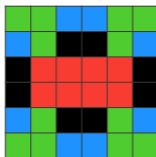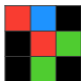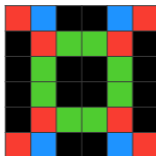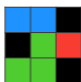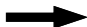

?

Supplement: supplementary_material [file 62c24649_problem.pdf › CompressARC/results_for_the_blog_post/plots_training/62c24649_problem.pdf]

sample

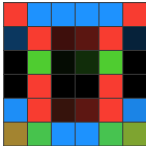

sample average

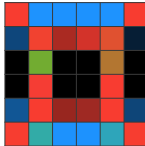

guess 1

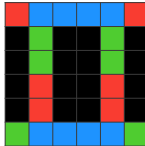

guess 2

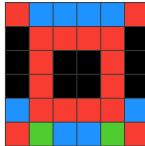

Supplement: supplementary_material [file 62c24649_solutions.pdf › CompressARC/results_for_the_blog_post/plots_training/62c24649_solutions.pdf]

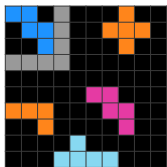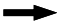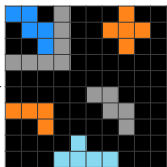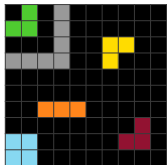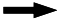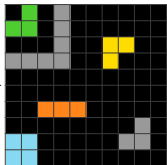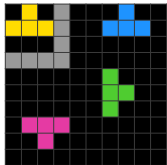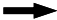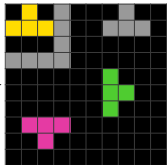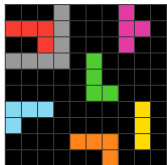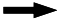

?

Supplement: supplementary_material [file 63613498_problem.pdf › CompressARC/results_for_the_blog_post/plots_training/63613498_problem.pdf]

sample

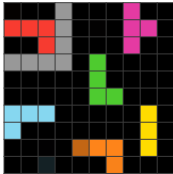

sample average

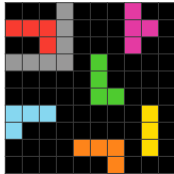

guess 1

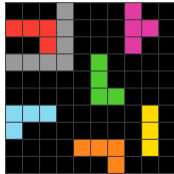

guess 2

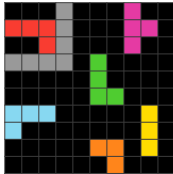

Supplement: supplementary_material [file 63613498_solutions.pdf › CompressARC/results_for_the_blog_post/plots_training/63613498_solutions.pdf]

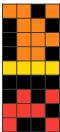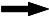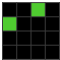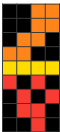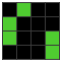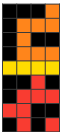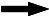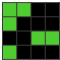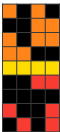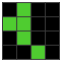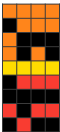

?

Supplement: supplementary_material [file 6430c8c4_problem.pdf › CompressARC/results_for_the_blog_post/plots_training/6430c8c4_problem.pdf]

sample

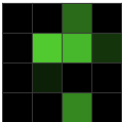

sample average

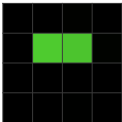

guess 1

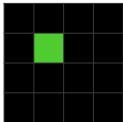

guess 2

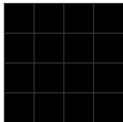

Supplement: supplementary_material [file 6430c8c4_solutions.pdf › CompressARC/results_for_the_blog_post/plots_training/6430c8c4_solutions.pdf]

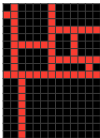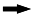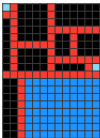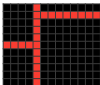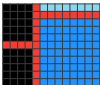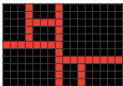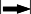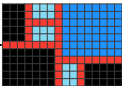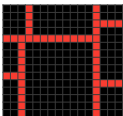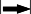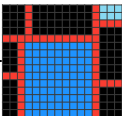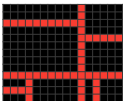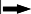

?

Supplement: supplementary_material [file 6455b5f5_problem.pdf › CompressARC/results_for_the_blog_post/plots_training/6455b5f5_problem.pdf]

sample

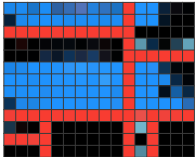

sample average

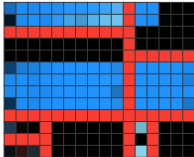

guess 1

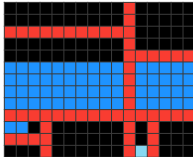

guess 2

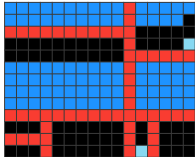

Supplement: supplementary_material [file 6455b5f5_solutions.pdf › CompressARC/results_for_the_blog_post/plots_training/6455b5f5_solutions.pdf]

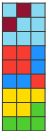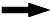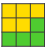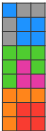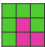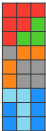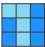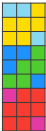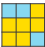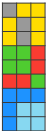

?

Supplement: supplementary_material [file 662c240a_problem.pdf › CompressARC/results_for_the_blog_post/plots_training/662c240a_problem.pdf]

sample

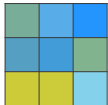

sample average

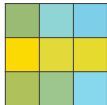

guess 1

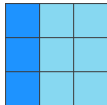

guess 2

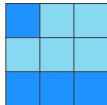

Supplement: supplementary_material [file 662c240a_solutions.pdf › CompressARC/results_for_the_blog_post/plots_training/662c240a_solutions.pdf]

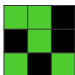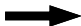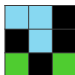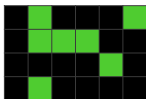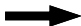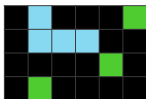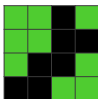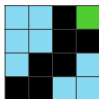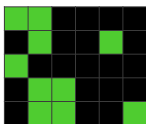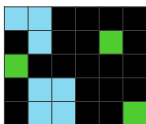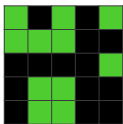

?

Supplement: supplementary_material [file 67385a82_problem.pdf › CompressARC/results_for_the_blog_post/plots_training/67385a82_problem.pdf]

sample

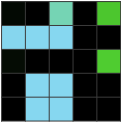

sample average

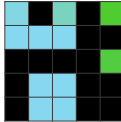

guess 1

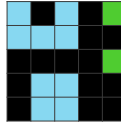

guess 2

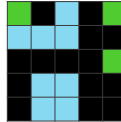

Supplement: supplementary_material [file 67385a82_solutions.pdf › CompressARC/results_for_the_blog_post/plots_training/67385a82_solutions.pdf]

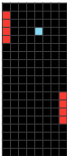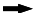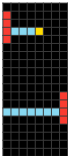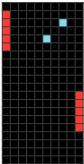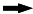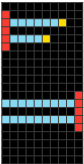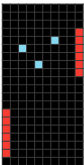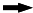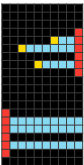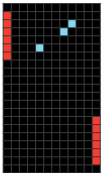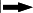

?

Supplement: supplementary_material [file 673ef223_problem.pdf › CompressARC/results_for_the_blog_post/plots_training/673ef223_problem.pdf]

sample

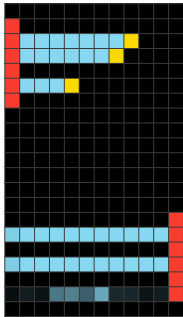

sample average

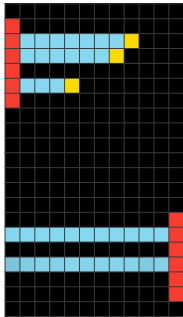

guess 1

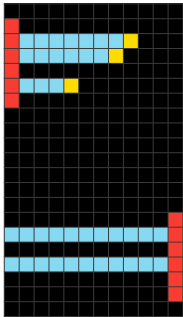

guess 2

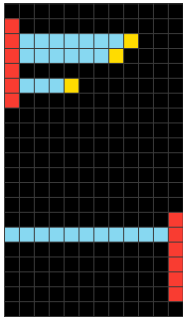

Supplement: supplementary_material [file 673ef223_solutions.pdf › CompressARC/results_for_the_blog_post/plots_training/673ef223_solutions.pdf]

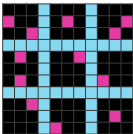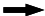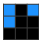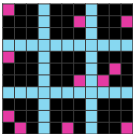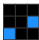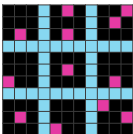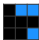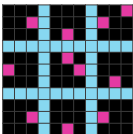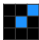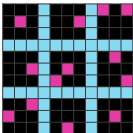

?

Supplement: supplementary_material [file 6773b310_problem.pdf › CompressARC/results_for_the_blog_post/plots_training/6773b310_problem.pdf]
