# Supplementary material (part 13 of 17)
Source: ML conference proceedings conference paper supplement (https://openreview.net/forum?id=jLC662Yo5h)

sample

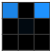

sample average

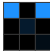

guess 1

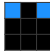

guess 2

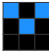

Supplement: supplementary_material [file 6773b310_solutions.pdf › CompressARC/results_for_the_blog_post/plots_training/6773b310_solutions.pdf]

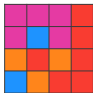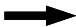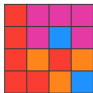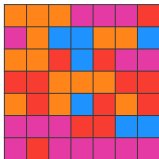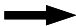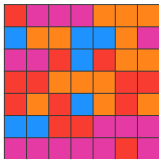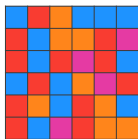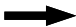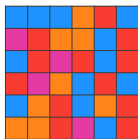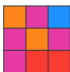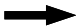

?

Supplement: supplementary_material [file 67a3c6ac_problem.pdf › CompressARC/results_for_the_blog_post/plots_training/67a3c6ac_problem.pdf]

sample

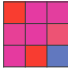

sample average

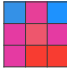

guess 1

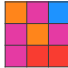

guess 2

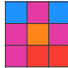

Supplement: supplementary_material [file 67a3c6ac_solutions.pdf › CompressARC/results_for_the_blog_post/plots_training/67a3c6ac_solutions.pdf]

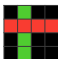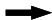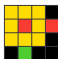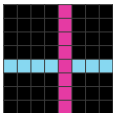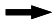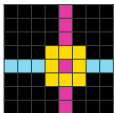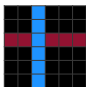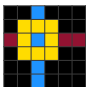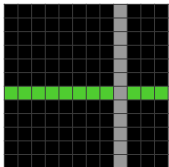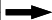

?

Supplement: supplementary_material [file 67a423a3_problem.pdf › CompressARC/results_for_the_blog_post/plots_training/67a423a3_problem.pdf]

sample

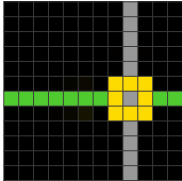

sample average

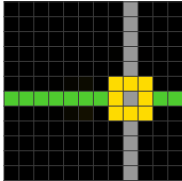

guess 1

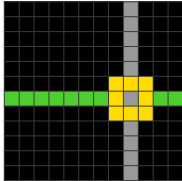

guess 2

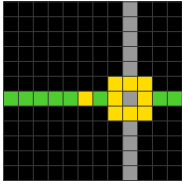

Supplement: supplementary_material [file 67a423a3_solutions.pdf › CompressARC/results_for_the_blog_post/plots_training/67a423a3_solutions.pdf]

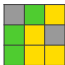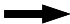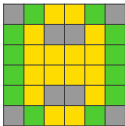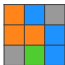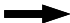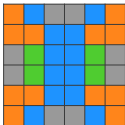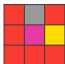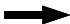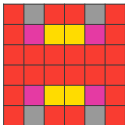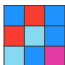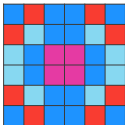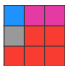

?

Supplement: supplementary_material [file 67e8384a_problem.pdf › CompressARC/results_for_the_blog_post/plots_training/67e8384a_problem.pdf]

sample

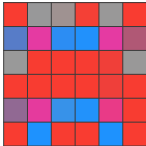

sample average

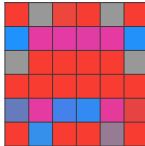

guess 1

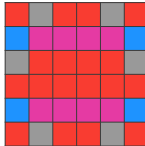

guess 2

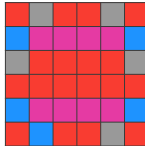

Supplement: supplementary_material [file 67e8384a_solutions.pdf › CompressARC/results_for_the_blog_post/plots_training/67e8384a_solutions.pdf]

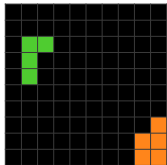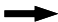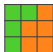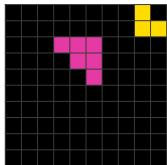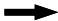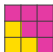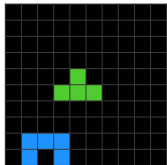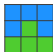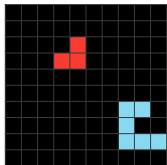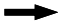

?

Supplement: supplementary_material [file 681b3aeb_problem.pdf › CompressARC/results_for_the_blog_post/plots_training/681b3aeb_problem.pdf]

sample

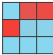

sample average

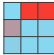

guess 1

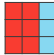

guess 2

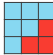

Supplement: supplementary_material [file 681b3aeb_solutions.pdf › CompressARC/results_for_the_blog_post/plots_training/681b3aeb_solutions.pdf]

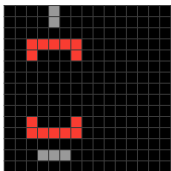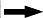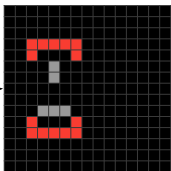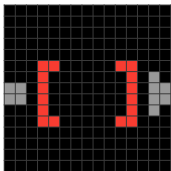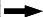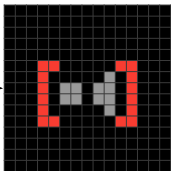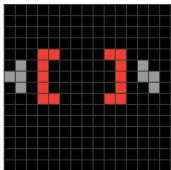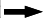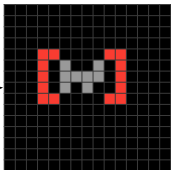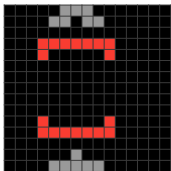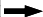

?

Supplement: supplementary_material [file 6855a6e4_problem.pdf › CompressARC/results_for_the_blog_post/plots_training/6855a6e4_problem.pdf]

sample

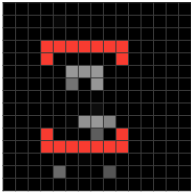

sample average

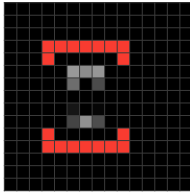

guess 1

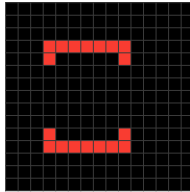

guess 2

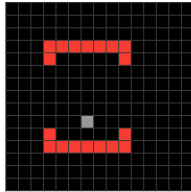

Supplement: supplementary_material [file 6855a6e4_solutions.pdf › CompressARC/results_for_the_blog_post/plots_training/6855a6e4_solutions.pdf]

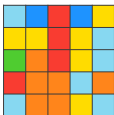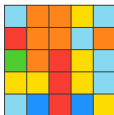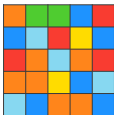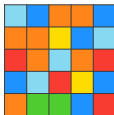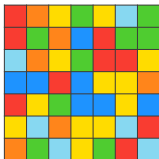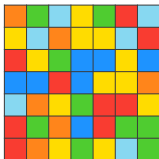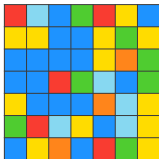

?

Supplement: supplementary_material [file 68b16354_problem.pdf › CompressARC/results_for_the_blog_post/plots_training/68b16354_problem.pdf]

sample

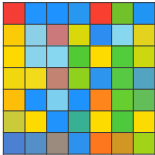

sample average

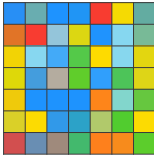

guess 1

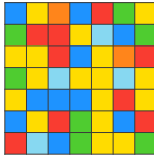

guess 2

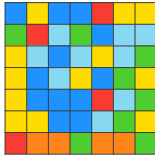

Supplement: supplementary_material [file 68b16354_solutions.pdf › CompressARC/results_for_the_blog_post/plots_training/68b16354_solutions.pdf]

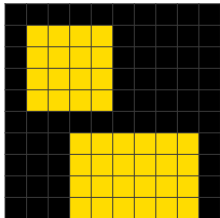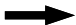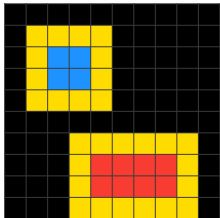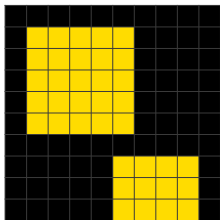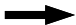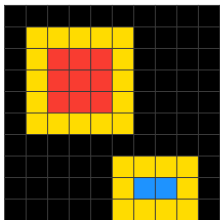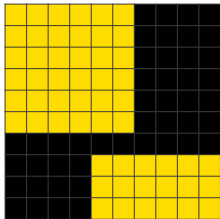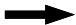

?

Supplement: supplementary_material [file 694f12f3_problem.pdf › CompressARC/results_for_the_blog_post/plots_training/694f12f3_problem.pdf]

sample

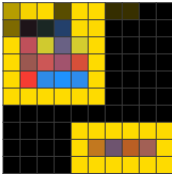

sample average

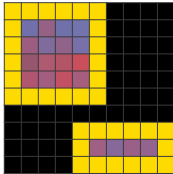

guess 1

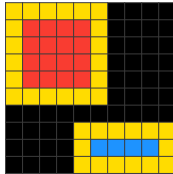

guess 2

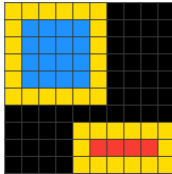

Supplement: supplementary_material [file 694f12f3_solutions.pdf › CompressARC/results_for_the_blog_post/plots_training/694f12f3_solutions.pdf]

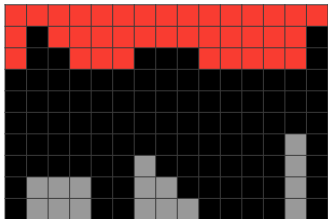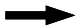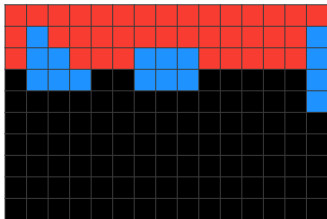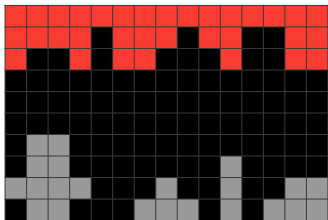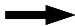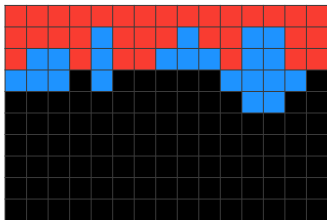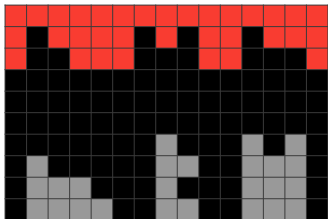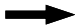

?

Supplement: supplementary_material [file 6a1e5592_problem.pdf › CompressARC/results_for_the_blog_post/plots_training/6a1e5592_problem.pdf]

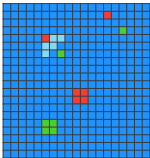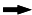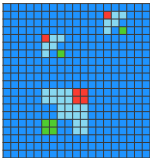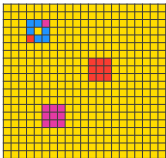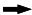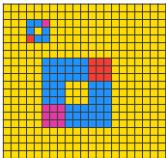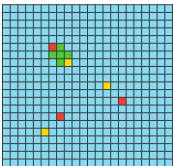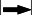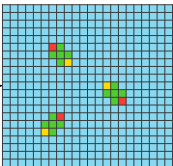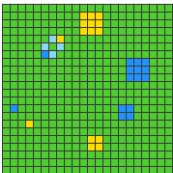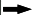

?

Supplement: supplementary_material [file 6aa20dc0_problem.pdf › CompressARC/results_for_the_blog_post/plots_training/6aa20dc0_problem.pdf]

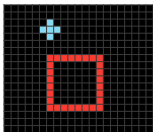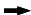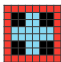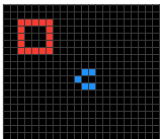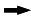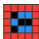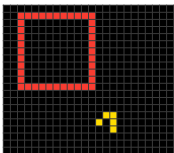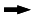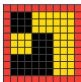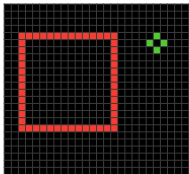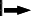

?

Supplement: supplementary_material [file 6b9890af_problem.pdf › CompressARC/results_for_the_blog_post/plots_training/6b9890af_problem.pdf]

sample

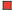

sample average

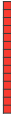

guess 1

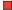

guess 2

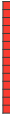

Supplement: supplementary_material [file 6b9890af_solutions.pdf › CompressARC/results_for_the_blog_post/plots_training/6b9890af_solutions.pdf]

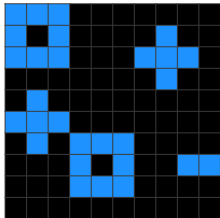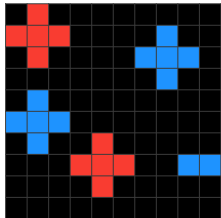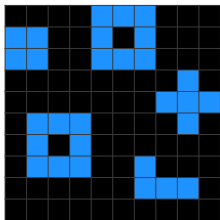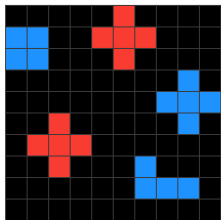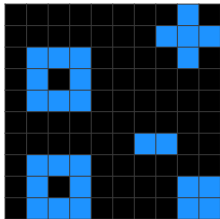

?

Supplement: supplementary_material [file 6c434453_problem.pdf › CompressARC/results_for_the_blog_post/plots_training/6c434453_problem.pdf]

sample

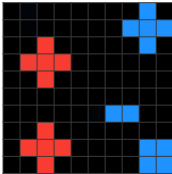

sample average

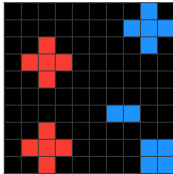

guess 1

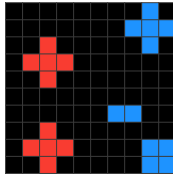

guess 2

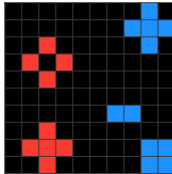

Supplement: supplementary_material [file 6c434453_solutions.pdf › CompressARC/results_for_the_blog_post/plots_training/6c434453_solutions.pdf]

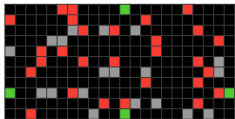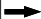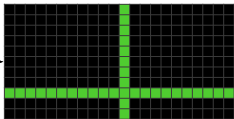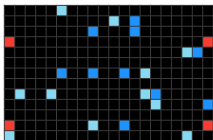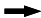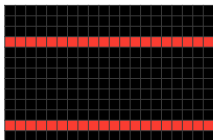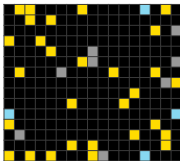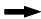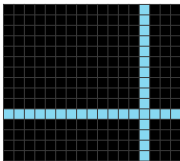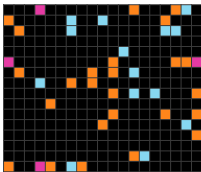

?

Supplement: supplementary_material [file 6cdd2623_problem.pdf › CompressARC/results_for_the_blog_post/plots_training/6cdd2623_problem.pdf]

sample

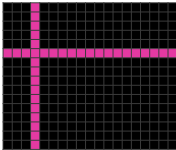

sample average

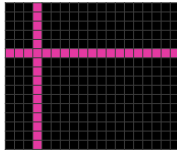

guess 1

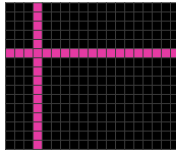

guess 2

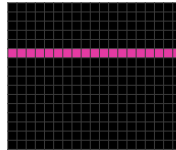

Supplement: supplementary_material [file 6cdd2623_solutions.pdf › CompressARC/results_for_the_blog_post/plots_training/6cdd2623_solutions.pdf]

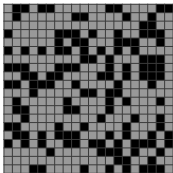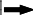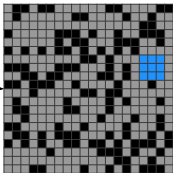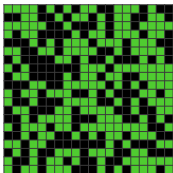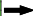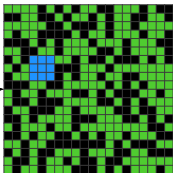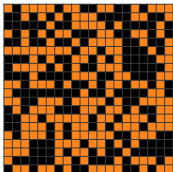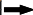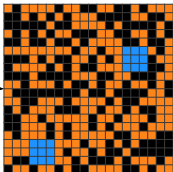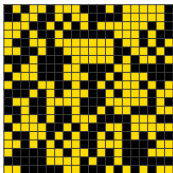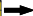

?

Supplement: supplementary_material [file 6cf79266_problem.pdf › CompressARC/results_for_the_blog_post/plots_training/6cf79266_problem.pdf]

sample

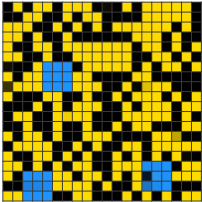

sample average

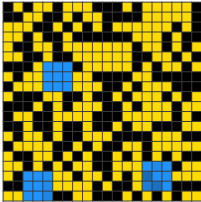

guess 1

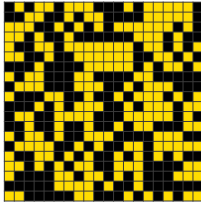

guess 2

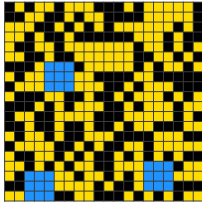

Supplement: supplementary_material [file 6cf79266_solutions.pdf › CompressARC/results_for_the_blog_post/plots_training/6cf79266_solutions.pdf]

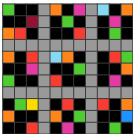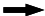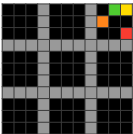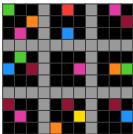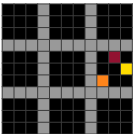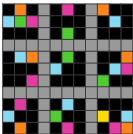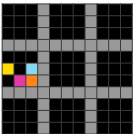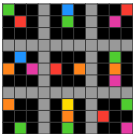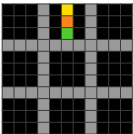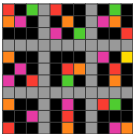

?

Supplement: supplementary_material [file 6d0160f0_problem.pdf › CompressARC/results_for_the_blog_post/plots_training/6d0160f0_problem.pdf]

sample

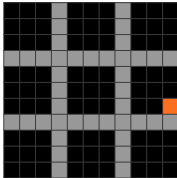

sample average

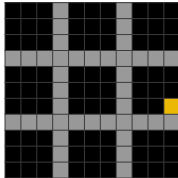

guess 1

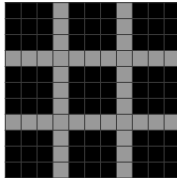

guess 2

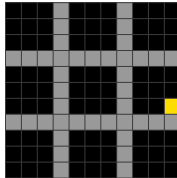

Supplement: supplementary_material [file 6d0160f0_solutions.pdf › CompressARC/results_for_the_blog_post/plots_training/6d0160f0_solutions.pdf]

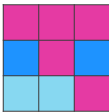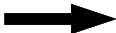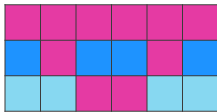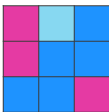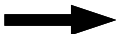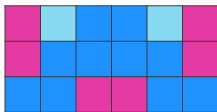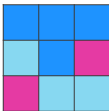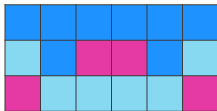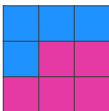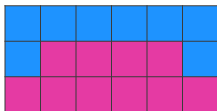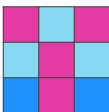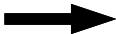

?

Supplement: supplementary_material [file 6d0aefbc_problem.pdf › CompressARC/results_for_the_blog_post/plots_training/6d0aefbc_problem.pdf]

sample

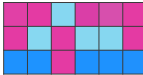

sample average

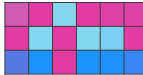

guess 1

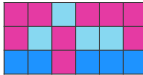

guess 2

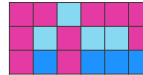

Supplement: supplementary_material [file 6d0aefbc_solutions.pdf › CompressARC/results_for_the_blog_post/plots_training/6d0aefbc_solutions.pdf]

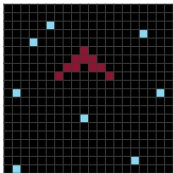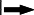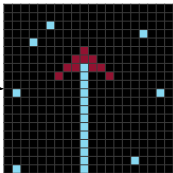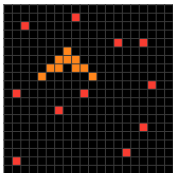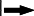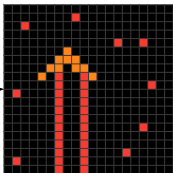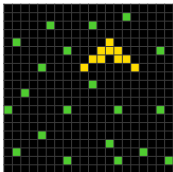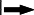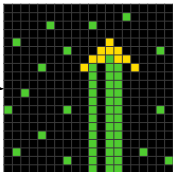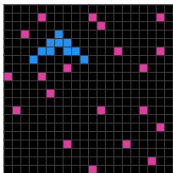

?

Supplement: supplementary_material [file 6d58a25d_problem.pdf › CompressARC/results_for_the_blog_post/plots_training/6d58a25d_problem.pdf]

sample

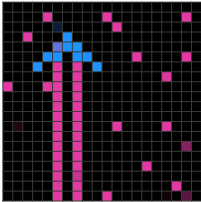

sample average

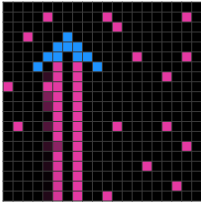

guess 1

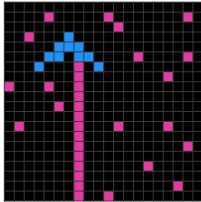

guess 2

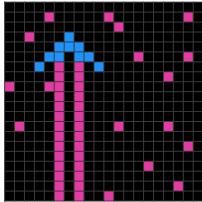

Supplement: supplementary_material [file 6d58a25d_solutions.pdf › CompressARC/results_for_the_blog_post/plots_training/6d58a25d_solutions.pdf]

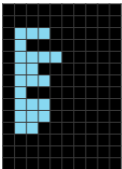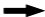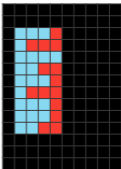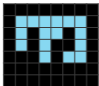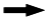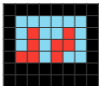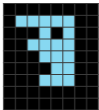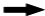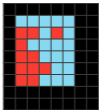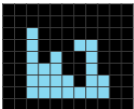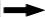

?

Supplement: supplementary_material [file 6d75e8bb_problem.pdf › CompressARC/results_for_the_blog_post/plots_training/6d75e8bb_problem.pdf]

sample

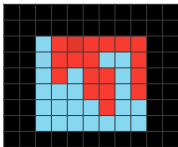

sample average

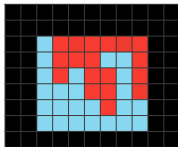

guess 1

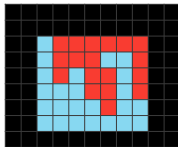

guess 2

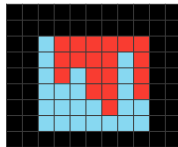

Supplement: supplementary_material [file 6d75e8bb_solutions.pdf › CompressARC/results_for_the_blog_post/plots_training/6d75e8bb_solutions.pdf]

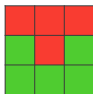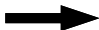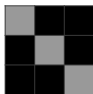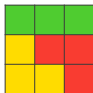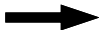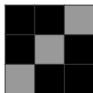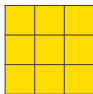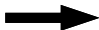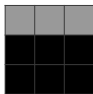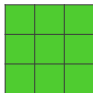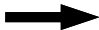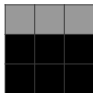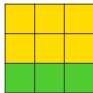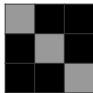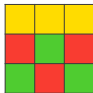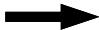

?

Supplement: supplementary_material [file 6e02f1e3_problem.pdf › CompressARC/results_for_the_blog_post/plots_training/6e02f1e3_problem.pdf]

sample

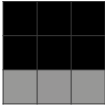

sample average

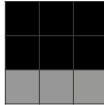

guess 1

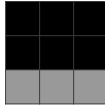

guess 2

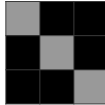

Supplement: supplementary_material [file 6e02f1e3_solutions.pdf › CompressARC/results_for_the_blog_post/plots_training/6e02f1e3_solutions.pdf]

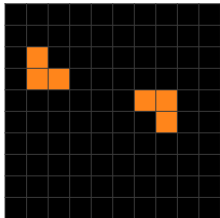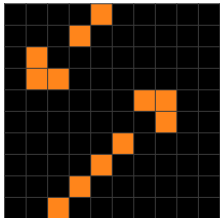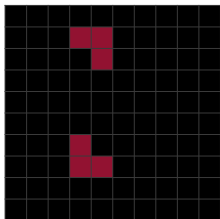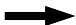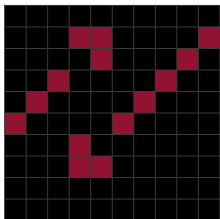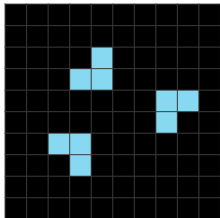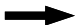

?

Supplement: supplementary_material [file 6e19193c_problem.pdf › CompressARC/results_for_the_blog_post/plots_training/6e19193c_problem.pdf]

sample

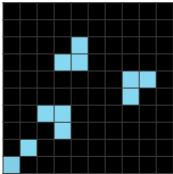

sample average

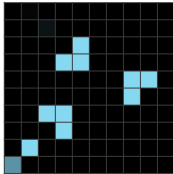

guess 1

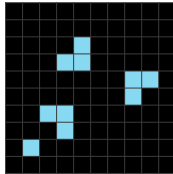

guess 2

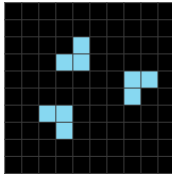

Supplement: supplementary_material [file 6e19193c_solutions.pdf › CompressARC/results_for_the_blog_post/plots_training/6e19193c_solutions.pdf]

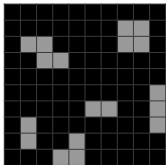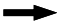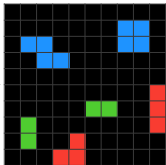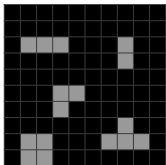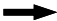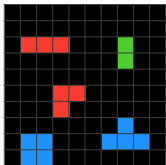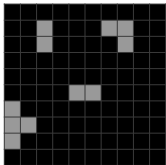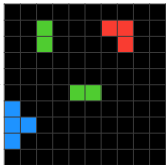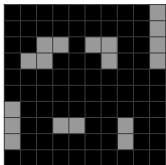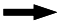

?

Supplement: supplementary_material [file 6e82a1ae_problem.pdf › CompressARC/results_for_the_blog_post/plots_training/6e82a1ae_problem.pdf]

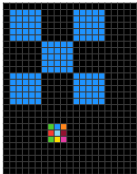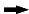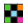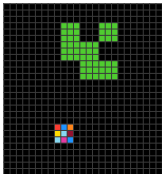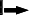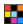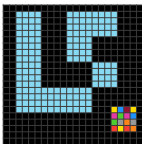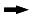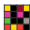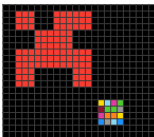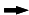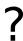

Supplement: supplementary_material [file 6ecd11f4_problem.pdf › CompressARC/results_for_the_blog_post/plots_training/6ecd11f4_problem.pdf]

sample

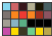

sample average

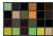

guess 1

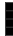

guess 2

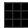

Supplement: supplementary_material [file 6ecd11f4_solutions.pdf › CompressARC/results_for_the_blog_post/plots_training/6ecd11f4_solutions.pdf]

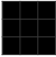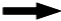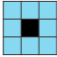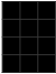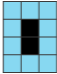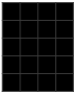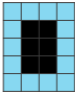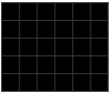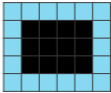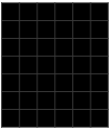

?

Supplement: supplementary_material [file 6f8cd79b_problem.pdf › CompressARC/results_for_the_blog_post/plots_training/6f8cd79b_problem.pdf]

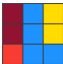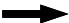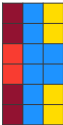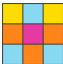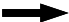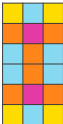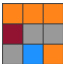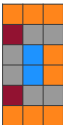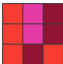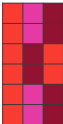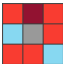

?

Supplement: supplementary_material [file 6fa7a44f_problem.pdf › CompressARC/results_for_the_blog_post/plots_training/6fa7a44f_problem.pdf]

sample

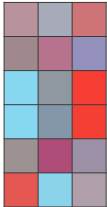

sample average

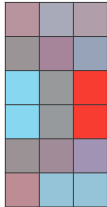

guess 1

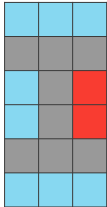

guess 2

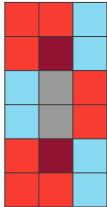

Supplement: supplementary_material [file 6fa7a44f_solutions.pdf › CompressARC/results_for_the_blog_post/plots_training/6fa7a44f_solutions.pdf]

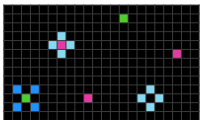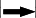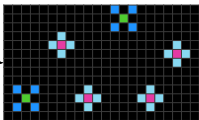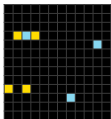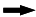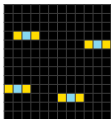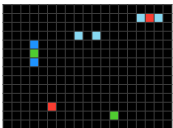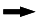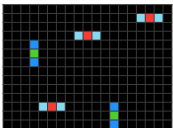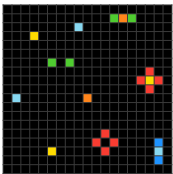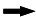

?

Supplement: supplementary_material [file 72322fa7_problem.pdf › CompressARC/results_for_the_blog_post/plots_training/72322fa7_problem.pdf]

sample

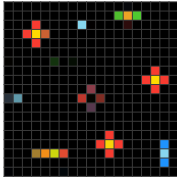

sample average

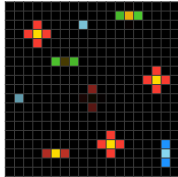

guess 1

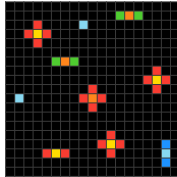

guess 2

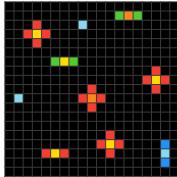

Supplement: supplementary_material [file 72322fa7_solutions.pdf › CompressARC/results_for_the_blog_post/plots_training/72322fa7_solutions.pdf]

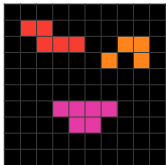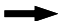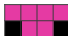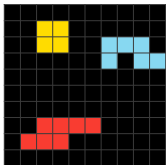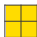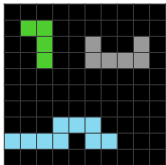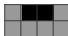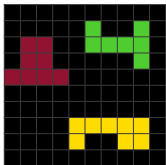

?

Supplement: supplementary_material [file 72ca375d_problem.pdf › CompressARC/results_for_the_blog_post/plots_training/72ca375d_problem.pdf]

sample

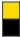

sample average

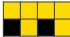

guess 1

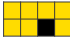

guess 2

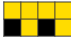

Supplement: supplementary_material [file 72ca375d_solutions.pdf › CompressARC/results_for_the_blog_post/plots_training/72ca375d_solutions.pdf]

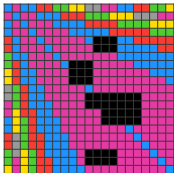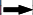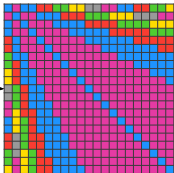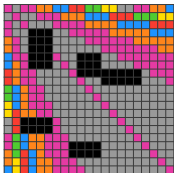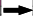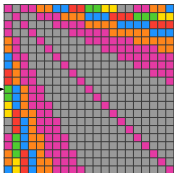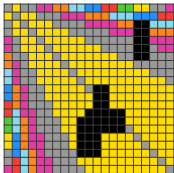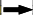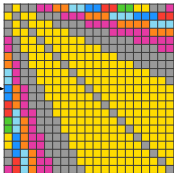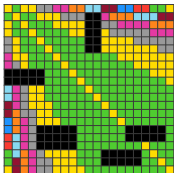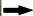

?

Supplement: supplementary_material [file 73251a56_problem.pdf › CompressARC/results_for_the_blog_post/plots_training/73251a56_problem.pdf]

sample

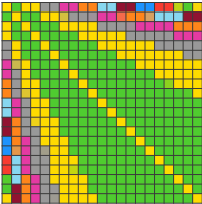

sample average

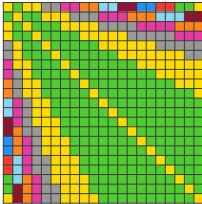

guess 1

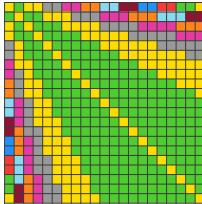

guess 2

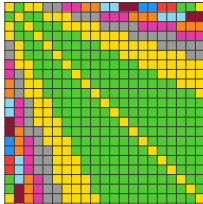

Supplement: supplementary_material [file 73251a56_solutions.pdf › CompressARC/results_for_the_blog_post/plots_training/73251a56_solutions.pdf]

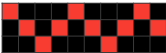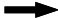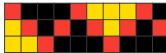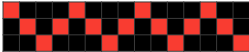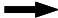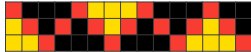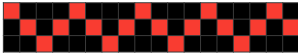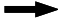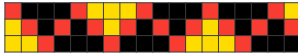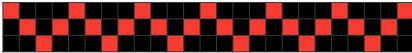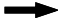

?

Supplement: supplementary_material [file 7447852a_problem.pdf › CompressARC/results_for_the_blog_post/plots_training/7447852a_problem.pdf]

sample

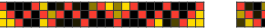

sample average

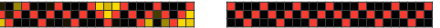

guess 1

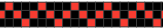

guess 2

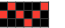

Supplement: supplementary_material [file 7447852a_solutions.pdf › CompressARC/results_for_the_blog_post/plots_training/7447852a_solutions.pdf]

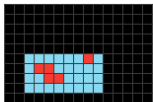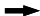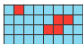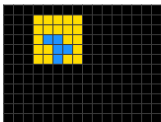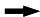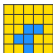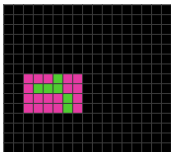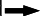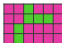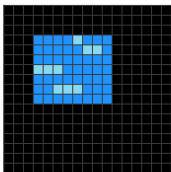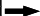

?

Supplement: supplementary_material [file 7468f01a_problem.pdf › CompressARC/results_for_the_blog_post/plots_training/7468f01a_problem.pdf]

sample

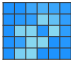

sample average

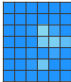

guess 1

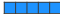

guess 2

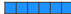

Supplement: supplementary_material [file 7468f01a_solutions.pdf › CompressARC/results_for_the_blog_post/plots_training/7468f01a_solutions.pdf]

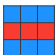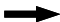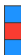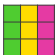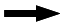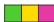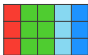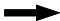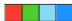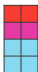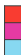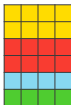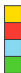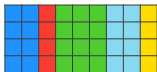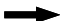

?

Supplement: supplementary_material [file 746b3537_problem.pdf › CompressARC/results_for_the_blog_post/plots_training/746b3537_problem.pdf]

sample

sample average

guess 1

guess 2

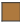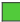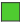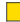

Supplement: supplementary_material [file 746b3537_solutions.pdf › CompressARC/results_for_the_blog_post/plots_training/746b3537_solutions.pdf]

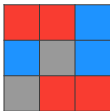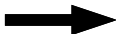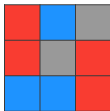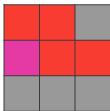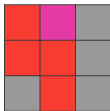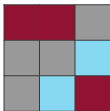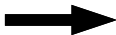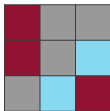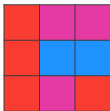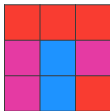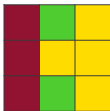

?

Supplement: supplementary_material [file 74dd1130_problem.pdf › CompressARC/results_for_the_blog_post/plots_training/74dd1130_problem.pdf]

sample

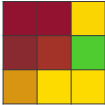

sample average

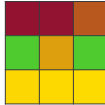

guess 1

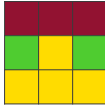

guess 2

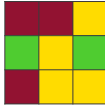

Supplement: supplementary_material [file 74dd1130_solutions.pdf › CompressARC/results_for_the_blog_post/plots_training/74dd1130_solutions.pdf]

sample

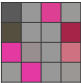

sample average

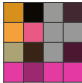

guess 1

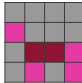

guess 2

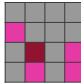

Supplement: supplementary_material [file 75b8110e_solutions.pdf › CompressARC/results_for_the_blog_post/plots_training/75b8110e_solutions.pdf]

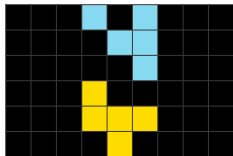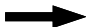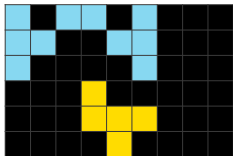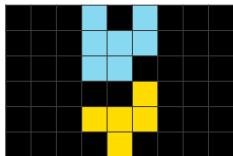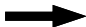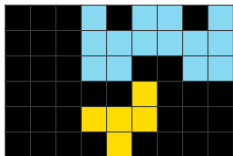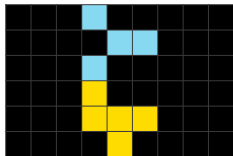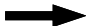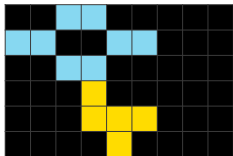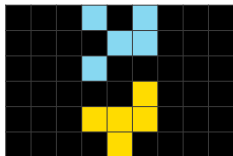

?

Supplement: supplementary_material [file 760b3cac_problem.pdf › CompressARC/results_for_the_blog_post/plots_training/760b3cac_problem.pdf]

sample

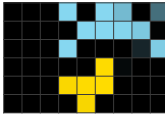

sample average

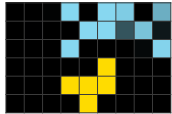

guess 1

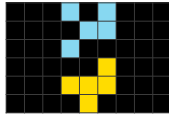

guess 2

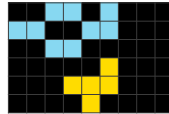

Supplement: supplementary_material [file 760b3cac_solutions.pdf › CompressARC/results_for_the_blog_post/plots_training/760b3cac_solutions.pdf]

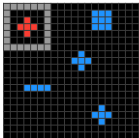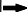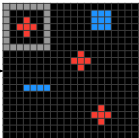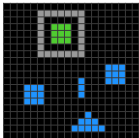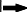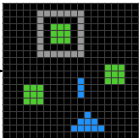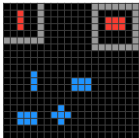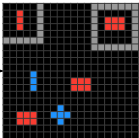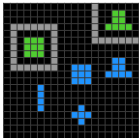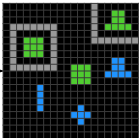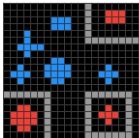

?

Supplement: supplementary_material [file 776ffc46_problem.pdf › CompressARC/results_for_the_blog_post/plots_training/776ffc46_problem.pdf]

sample

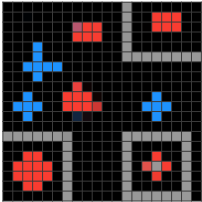

sample average

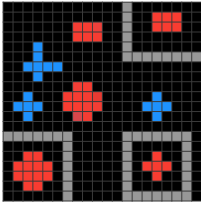

guess 1

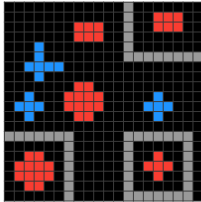

guess 2

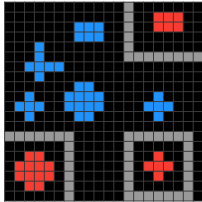

Supplement: supplementary_material [file 776ffc46_solutions.pdf › CompressARC/results_for_the_blog_post/plots_training/776ffc46_solutions.pdf]

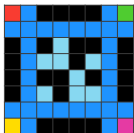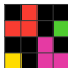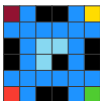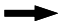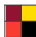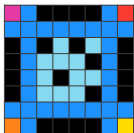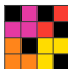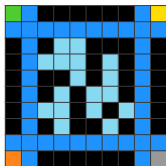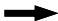

?

Supplement: supplementary_material [file 77fdfe62_problem.pdf › CompressARC/results_for_the_blog_post/plots_training/77fdfe62_problem.pdf]

sample

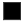

sample average

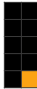

guess 1

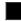

guess 2

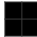

Supplement: supplementary_material [file 77fdfe62_solutions.pdf › CompressARC/results_for_the_blog_post/plots_training/77fdfe62_solutions.pdf]

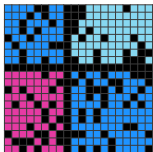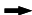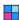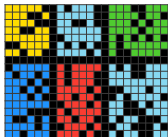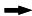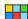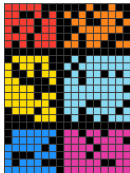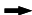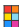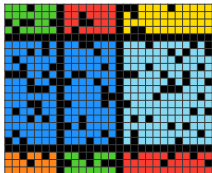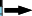

?

Supplement: supplementary_material [file 780d0b14_problem.pdf › CompressARC/results_for_the_blog_post/plots_training/780d0b14_problem.pdf]

sample

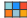

sample average

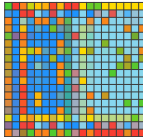

guess 1

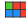

guess 2

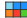

Supplement: supplementary_material [file 780d0b14_solutions.pdf › CompressARC/results_for_the_blog_post/plots_training/780d0b14_solutions.pdf]

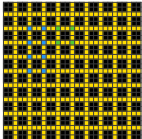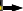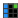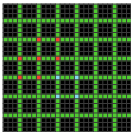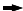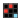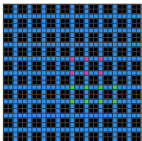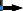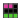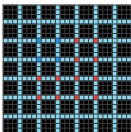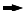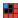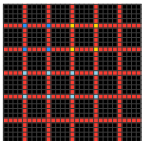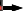

?

Supplement: supplementary_material [file 7837ac64_problem.pdf › CompressARC/results_for_the_blog_post/plots_training/7837ac64_problem.pdf]

sample

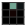

sample average

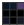

guess 1

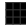

guess 2

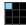

Supplement: supplementary_material [file 7837ac64_solutions.pdf › CompressARC/results_for_the_blog_post/plots_training/7837ac64_solutions.pdf]

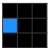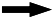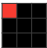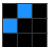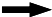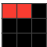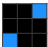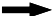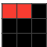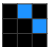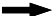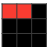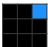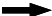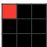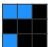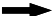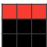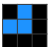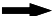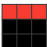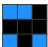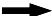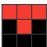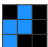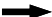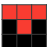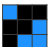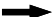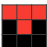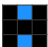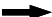

?

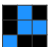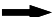

?

Supplement: supplementary_material [file 794b24be_problem.pdf › CompressARC/results_for_the_blog_post/plots_training/794b24be_problem.pdf]

sample

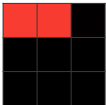

sample average

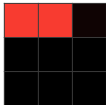

guess 1

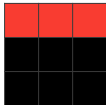

guess 2

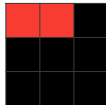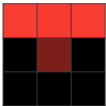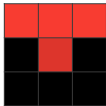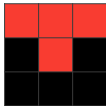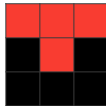

Supplement: supplementary_material [file 794b24be_solutions.pdf › CompressARC/results_for_the_blog_post/plots_training/794b24be_solutions.pdf]

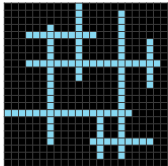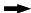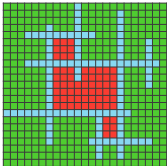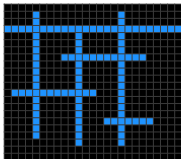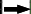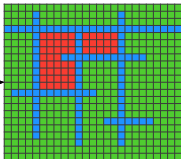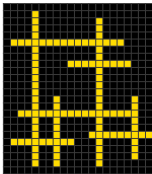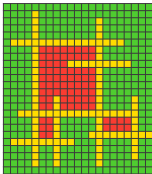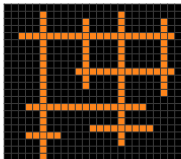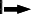

?

Supplement: supplementary_material [file 7b6016b9_problem.pdf › CompressARC/results_for_the_blog_post/plots_training/7b6016b9_problem.pdf]

sample

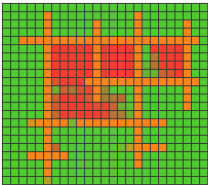

sample average

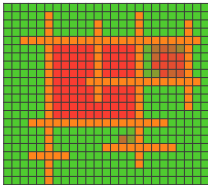

guess 1

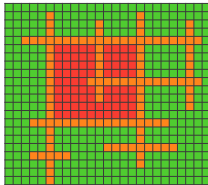

guess 2

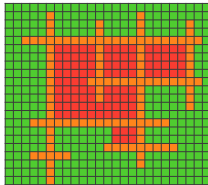

Supplement: supplementary_material [file 7b6016b9_solutions.pdf › CompressARC/results_for_the_blog_post/plots_training/7b6016b9_solutions.pdf]

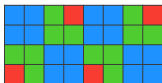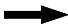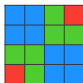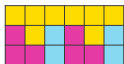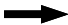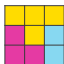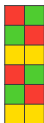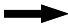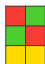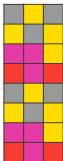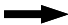

?

Supplement: supplementary_material [file 7b7f7511_problem.pdf › CompressARC/results_for_the_blog_post/plots_training/7b7f7511_problem.pdf]

sample

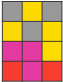

sample average

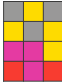

guess 1

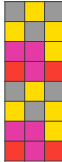

guess 2

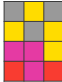

Supplement: supplementary_material [file 7b7f7511_solutions.pdf › CompressARC/results_for_the_blog_post/plots_training/7b7f7511_solutions.pdf]

sample

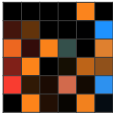

sample average

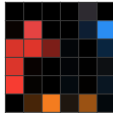

guess 1

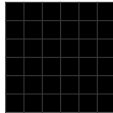

guess 2

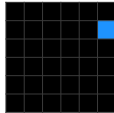

Supplement: supplementary_material [file 7c008303_solutions.pdf › CompressARC/results_for_the_blog_post/plots_training/7c008303_solutions.pdf]

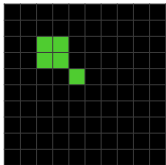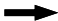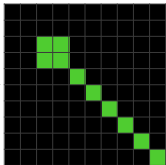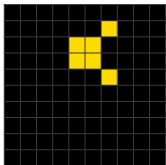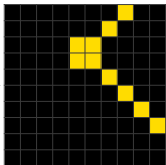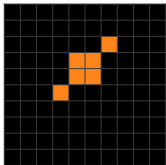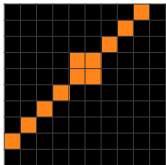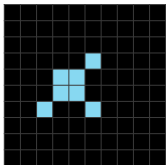

?

Supplement: supplementary_material [file 7ddcd7ec_problem.pdf › CompressARC/results_for_the_blog_post/plots_training/7ddcd7ec_problem.pdf]

sample

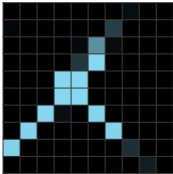

sample average

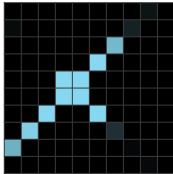

guess 1

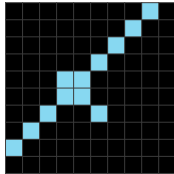

guess 2

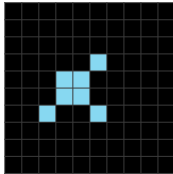

Supplement: supplementary_material [file 7ddcd7ec_solutions.pdf › CompressARC/results_for_the_blog_post/plots_training/7ddcd7ec_solutions.pdf]

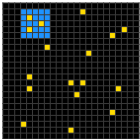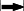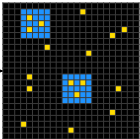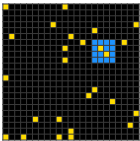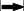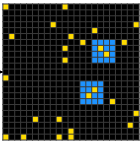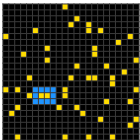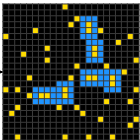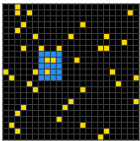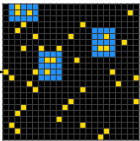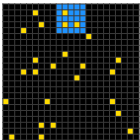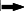

?

Supplement: supplementary_material [file 7df24a62_problem.pdf › CompressARC/results_for_the_blog_post/plots_training/7df24a62_problem.pdf]

sample

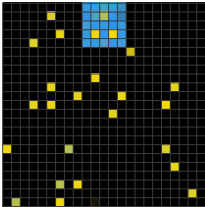

sample average

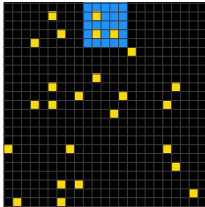

guess 1

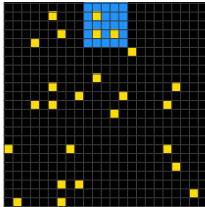

guess 2

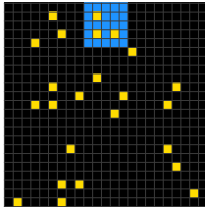

Supplement: supplementary_material [file 7df24a62_solutions.pdf › CompressARC/results_for_the_blog_post/plots_training/7df24a62_solutions.pdf]

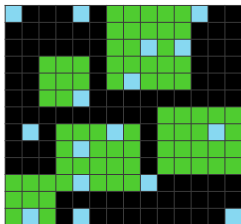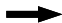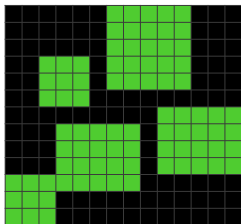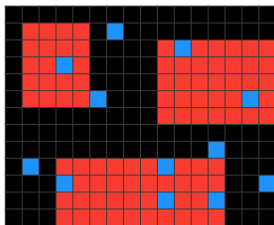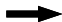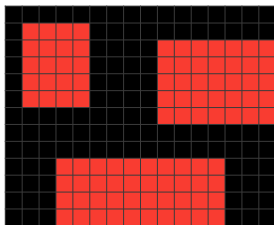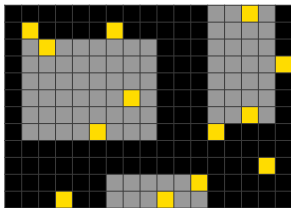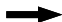

?

Supplement: supplementary_material [file 7e0986d6_problem.pdf › CompressARC/results_for_the_blog_post/plots_training/7e0986d6_problem.pdf]

sample

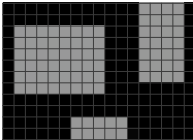

sample average

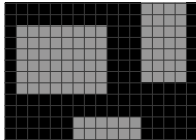

guess 1

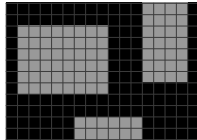

guess 2

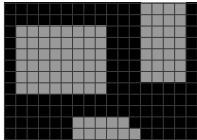

Supplement: supplementary_material [file 7e0986d6_solutions.pdf › CompressARC/results_for_the_blog_post/plots_training/7e0986d6_solutions.pdf]

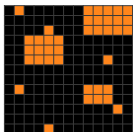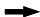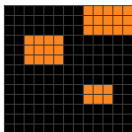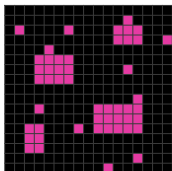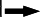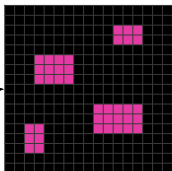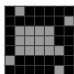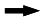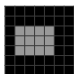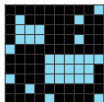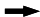

?

Supplement: supplementary_material [file 7f4411dc_problem.pdf › CompressARC/results_for_the_blog_post/plots_training/7f4411dc_problem.pdf]

sample

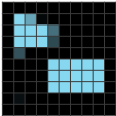

sample average

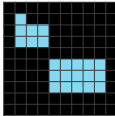

guess 1

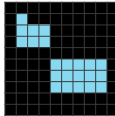

guess 2

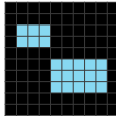

Supplement: supplementary_material [file 7f4411dc_solutions.pdf › CompressARC/results_for_the_blog_post/plots_training/7f4411dc_solutions.pdf]

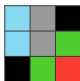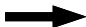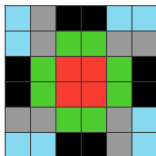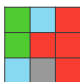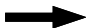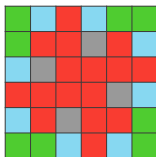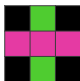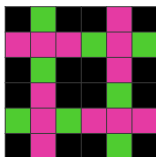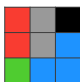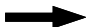

?

Supplement: supplementary_material [file 7fe24cdd_problem.pdf › CompressARC/results_for_the_blog_post/plots_training/7fe24cdd_problem.pdf]

sample

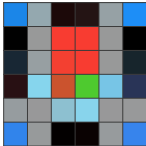

sample average

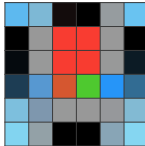

guess 1

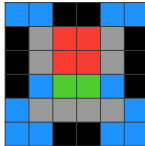

guess 2

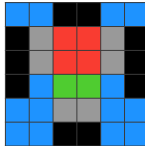

Supplement: supplementary_material [file 7fe24cdd_solutions.pdf › CompressARC/results_for_the_blog_post/plots_training/7fe24cdd_solutions.pdf]

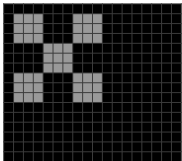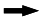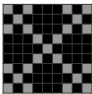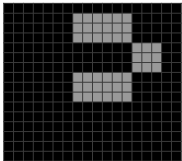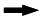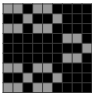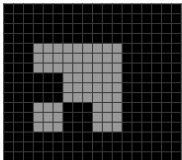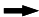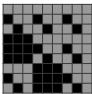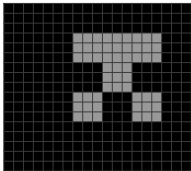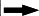

?

Supplement: supplementary_material [file 80af3007_problem.pdf › CompressARC/results_for_the_blog_post/plots_training/80af3007_problem.pdf]

sample

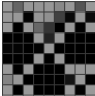

sample average

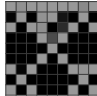

guess 1

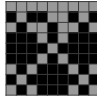

guess 2

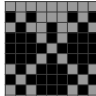

Supplement: supplementary_material [file 80af3007_solutions.pdf › CompressARC/results_for_the_blog_post/plots_training/80af3007_solutions.pdf]

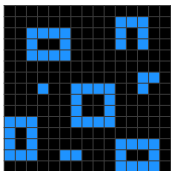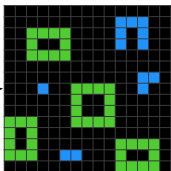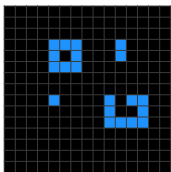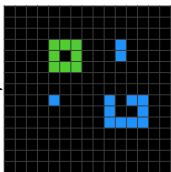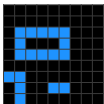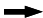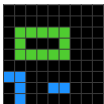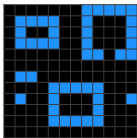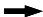

?

Supplement: supplementary_material [file 810b9b61_problem.pdf › CompressARC/results_for_the_blog_post/plots_training/810b9b61_problem.pdf]

sample

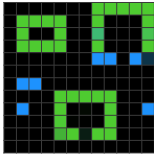

sample average

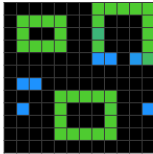

guess 1

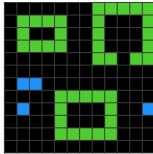

guess 2

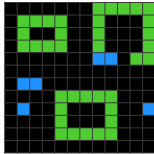

Supplement: supplementary_material [file 810b9b61_solutions.pdf › CompressARC/results_for_the_blog_post/plots_training/810b9b61_solutions.pdf]

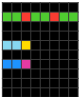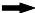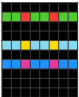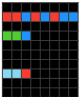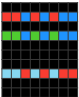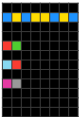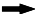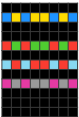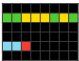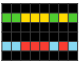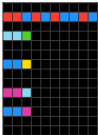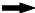

?

Supplement: supplementary_material [file 82819916_problem.pdf › CompressARC/results_for_the_blog_post/plots_training/82819916_problem.pdf]

sample

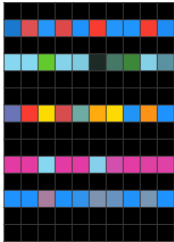

sample average

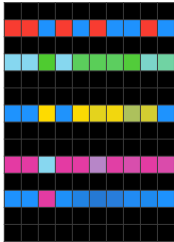

guess 1

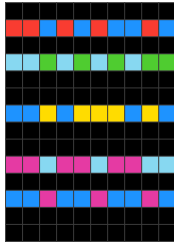

guess 2

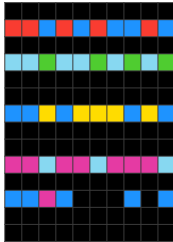

Supplement: supplementary_material [file 82819916_solutions.pdf › CompressARC/results_for_the_blog_post/plots_training/82819916_solutions.pdf]

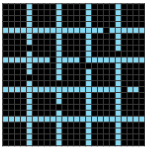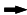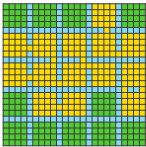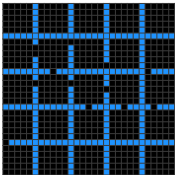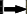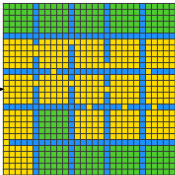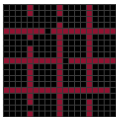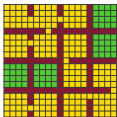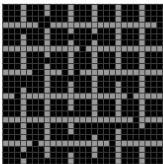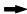

?

Supplement: supplementary_material [file 83302e8f_problem.pdf › CompressARC/results_for_the_blog_post/plots_training/83302e8f_problem.pdf]

sample

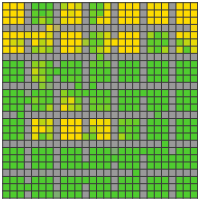

sample average

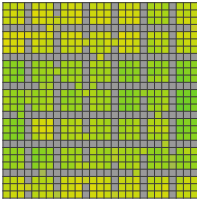

guess 1

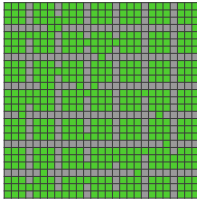

guess 2

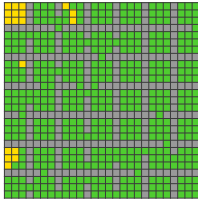

Supplement: supplementary_material [file 83302e8f_solutions.pdf › CompressARC/results_for_the_blog_post/plots_training/83302e8f_solutions.pdf]

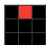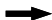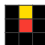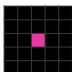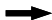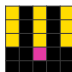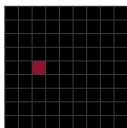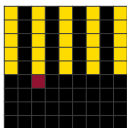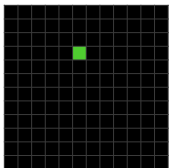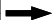

?

Supplement: supplementary_material [file 834ec97d_problem.pdf › CompressARC/results_for_the_blog_post/plots_training/834ec97d_problem.pdf]

sample

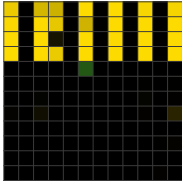

sample average

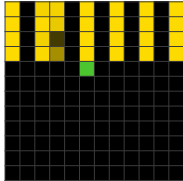

guess 1

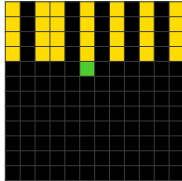

guess 2

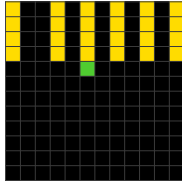

Supplement: supplementary_material [file 834ec97d_solutions.pdf › CompressARC/results_for_the_blog_post/plots_training/834ec97d_solutions.pdf]

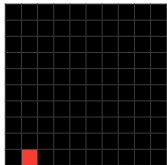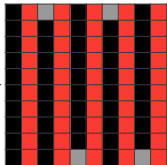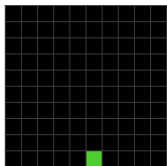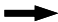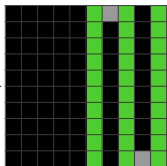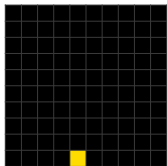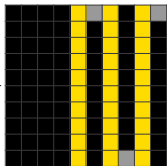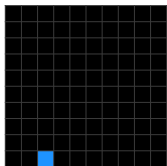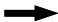

?

Supplement: supplementary_material [file 8403a5d5_problem.pdf › CompressARC/results_for_the_blog_post/plots_training/8403a5d5_problem.pdf]

sample

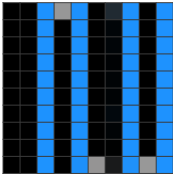

sample average

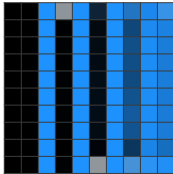

guess 1

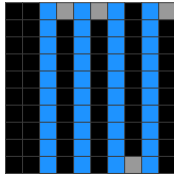

guess 2

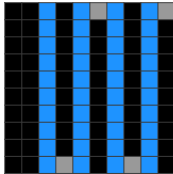

Supplement: supplementary_material [file 8403a5d5_solutions.pdf › CompressARC/results_for_the_blog_post/plots_training/8403a5d5_solutions.pdf]

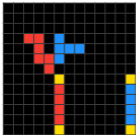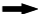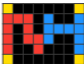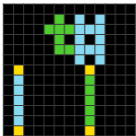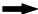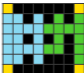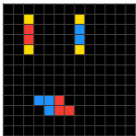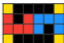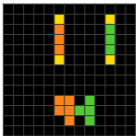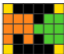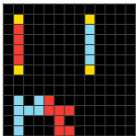

?

Supplement: supplementary_material [file 846bdb03_problem.pdf › CompressARC/results_for_the_blog_post/plots_training/846bdb03_problem.pdf]

sample

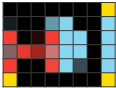

sample average

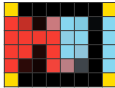

guess 1

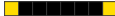

guess 2

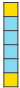

Supplement: supplementary_material [file 846bdb03_solutions.pdf › CompressARC/results_for_the_blog_post/plots_training/846bdb03_solutions.pdf]

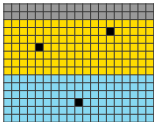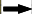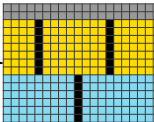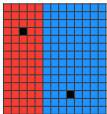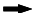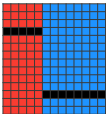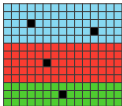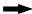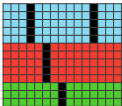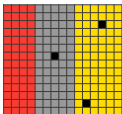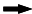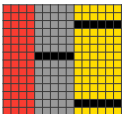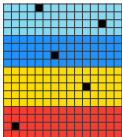

?

Supplement: supplementary_material [file 855e0971_problem.pdf › CompressARC/results_for_the_blog_post/plots_training/855e0971_problem.pdf]
