# Supplementary material (part 11 of 17)
Source: ML conference proceedings conference paper supplement (https://openreview.net/forum?id=jLC662Yo5h)

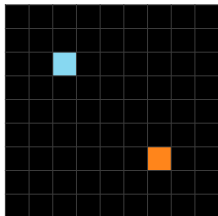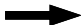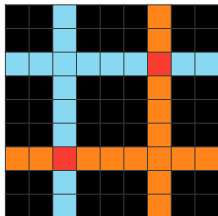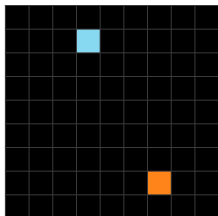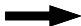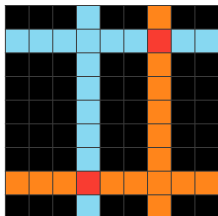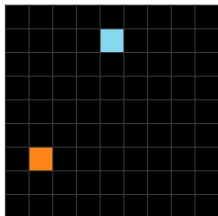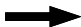

?

Supplement: supplementary_material [file 23581191_problem.pdf › CompressARC/results_for_the_blog_post/plots_training/23581191_problem.pdf]

sample

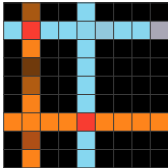

sample average

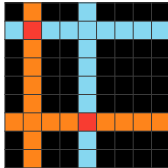

guess 1

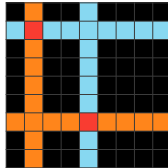

guess 2

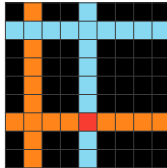

Supplement: supplementary_material [file 23581191_solutions.pdf › CompressARC/results_for_the_blog_post/plots_training/23581191_solutions.pdf]

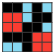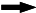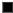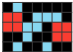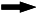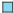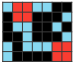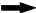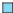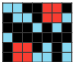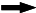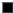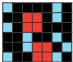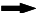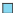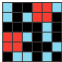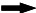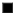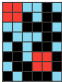

?

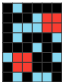

?

Supplement: supplementary_material [file 239be575_problem.pdf › CompressARC/results_for_the_blog_post/plots_training/239be575_problem.pdf]

sample

sample average

guess 1

guess 2

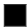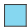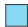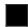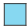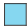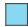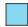

Supplement: supplementary_material [file 239be575_solutions.pdf › CompressARC/results_for_the_blog_post/plots_training/239be575_solutions.pdf]

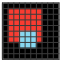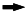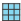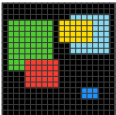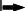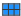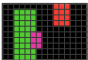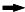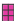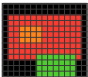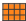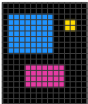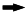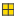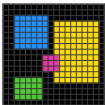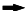

?

Supplement: supplementary_material [file 23b5c85d_problem.pdf › CompressARC/results_for_the_blog_post/plots_training/23b5c85d_problem.pdf]

sample

sample average

guess 1

guess 2

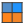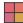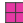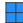

Supplement: supplementary_material [file 23b5c85d_solutions.pdf › CompressARC/results_for_the_blog_post/plots_training/23b5c85d_solutions.pdf]

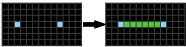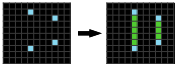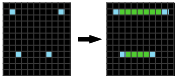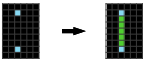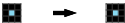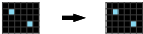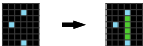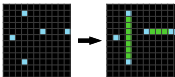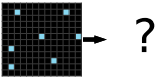

Supplement: supplementary_material [file 253bf280_problem.pdf › CompressARC/results_for_the_blog_post/plots_training/253bf280_problem.pdf]

sample

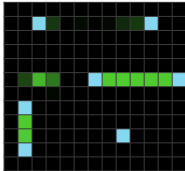

sample average

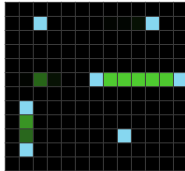

guess 1

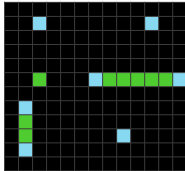

guess 2

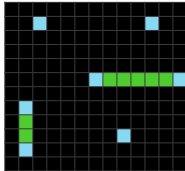

Supplement: supplementary_material [file 253bf280_solutions.pdf › CompressARC/results_for_the_blog_post/plots_training/253bf280_solutions.pdf]

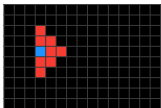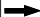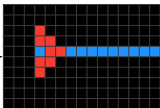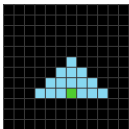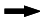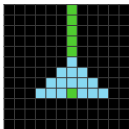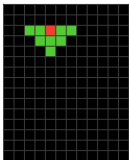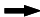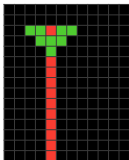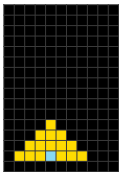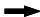

?

Supplement: supplementary_material [file 25d487eb_problem.pdf › CompressARC/results_for_the_blog_post/plots_training/25d487eb_problem.pdf]

sample

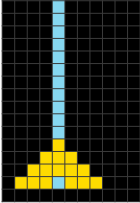

sample average

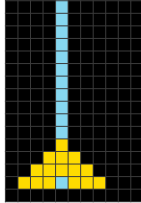

guess 1

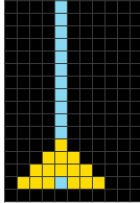

guess 2

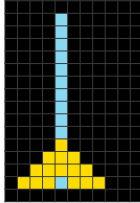

Supplement: supplementary_material [file 25d487eb_solutions.pdf › CompressARC/results_for_the_blog_post/plots_training/25d487eb_solutions.pdf]

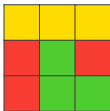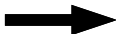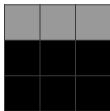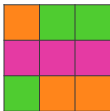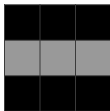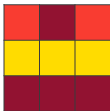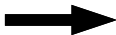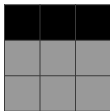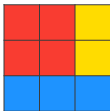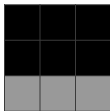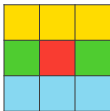

?

Supplement: supplementary_material [file 25d8a9c8_problem.pdf › CompressARC/results_for_the_blog_post/plots_training/25d8a9c8_problem.pdf]

sample

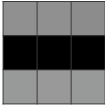

sample average

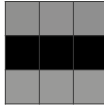

guess 1

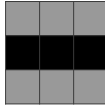

guess 2

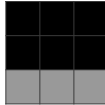

Supplement: supplementary_material [file 25d8a9c8_solutions.pdf › CompressARC/results_for_the_blog_post/plots_training/25d8a9c8_solutions.pdf]

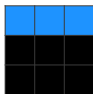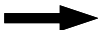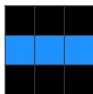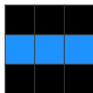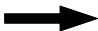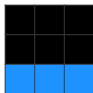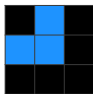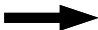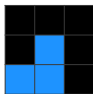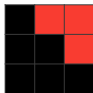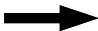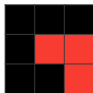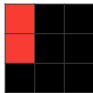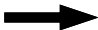

?

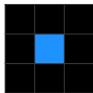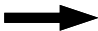

?

Supplement: supplementary_material [file 25ff71a9_problem.pdf › CompressARC/results_for_the_blog_post/plots_training/25ff71a9_problem.pdf]

sample

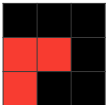

sample average

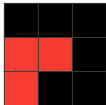

guess 1

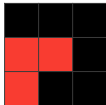

guess 2

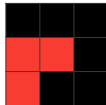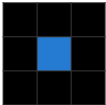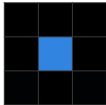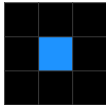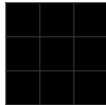

Supplement: supplementary_material [file 25ff71a9_solutions.pdf › CompressARC/results_for_the_blog_post/plots_training/25ff71a9_solutions.pdf]

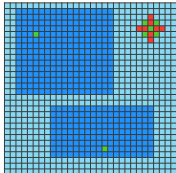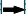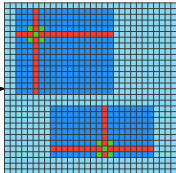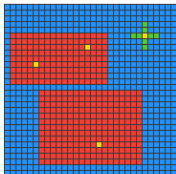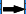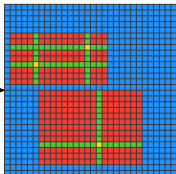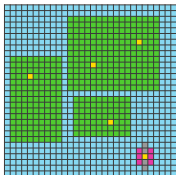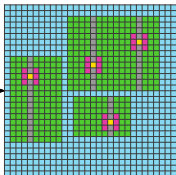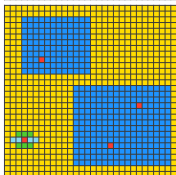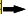

?

Supplement: supplementary_material [file 264363fd_problem.pdf › CompressARC/results_for_the_blog_post/plots_training/264363fd_problem.pdf]

sample

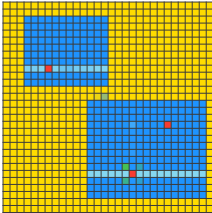

sample average

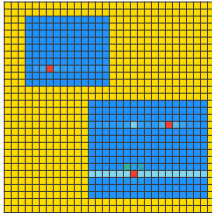

guess 1

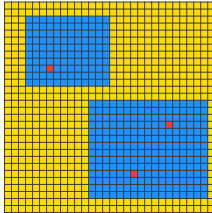

guess 2

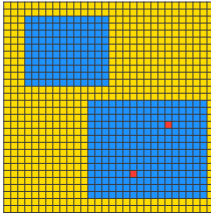

Supplement: supplementary_material [file 264363fd_solutions.pdf › CompressARC/results_for_the_blog_post/plots_training/264363fd_solutions.pdf]

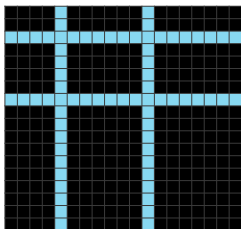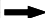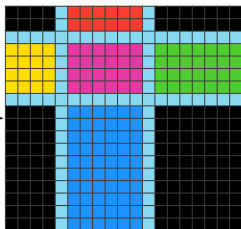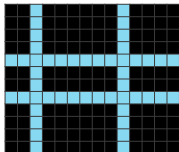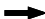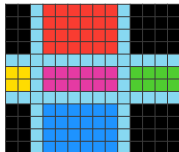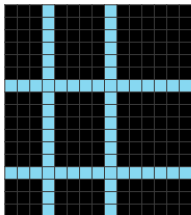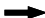

?

Supplement: supplementary_material [file 272f95fa_problem.pdf › CompressARC/results_for_the_blog_post/plots_training/272f95fa_problem.pdf]

sample

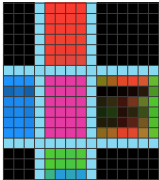

sample average

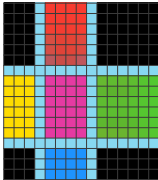

guess 1

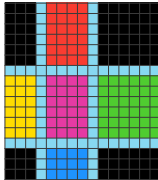

guess 2

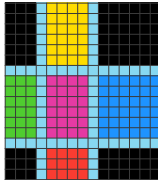

Supplement: supplementary_material [file 272f95fa_solutions.pdf › CompressARC/results_for_the_blog_post/plots_training/272f95fa_solutions.pdf]

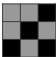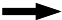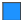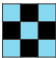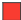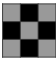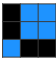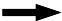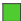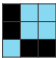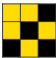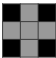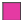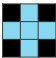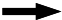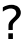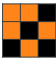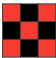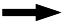

Supplement: supplementary_material [file 27a28665_problem.pdf › CompressARC/results_for_the_blog_post/plots_training/27a28665_problem.pdf]

sample

sample average

guess 1

guess 2

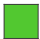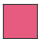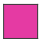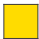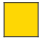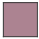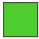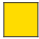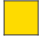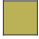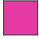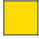

Supplement: supplementary_material [file 27a28665_solutions.pdf › CompressARC/results_for_the_blog_post/plots_training/27a28665_solutions.pdf]

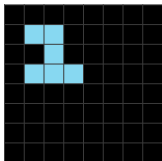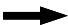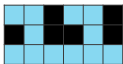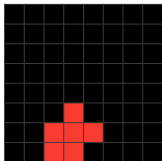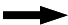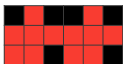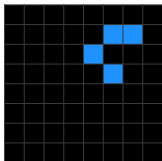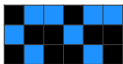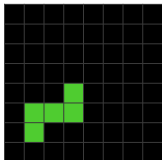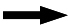

?

Supplement: supplementary_material [file 28bf18c6_problem.pdf › CompressARC/results_for_the_blog_post/plots_training/28bf18c6_problem.pdf]

sample

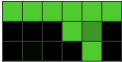

sample average

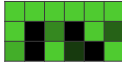

guess 1

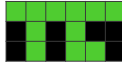

guess 2

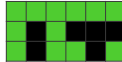

Supplement: supplementary_material [file 28bf18c6_solutions.pdf › CompressARC/results_for_the_blog_post/plots_training/28bf18c6_solutions.pdf]

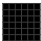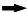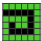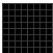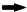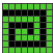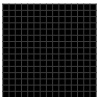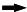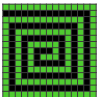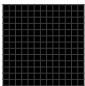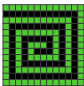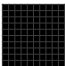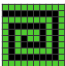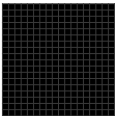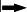

?

Supplement: supplementary_material [file 28e73c20_problem.pdf › CompressARC/results_for_the_blog_post/plots_training/28e73c20_problem.pdf]

sample

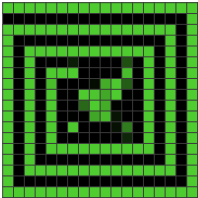

sample average

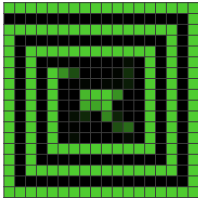

guess 1

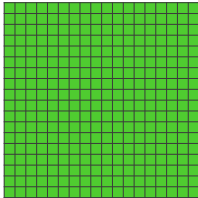

guess 2

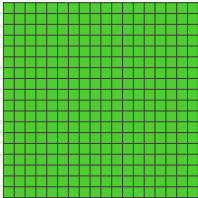

Supplement: supplementary_material [file 28e73c20_solutions.pdf › CompressARC/results_for_the_blog_post/plots_training/28e73c20_solutions.pdf]

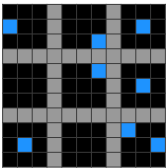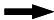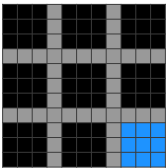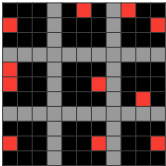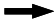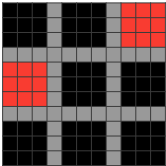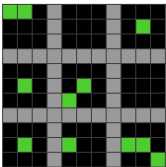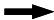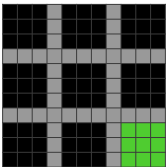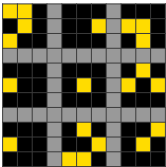

?

Supplement: supplementary_material [file 29623171_problem.pdf › CompressARC/results_for_the_blog_post/plots_training/29623171_problem.pdf]

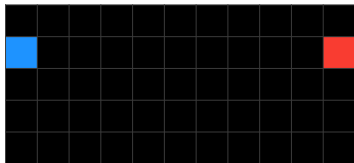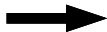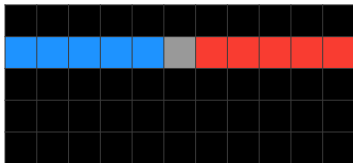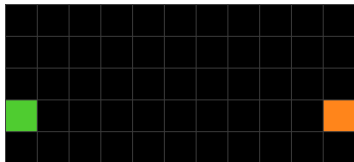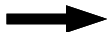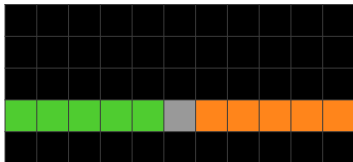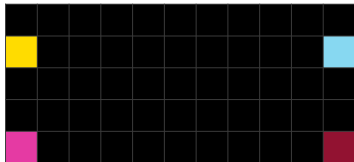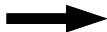

?

Supplement: supplementary_material [file 29c11459_problem.pdf › CompressARC/results_for_the_blog_post/plots_training/29c11459_problem.pdf]

sample

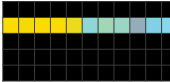

sample average

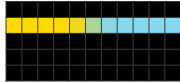

guess 1

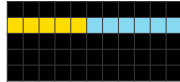

guess 2

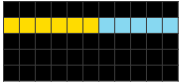

Supplement: supplementary_material [file 29c11459_solutions.pdf › CompressARC/results_for_the_blog_post/plots_training/29c11459_solutions.pdf]

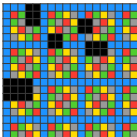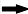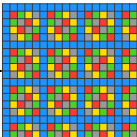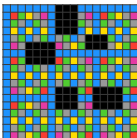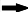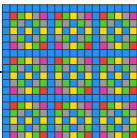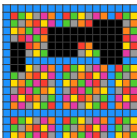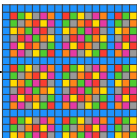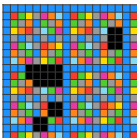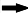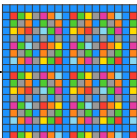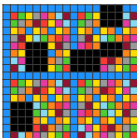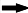

?

Supplement: supplementary_material [file 29ec7d0e_problem.pdf › CompressARC/results_for_the_blog_post/plots_training/29ec7d0e_problem.pdf]

sample

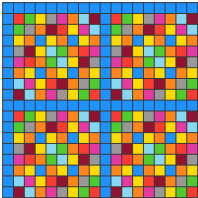

sample average

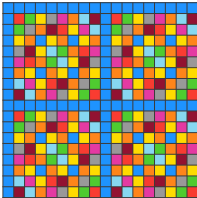

guess 1

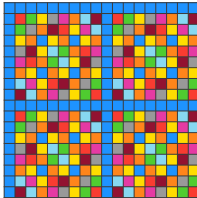

guess 2

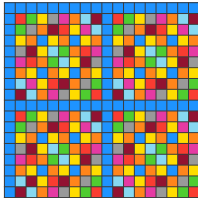

Supplement: supplementary_material [file 29ec7d0e_solutions.pdf › CompressARC/results_for_the_blog_post/plots_training/29ec7d0e_solutions.pdf]

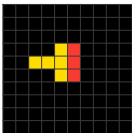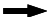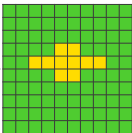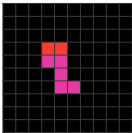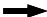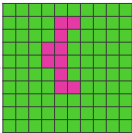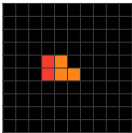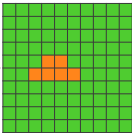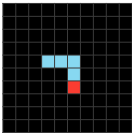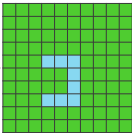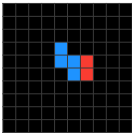

?

Supplement: supplementary_material [file 2bcee788_problem.pdf › CompressARC/results_for_the_blog_post/plots_training/2bcee788_problem.pdf]

sample

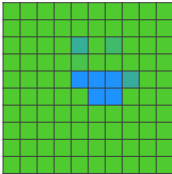

sample average

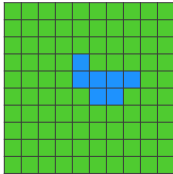

guess 1

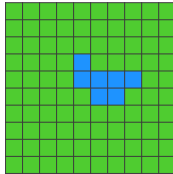

guess 2

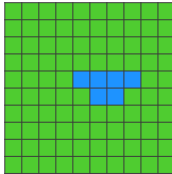

Supplement: supplementary_material [file 2bcee788_solutions.pdf › CompressARC/results_for_the_blog_post/plots_training/2bcee788_solutions.pdf]

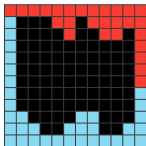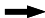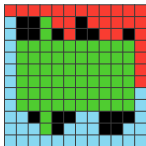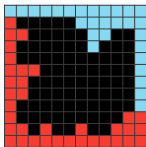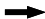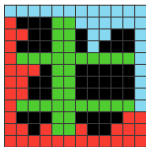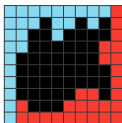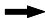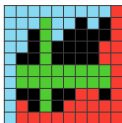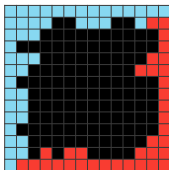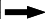

?

Supplement: supplementary_material [file 2bee17df_problem.pdf › CompressARC/results_for_the_blog_post/plots_training/2bee17df_problem.pdf]

sample

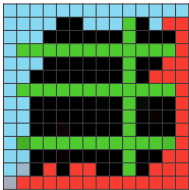

sample average

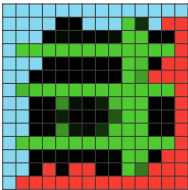

guess 1

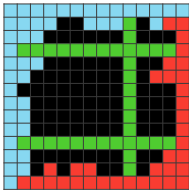

guess 2

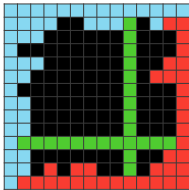

Supplement: supplementary_material [file 2bee17df_solutions.pdf › CompressARC/results_for_the_blog_post/plots_training/2bee17df_solutions.pdf]

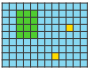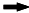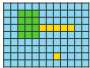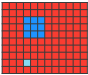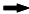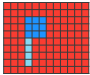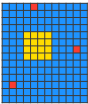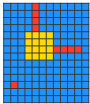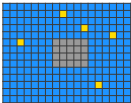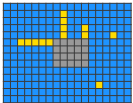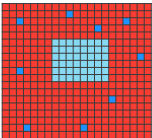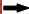

?

Supplement: supplementary_material [file 2c608aff_problem.pdf › CompressARC/results_for_the_blog_post/plots_training/2c608aff_problem.pdf]

sample

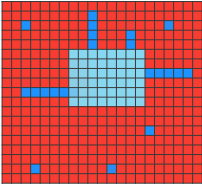

sample average

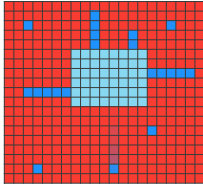

guess 1

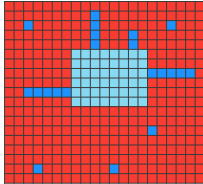

guess 2

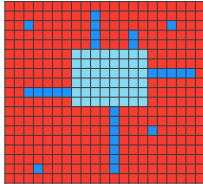

Supplement: supplementary_material [file 2c608aff_solutions.pdf › CompressARC/results_for_the_blog_post/plots_training/2c608aff_solutions.pdf]

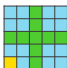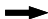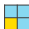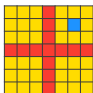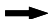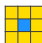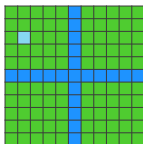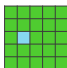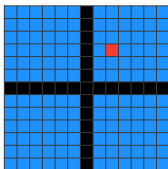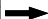

?

Supplement: supplementary_material [file 2dc579da_problem.pdf › CompressARC/results_for_the_blog_post/plots_training/2dc579da_problem.pdf]

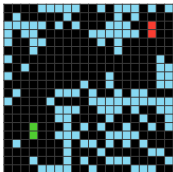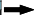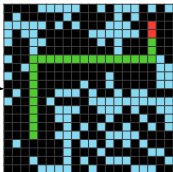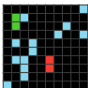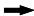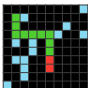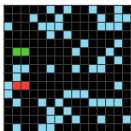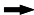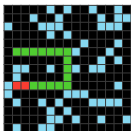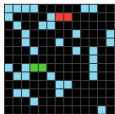

?

Supplement: supplementary_material [file 2dd70a9a_problem.pdf › CompressARC/results_for_the_blog_post/plots_training/2dd70a9a_problem.pdf]

sample

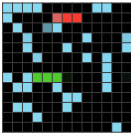

sample average

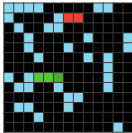

guess 1

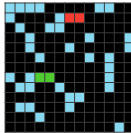

guess 2

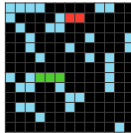

Supplement: supplementary_material [file 2dd70a9a_solutions.pdf › CompressARC/results_for_the_blog_post/plots_training/2dd70a9a_solutions.pdf]

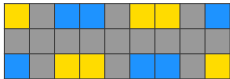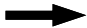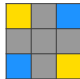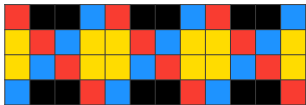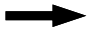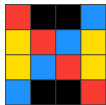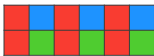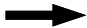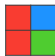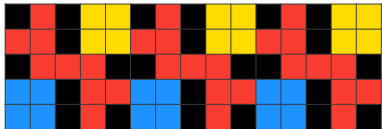

?

Supplement: supplementary_material [file 2dee498d_problem.pdf › CompressARC/results_for_the_blog_post/plots_training/2dee498d_problem.pdf]

sample

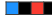

sample average

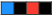

guess 1

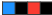

guess 2

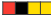

Supplement: supplementary_material [file 2dee498d_solutions.pdf › CompressARC/results_for_the_blog_post/plots_training/2dee498d_solutions.pdf]

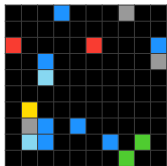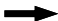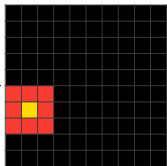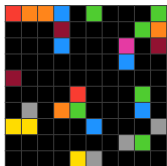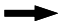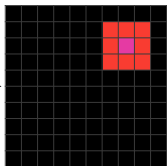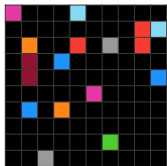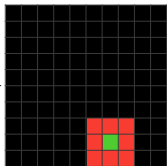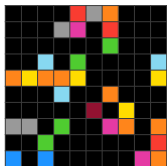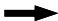

?

Supplement: supplementary_material [file 31aa019c_problem.pdf › CompressARC/results_for_the_blog_post/plots_training/31aa019c_problem.pdf]

sample

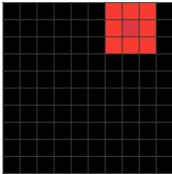

sample average

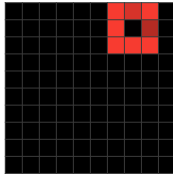

guess 1

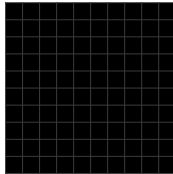

guess 2

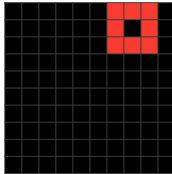

Supplement: supplementary_material [file 31aa019c_solutions.pdf › CompressARC/results_for_the_blog_post/plots_training/31aa019c_solutions.pdf]

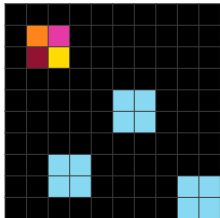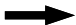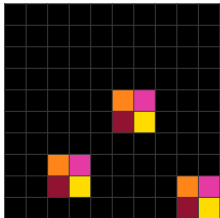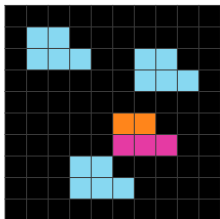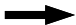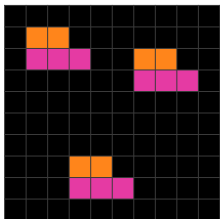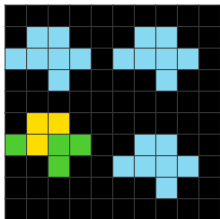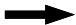

?

Supplement: supplementary_material [file 321b1fc6_problem.pdf › CompressARC/results_for_the_blog_post/plots_training/321b1fc6_problem.pdf]

sample

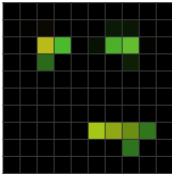

sample average

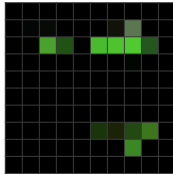

guess 1

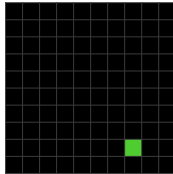

guess 2

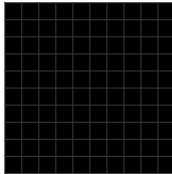

Supplement: supplementary_material [file 321b1fc6_solutions.pdf › CompressARC/results_for_the_blog_post/plots_training/321b1fc6_solutions.pdf]

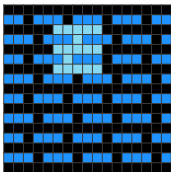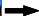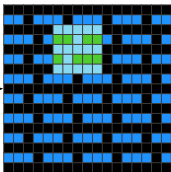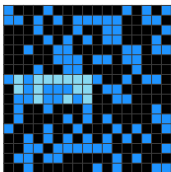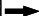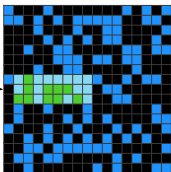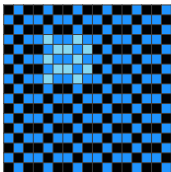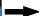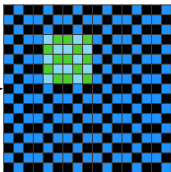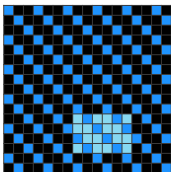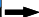

?

Supplement: supplementary_material [file 32597951_problem.pdf › CompressARC/results_for_the_blog_post/plots_training/32597951_problem.pdf]

sample

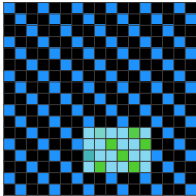

sample average

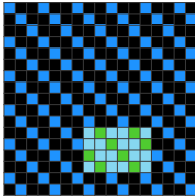

guess 1

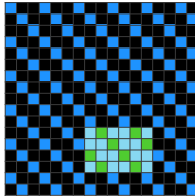

guess 2

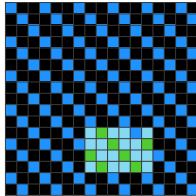

Supplement: supplementary_material [file 32597951_solutions.pdf › CompressARC/results_for_the_blog_post/plots_training/32597951_solutions.pdf]

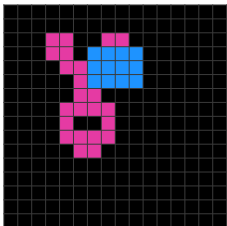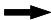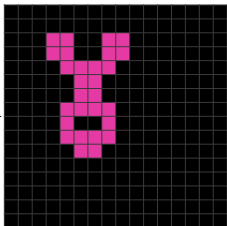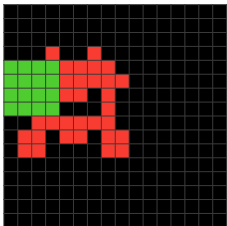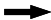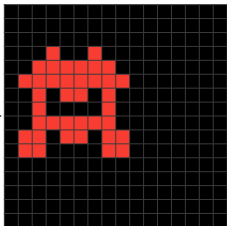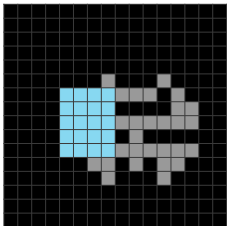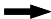

?

Supplement: supplementary_material [file 3345333e_problem.pdf › CompressARC/results_for_the_blog_post/plots_training/3345333e_problem.pdf]

sample

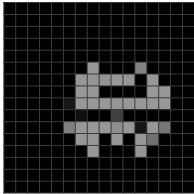

sample average

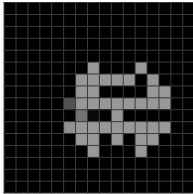

guess 1

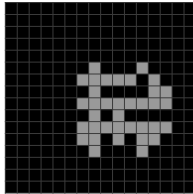

guess 2

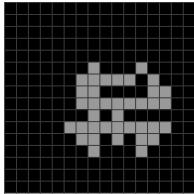

Supplement: supplementary_material [file 3345333e_solutions.pdf › CompressARC/results_for_the_blog_post/plots_training/3345333e_solutions.pdf]

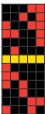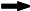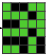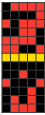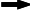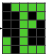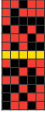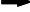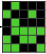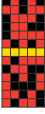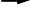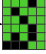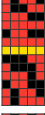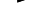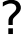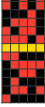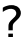

Supplement: supplementary_material [file 3428a4f5_problem.pdf › CompressARC/results_for_the_blog_post/plots_training/3428a4f5_problem.pdf]

sample

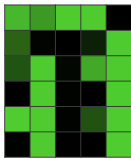

sample average

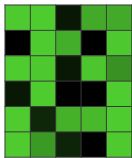

guess 1

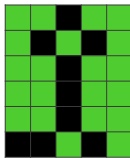

guess 2

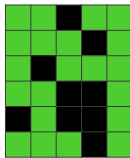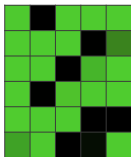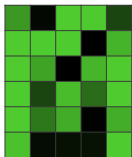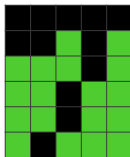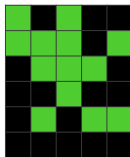

Supplement: supplementary_material [file 3428a4f5_solutions.pdf › CompressARC/results_for_the_blog_post/plots_training/3428a4f5_solutions.pdf]

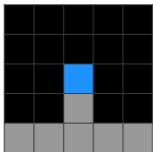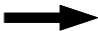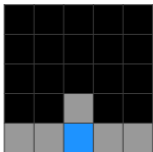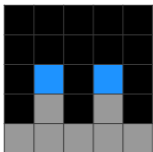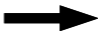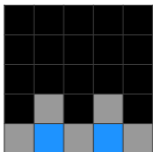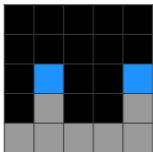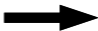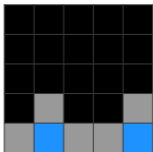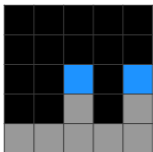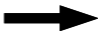

?

Supplement: supplementary_material [file 3618c87e_problem.pdf › CompressARC/results_for_the_blog_post/plots_training/3618c87e_problem.pdf]

sample

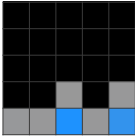

sample average

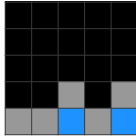

guess 1

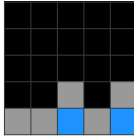

guess 2

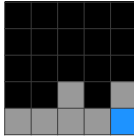

Supplement: supplementary_material [file 3618c87e_solutions.pdf › CompressARC/results_for_the_blog_post/plots_training/3618c87e_solutions.pdf]

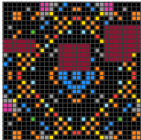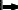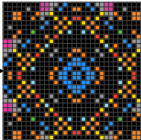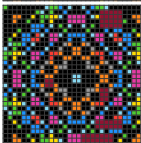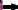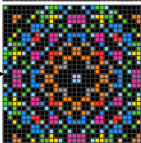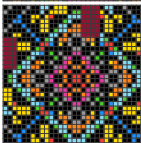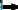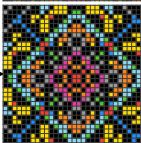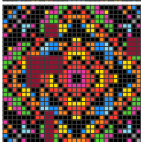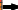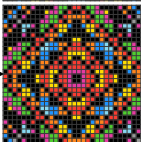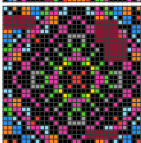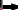

?

Supplement: supplementary_material [file 3631a71a_problem.pdf › CompressARC/results_for_the_blog_post/plots_training/3631a71a_problem.pdf]

sample

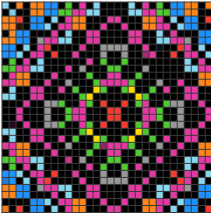

sample average

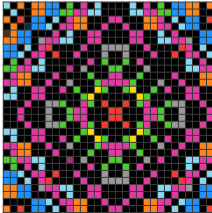

guess 1

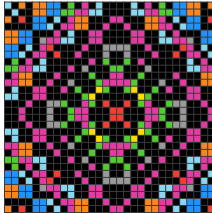

guess 2

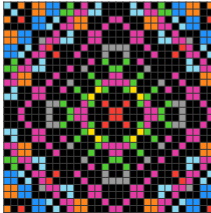

Supplement: supplementary_material [file 3631a71a_solutions.pdf › CompressARC/results_for_the_blog_post/plots_training/3631a71a_solutions.pdf]

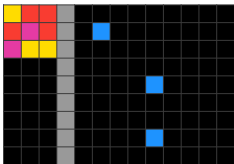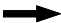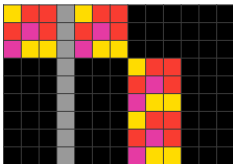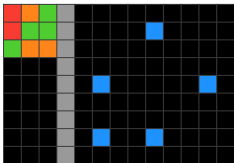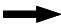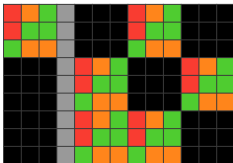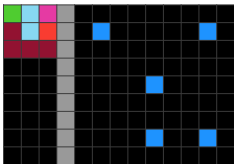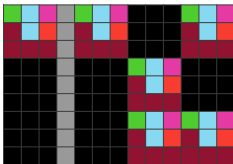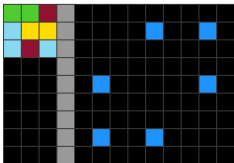

?

Supplement: supplementary_material [file 363442ee_problem.pdf › CompressARC/results_for_the_blog_post/plots_training/363442ee_problem.pdf]

sample

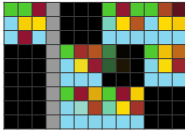

sample average

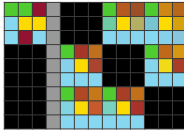

guess 1

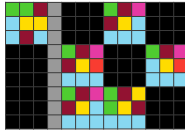

guess 2

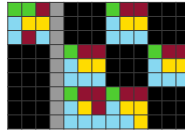

Supplement: supplementary_material [file 363442ee_solutions.pdf › CompressARC/results_for_the_blog_post/plots_training/363442ee_solutions.pdf]

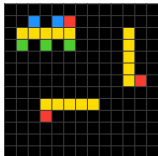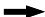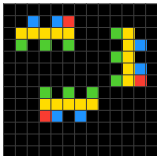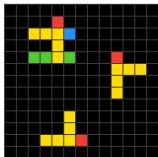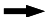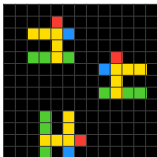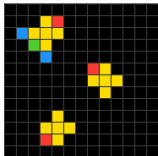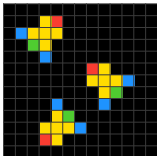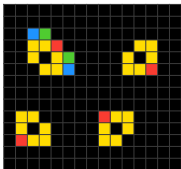

?

Supplement: supplementary_material [file 36d67576_problem.pdf › CompressARC/results_for_the_blog_post/plots_training/36d67576_problem.pdf]

sample

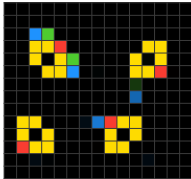

sample average

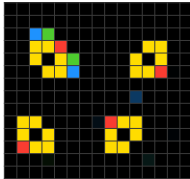

guess 1

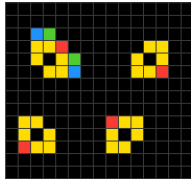

guess 2

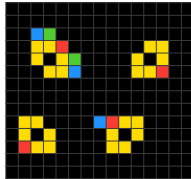

Supplement: supplementary_material [file 36d67576_solutions.pdf › CompressARC/results_for_the_blog_post/plots_training/36d67576_solutions.pdf]

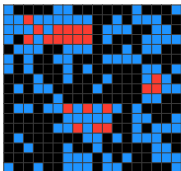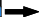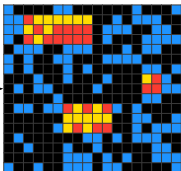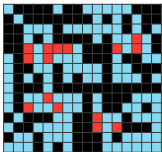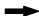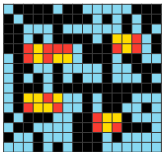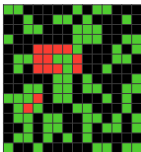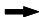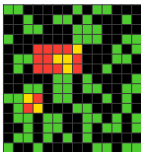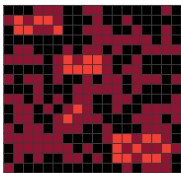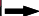

?

Supplement: supplementary_material [file 36fdfd69_problem.pdf › CompressARC/results_for_the_blog_post/plots_training/36fdfd69_problem.pdf]

sample

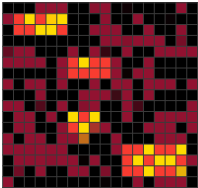

sample average

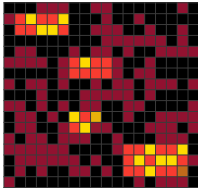

guess 1

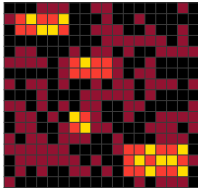

guess 2

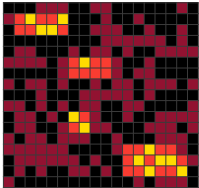

Supplement: supplementary_material [file 36fdfd69_solutions.pdf › CompressARC/results_for_the_blog_post/plots_training/36fdfd69_solutions.pdf]

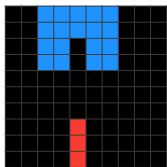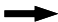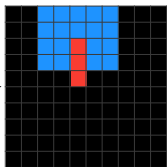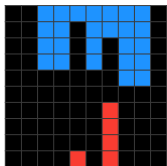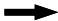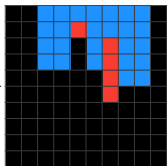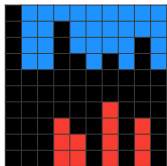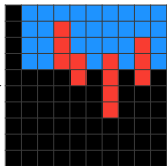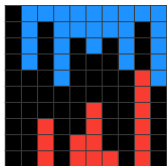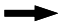

?

Supplement: supplementary_material [file 3906de3d_problem.pdf › CompressARC/results_for_the_blog_post/plots_training/3906de3d_problem.pdf]

sample

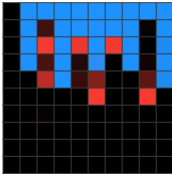

sample average

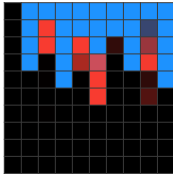

guess 1

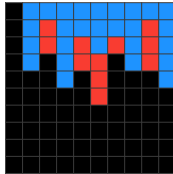

guess 2

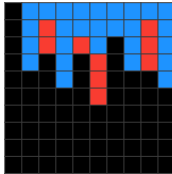

Supplement: supplementary_material [file 3906de3d_solutions.pdf › CompressARC/results_for_the_blog_post/plots_training/3906de3d_solutions.pdf]

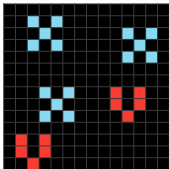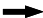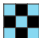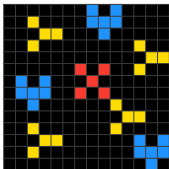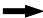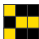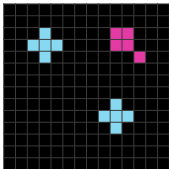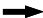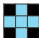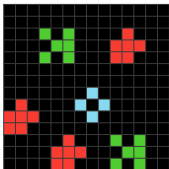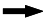

?

Supplement: supplementary_material [file 39a8645d_problem.pdf › CompressARC/results_for_the_blog_post/plots_training/39a8645d_problem.pdf]

sample

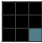

sample average

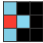

guess 1

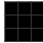

guess 2

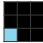

Supplement: supplementary_material [file 39a8645d_solutions.pdf › CompressARC/results_for_the_blog_post/plots_training/39a8645d_solutions.pdf]

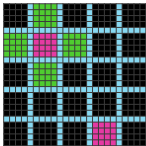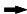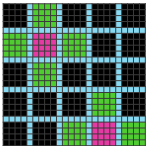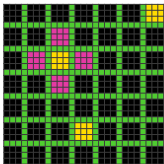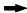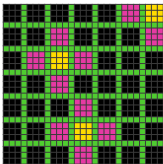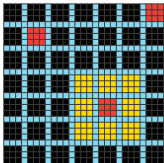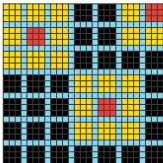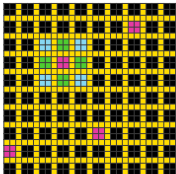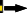

?

Supplement: supplementary_material [file 39e1d7f9_problem.pdf › CompressARC/results_for_the_blog_post/plots_training/39e1d7f9_problem.pdf]

sample

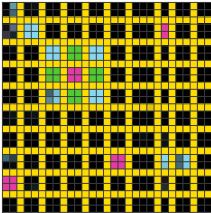

sample average

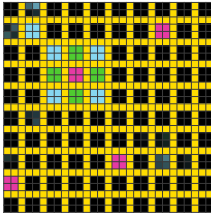

guess 1

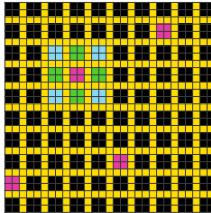

guess 2

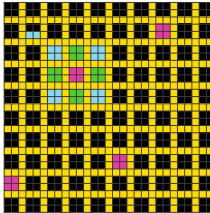

Supplement: supplementary_material [file 39e1d7f9_solutions.pdf › CompressARC/results_for_the_blog_post/plots_training/39e1d7f9_solutions.pdf]

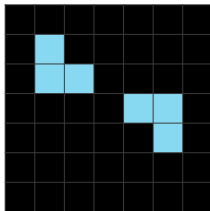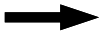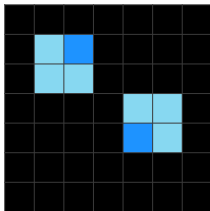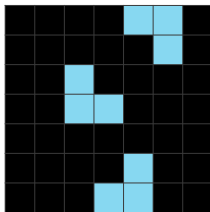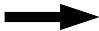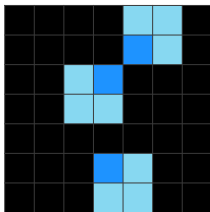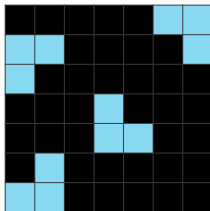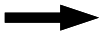

?

Supplement: supplementary_material [file 3aa6fb7a_problem.pdf › CompressARC/results_for_the_blog_post/plots_training/3aa6fb7a_problem.pdf]

sample

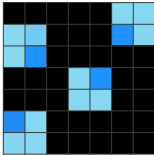

sample average

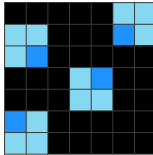

guess 1

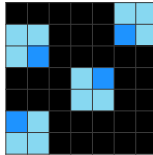

guess 2

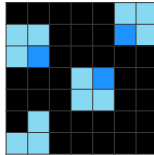

Supplement: supplementary_material [file 3aa6fb7a_solutions.pdf › CompressARC/results_for_the_blog_post/plots_training/3aa6fb7a_solutions.pdf]

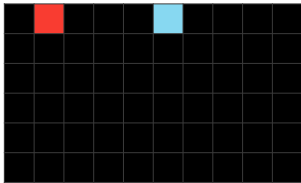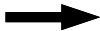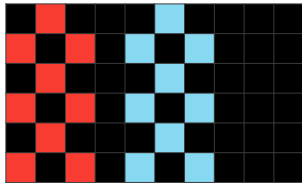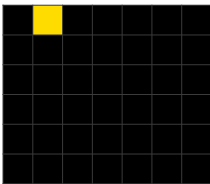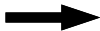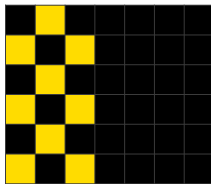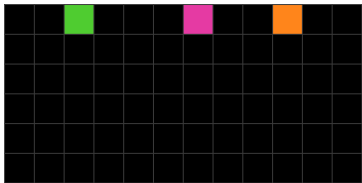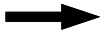

?

Supplement: supplementary_material [file 3ac3eb23_problem.pdf › CompressARC/results_for_the_blog_post/plots_training/3ac3eb23_problem.pdf]

sample

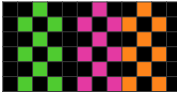

sample average

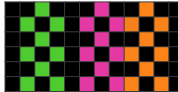

guess 1

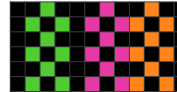

guess 2

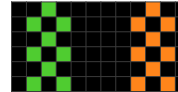

Supplement: supplementary_material [file 3ac3eb23_solutions.pdf › CompressARC/results_for_the_blog_post/plots_training/3ac3eb23_solutions.pdf]

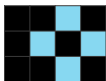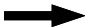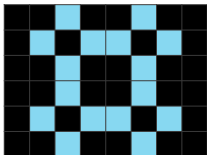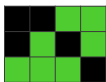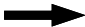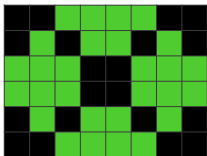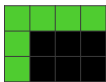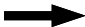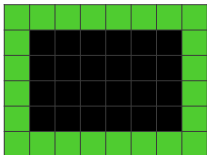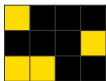

?

Supplement: supplementary_material [file 3af2c5a8_problem.pdf › CompressARC/results_for_the_blog_post/plots_training/3af2c5a8_problem.pdf]

sample

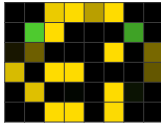

sample average

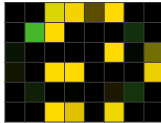

guess 1

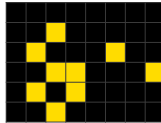

guess 2

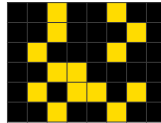

Supplement: supplementary_material [file 3af2c5a8_solutions.pdf › CompressARC/results_for_the_blog_post/plots_training/3af2c5a8_solutions.pdf]

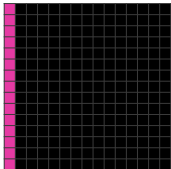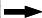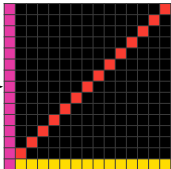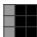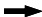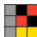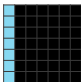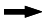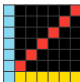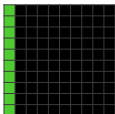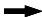

?

Supplement: supplementary_material [file 3bd67248_problem.pdf › CompressARC/results_for_the_blog_post/plots_training/3bd67248_problem.pdf]

sample

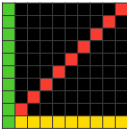

sample average

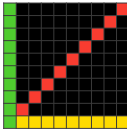

guess 1

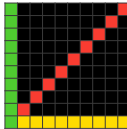

guess 2

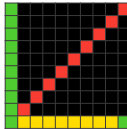

Supplement: supplementary_material [file 3bd67248_solutions.pdf › CompressARC/results_for_the_blog_post/plots_training/3bd67248_solutions.pdf]

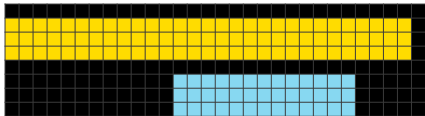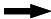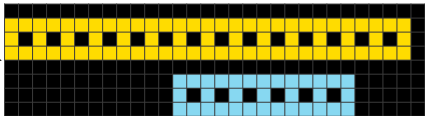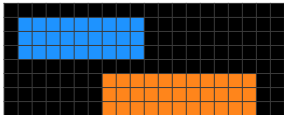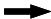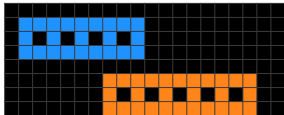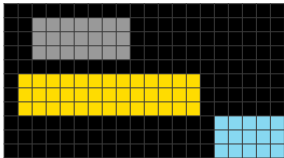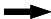

?

Supplement: supplementary_material [file 3bdb4ada_problem.pdf › CompressARC/results_for_the_blog_post/plots_training/3bdb4ada_problem.pdf]

sample

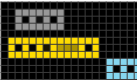

sample average

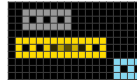

guess 1

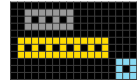

guess 2

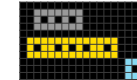

Supplement: supplementary_material [file 3bdb4ada_solutions.pdf › CompressARC/results_for_the_blog_post/plots_training/3bdb4ada_solutions.pdf]

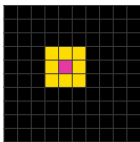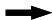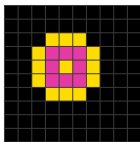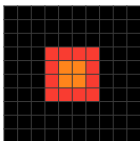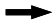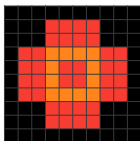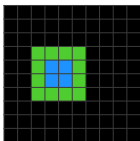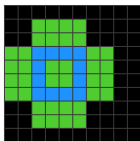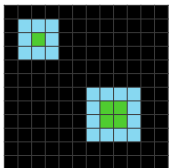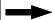

?

Supplement: supplementary_material [file 3befdf3e_problem.pdf › CompressARC/results_for_the_blog_post/plots_training/3befdf3e_problem.pdf]

sample

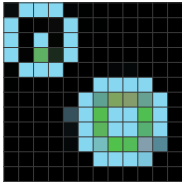

sample average

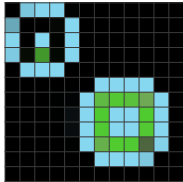

guess 1

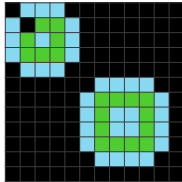

guess 2

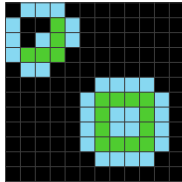

Supplement: supplementary_material [file 3befdf3e_solutions.pdf › CompressARC/results_for_the_blog_post/plots_training/3befdf3e_solutions.pdf]

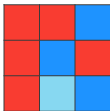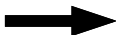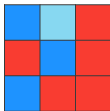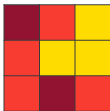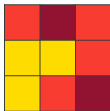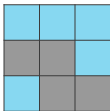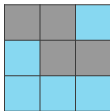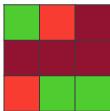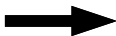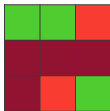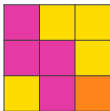

?

Supplement: supplementary_material [file 3c9b0459_problem.pdf › CompressARC/results_for_the_blog_post/plots_training/3c9b0459_problem.pdf]

sample

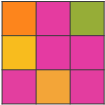

sample average

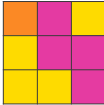

guess 1

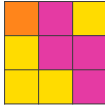

guess 2

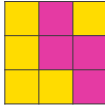

Supplement: supplementary_material [file 3c9b0459_solutions.pdf › CompressARC/results_for_the_blog_post/plots_training/3c9b0459_solutions.pdf]

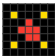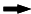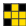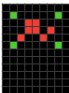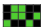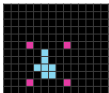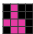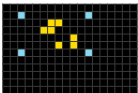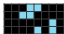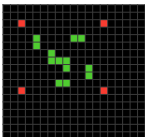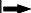

?

Supplement: supplementary_material [file 3de23699_problem.pdf › CompressARC/results_for_the_blog_post/plots_training/3de23699_problem.pdf]

sample

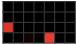

sample average

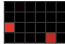

guess 1

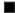

guess 2

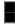

Supplement: supplementary_material [file 3de23699_solutions.pdf › CompressARC/results_for_the_blog_post/plots_training/3de23699_solutions.pdf]

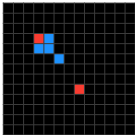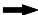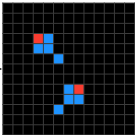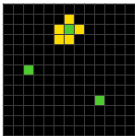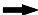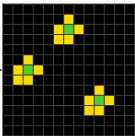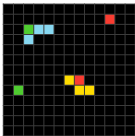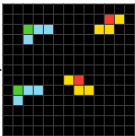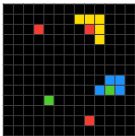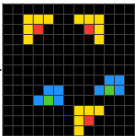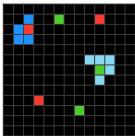

?

Supplement: supplementary_material [file 3e980e27_problem.pdf › CompressARC/results_for_the_blog_post/plots_training/3e980e27_problem.pdf]

sample

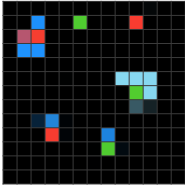

sample average

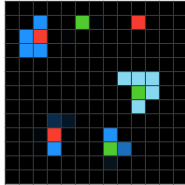

guess 1

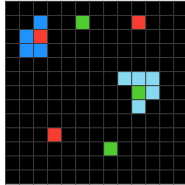

guess 2

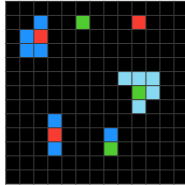

Supplement: supplementary_material [file 3e980e27_solutions.pdf › CompressARC/results_for_the_blog_post/plots_training/3e980e27_solutions.pdf]

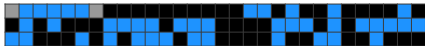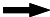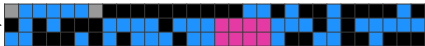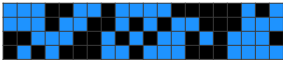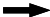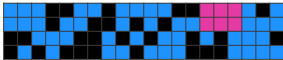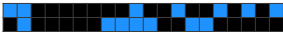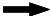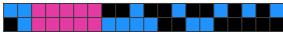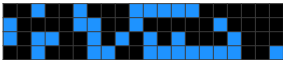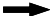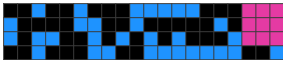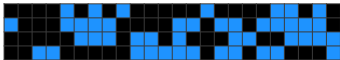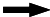

?

Supplement: supplementary_material [file 3eda0437_problem.pdf › CompressARC/results_for_the_blog_post/plots_training/3eda0437_problem.pdf]

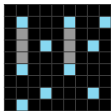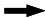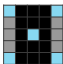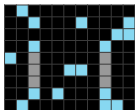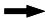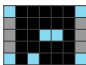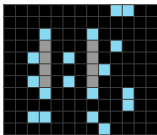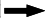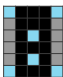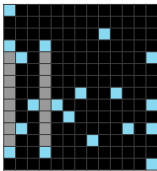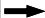

?

Supplement: supplementary_material [file 3f7978a0_problem.pdf › CompressARC/results_for_the_blog_post/plots_training/3f7978a0_problem.pdf]

sample

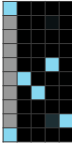

sample average

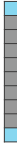

guess 1

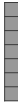

guess 2

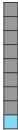

Supplement: supplementary_material [file 3f7978a0_solutions.pdf › CompressARC/results_for_the_blog_post/plots_training/3f7978a0_solutions.pdf]

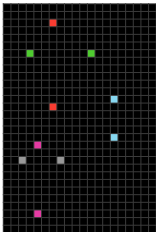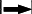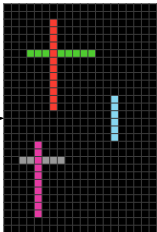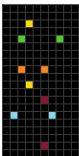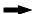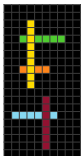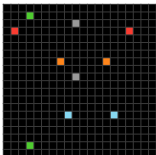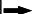

?

Supplement: supplementary_material [file 40853293_problem.pdf › CompressARC/results_for_the_blog_post/plots_training/40853293_problem.pdf]

sample

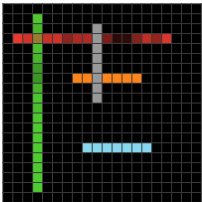

sample average

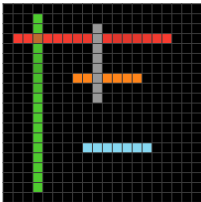

guess 1

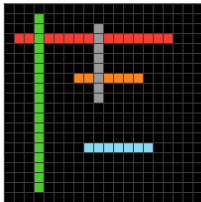

guess 2

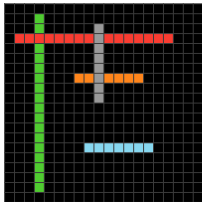

Supplement: supplementary_material [file 40853293_solutions.pdf › CompressARC/results_for_the_blog_post/plots_training/40853293_solutions.pdf]

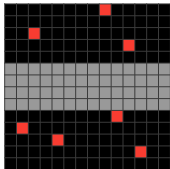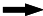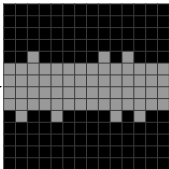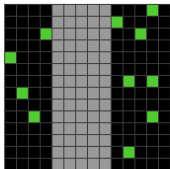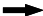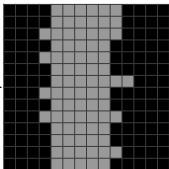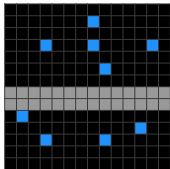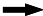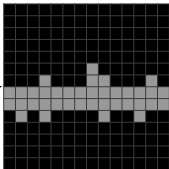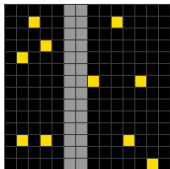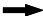

?

Supplement: supplementary_material [file 4093f84a_problem.pdf › CompressARC/results_for_the_blog_post/plots_training/4093f84a_problem.pdf]

sample

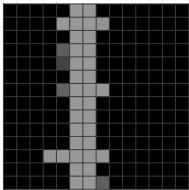

sample average

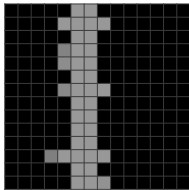

guess 1

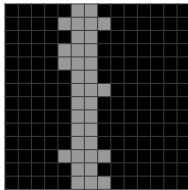

guess 2

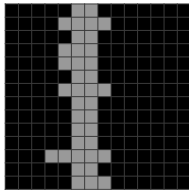

Supplement: supplementary_material [file 4093f84a_solutions.pdf › CompressARC/results_for_the_blog_post/plots_training/4093f84a_solutions.pdf]

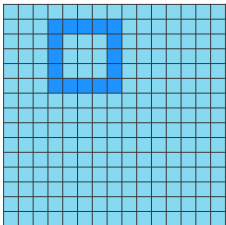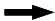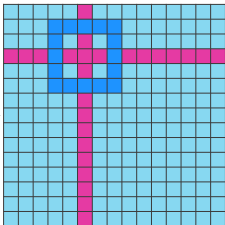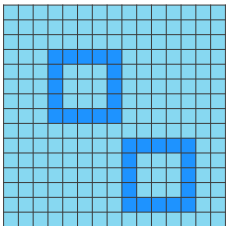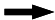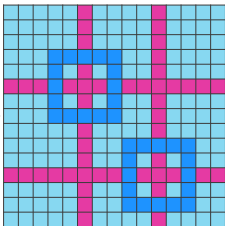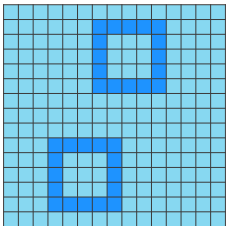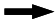

?

Supplement: supplementary_material [file 41e4d17e_problem.pdf › CompressARC/results_for_the_blog_post/plots_training/41e4d17e_problem.pdf]

sample

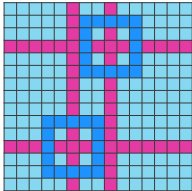

sample average

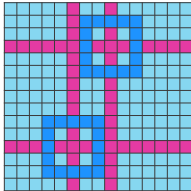

guess 1

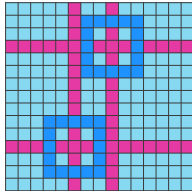

guess 2

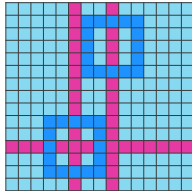

Supplement: supplementary_material [file 41e4d17e_solutions.pdf › CompressARC/results_for_the_blog_post/plots_training/41e4d17e_solutions.pdf]

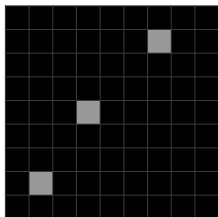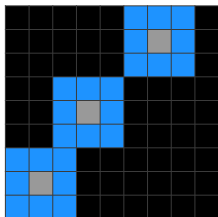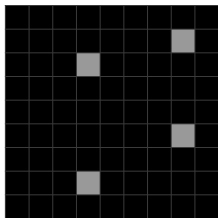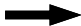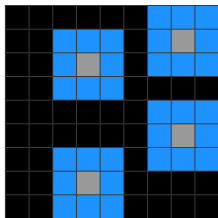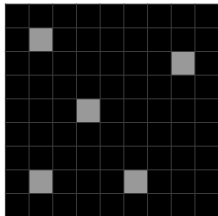

?

Supplement: supplementary_material [file 4258a5f9_problem.pdf › CompressARC/results_for_the_blog_post/plots_training/4258a5f9_problem.pdf]

sample

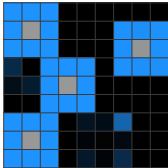

sample average

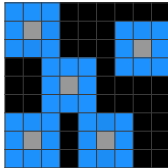

guess 1

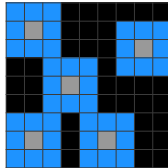

guess 2

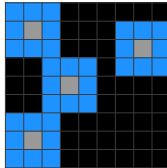

Supplement: supplementary_material [file 4258a5f9_solutions.pdf › CompressARC/results_for_the_blog_post/plots_training/4258a5f9_solutions.pdf]

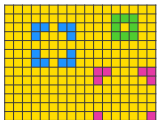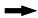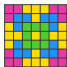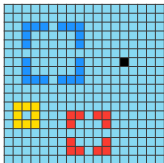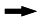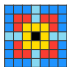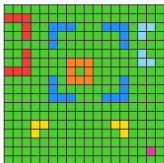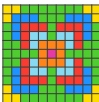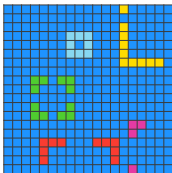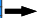

?

Supplement: supplementary_material [file 4290ef0e_problem.pdf › CompressARC/results_for_the_blog_post/plots_training/4290ef0e_problem.pdf]

sample

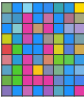

sample average

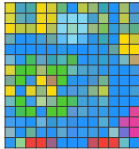

guess 1

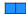

guess 2

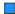

Supplement: supplementary_material [file 4290ef0e_solutions.pdf › CompressARC/results_for_the_blog_post/plots_training/4290ef0e_solutions.pdf]

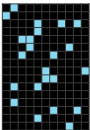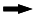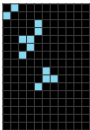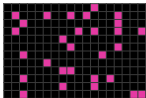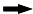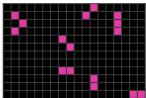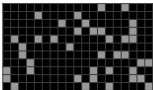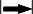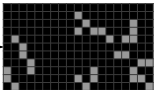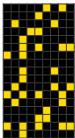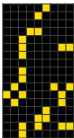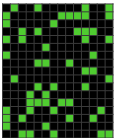

?

Supplement: supplementary_material [file 42a50994_problem.pdf › CompressARC/results_for_the_blog_post/plots_training/42a50994_problem.pdf]

sample

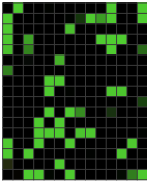

sample average

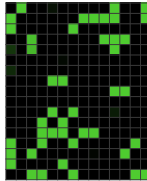

guess 1

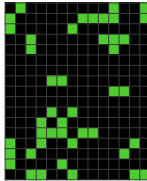

guess 2

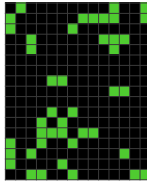

Supplement: supplementary_material [file 42a50994_solutions.pdf › CompressARC/results_for_the_blog_post/plots_training/42a50994_solutions.pdf]

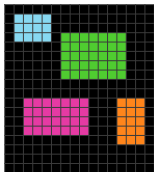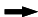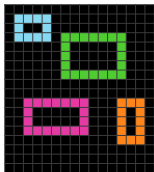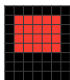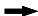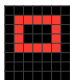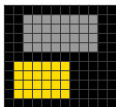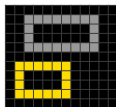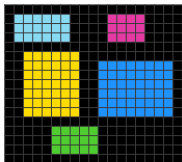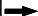

?

Supplement: supplementary_material [file 4347f46a_problem.pdf › CompressARC/results_for_the_blog_post/plots_training/4347f46a_problem.pdf]
