# Supplementary material (part 15 of 17)
Source: ML conference proceedings conference paper supplement (https://openreview.net/forum?id=jLC662Yo5h)

sample

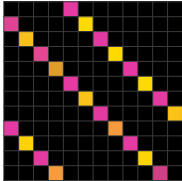

sample average

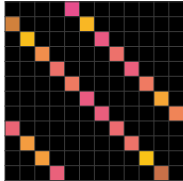

guess 1

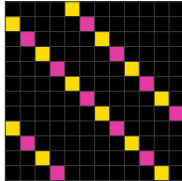

guess 2

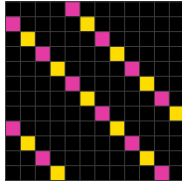

Supplement: supplementary_material [file a5f85a15_solutions.pdf › CompressARC/results_for_the_blog_post/plots_training/a5f85a15_solutions.pdf]

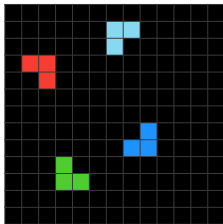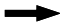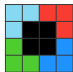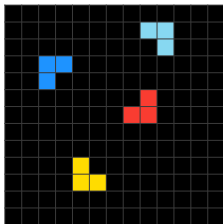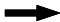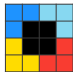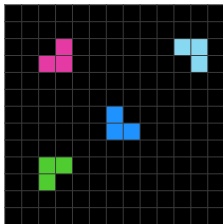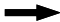

?

Supplement: supplementary_material [file a61ba2ce_problem.pdf › CompressARC/results_for_the_blog_post/plots_training/a61ba2ce_problem.pdf]

sample

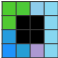

sample average

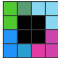

guess 1

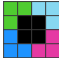

guess 2

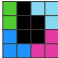

Supplement: supplementary_material [file a61ba2ce_solutions.pdf › CompressARC/results_for_the_blog_post/plots_training/a61ba2ce_solutions.pdf]

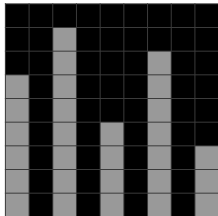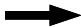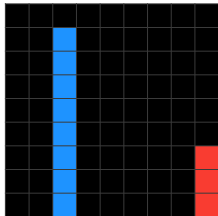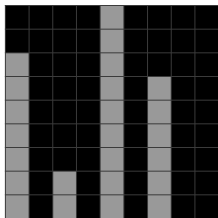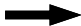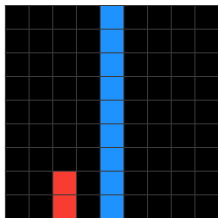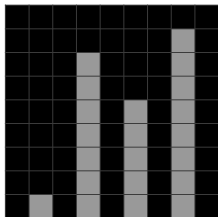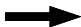

?

Supplement: supplementary_material [file a61f2674_problem.pdf › CompressARC/results_for_the_blog_post/plots_training/a61f2674_problem.pdf]

sample

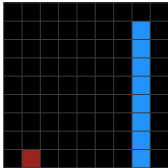

sample average

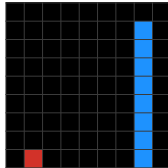

guess 1

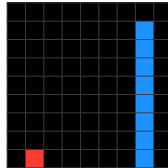

guess 2

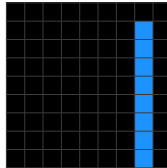

Supplement: supplementary_material [file a61f2674_solutions.pdf › CompressARC/results_for_the_blog_post/plots_training/a61f2674_solutions.pdf]

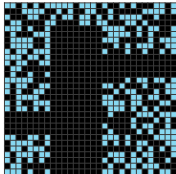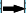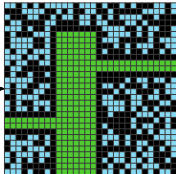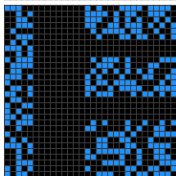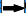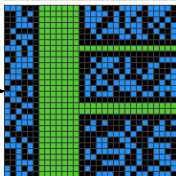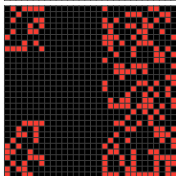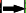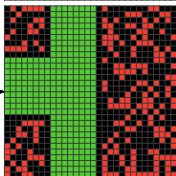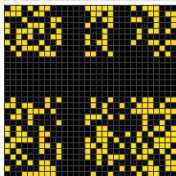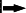

?

Supplement: supplementary_material [file a64e4611_problem.pdf › CompressARC/results_for_the_blog_post/plots_training/a64e4611_problem.pdf]

sample

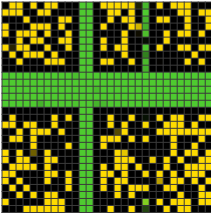

sample average

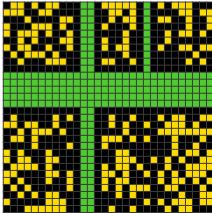

guess 1

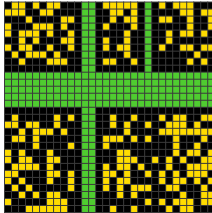

guess 2

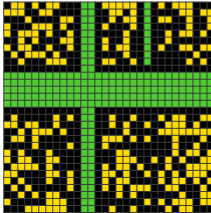

Supplement: supplementary_material [file a64e4611_solutions.pdf › CompressARC/results_for_the_blog_post/plots_training/a64e4611_solutions.pdf]

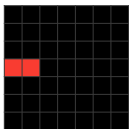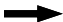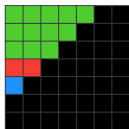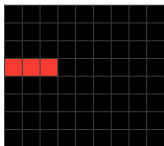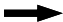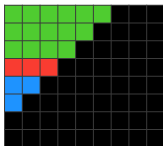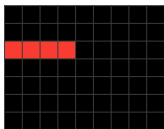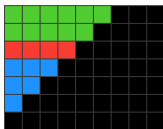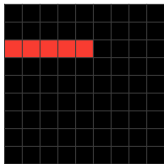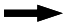

?

Supplement: supplementary_material [file a65b410d_problem.pdf › CompressARC/results_for_the_blog_post/plots_training/a65b410d_problem.pdf]

sample

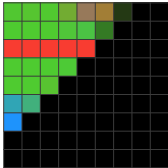

sample average

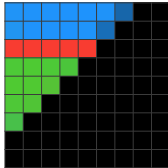

guess 1

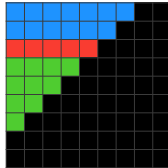

guess 2

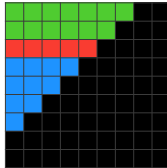

Supplement: supplementary_material [file a65b410d_solutions.pdf › CompressARC/results_for_the_blog_post/plots_training/a65b410d_solutions.pdf]

sample

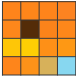

sample average

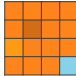

guess 1

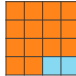

guess 2

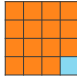

Supplement: supplementary_material [file a68b268e_solutions.pdf › CompressARC/results_for_the_blog_post/plots_training/a68b268e_solutions.pdf]

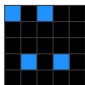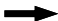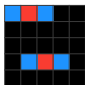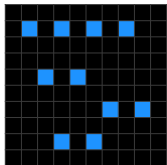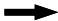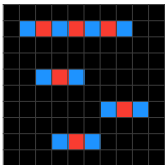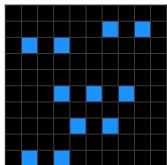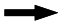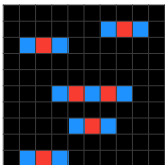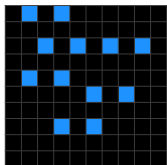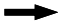

?

Supplement: supplementary_material [file a699fb00_problem.pdf › CompressARC/results_for_the_blog_post/plots_training/a699fb00_problem.pdf]

sample

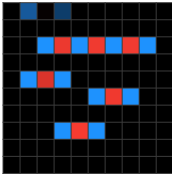

sample average

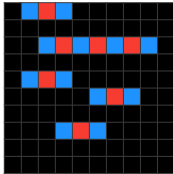

guess 1

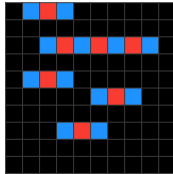

guess 2

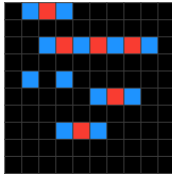

Supplement: supplementary_material [file a699fb00_solutions.pdf › CompressARC/results_for_the_blog_post/plots_training/a699fb00_solutions.pdf]

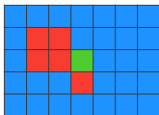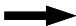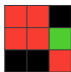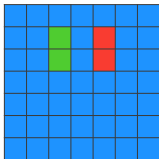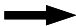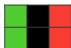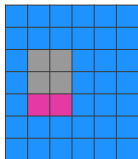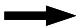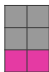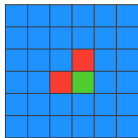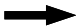

?

Supplement: supplementary_material [file a740d043_problem.pdf › CompressARC/results_for_the_blog_post/plots_training/a740d043_problem.pdf]

sample

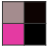

sample average

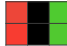

guess 1

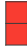

guess 2

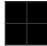

Supplement: supplementary_material [file a740d043_solutions.pdf › CompressARC/results_for_the_blog_post/plots_training/a740d043_solutions.pdf]

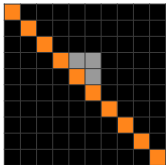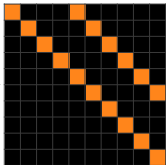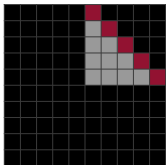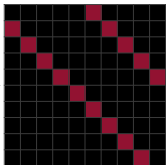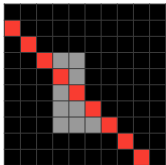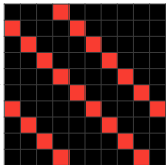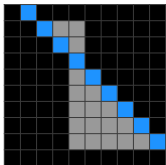

?

Supplement: supplementary_material [file a78176bb_problem.pdf › CompressARC/results_for_the_blog_post/plots_training/a78176bb_problem.pdf]

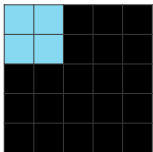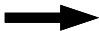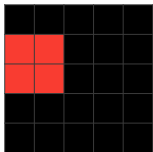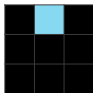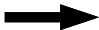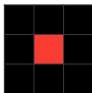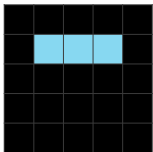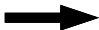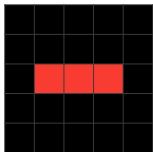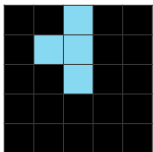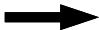

?

Supplement: supplementary_material [file a79310a0_problem.pdf › CompressARC/results_for_the_blog_post/plots_training/a79310a0_problem.pdf]

sample

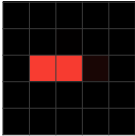

sample average

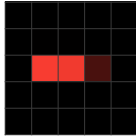

guess 1

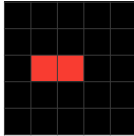

guess 2

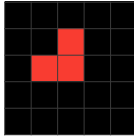

Supplement: supplementary_material [file a79310a0_solutions.pdf › CompressARC/results_for_the_blog_post/plots_training/a79310a0_solutions.pdf]

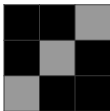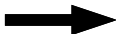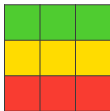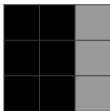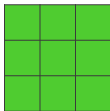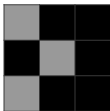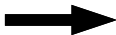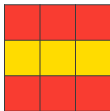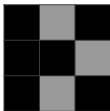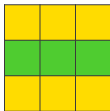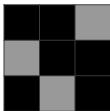

?

Supplement: supplementary_material [file a85d4709_problem.pdf › CompressARC/results_for_the_blog_post/plots_training/a85d4709_problem.pdf]

sample

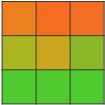

sample average

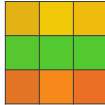

guess 1

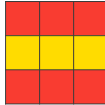

guess 2

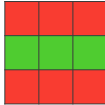

Supplement: supplementary_material [file a85d4709_solutions.pdf › CompressARC/results_for_the_blog_post/plots_training/a85d4709_solutions.pdf]

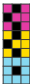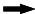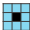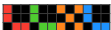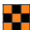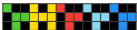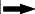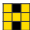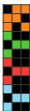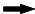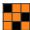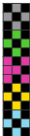

?

Supplement: supplementary_material [file a87f7484_problem.pdf › CompressARC/results_for_the_blog_post/plots_training/a87f7484_problem.pdf]

sample

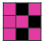

sample average

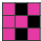

guess 1

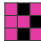

guess 2

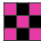

Supplement: supplementary_material [file a87f7484_solutions.pdf › CompressARC/results_for_the_blog_post/plots_training/a87f7484_solutions.pdf]

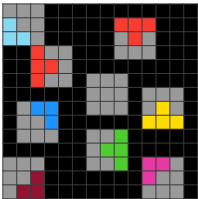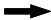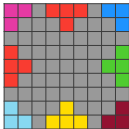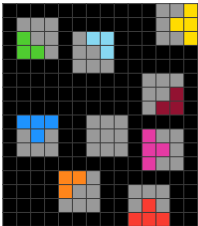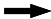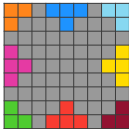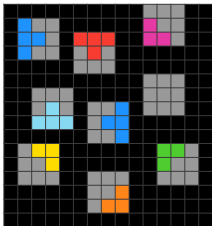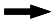

?

Supplement: supplementary_material [file a8c38be5_problem.pdf › CompressARC/results_for_the_blog_post/plots_training/a8c38be5_problem.pdf]

sample

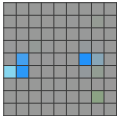

sample average

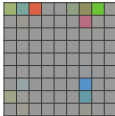

guess 1

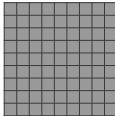

guess 2

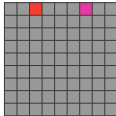

Supplement: supplementary_material [file a8c38be5_solutions.pdf › CompressARC/results_for_the_blog_post/plots_training/a8c38be5_solutions.pdf]

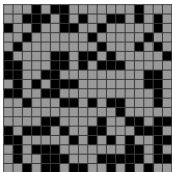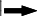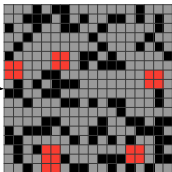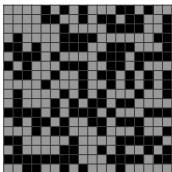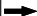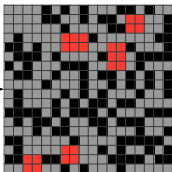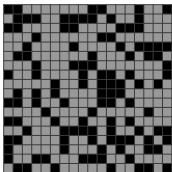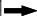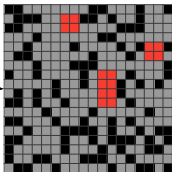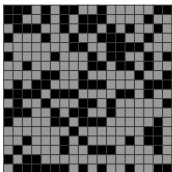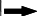

?

Supplement: supplementary_material [file a8d7556c_problem.pdf › CompressARC/results_for_the_blog_post/plots_training/a8d7556c_problem.pdf]

sample

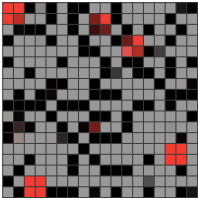

sample average

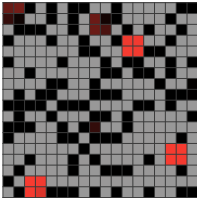

guess 1

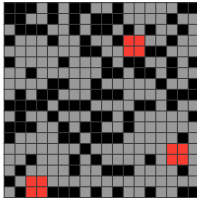

guess 2

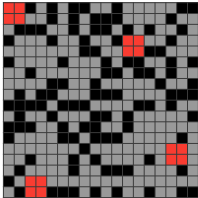

Supplement: supplementary_material [file a8d7556c_solutions.pdf › CompressARC/results_for_the_blog_post/plots_training/a8d7556c_solutions.pdf]

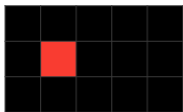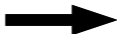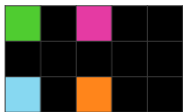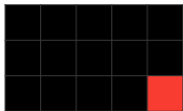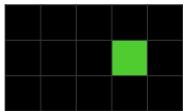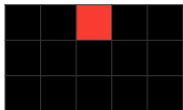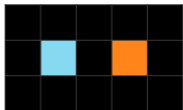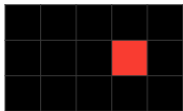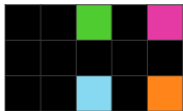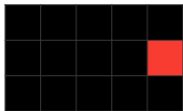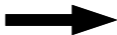

?

Supplement: supplementary_material [file a9f96cdd_problem.pdf › CompressARC/results_for_the_blog_post/plots_training/a9f96cdd_problem.pdf]

sample

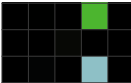

sample average

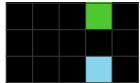

guess 1

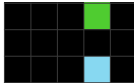

guess 2

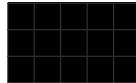

Supplement: supplementary_material [file a9f96cdd_solutions.pdf › CompressARC/results_for_the_blog_post/plots_training/a9f96cdd_solutions.pdf]

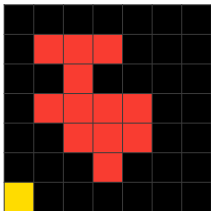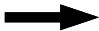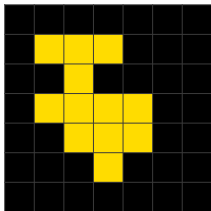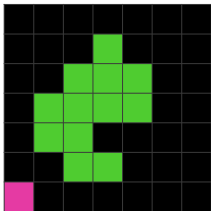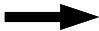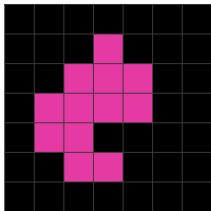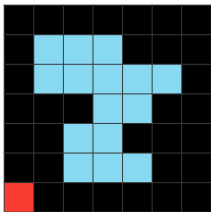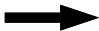

?

Supplement: supplementary_material [file aabf363d_problem.pdf › CompressARC/results_for_the_blog_post/plots_training/aabf363d_problem.pdf]

sample

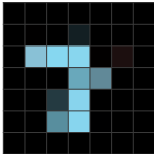

sample average

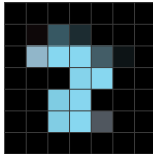

guess 1

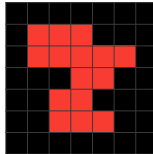

guess 2

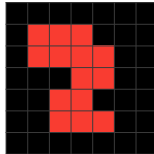

Supplement: supplementary_material [file aabf363d_solutions.pdf › CompressARC/results_for_the_blog_post/plots_training/aabf363d_solutions.pdf]

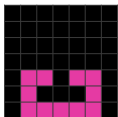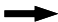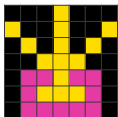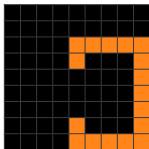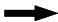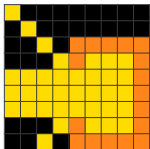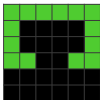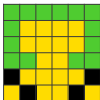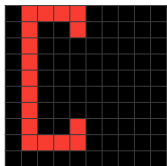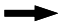

?

Supplement: supplementary_material [file aba27056_problem.pdf › CompressARC/results_for_the_blog_post/plots_training/aba27056_problem.pdf]

sample

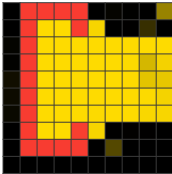

sample average

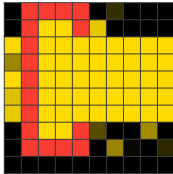

guess 1

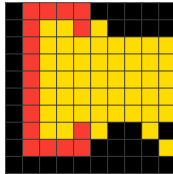

guess 2

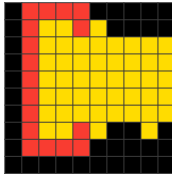

Supplement: supplementary_material [file aba27056_solutions.pdf › CompressARC/results_for_the_blog_post/plots_training/aba27056_solutions.pdf]

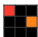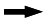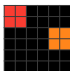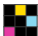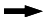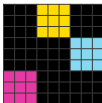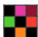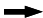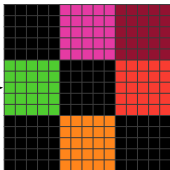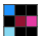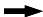

?

Supplement: supplementary_material [file ac0a08a4_problem.pdf › CompressARC/results_for_the_blog_post/plots_training/ac0a08a4_problem.pdf]

sample

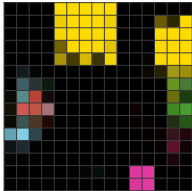

sample average

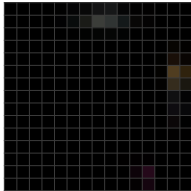

guess 1

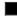

guess 2

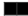

Supplement: supplementary_material [file ac0a08a4_solutions.pdf › CompressARC/results_for_the_blog_post/plots_training/ac0a08a4_solutions.pdf]

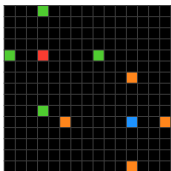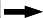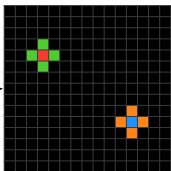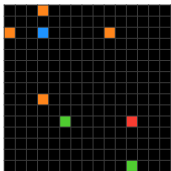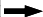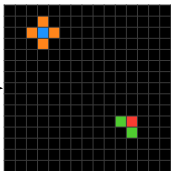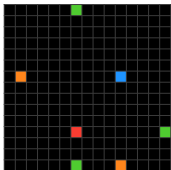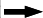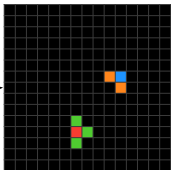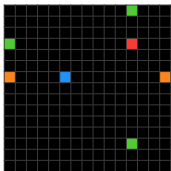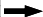

?

Supplement: supplementary_material [file ae3edfdc_problem.pdf › CompressARC/results_for_the_blog_post/plots_training/ae3edfdc_problem.pdf]

sample

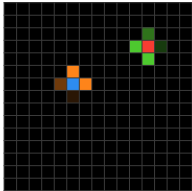

sample average

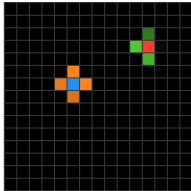

guess 1

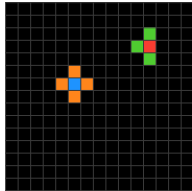

guess 2

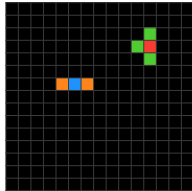

Supplement: supplementary_material [file ae3edfdc_solutions.pdf › CompressARC/results_for_the_blog_post/plots_training/ae3edfdc_solutions.pdf]

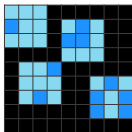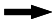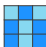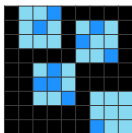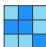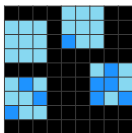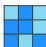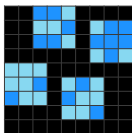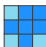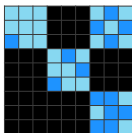

?

Supplement: supplementary_material [file ae4f1146_problem.pdf › CompressARC/results_for_the_blog_post/plots_training/ae4f1146_problem.pdf]

sample

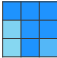

sample average

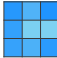

guess 1

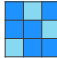

guess 2

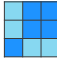

Supplement: supplementary_material [file ae4f1146_solutions.pdf › CompressARC/results_for_the_blog_post/plots_training/ae4f1146_solutions.pdf]

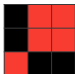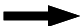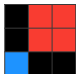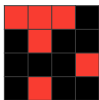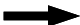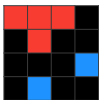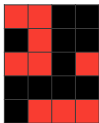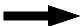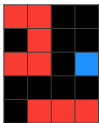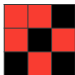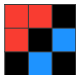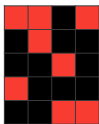

?

Supplement: supplementary_material [file aedd82e4_problem.pdf › CompressARC/results_for_the_blog_post/plots_training/aedd82e4_problem.pdf]

sample

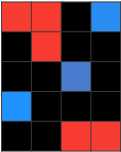

sample average

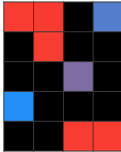

guess 1

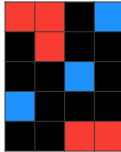

guess 2

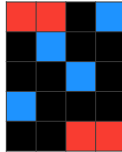

Supplement: supplementary_material [file aedd82e4_solutions.pdf › CompressARC/results_for_the_blog_post/plots_training/aedd82e4_solutions.pdf]

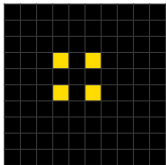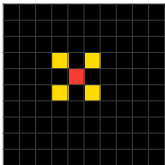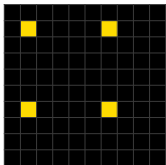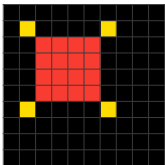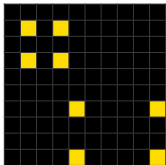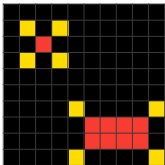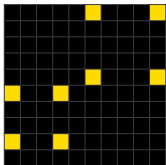

?

Supplement: supplementary_material [file af902bf9_problem.pdf › CompressARC/results_for_the_blog_post/plots_training/af902bf9_problem.pdf]

sample

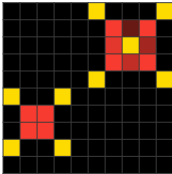

sample average

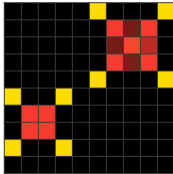

guess 1

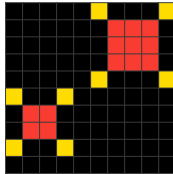

guess 2

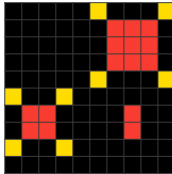

Supplement: supplementary_material [file af902bf9_solutions.pdf › CompressARC/results_for_the_blog_post/plots_training/af902bf9_solutions.pdf]

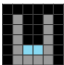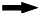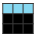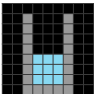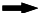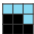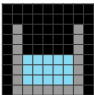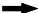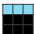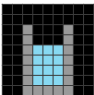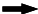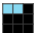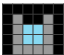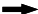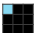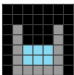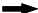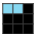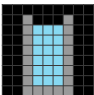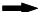

?

Supplement: supplementary_material [file b0c4d837_problem.pdf › CompressARC/results_for_the_blog_post/plots_training/b0c4d837_problem.pdf]

sample

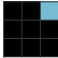

sample average

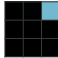

guess 1

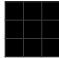

guess 2

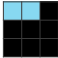

Supplement: supplementary_material [file b0c4d837_solutions.pdf › CompressARC/results_for_the_blog_post/plots_training/b0c4d837_solutions.pdf]

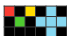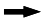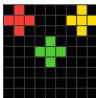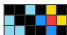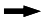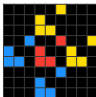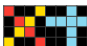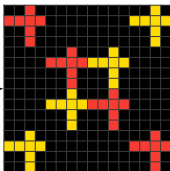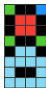

?

Supplement: supplementary_material [file b190f7f5_problem.pdf › CompressARC/results_for_the_blog_post/plots_training/b190f7f5_problem.pdf]

sample

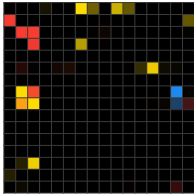

sample average

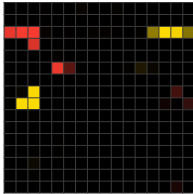

guess 1

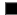

guess 2

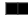

Supplement: supplementary_material [file b190f7f5_solutions.pdf › CompressARC/results_for_the_blog_post/plots_training/b190f7f5_solutions.pdf]

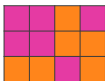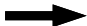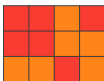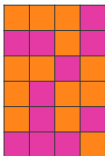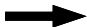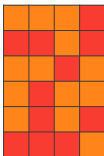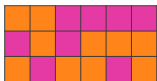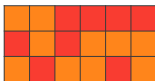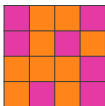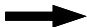

?

Supplement: supplementary_material [file b1948b0a_problem.pdf › CompressARC/results_for_the_blog_post/plots_training/b1948b0a_problem.pdf]

sample

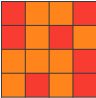

sample average

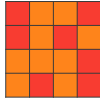

guess 1

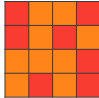

guess 2

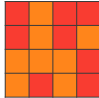

Supplement: supplementary_material [file b1948b0a_solutions.pdf › CompressARC/results_for_the_blog_post/plots_training/b1948b0a_solutions.pdf]

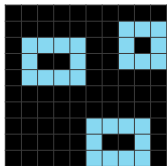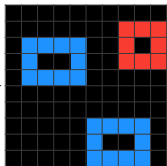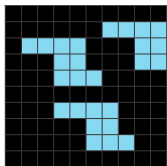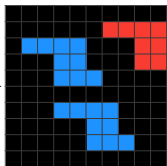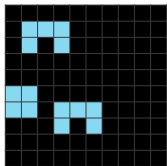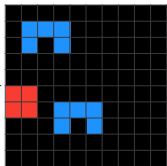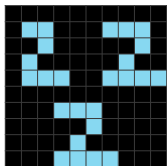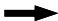

?

Supplement: supplementary_material [file b230c067_problem.pdf › CompressARC/results_for_the_blog_post/plots_training/b230c067_problem.pdf]

sample

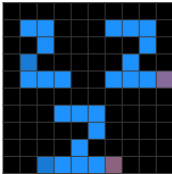

sample average

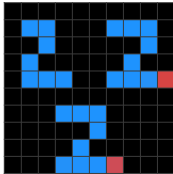

guess 1

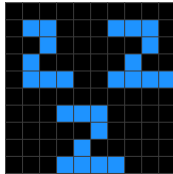

guess 2

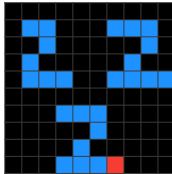

Supplement: supplementary_material [file b230c067_solutions.pdf › CompressARC/results_for_the_blog_post/plots_training/b230c067_solutions.pdf]

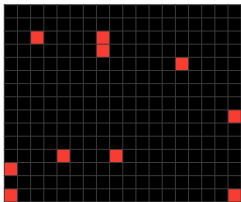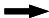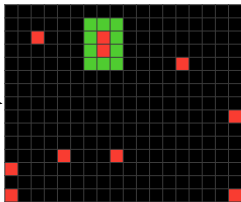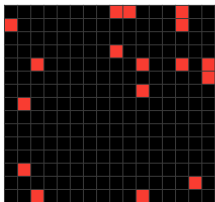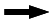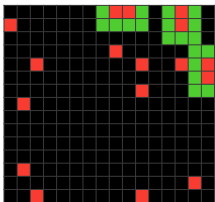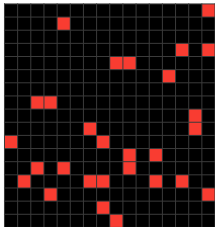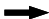

?

Supplement: supplementary_material [file b27ca6d3_problem.pdf › CompressARC/results_for_the_blog_post/plots_training/b27ca6d3_problem.pdf]

sample

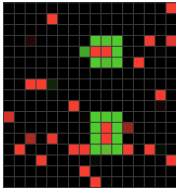

sample average

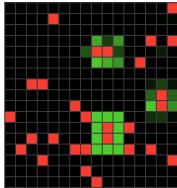

guess 1

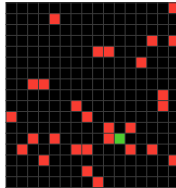

guess 2

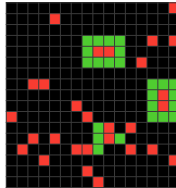

Supplement: supplementary_material [file b27ca6d3_solutions.pdf › CompressARC/results_for_the_blog_post/plots_training/b27ca6d3_solutions.pdf]

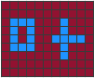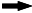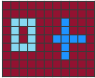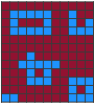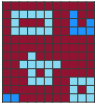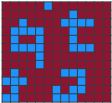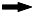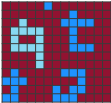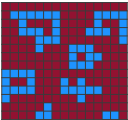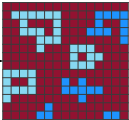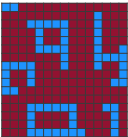

?

Supplement: supplementary_material [file b2862040_problem.pdf › CompressARC/results_for_the_blog_post/plots_training/b2862040_problem.pdf]

sample

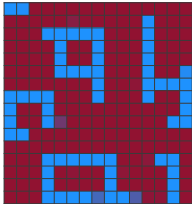

sample average

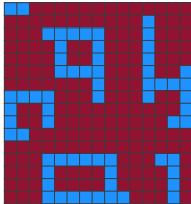

guess 1

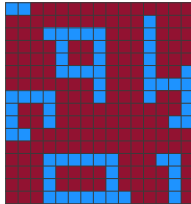

guess 2

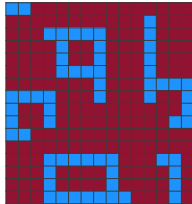

Supplement: supplementary_material [file b2862040_solutions.pdf › CompressARC/results_for_the_blog_post/plots_training/b2862040_solutions.pdf]

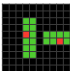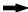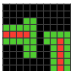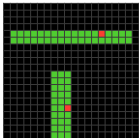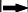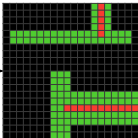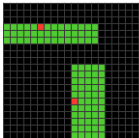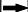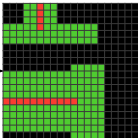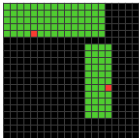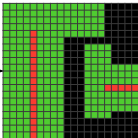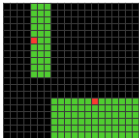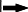

?

Supplement: supplementary_material [file b527c5c6_problem.pdf › CompressARC/results_for_the_blog_post/plots_training/b527c5c6_problem.pdf]

sample

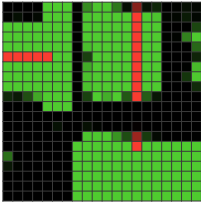

sample average

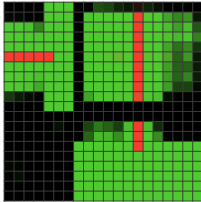

guess 1

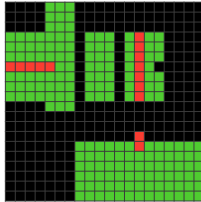

guess 2

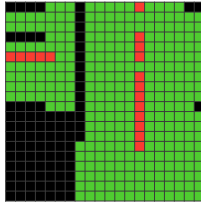

Supplement: supplementary_material [file b527c5c6_solutions.pdf › CompressARC/results_for_the_blog_post/plots_training/b527c5c6_solutions.pdf]

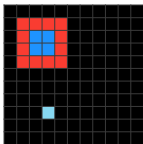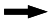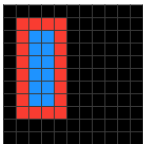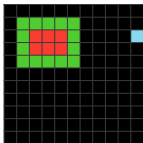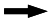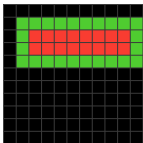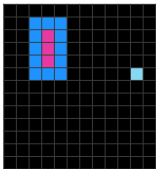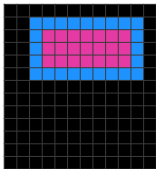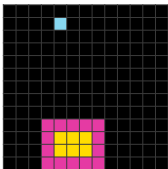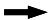

?

Supplement: supplementary_material [file b548a754_problem.pdf › CompressARC/results_for_the_blog_post/plots_training/b548a754_problem.pdf]

sample

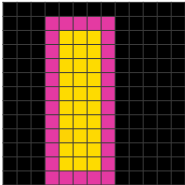

sample average

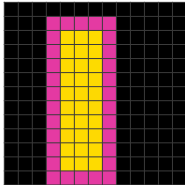

guess 1

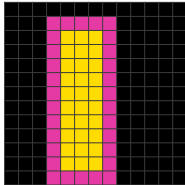

guess 2

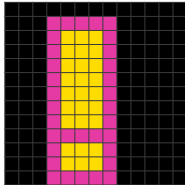

Supplement: supplementary_material [file b548a754_solutions.pdf › CompressARC/results_for_the_blog_post/plots_training/b548a754_solutions.pdf]

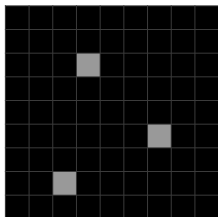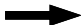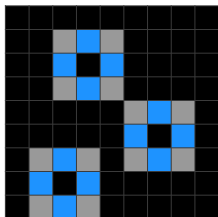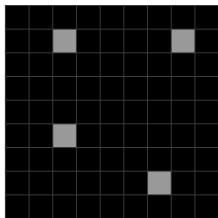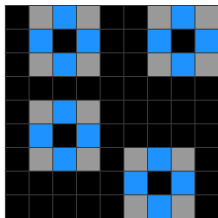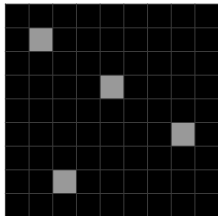

?

Supplement: supplementary_material [file b60334d2_problem.pdf › CompressARC/results_for_the_blog_post/plots_training/b60334d2_problem.pdf]

sample

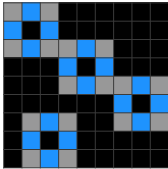

sample average

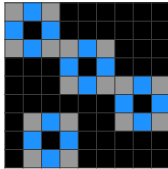

guess 1

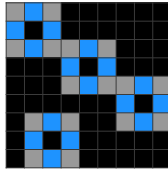

guess 2

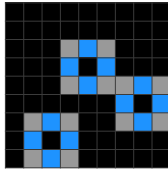

Supplement: supplementary_material [file b60334d2_solutions.pdf › CompressARC/results_for_the_blog_post/plots_training/b60334d2_solutions.pdf]

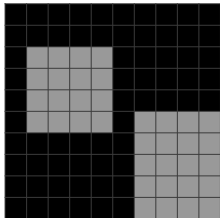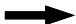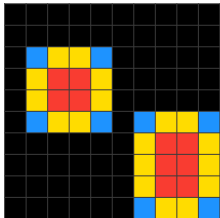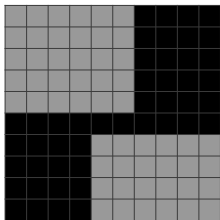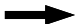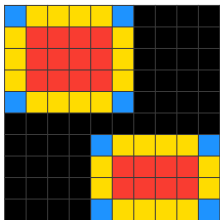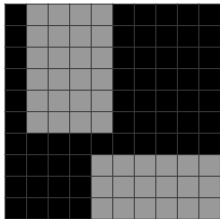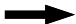

?

Supplement: supplementary_material [file b6afb2da_problem.pdf › CompressARC/results_for_the_blog_post/plots_training/b6afb2da_problem.pdf]

sample

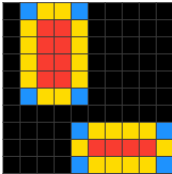

sample average

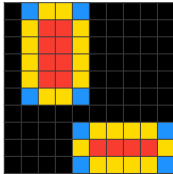

guess 1

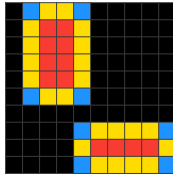

guess 2

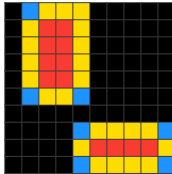

Supplement: supplementary_material [file b6afb2da_solutions.pdf › CompressARC/results_for_the_blog_post/plots_training/b6afb2da_solutions.pdf]

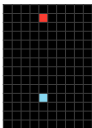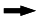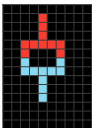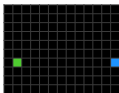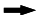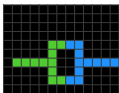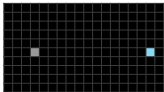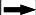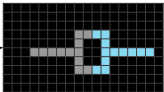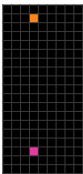

?

Supplement: supplementary_material [file b7249182_problem.pdf › CompressARC/results_for_the_blog_post/plots_training/b7249182_problem.pdf]

sample

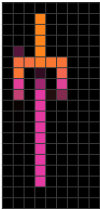

sample average

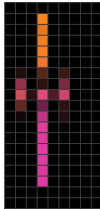

guess 1

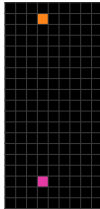

guess 2

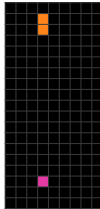

Supplement: supplementary_material [file b7249182_solutions.pdf › CompressARC/results_for_the_blog_post/plots_training/b7249182_solutions.pdf]

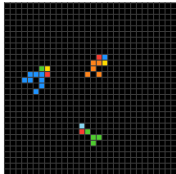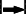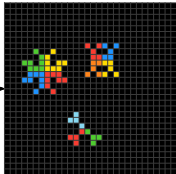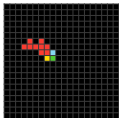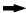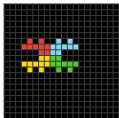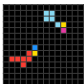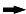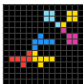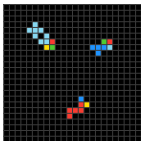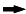

?

Supplement: supplementary_material [file b775ac94_problem.pdf › CompressARC/results_for_the_blog_post/plots_training/b775ac94_problem.pdf]

sample

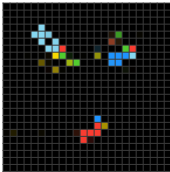

sample average

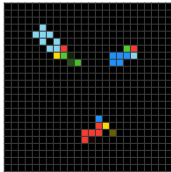

guess 1

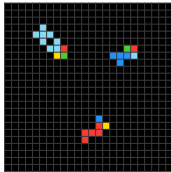

guess 2

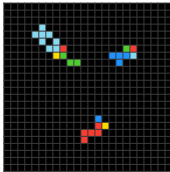

Supplement: supplementary_material [file b775ac94_solutions.pdf › CompressARC/results_for_the_blog_post/plots_training/b775ac94_solutions.pdf]

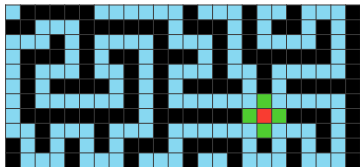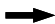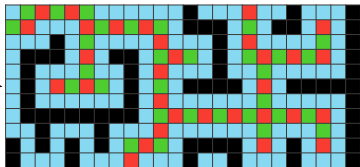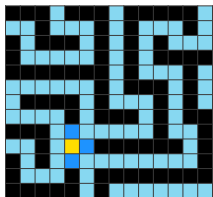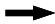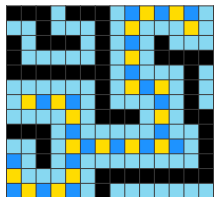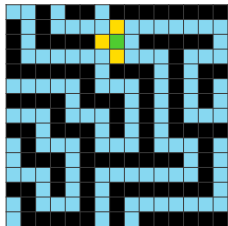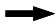

?

Supplement: supplementary_material [file b782dc8a_problem.pdf › CompressARC/results_for_the_blog_post/plots_training/b782dc8a_problem.pdf]

sample

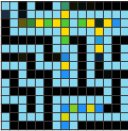

sample average

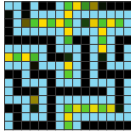

guess 1

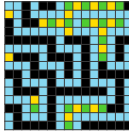

guess 2

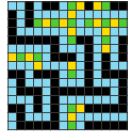

Supplement: supplementary_material [file b782dc8a_solutions.pdf › CompressARC/results_for_the_blog_post/plots_training/b782dc8a_solutions.pdf]

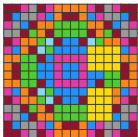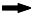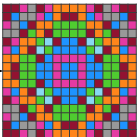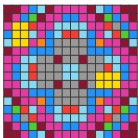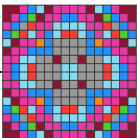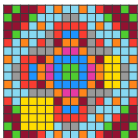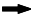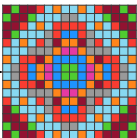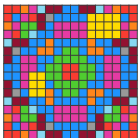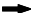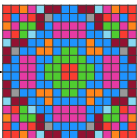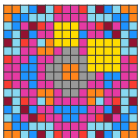

?

Supplement: supplementary_material [file b8825c91_problem.pdf › CompressARC/results_for_the_blog_post/plots_training/b8825c91_problem.pdf]

sample

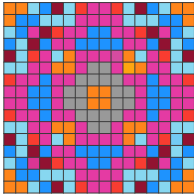

sample average

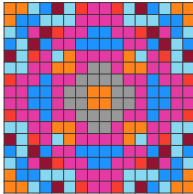

guess 1

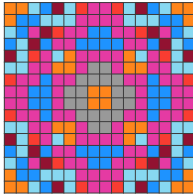

guess 2

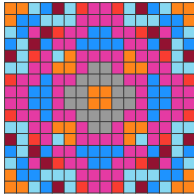

Supplement: supplementary_material [file b8825c91_solutions.pdf › CompressARC/results_for_the_blog_post/plots_training/b8825c91_solutions.pdf]

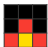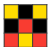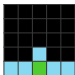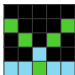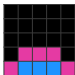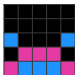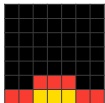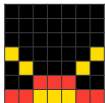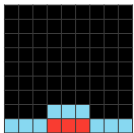

?

Supplement: supplementary_material [file b8cdaf2b_problem.pdf › CompressARC/results_for_the_blog_post/plots_training/b8cdaf2b_problem.pdf]

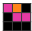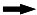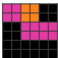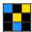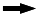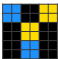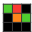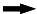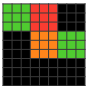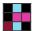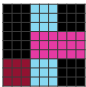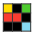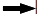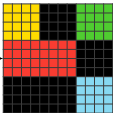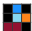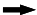

?

Supplement: supplementary_material [file b91ae062_problem.pdf › CompressARC/results_for_the_blog_post/plots_training/b91ae062_problem.pdf]

sample

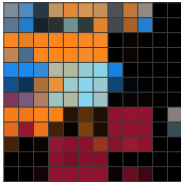

sample average

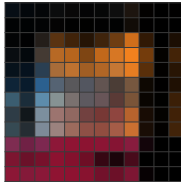

guess 1

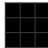

guess 2

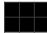

Supplement: supplementary_material [file b91ae062_solutions.pdf › CompressARC/results_for_the_blog_post/plots_training/b91ae062_solutions.pdf]

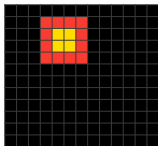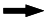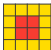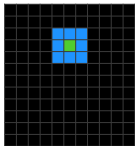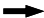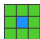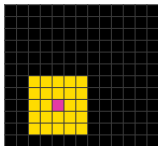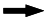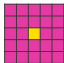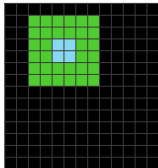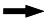

?

Supplement: supplementary_material [file b94a9452_problem.pdf › CompressARC/results_for_the_blog_post/plots_training/b94a9452_problem.pdf]

sample

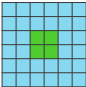

sample average

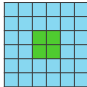

guess 1

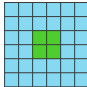

guess 2

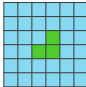

Supplement: supplementary_material [file b94a9452_solutions.pdf › CompressARC/results_for_the_blog_post/plots_training/b94a9452_solutions.pdf]

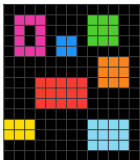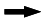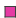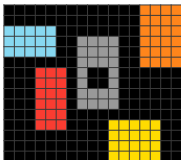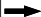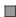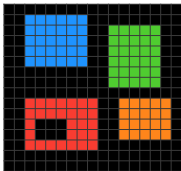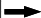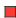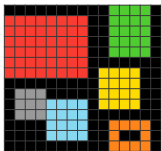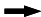

?

Supplement: supplementary_material [file b9b7f026_problem.pdf › CompressARC/results_for_the_blog_post/plots_training/b9b7f026_problem.pdf]

sample

sample average

guess 1

guess 2

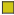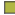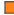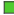

Supplement: supplementary_material [file b9b7f026_solutions.pdf › CompressARC/results_for_the_blog_post/plots_training/b9b7f026_solutions.pdf]

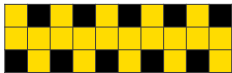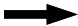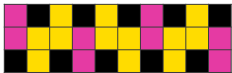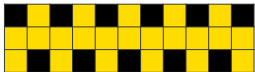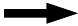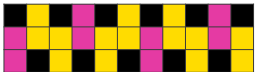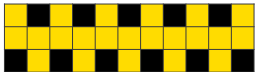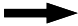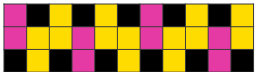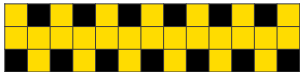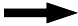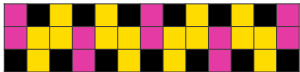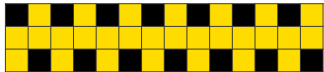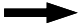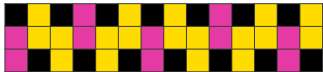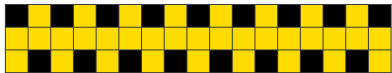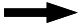

?

Supplement: supplementary_material [file ba26e723_problem.pdf › CompressARC/results_for_the_blog_post/plots_training/ba26e723_problem.pdf]

sample

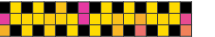

sample average

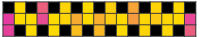

guess 1

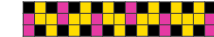

guess 2

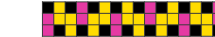

Supplement: supplementary_material [file ba26e723_solutions.pdf › CompressARC/results_for_the_blog_post/plots_training/ba26e723_solutions.pdf]

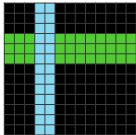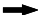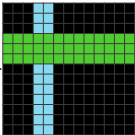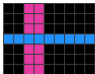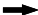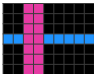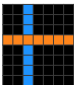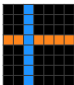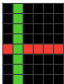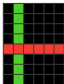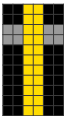

?

Supplement: supplementary_material [file ba97ae07_problem.pdf › CompressARC/results_for_the_blog_post/plots_training/ba97ae07_problem.pdf]

sample

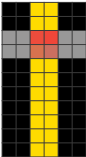

sample average

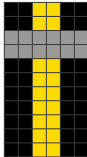

guess 1

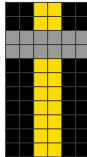

guess 2

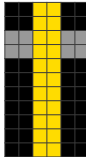

Supplement: supplementary_material [file ba97ae07_solutions.pdf › CompressARC/results_for_the_blog_post/plots_training/ba97ae07_solutions.pdf]

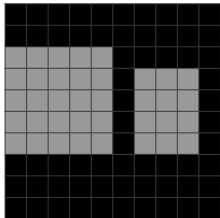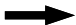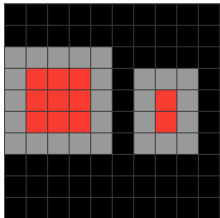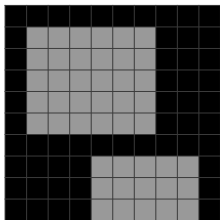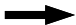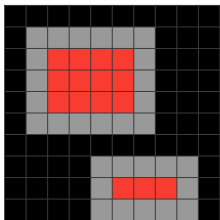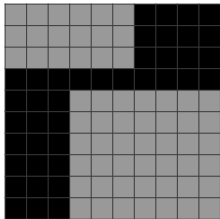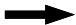

?

Supplement: supplementary_material [file bb43febb_problem.pdf › CompressARC/results_for_the_blog_post/plots_training/bb43febb_problem.pdf]

sample

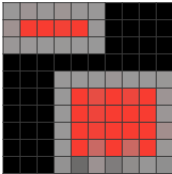

sample average

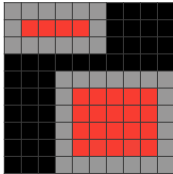

guess 1

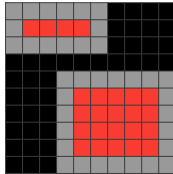

guess 2

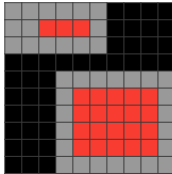

Supplement: supplementary_material [file bb43febb_solutions.pdf › CompressARC/results_for_the_blog_post/plots_training/bb43febb_solutions.pdf]

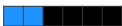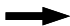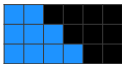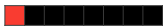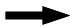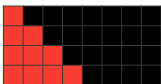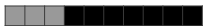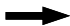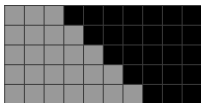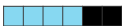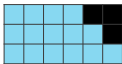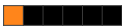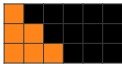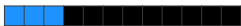

?

Supplement: supplementary_material [file bbc9ae5d_problem.pdf › CompressARC/results_for_the_blog_post/plots_training/bbc9ae5d_problem.pdf]

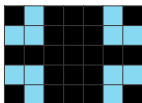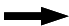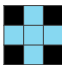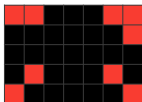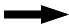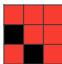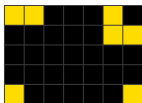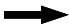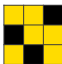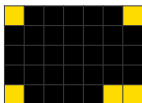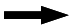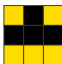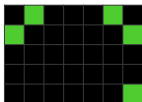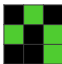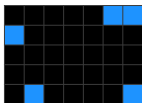

?

Supplement: supplementary_material [file bc1d5164_problem.pdf › CompressARC/results_for_the_blog_post/plots_training/bc1d5164_problem.pdf]

sample

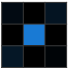

sample average

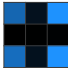

guess 1

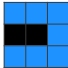

guess 2

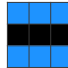

Supplement: supplementary_material [file bc1d5164_solutions.pdf › CompressARC/results_for_the_blog_post/plots_training/bc1d5164_solutions.pdf]

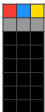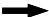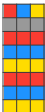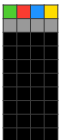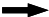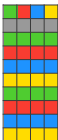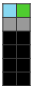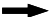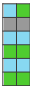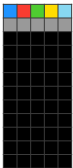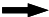

?

Supplement: supplementary_material [file bd4472b8_problem.pdf › CompressARC/results_for_the_blog_post/plots_training/bd4472b8_problem.pdf]

sample

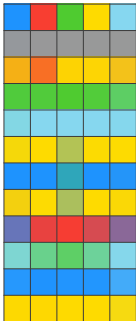

sample average

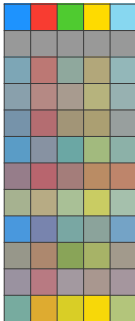

guess 1

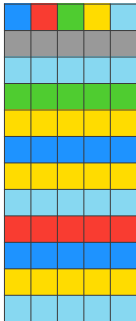

guess 2

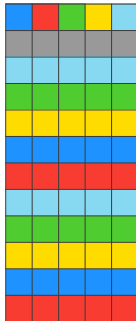

Supplement: supplementary_material [file bd4472b8_solutions.pdf › CompressARC/results_for_the_blog_post/plots_training/bd4472b8_solutions.pdf]

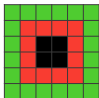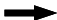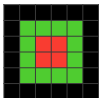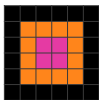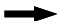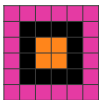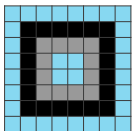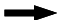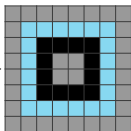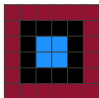

?

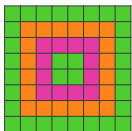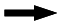

?

Supplement: supplementary_material [file bda2d7a6_problem.pdf › CompressARC/results_for_the_blog_post/plots_training/bda2d7a6_problem.pdf]

sample

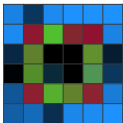

sample average

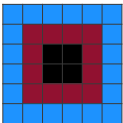

guess 1

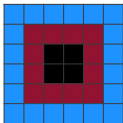

guess 2

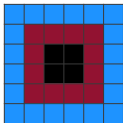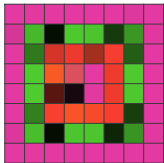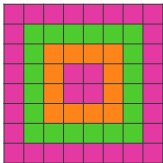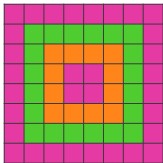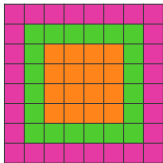

Supplement: supplementary_material [file bda2d7a6_solutions.pdf › CompressARC/results_for_the_blog_post/plots_training/bda2d7a6_solutions.pdf]

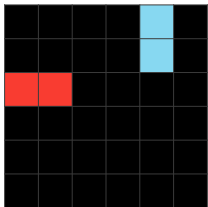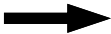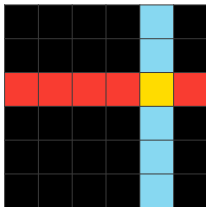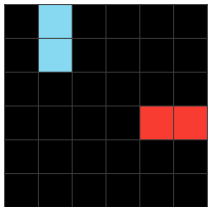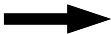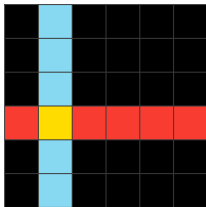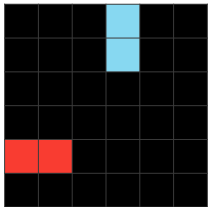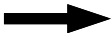

?

Supplement: supplementary_material [file bdad9b1f_problem.pdf › CompressARC/results_for_the_blog_post/plots_training/bdad9b1f_problem.pdf]

sample

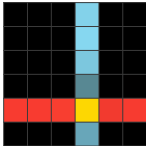

sample average

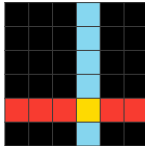

guess 1

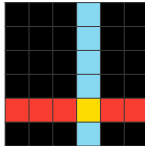

guess 2

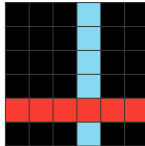

Supplement: supplementary_material [file bdad9b1f_solutions.pdf › CompressARC/results_for_the_blog_post/plots_training/bdad9b1f_solutions.pdf]

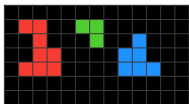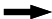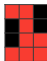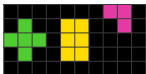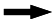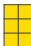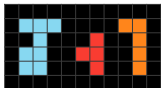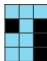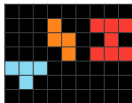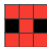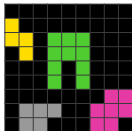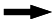

?

Supplement: supplementary_material [file be94b721_problem.pdf › CompressARC/results_for_the_blog_post/plots_training/be94b721_problem.pdf]

sample

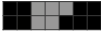

sample average

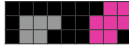

guess 1

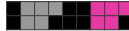

guess 2

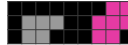

Supplement: supplementary_material [file be94b721_solutions.pdf › CompressARC/results_for_the_blog_post/plots_training/be94b721_solutions.pdf]

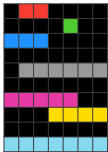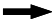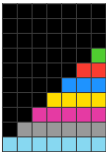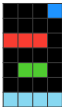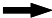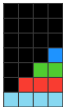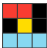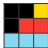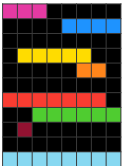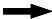

?

Supplement: supplementary_material [file beb8660c_problem.pdf › CompressARC/results_for_the_blog_post/plots_training/beb8660c_problem.pdf]

sample

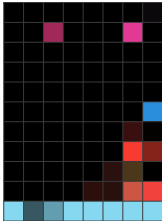

sample average

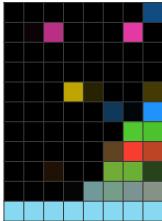

guess 1

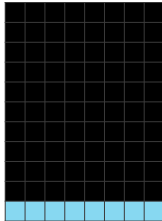

guess 2

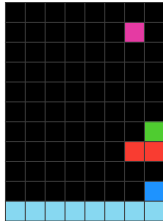

Supplement: supplementary_material [file beb8660c_solutions.pdf › CompressARC/results_for_the_blog_post/plots_training/beb8660c_solutions.pdf]

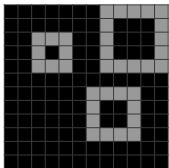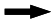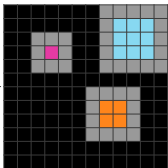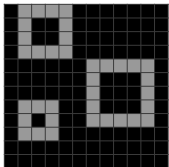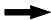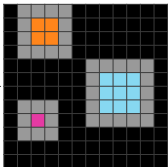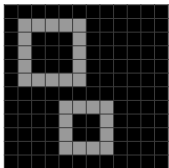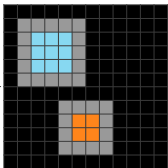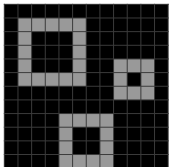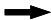

?

Supplement: supplementary_material [file c0f76784_problem.pdf › CompressARC/results_for_the_blog_post/plots_training/c0f76784_problem.pdf]

sample

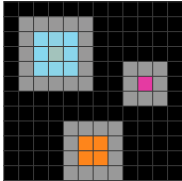

sample average

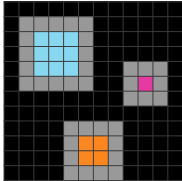

guess 1

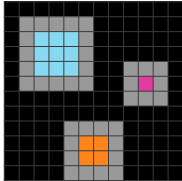

guess 2

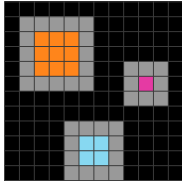

Supplement: supplementary_material [file c0f76784_solutions.pdf › CompressARC/results_for_the_blog_post/plots_training/c0f76784_solutions.pdf]

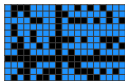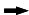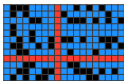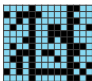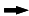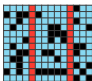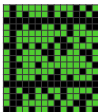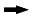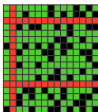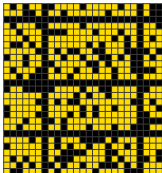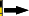

?

Supplement: supplementary_material [file c1d99e64_problem.pdf › CompressARC/results_for_the_blog_post/plots_training/c1d99e64_problem.pdf]

sample

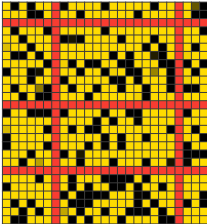

sample average

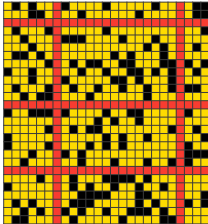

guess 1

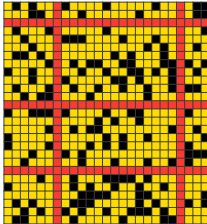

guess 2

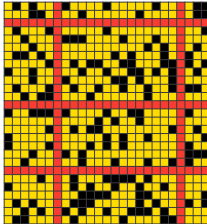

Supplement: supplementary_material [file c1d99e64_solutions.pdf › CompressARC/results_for_the_blog_post/plots_training/c1d99e64_solutions.pdf]

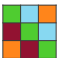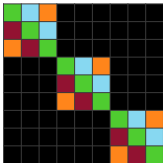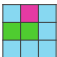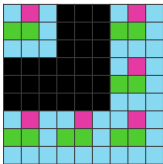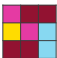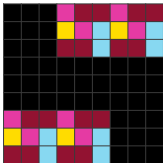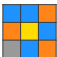

?

Supplement: supplementary_material [file c3e719e8_problem.pdf › CompressARC/results_for_the_blog_post/plots_training/c3e719e8_problem.pdf]
