# Supplementary material (part 16 of 17)
Source: ML conference proceedings conference paper supplement (https://openreview.net/forum?id=jLC662Yo5h)

sample

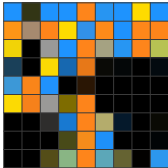

sample average

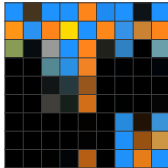

guess 1

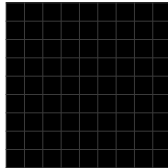

guess 2

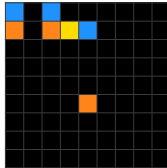

Supplement: supplementary_material [file c3e719e8_solutions.pdf › CompressARC/results_for_the_blog_post/plots_training/c3e719e8_solutions.pdf]

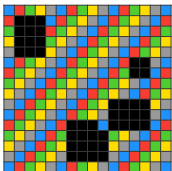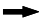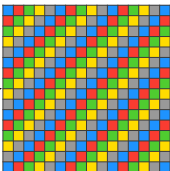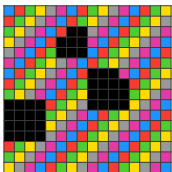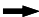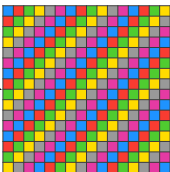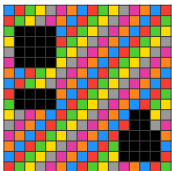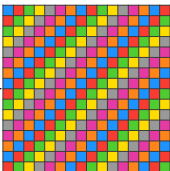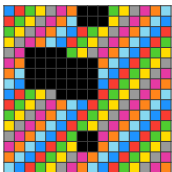

?

Supplement: supplementary_material [file c3f564a4_problem.pdf › CompressARC/results_for_the_blog_post/plots_training/c3f564a4_problem.pdf]

sample

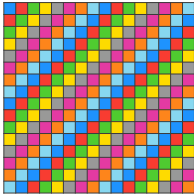

sample average

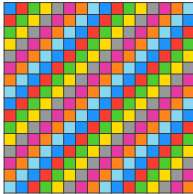

guess 1

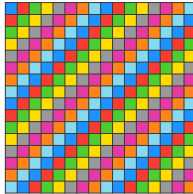

guess 2

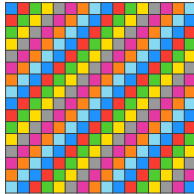

Supplement: supplementary_material [file c3f564a4_solutions.pdf › CompressARC/results_for_the_blog_post/plots_training/c3f564a4_solutions.pdf]

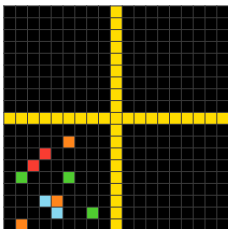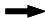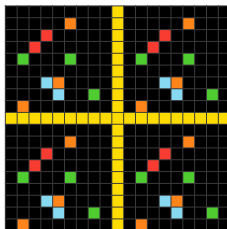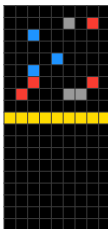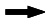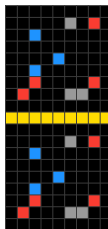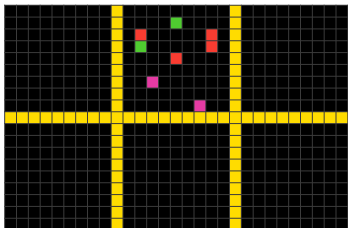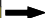

?

Supplement: supplementary_material [file c444b776_problem.pdf › CompressARC/results_for_the_blog_post/plots_training/c444b776_problem.pdf]

sample

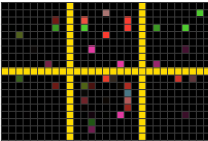

sample average

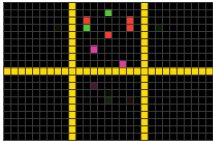

guess 1

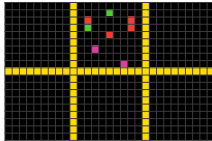

guess 2

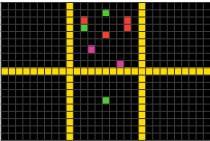

Supplement: supplementary_material [file c444b776_solutions.pdf › CompressARC/results_for_the_blog_post/plots_training/c444b776_solutions.pdf]

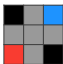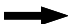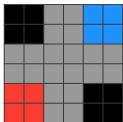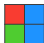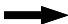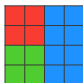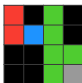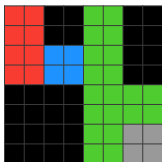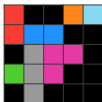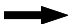

?

Supplement: supplementary_material [file c59eb873_problem.pdf › CompressARC/results_for_the_blog_post/plots_training/c59eb873_problem.pdf]

sample

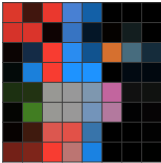

sample average

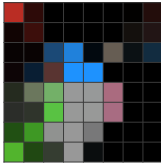

guess 1

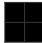

guess 2

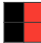

Supplement: supplementary_material [file c59eb873_solutions.pdf › CompressARC/results_for_the_blog_post/plots_training/c59eb873_solutions.pdf]

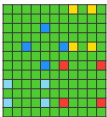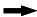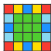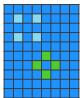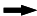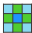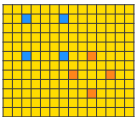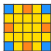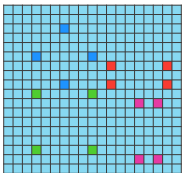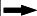

?

Supplement: supplementary_material [file c8cbb738_problem.pdf › CompressARC/results_for_the_blog_post/plots_training/c8cbb738_problem.pdf]

sample

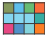

sample average

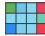

guess 1

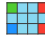

guess 2

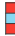

Supplement: supplementary_material [file c8cbb738_solutions.pdf › CompressARC/results_for_the_blog_post/plots_training/c8cbb738_solutions.pdf]

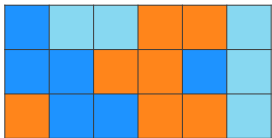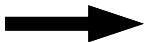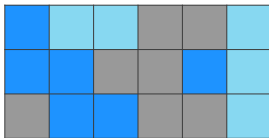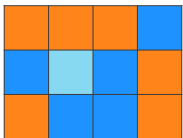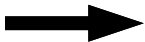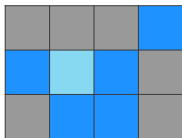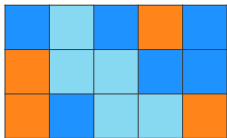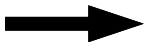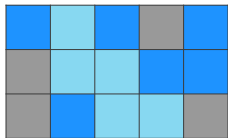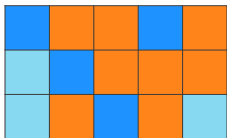

?

Supplement: supplementary_material [file c8f0f002_problem.pdf › CompressARC/results_for_the_blog_post/plots_training/c8f0f002_problem.pdf]

sample

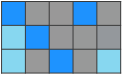

sample average

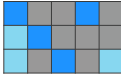

guess 1

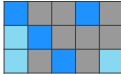

guess 2

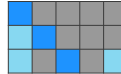

Supplement: supplementary_material [file c8f0f002_solutions.pdf › CompressARC/results_for_the_blog_post/plots_training/c8f0f002_solutions.pdf]

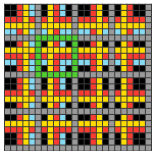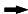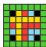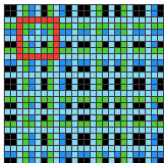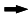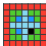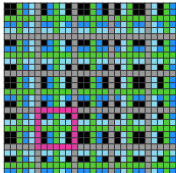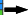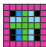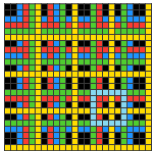

?

Supplement: supplementary_material [file c909285e_problem.pdf › CompressARC/results_for_the_blog_post/plots_training/c909285e_problem.pdf]

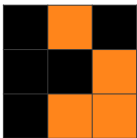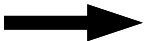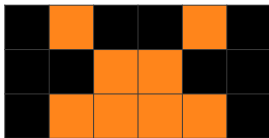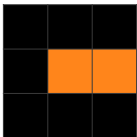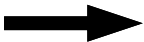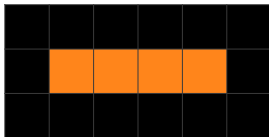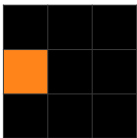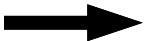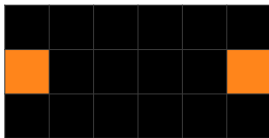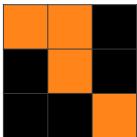

?

Supplement: supplementary_material [file c9e6f938_problem.pdf › CompressARC/results_for_the_blog_post/plots_training/c9e6f938_problem.pdf]

sample

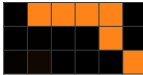

sample average

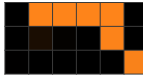

guess 1

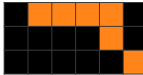

guess 2

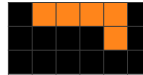

Supplement: supplementary_material [file c9e6f938_solutions.pdf › CompressARC/results_for_the_blog_post/plots_training/c9e6f938_solutions.pdf]

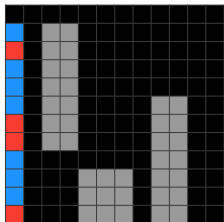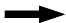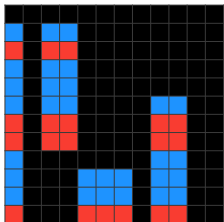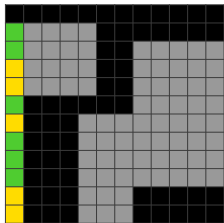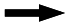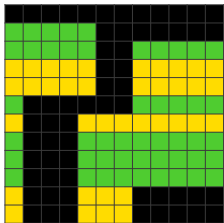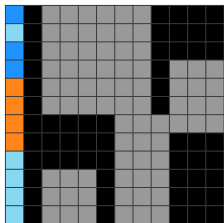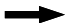

?

Supplement: supplementary_material [file c9f8e694_problem.pdf › CompressARC/results_for_the_blog_post/plots_training/c9f8e694_problem.pdf]

sample

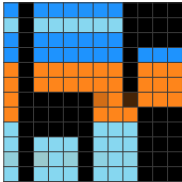

sample average

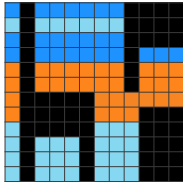

guess 1

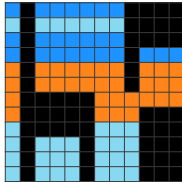

guess 2

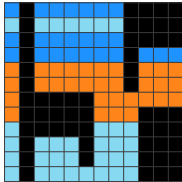

Supplement: supplementary_material [file c9f8e694_solutions.pdf › CompressARC/results_for_the_blog_post/plots_training/c9f8e694_solutions.pdf]

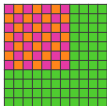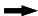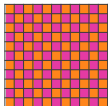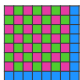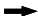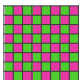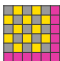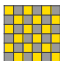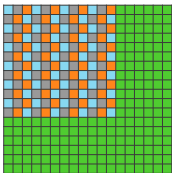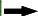

?

Supplement: supplementary_material [file caa06a1f_problem.pdf › CompressARC/results_for_the_blog_post/plots_training/caa06a1f_problem.pdf]

sample

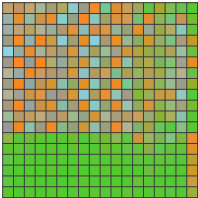

sample average

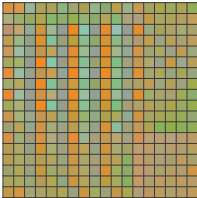

guess 1

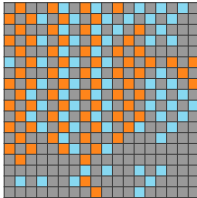

guess 2

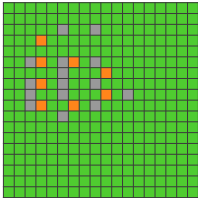

Supplement: supplementary_material [file caa06a1f_solutions.pdf › CompressARC/results_for_the_blog_post/plots_training/caa06a1f_solutions.pdf]

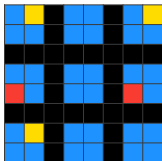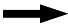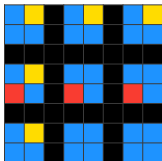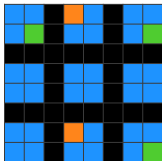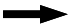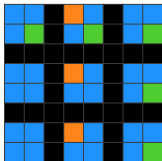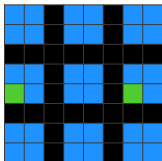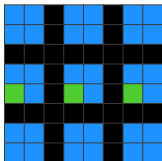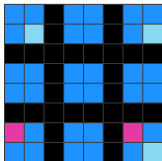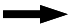

?

Supplement: supplementary_material [file cbded52d_problem.pdf › CompressARC/results_for_the_blog_post/plots_training/cbded52d_problem.pdf]

sample

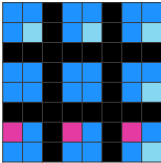

sample average

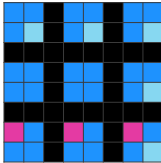

guess 1

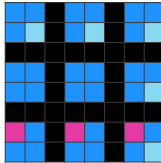

guess 2

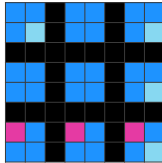

Supplement: supplementary_material [file cbded52d_solutions.pdf › CompressARC/results_for_the_blog_post/plots_training/cbded52d_solutions.pdf]

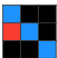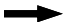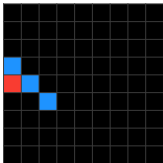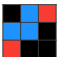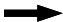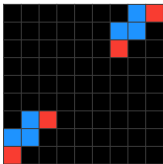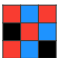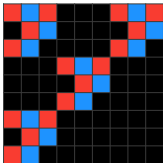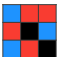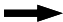

?

Supplement: supplementary_material [file cce03e0d_problem.pdf › CompressARC/results_for_the_blog_post/plots_training/cce03e0d_problem.pdf]

sample

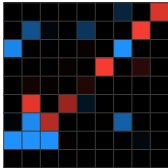

sample average

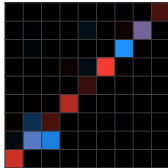

guess 1

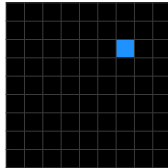

guess 2

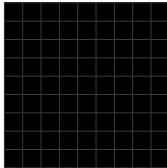

Supplement: supplementary_material [file cce03e0d_solutions.pdf › CompressARC/results_for_the_blog_post/plots_training/cce03e0d_solutions.pdf]

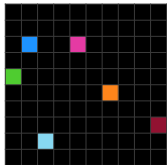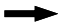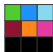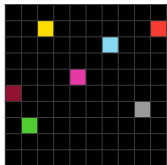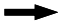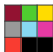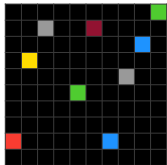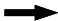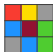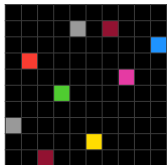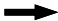

?

Supplement: supplementary_material [file cdecee7f_problem.pdf › CompressARC/results_for_the_blog_post/plots_training/cdecee7f_problem.pdf]

sample

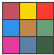

sample average

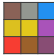

guess 1

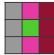

guess 2

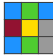

Supplement: supplementary_material [file cdecee7f_solutions.pdf › CompressARC/results_for_the_blog_post/plots_training/cdecee7f_solutions.pdf]

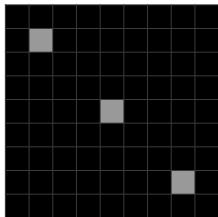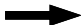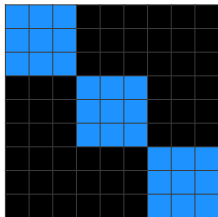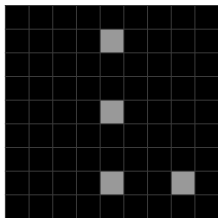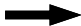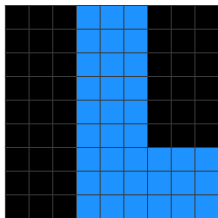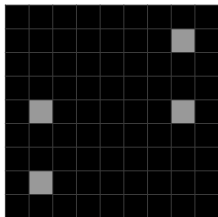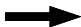

?

Supplement: supplementary_material [file ce22a75a_problem.pdf › CompressARC/results_for_the_blog_post/plots_training/ce22a75a_problem.pdf]

sample

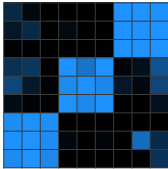

sample average

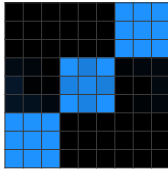

guess 1

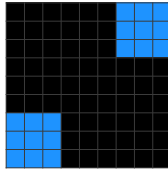

guess 2

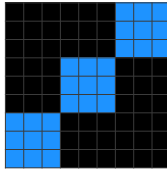

Supplement: supplementary_material [file ce22a75a_solutions.pdf › CompressARC/results_for_the_blog_post/plots_training/ce22a75a_solutions.pdf]

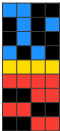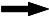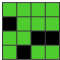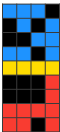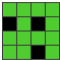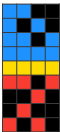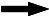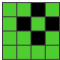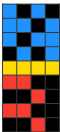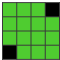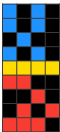

?

Supplement: supplementary_material [file ce4f8723_problem.pdf › CompressARC/results_for_the_blog_post/plots_training/ce4f8723_problem.pdf]

sample

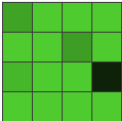

sample average

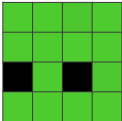

guess 1

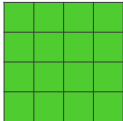

guess 2

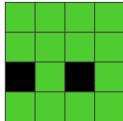

Supplement: supplementary_material [file ce4f8723_solutions.pdf › CompressARC/results_for_the_blog_post/plots_training/ce4f8723_solutions.pdf]

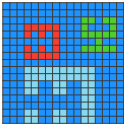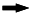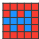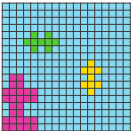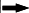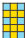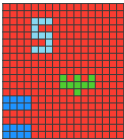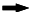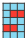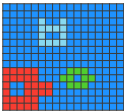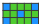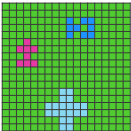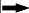

?

Supplement: supplementary_material [file ce602527_problem.pdf › CompressARC/results_for_the_blog_post/plots_training/ce602527_problem.pdf]

sample

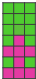

sample average

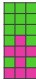

guess 1

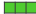

guess 2

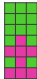

Supplement: supplementary_material [file ce602527_solutions.pdf › CompressARC/results_for_the_blog_post/plots_training/ce602527_solutions.pdf]

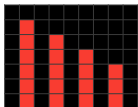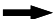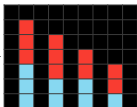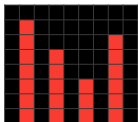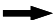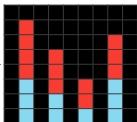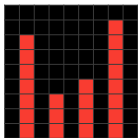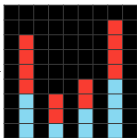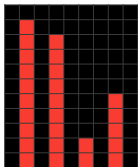

?

Supplement: supplementary_material [file ce9e57f2_problem.pdf › CompressARC/results_for_the_blog_post/plots_training/ce9e57f2_problem.pdf]

sample

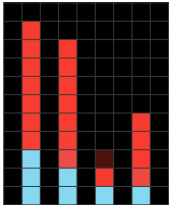

sample average

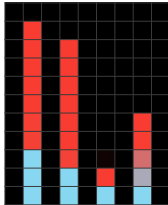

guess 1

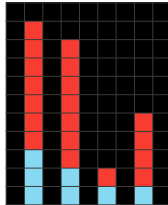

guess 2

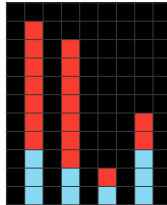

Supplement: supplementary_material [file ce9e57f2_solutions.pdf › CompressARC/results_for_the_blog_post/plots_training/ce9e57f2_solutions.pdf]

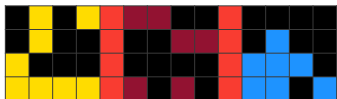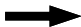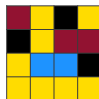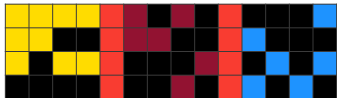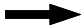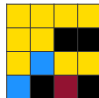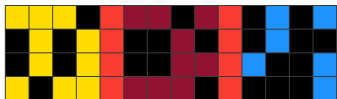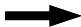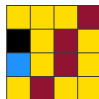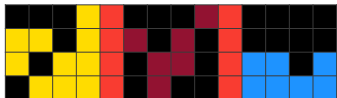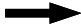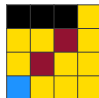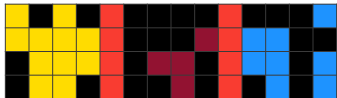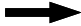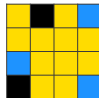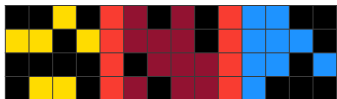

?

Supplement: supplementary_material [file cf98881b_problem.pdf › CompressARC/results_for_the_blog_post/plots_training/cf98881b_problem.pdf]

sample

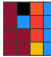

sample average

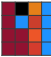

guess 1

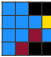

guess 2

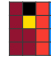

Supplement: supplementary_material [file cf98881b_solutions.pdf › CompressARC/results_for_the_blog_post/plots_training/cf98881b_solutions.pdf]

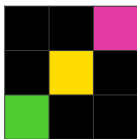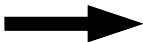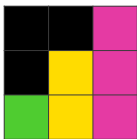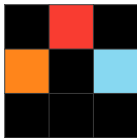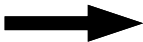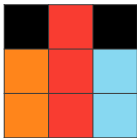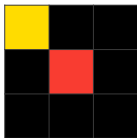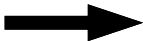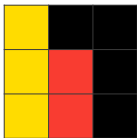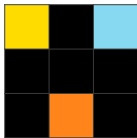

?

Supplement: supplementary_material [file d037b0a7_problem.pdf › CompressARC/results_for_the_blog_post/plots_training/d037b0a7_problem.pdf]

sample

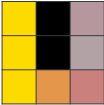

sample average

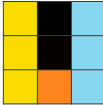

guess 1

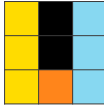

guess 2

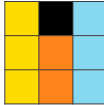

Supplement: supplementary_material [file d037b0a7_solutions.pdf › CompressARC/results_for_the_blog_post/plots_training/d037b0a7_solutions.pdf]

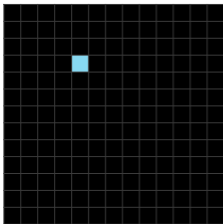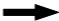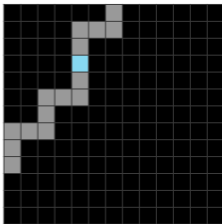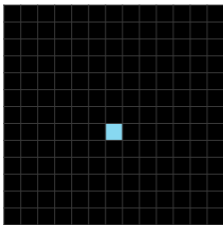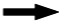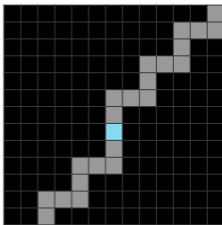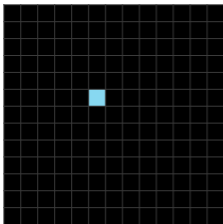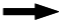

?

Supplement: supplementary_material [file d06dbe63_problem.pdf › CompressARC/results_for_the_blog_post/plots_training/d06dbe63_problem.pdf]

sample

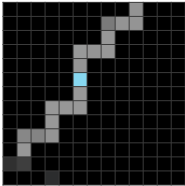

sample average

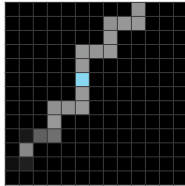

guess 1

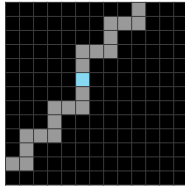

guess 2

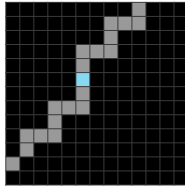

Supplement: supplementary_material [file d06dbe63_solutions.pdf › CompressARC/results_for_the_blog_post/plots_training/d06dbe63_solutions.pdf]

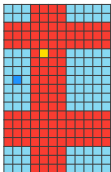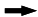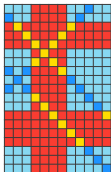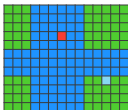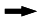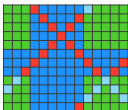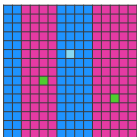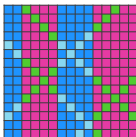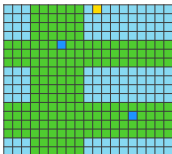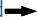

?

Supplement: supplementary_material [file d07ae81c_problem.pdf › CompressARC/results_for_the_blog_post/plots_training/d07ae81c_problem.pdf]

sample

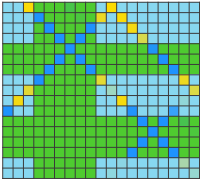

sample average

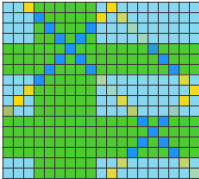

guess 1

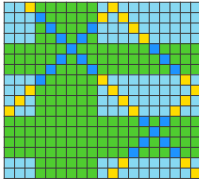

guess 2

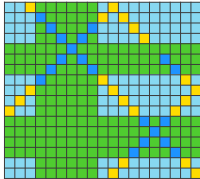

Supplement: supplementary_material [file d07ae81c_solutions.pdf › CompressARC/results_for_the_blog_post/plots_training/d07ae81c_solutions.pdf]

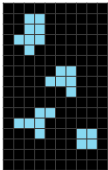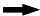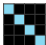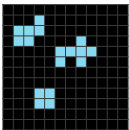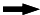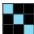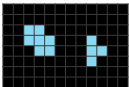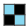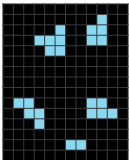

?

Supplement: supplementary_material [file d0f5fe59_problem.pdf › CompressARC/results_for_the_blog_post/plots_training/d0f5fe59_problem.pdf]

sample

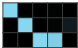

sample average

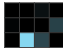

guess 1

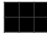

guess 2

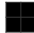

Supplement: supplementary_material [file d0f5fe59_solutions.pdf › CompressARC/results_for_the_blog_post/plots_training/d0f5fe59_solutions.pdf]

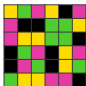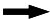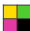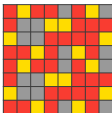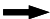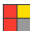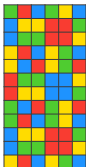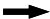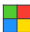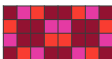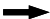

?

Supplement: supplementary_material [file d10ecb37_problem.pdf › CompressARC/results_for_the_blog_post/plots_training/d10ecb37_problem.pdf]

sample

sample average

guess 1

guess 2

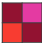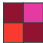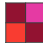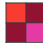

Supplement: supplementary_material [file d10ecb37_solutions.pdf › CompressARC/results_for_the_blog_post/plots_training/d10ecb37_solutions.pdf]

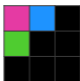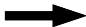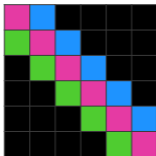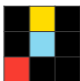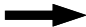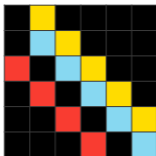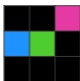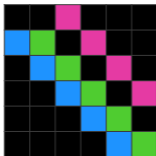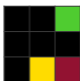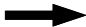

?

Supplement: supplementary_material [file d13f3404_problem.pdf › CompressARC/results_for_the_blog_post/plots_training/d13f3404_problem.pdf]

sample

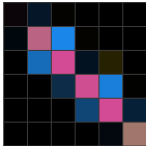

sample average

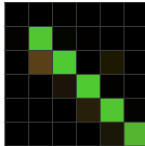

guess 1

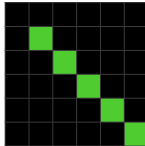

guess 2

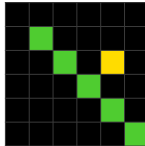

Supplement: supplementary_material [file d13f3404_solutions.pdf › CompressARC/results_for_the_blog_post/plots_training/d13f3404_solutions.pdf]

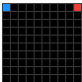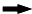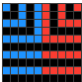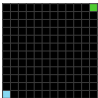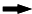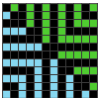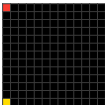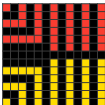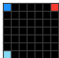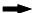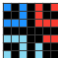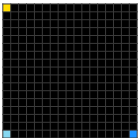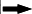

?

Supplement: supplementary_material [file d22278a0_problem.pdf › CompressARC/results_for_the_blog_post/plots_training/d22278a0_problem.pdf]

sample

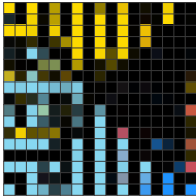

sample average

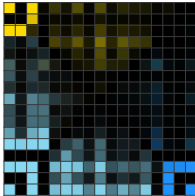

guess 1

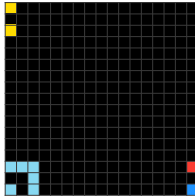

guess 2

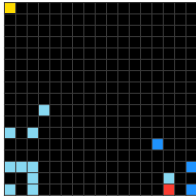

Supplement: supplementary_material [file d22278a0_solutions.pdf › CompressARC/results_for_the_blog_post/plots_training/d22278a0_solutions.pdf]

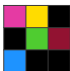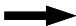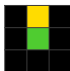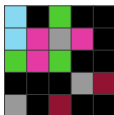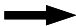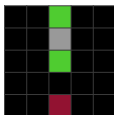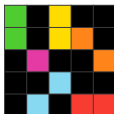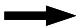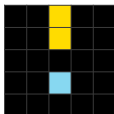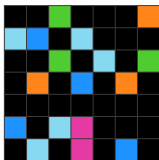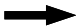

?

Supplement: supplementary_material [file d23f8c26_problem.pdf › CompressARC/results_for_the_blog_post/plots_training/d23f8c26_problem.pdf]

sample

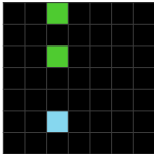

sample average

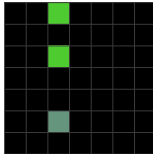

guess 1

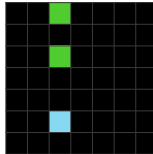

guess 2

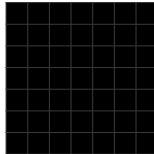

Supplement: supplementary_material [file d23f8c26_solutions.pdf › CompressARC/results_for_the_blog_post/plots_training/d23f8c26_solutions.pdf]

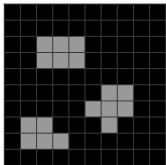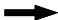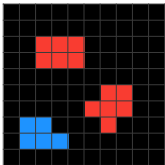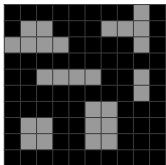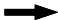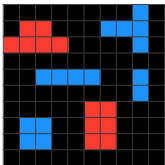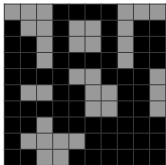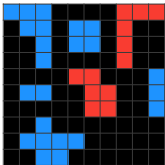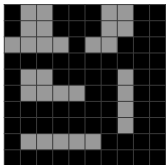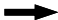

?

Supplement: supplementary_material [file d2abd087_problem.pdf › CompressARC/results_for_the_blog_post/plots_training/d2abd087_problem.pdf]

sample

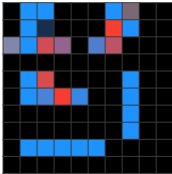

sample average

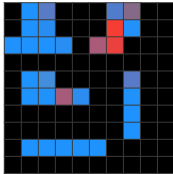

guess 1

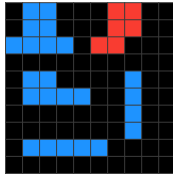

guess 2

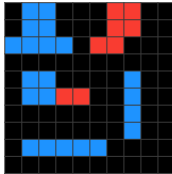

Supplement: supplementary_material [file d2abd087_solutions.pdf › CompressARC/results_for_the_blog_post/plots_training/d2abd087_solutions.pdf]

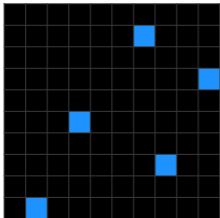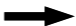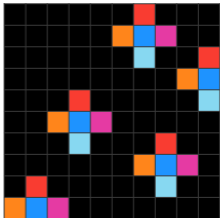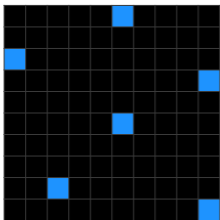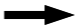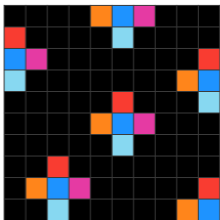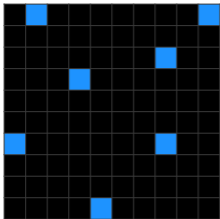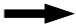

?

Supplement: supplementary_material [file d364b489_problem.pdf › CompressARC/results_for_the_blog_post/plots_training/d364b489_problem.pdf]

sample

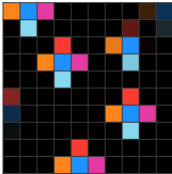

sample average

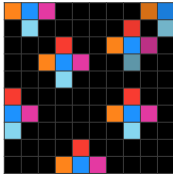

guess 1

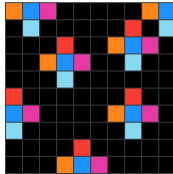

guess 2

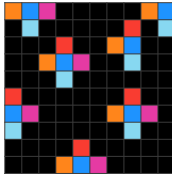

Supplement: supplementary_material [file d364b489_solutions.pdf › CompressARC/results_for_the_blog_post/plots_training/d364b489_solutions.pdf]

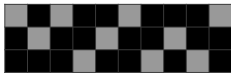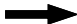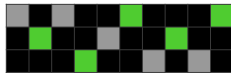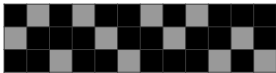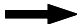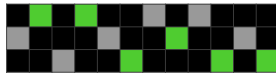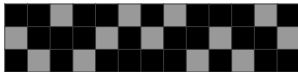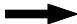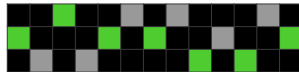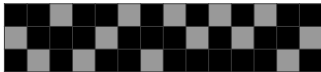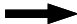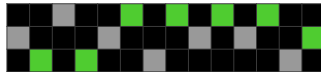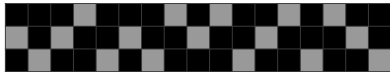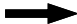

?

Supplement: supplementary_material [file d406998b_problem.pdf › CompressARC/results_for_the_blog_post/plots_training/d406998b_problem.pdf]

sample

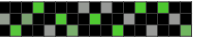

sample average

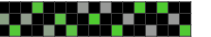

guess 1

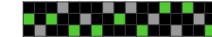

guess 2

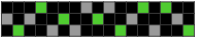

Supplement: supplementary_material [file d406998b_solutions.pdf › CompressARC/results_for_the_blog_post/plots_training/d406998b_solutions.pdf]

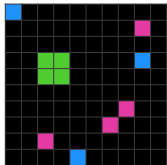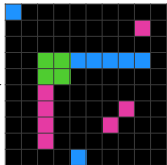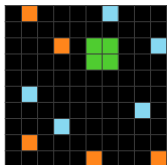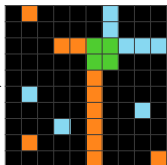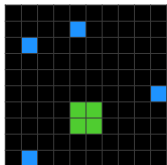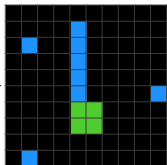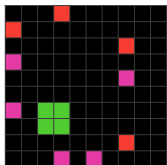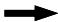

?

Supplement: supplementary_material [file d43fd935_problem.pdf › CompressARC/results_for_the_blog_post/plots_training/d43fd935_problem.pdf]

sample

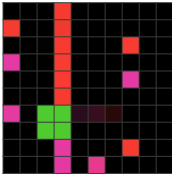

sample average

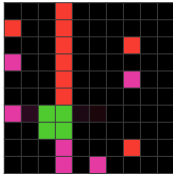

guess 1

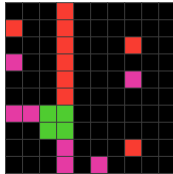

guess 2

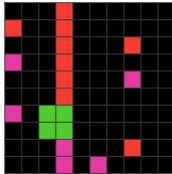

Supplement: supplementary_material [file d43fd935_solutions.pdf › CompressARC/results_for_the_blog_post/plots_training/d43fd935_solutions.pdf]

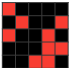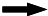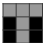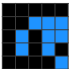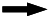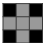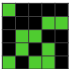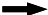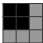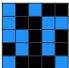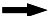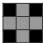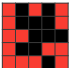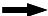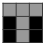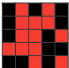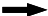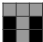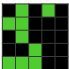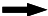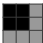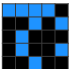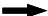

?

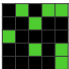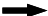

?

Supplement: supplementary_material [file d4469b4b_problem.pdf › CompressARC/results_for_the_blog_post/plots_training/d4469b4b_problem.pdf]

sample

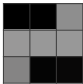

sample average

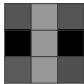

guess 1

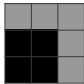

guess 2

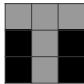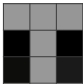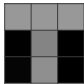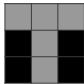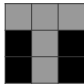

Supplement: supplementary_material [file d4469b4b_solutions.pdf › CompressARC/results_for_the_blog_post/plots_training/d4469b4b_solutions.pdf]

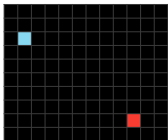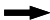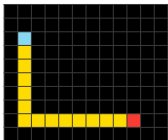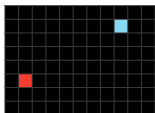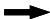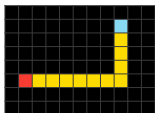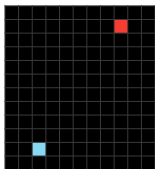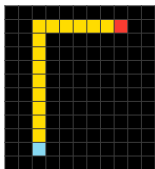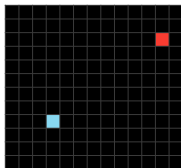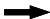

?

Supplement: supplementary_material [file d4a91cb9_problem.pdf › CompressARC/results_for_the_blog_post/plots_training/d4a91cb9_problem.pdf]

sample

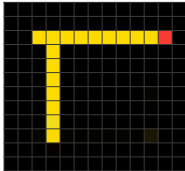

sample average

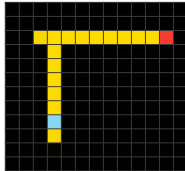

guess 1

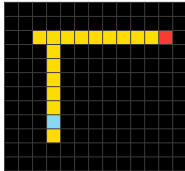

guess 2

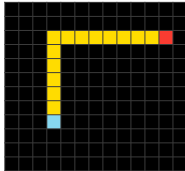

Supplement: supplementary_material [file d4a91cb9_solutions.pdf › CompressARC/results_for_the_blog_post/plots_training/d4a91cb9_solutions.pdf]

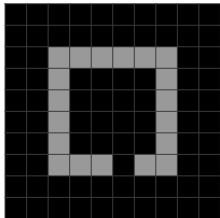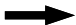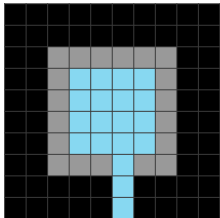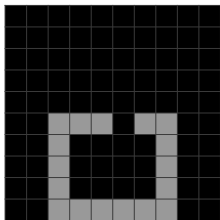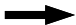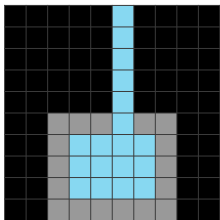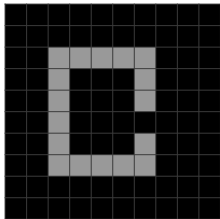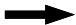

?

Supplement: supplementary_material [file d4f3cd78_problem.pdf › CompressARC/results_for_the_blog_post/plots_training/d4f3cd78_problem.pdf]

sample

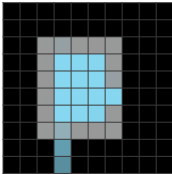

sample average

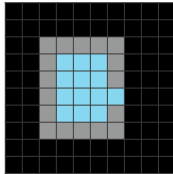

guess 1

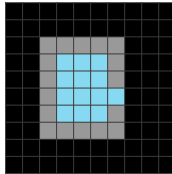

guess 2

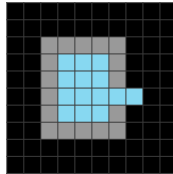

Supplement: supplementary_material [file d4f3cd78_solutions.pdf › CompressARC/results_for_the_blog_post/plots_training/d4f3cd78_solutions.pdf]

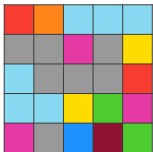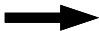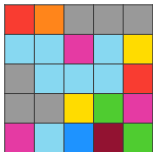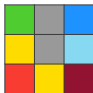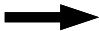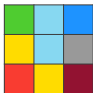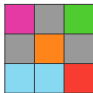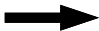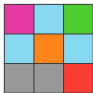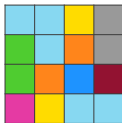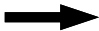

?

Supplement: supplementary_material [file d511f180_problem.pdf › CompressARC/results_for_the_blog_post/plots_training/d511f180_problem.pdf]

sample

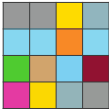

sample average

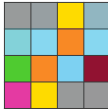

guess 1

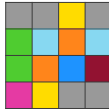

guess 2

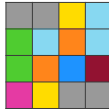

Supplement: supplementary_material [file d511f180_solutions.pdf › CompressARC/results_for_the_blog_post/plots_training/d511f180_solutions.pdf]

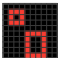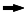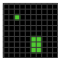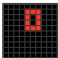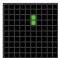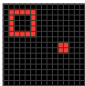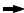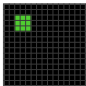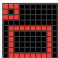

?

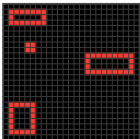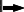

?

Supplement: supplementary_material [file d5d6de2d_problem.pdf › CompressARC/results_for_the_blog_post/plots_training/d5d6de2d_problem.pdf]

sample

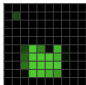

sample average

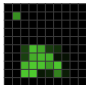

guess 1

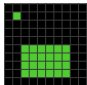

guess 2

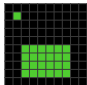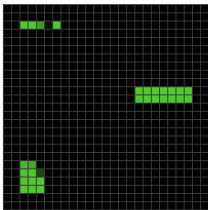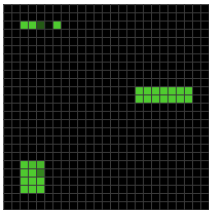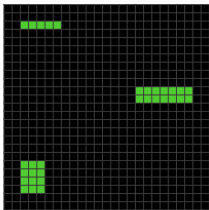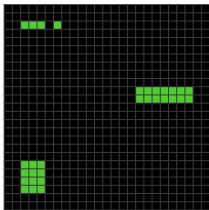

Supplement: supplementary_material [file d5d6de2d_solutions.pdf › CompressARC/results_for_the_blog_post/plots_training/d5d6de2d_solutions.pdf]

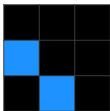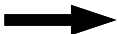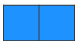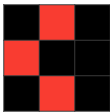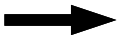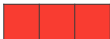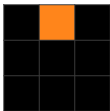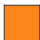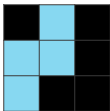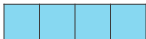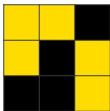

?

Supplement: supplementary_material [file d631b094_problem.pdf › CompressARC/results_for_the_blog_post/plots_training/d631b094_problem.pdf]

sample

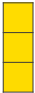

sample average

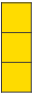

guess 1

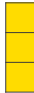

guess 2

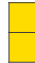

Supplement: supplementary_material [file d631b094_solutions.pdf › CompressARC/results_for_the_blog_post/plots_training/d631b094_solutions.pdf]

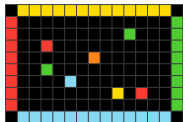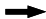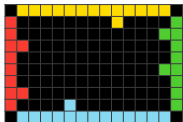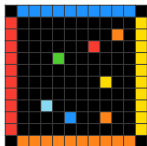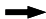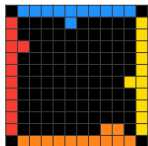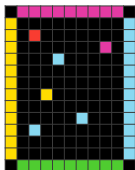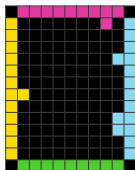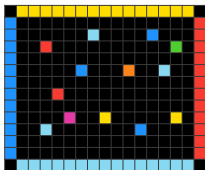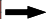

?

Supplement: supplementary_material [file d687bc17_problem.pdf › CompressARC/results_for_the_blog_post/plots_training/d687bc17_problem.pdf]

sample

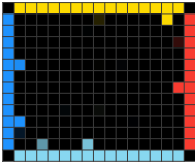

sample average

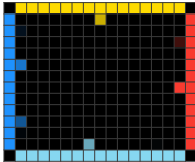

guess 1

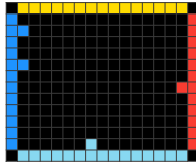

guess 2

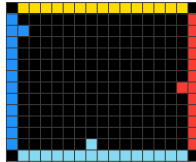

Supplement: supplementary_material [file d687bc17_solutions.pdf › CompressARC/results_for_the_blog_post/plots_training/d687bc17_solutions.pdf]

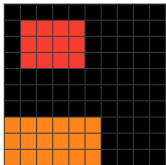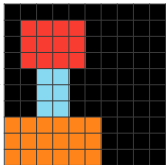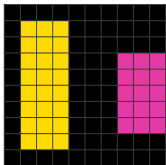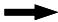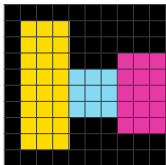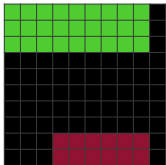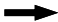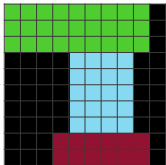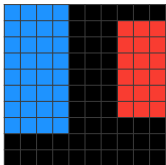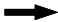

?

Supplement: supplementary_material [file d6ad076f_problem.pdf › CompressARC/results_for_the_blog_post/plots_training/d6ad076f_problem.pdf]

sample

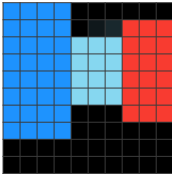

sample average

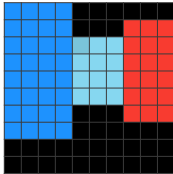

guess 1

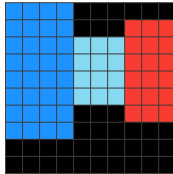

guess 2

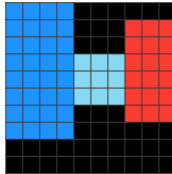

Supplement: supplementary_material [file d6ad076f_solutions.pdf › CompressARC/results_for_the_blog_post/plots_training/d6ad076f_solutions.pdf]

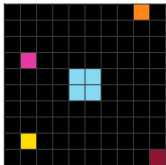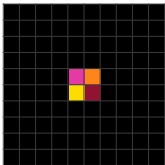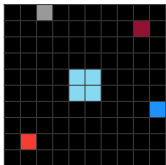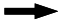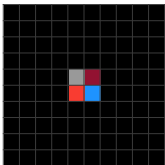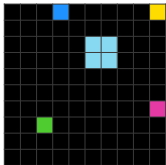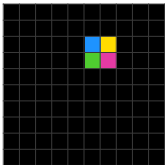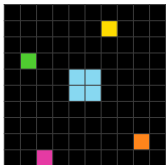

?

Supplement: supplementary_material [file d89b689b_problem.pdf › CompressARC/results_for_the_blog_post/plots_training/d89b689b_problem.pdf]

sample

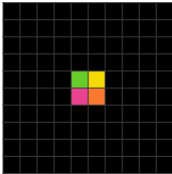

sample average

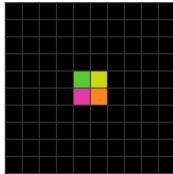

guess 1

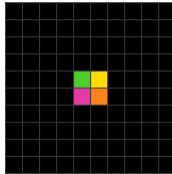

guess 2

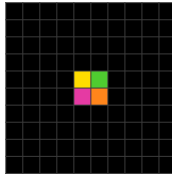

Supplement: supplementary_material [file d89b689b_solutions.pdf › CompressARC/results_for_the_blog_post/plots_training/d89b689b_solutions.pdf]

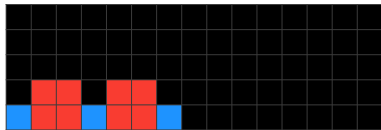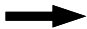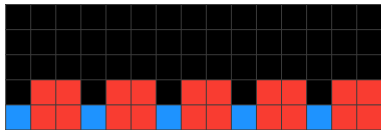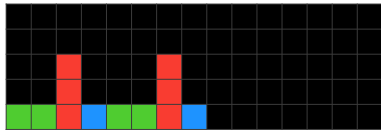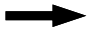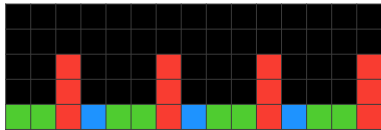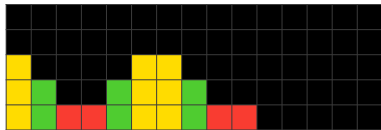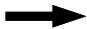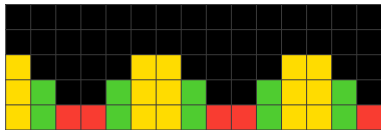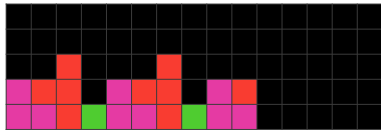

?

Supplement: supplementary_material [file d8c310e9_problem.pdf › CompressARC/results_for_the_blog_post/plots_training/d8c310e9_problem.pdf]

sample

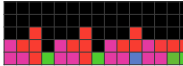

sample average

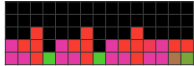

guess 1

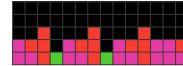

guess 2

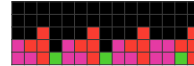

Supplement: supplementary_material [file d8c310e9_solutions.pdf › CompressARC/results_for_the_blog_post/plots_training/d8c310e9_solutions.pdf]

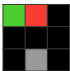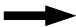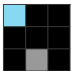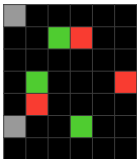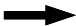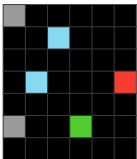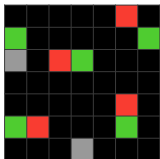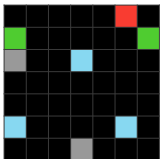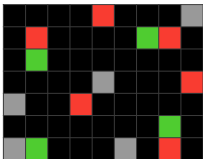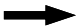

?

Supplement: supplementary_material [file d90796e8_problem.pdf › CompressARC/results_for_the_blog_post/plots_training/d90796e8_problem.pdf]

sample

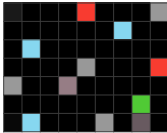

sample average

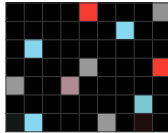

guess 1

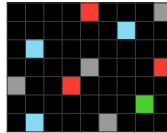

guess 2

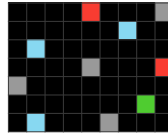

Supplement: supplementary_material [file d90796e8_solutions.pdf › CompressARC/results_for_the_blog_post/plots_training/d90796e8_solutions.pdf]

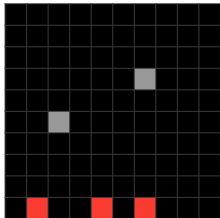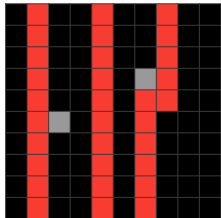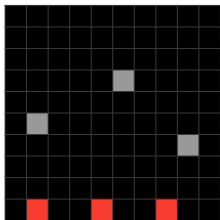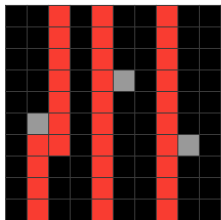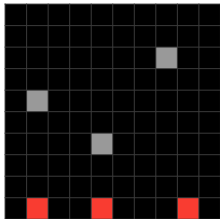

?

Supplement: supplementary_material [file d9f24cd1_problem.pdf › CompressARC/results_for_the_blog_post/plots_training/d9f24cd1_problem.pdf]

sample

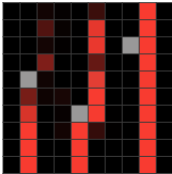

sample average

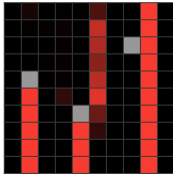

guess 1

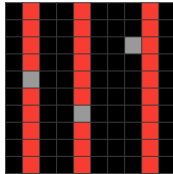

guess 2

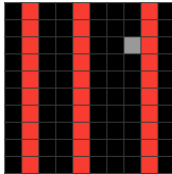

Supplement: supplementary_material [file d9f24cd1_solutions.pdf › CompressARC/results_for_the_blog_post/plots_training/d9f24cd1_solutions.pdf]

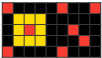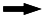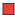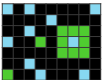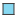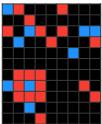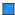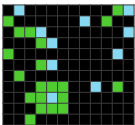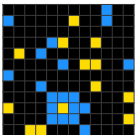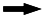

?

Supplement: supplementary_material [file d9fac9be_problem.pdf › CompressARC/results_for_the_blog_post/plots_training/d9fac9be_problem.pdf]

sample

sample average

guess 1

guess 2

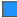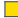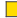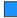

Supplement: supplementary_material [file d9fac9be_solutions.pdf › CompressARC/results_for_the_blog_post/plots_training/d9fac9be_solutions.pdf]

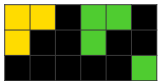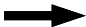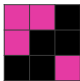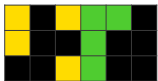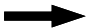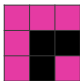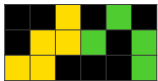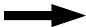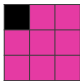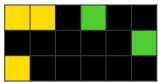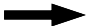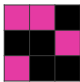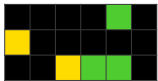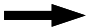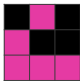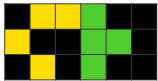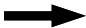

?

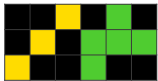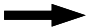

?

Supplement: supplementary_material [file dae9d2b5_problem.pdf › CompressARC/results_for_the_blog_post/plots_training/dae9d2b5_problem.pdf]

sample

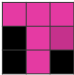

sample average

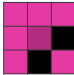

guess 1

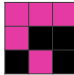

guess 2

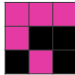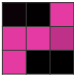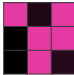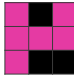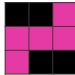

Supplement: supplementary_material [file dae9d2b5_solutions.pdf › CompressARC/results_for_the_blog_post/plots_training/dae9d2b5_solutions.pdf]

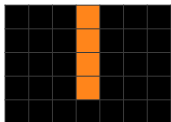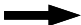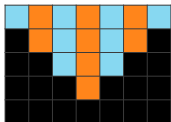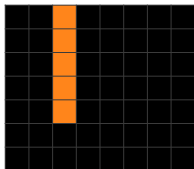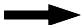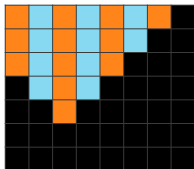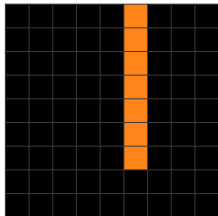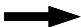

?

Supplement: supplementary_material [file db3e9e38_problem.pdf › CompressARC/results_for_the_blog_post/plots_training/db3e9e38_problem.pdf]

sample

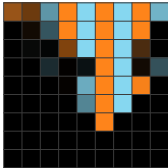

sample average

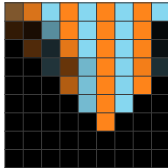

guess 1

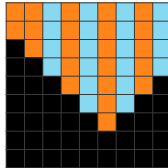

guess 2

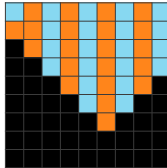

Supplement: supplementary_material [file db3e9e38_solutions.pdf › CompressARC/results_for_the_blog_post/plots_training/db3e9e38_solutions.pdf]

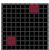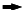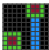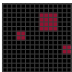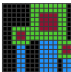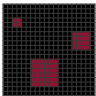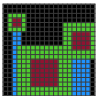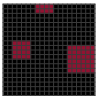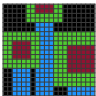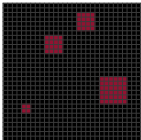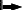

?

Supplement: supplementary_material [file db93a21d_problem.pdf › CompressARC/results_for_the_blog_post/plots_training/db93a21d_problem.pdf]

sample

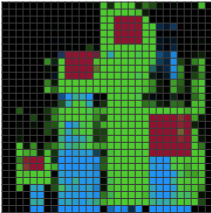

sample average

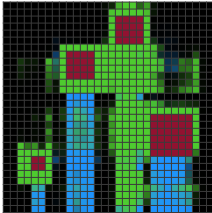

guess 1

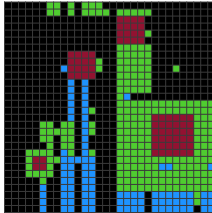

guess 2

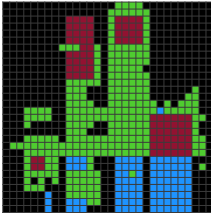

Supplement: supplementary_material [file db93a21d_solutions.pdf › CompressARC/results_for_the_blog_post/plots_training/db93a21d_solutions.pdf]

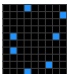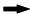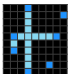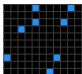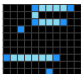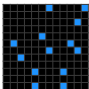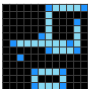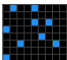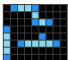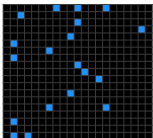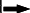

?

Supplement: supplementary_material [file dbc1a6ce_problem.pdf › CompressARC/results_for_the_blog_post/plots_training/dbc1a6ce_problem.pdf]

sample

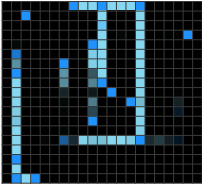

sample average

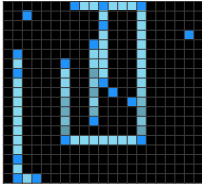

guess 1

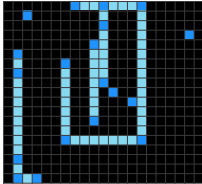

guess 2

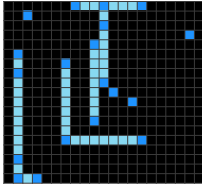

Supplement: supplementary_material [file dbc1a6ce_solutions.pdf › CompressARC/results_for_the_blog_post/plots_training/dbc1a6ce_solutions.pdf]

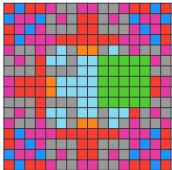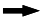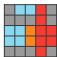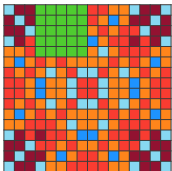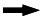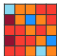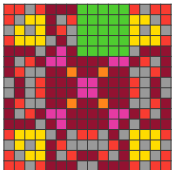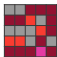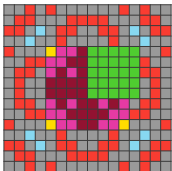

?

Supplement: supplementary_material [file dc0a314f_problem.pdf › CompressARC/results_for_the_blog_post/plots_training/dc0a314f_problem.pdf]

sample

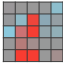

sample average

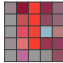

guess 1

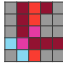

guess 2

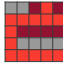

Supplement: supplementary_material [file dc0a314f_solutions.pdf › CompressARC/results_for_the_blog_post/plots_training/dc0a314f_solutions.pdf]

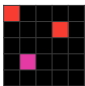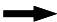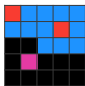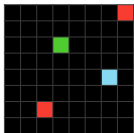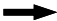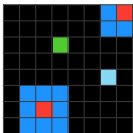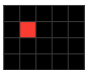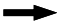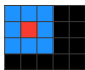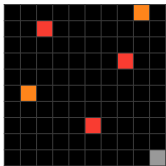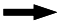

?

Supplement: supplementary_material [file dc1df850_problem.pdf › CompressARC/results_for_the_blog_post/plots_training/dc1df850_problem.pdf]

sample

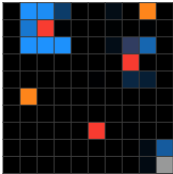

sample average

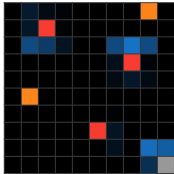

guess 1

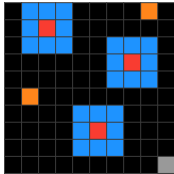

guess 2

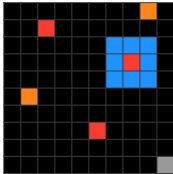

Supplement: supplementary_material [file dc1df850_solutions.pdf › CompressARC/results_for_the_blog_post/plots_training/dc1df850_solutions.pdf]

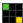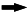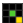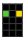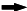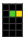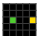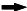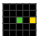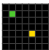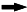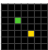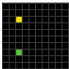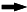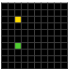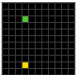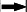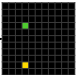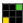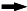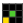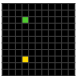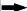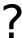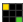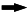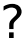

Supplement: supplementary_material [file dc433765_problem.pdf › CompressARC/results_for_the_blog_post/plots_training/dc433765_problem.pdf]

sample

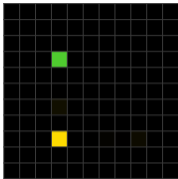

sample average

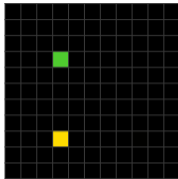

guess 1

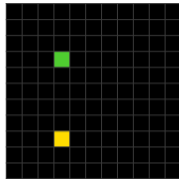

guess 2

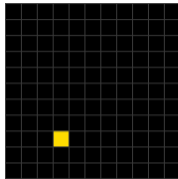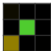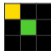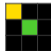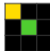

Supplement: supplementary_material [file dc433765_solutions.pdf › CompressARC/results_for_the_blog_post/plots_training/dc433765_solutions.pdf]

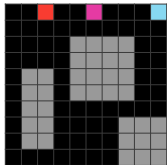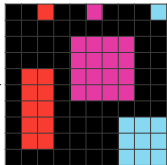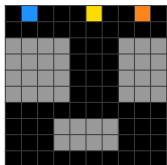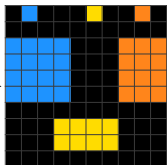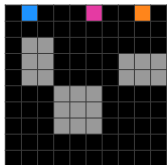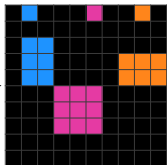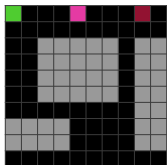

?

Supplement: supplementary_material [file ddf7fa4f_problem.pdf › CompressARC/results_for_the_blog_post/plots_training/ddf7fa4f_problem.pdf]

sample

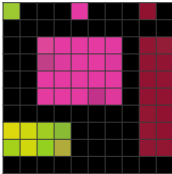

sample average

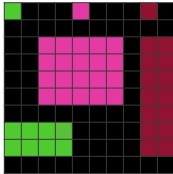

guess 1

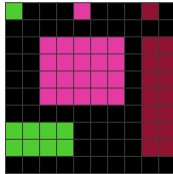

guess 2

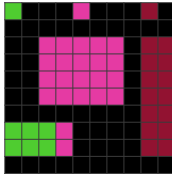

Supplement: supplementary_material [file ddf7fa4f_solutions.pdf › CompressARC/results_for_the_blog_post/plots_training/ddf7fa4f_solutions.pdf]
