# Supplementary material (part 8 of 17)
Source: ML conference proceedings conference paper supplement (https://openreview.net/forum?id=jLC662Yo5h)

sample

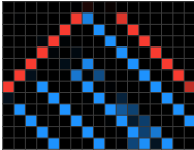

sample average

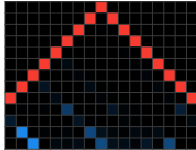

guess 1

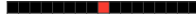

guess 2

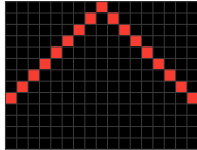

Supplement: supplementary_material [file c1990cce_solutions.pdf › CompressARC/results_for_the_blog_post/plots_evaluation/c1990cce_solutions.pdf]

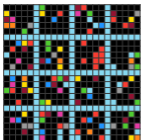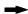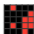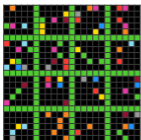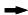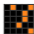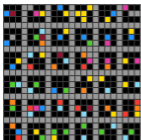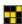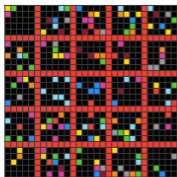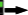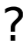

Supplement: supplementary_material [file c3202e5a_problem.pdf › CompressARC/results_for_the_blog_post/plots_evaluation/c3202e5a_problem.pdf]

sample

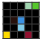

sample average

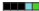

guess 1

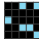

guess 2

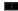

Supplement: supplementary_material [file c3202e5a_solutions.pdf › CompressARC/results_for_the_blog_post/plots_evaluation/c3202e5a_solutions.pdf]

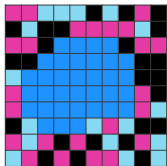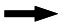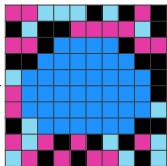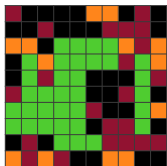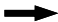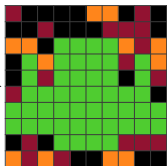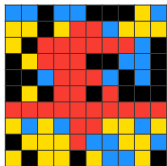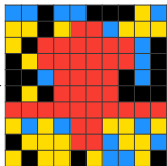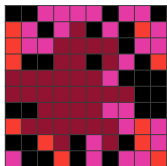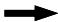

?

Supplement: supplementary_material [file c35c1b4c_problem.pdf › CompressARC/results_for_the_blog_post/plots_evaluation/c35c1b4c_problem.pdf]

sample

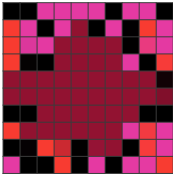

sample average

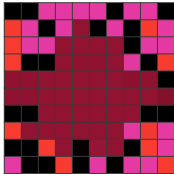

guess 1

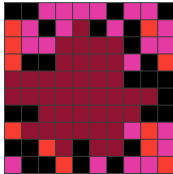

guess 2

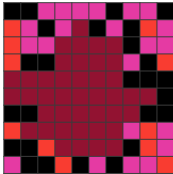

Supplement: supplementary_material [file c35c1b4c_solutions.pdf › CompressARC/results_for_the_blog_post/plots_evaluation/c35c1b4c_solutions.pdf]

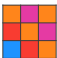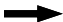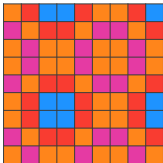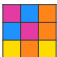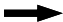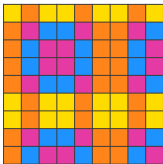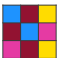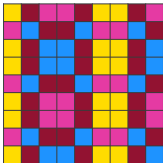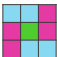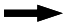

?

Supplement: supplementary_material [file c48954c1_problem.pdf › CompressARC/results_for_the_blog_post/plots_evaluation/c48954c1_problem.pdf]

sample

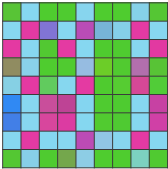

sample average

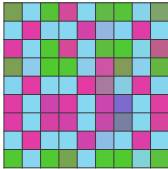

guess 1

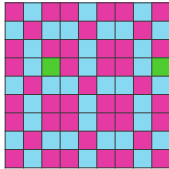

guess 2

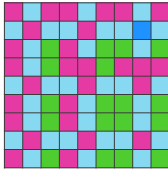

Supplement: supplementary_material [file c48954c1_solutions.pdf › CompressARC/results_for_the_blog_post/plots_evaluation/c48954c1_solutions.pdf]

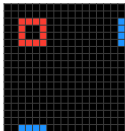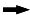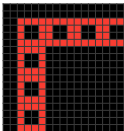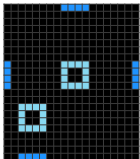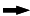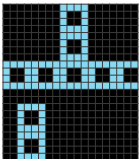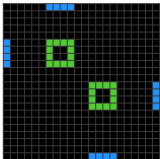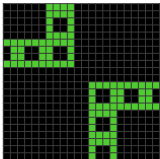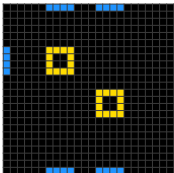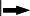

?

Supplement: supplementary_material [file c62e2108_problem.pdf › CompressARC/results_for_the_blog_post/plots_evaluation/c62e2108_problem.pdf]

sample

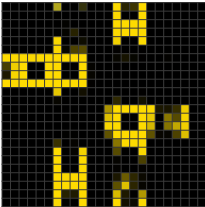

sample average

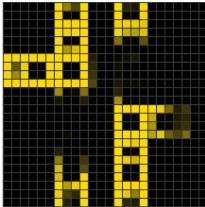

guess 1

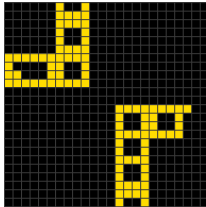

guess 2

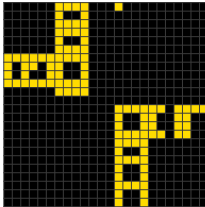

Supplement: supplementary_material [file c62e2108_solutions.pdf › CompressARC/results_for_the_blog_post/plots_evaluation/c62e2108_solutions.pdf]

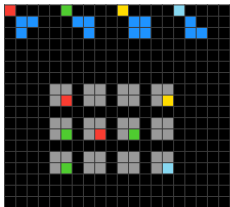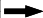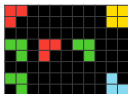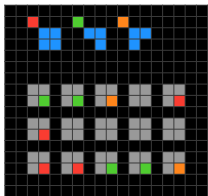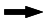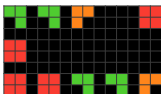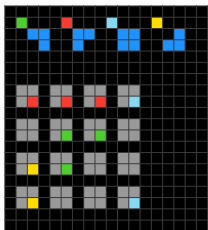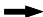

?

Supplement: supplementary_material [file c64f1187_problem.pdf › CompressARC/results_for_the_blog_post/plots_evaluation/c64f1187_problem.pdf]

sample

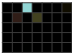

sample average

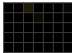

guess 1

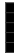

guess 2

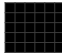

Supplement: supplementary_material [file c64f1187_solutions.pdf › CompressARC/results_for_the_blog_post/plots_evaluation/c64f1187_solutions.pdf]

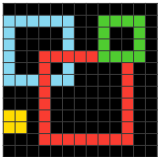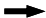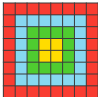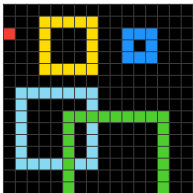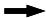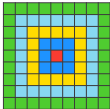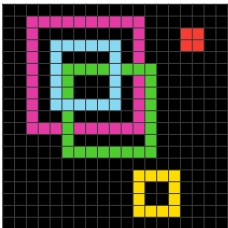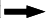

?

Supplement: supplementary_material [file c658a4bd_problem.pdf › CompressARC/results_for_the_blog_post/plots_evaluation/c658a4bd_problem.pdf]

sample

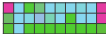

sample average

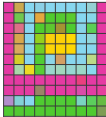

guess 1

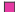

guess 2

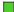

Supplement: supplementary_material [file c658a4bd_solutions.pdf › CompressARC/results_for_the_blog_post/plots_evaluation/c658a4bd_solutions.pdf]

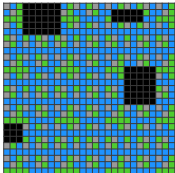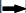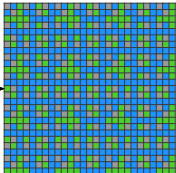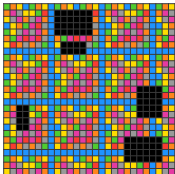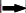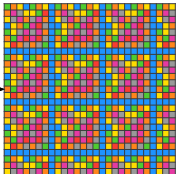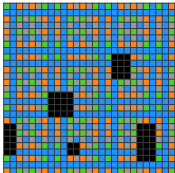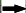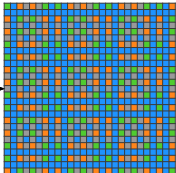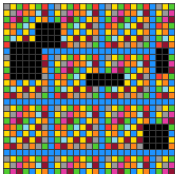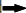

?

Supplement: supplementary_material [file c663677b_problem.pdf › CompressARC/results_for_the_blog_post/plots_evaluation/c663677b_problem.pdf]

sample

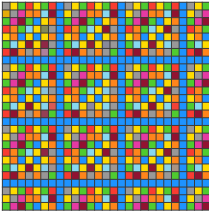

sample average

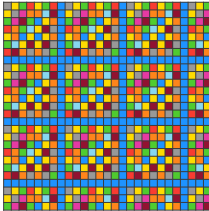

guess 1

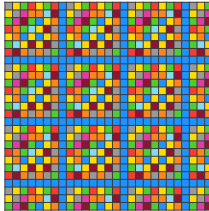

guess 2

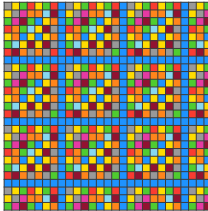

Supplement: supplementary_material [file c663677b_solutions.pdf › CompressARC/results_for_the_blog_post/plots_evaluation/c663677b_solutions.pdf]

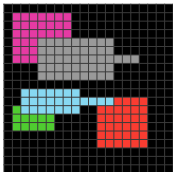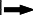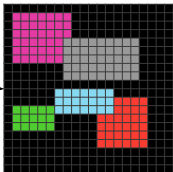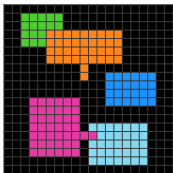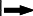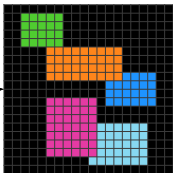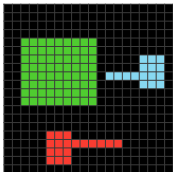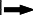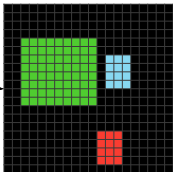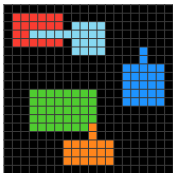

?

Supplement: supplementary_material [file c6e1b8da_problem.pdf › CompressARC/results_for_the_blog_post/plots_evaluation/c6e1b8da_problem.pdf]

sample

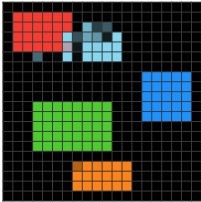

sample average

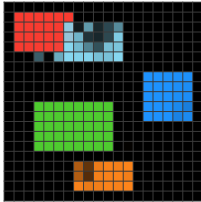

guess 1

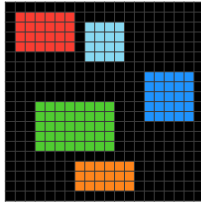

guess 2

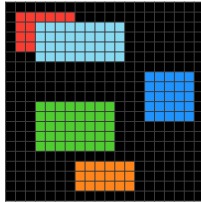

Supplement: supplementary_material [file c6e1b8da_solutions.pdf › CompressARC/results_for_the_blog_post/plots_evaluation/c6e1b8da_solutions.pdf]

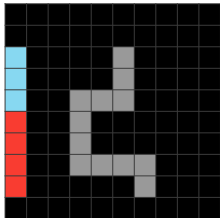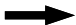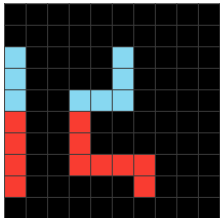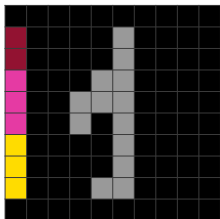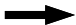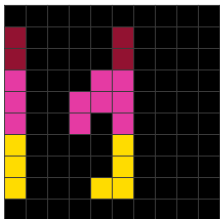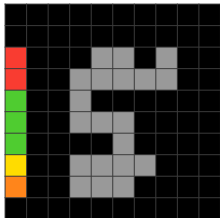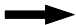

?

Supplement: supplementary_material [file c7d4e6ad_problem.pdf › CompressARC/results_for_the_blog_post/plots_evaluation/c7d4e6ad_problem.pdf]

sample

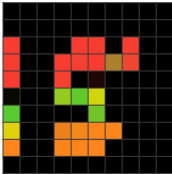

sample average

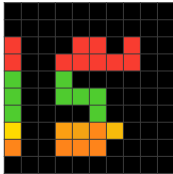

guess 1

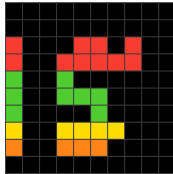

guess 2

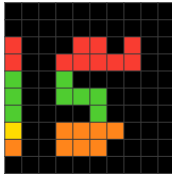

Supplement: supplementary_material [file c7d4e6ad_solutions.pdf › CompressARC/results_for_the_blog_post/plots_evaluation/c7d4e6ad_solutions.pdf]

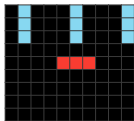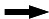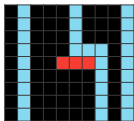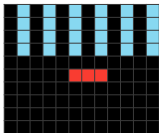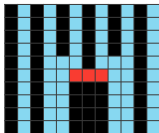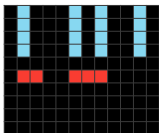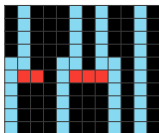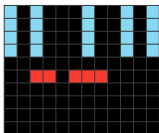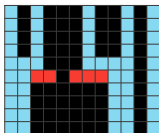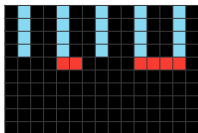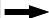

?

Supplement: supplementary_material [file c87289bb_problem.pdf › CompressARC/results_for_the_blog_post/plots_evaluation/c87289bb_problem.pdf]

sample

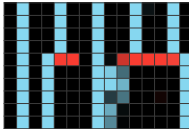

sample average

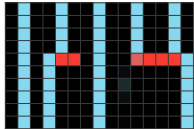

guess 1

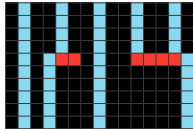

guess 2

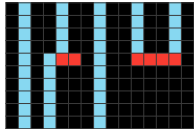

Supplement: supplementary_material [file c87289bb_solutions.pdf › CompressARC/results_for_the_blog_post/plots_evaluation/c87289bb_solutions.pdf]

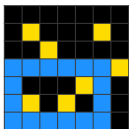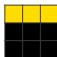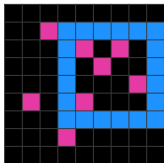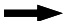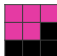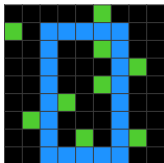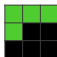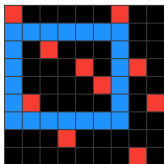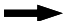

?

Supplement: supplementary_material [file c8b7cc0f_problem.pdf › CompressARC/results_for_the_blog_post/plots_evaluation/c8b7cc0f_problem.pdf]

sample

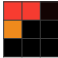

sample average

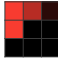

guess 1

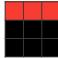

guess 2

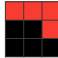

Supplement: supplementary_material [file c8b7cc0f_solutions.pdf › CompressARC/results_for_the_blog_post/plots_evaluation/c8b7cc0f_solutions.pdf]

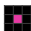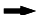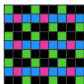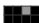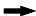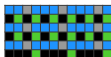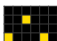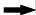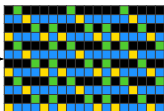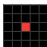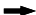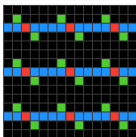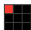

?

Supplement: supplementary_material [file c92b942c_problem.pdf › CompressARC/results_for_the_blog_post/plots_evaluation/c92b942c_problem.pdf]

sample

sample average

guess 1

guess 2

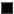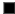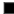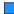

Supplement: supplementary_material [file c92b942c_solutions.pdf › CompressARC/results_for_the_blog_post/plots_evaluation/c92b942c_solutions.pdf]

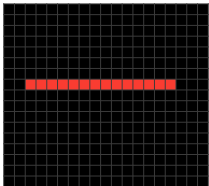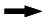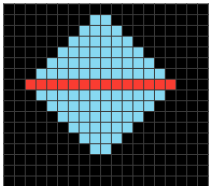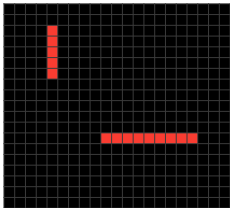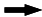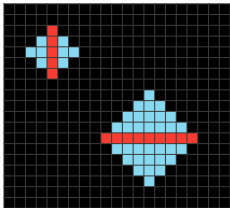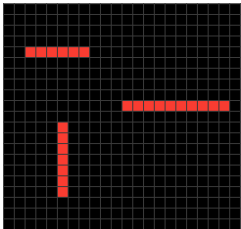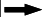

?

Supplement: supplementary_material [file c97c0139_problem.pdf › CompressARC/results_for_the_blog_post/plots_evaluation/c97c0139_problem.pdf]

sample

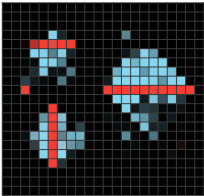

sample average

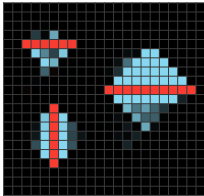

guess 1

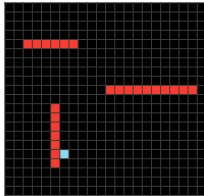

guess 2

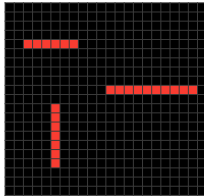

Supplement: supplementary_material [file c97c0139_solutions.pdf › CompressARC/results_for_the_blog_post/plots_evaluation/c97c0139_solutions.pdf]

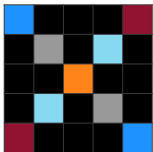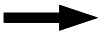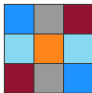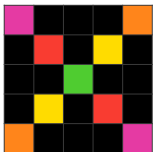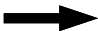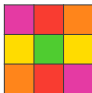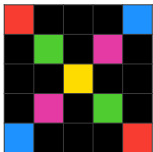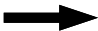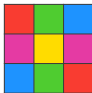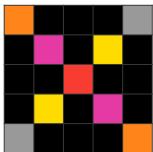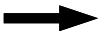

?

Supplement: supplementary_material [file ca8de6ea_problem.pdf › CompressARC/results_for_the_blog_post/plots_evaluation/ca8de6ea_problem.pdf]

sample

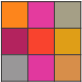

sample average

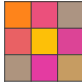

guess 1

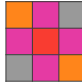

guess 2

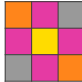

Supplement: supplementary_material [file ca8de6ea_solutions.pdf › CompressARC/results_for_the_blog_post/plots_evaluation/ca8de6ea_solutions.pdf]

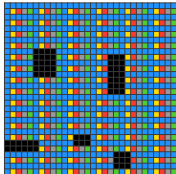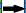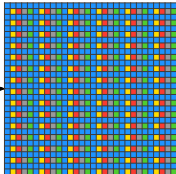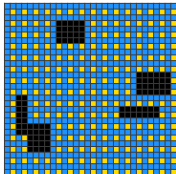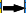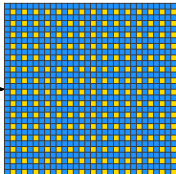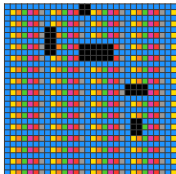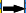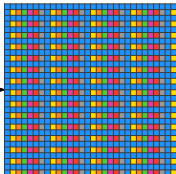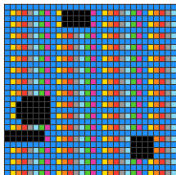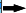

?

Supplement: supplementary_material [file ca8f78db_problem.pdf › CompressARC/results_for_the_blog_post/plots_evaluation/ca8f78db_problem.pdf]

sample

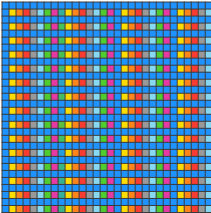

sample average

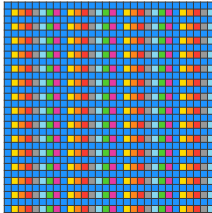

guess 1

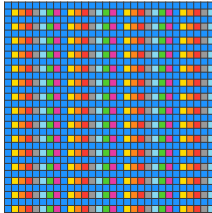

guess 2

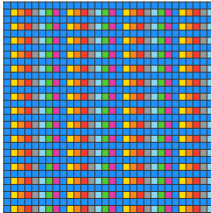

Supplement: supplementary_material [file ca8f78db_solutions.pdf › CompressARC/results_for_the_blog_post/plots_evaluation/ca8f78db_solutions.pdf]

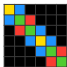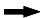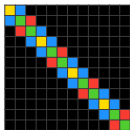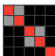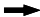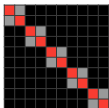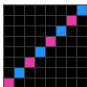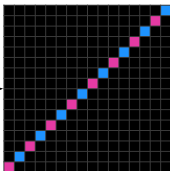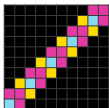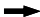

?

Supplement: supplementary_material [file cad67732_problem.pdf › CompressARC/results_for_the_blog_post/plots_evaluation/cad67732_problem.pdf]

sample

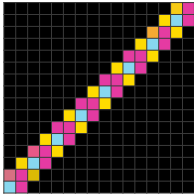

sample average

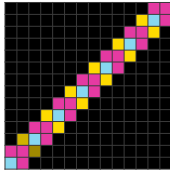

guess 1

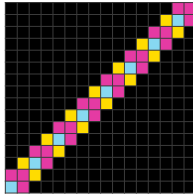

guess 2

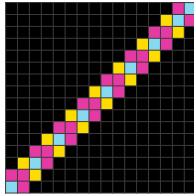

Supplement: supplementary_material [file cad67732_solutions.pdf › CompressARC/results_for_the_blog_post/plots_evaluation/cad67732_solutions.pdf]

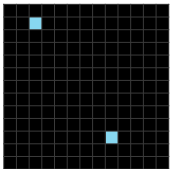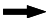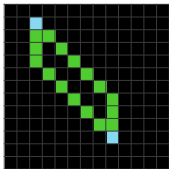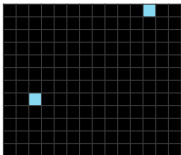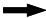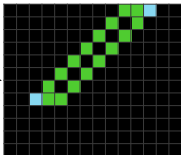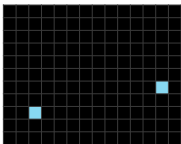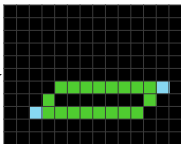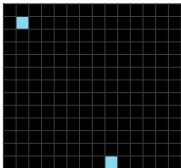

?

Supplement: supplementary_material [file cb227835_problem.pdf › CompressARC/results_for_the_blog_post/plots_evaluation/cb227835_problem.pdf]

sample

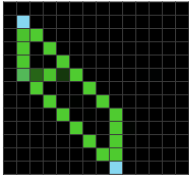

sample average

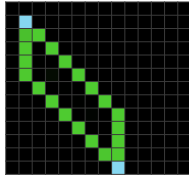

guess 1

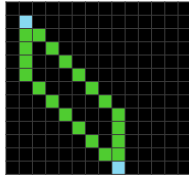

guess 2

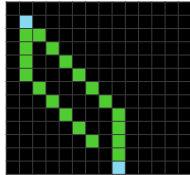

Supplement: supplementary_material [file cb227835_solutions.pdf › CompressARC/results_for_the_blog_post/plots_evaluation/cb227835_solutions.pdf]

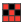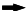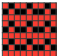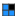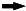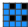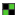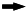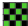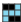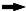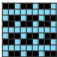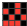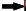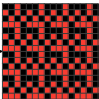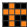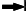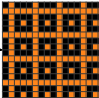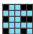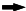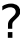

Supplement: supplementary_material [file ccd554ac_problem.pdf › CompressARC/results_for_the_blog_post/plots_evaluation/ccd554ac_problem.pdf]

sample

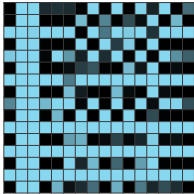

sample average

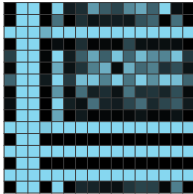

guess 1

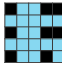

guess 2

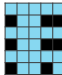

Supplement: supplementary_material [file ccd554ac_solutions.pdf › CompressARC/results_for_the_blog_post/plots_evaluation/ccd554ac_solutions.pdf]

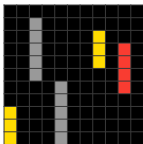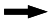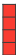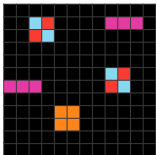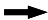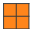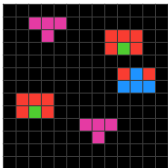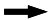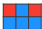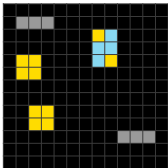

?

Supplement: supplementary_material [file cd3c21df_problem.pdf › CompressARC/results_for_the_blog_post/plots_evaluation/cd3c21df_problem.pdf]

sample

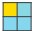

sample average

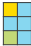

guess 1

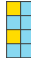

guess 2

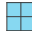

Supplement: supplementary_material [file cd3c21df_solutions.pdf › CompressARC/results_for_the_blog_post/plots_evaluation/cd3c21df_solutions.pdf]

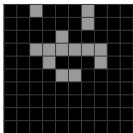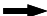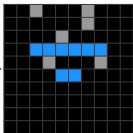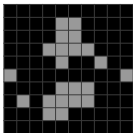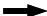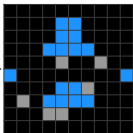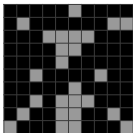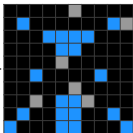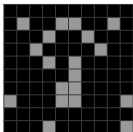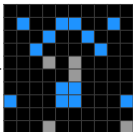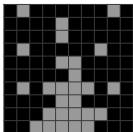

?

Supplement: supplementary_material [file ce039d91_problem.pdf › CompressARC/results_for_the_blog_post/plots_evaluation/ce039d91_problem.pdf]

sample

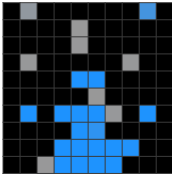

sample average

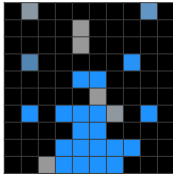

guess 1

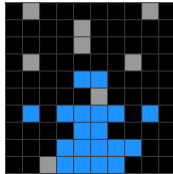

guess 2

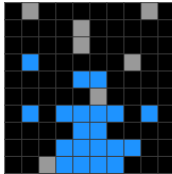

Supplement: supplementary_material [file ce039d91_solutions.pdf › CompressARC/results_for_the_blog_post/plots_evaluation/ce039d91_solutions.pdf]

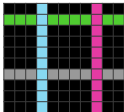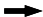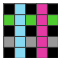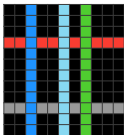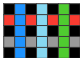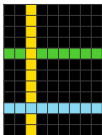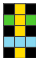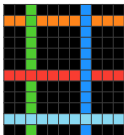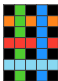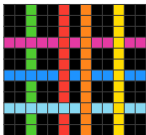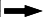

?

Supplement: supplementary_material [file ce8d95cc_problem.pdf › CompressARC/results_for_the_blog_post/plots_evaluation/ce8d95cc_problem.pdf]

sample

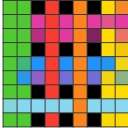

sample average

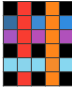

guess 1

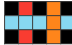

guess 2

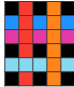

Supplement: supplementary_material [file ce8d95cc_solutions.pdf › CompressARC/results_for_the_blog_post/plots_evaluation/ce8d95cc_solutions.pdf]

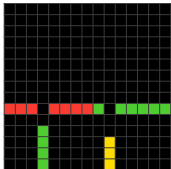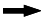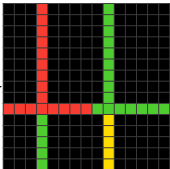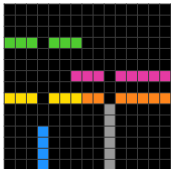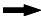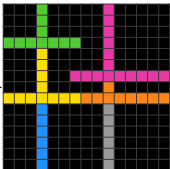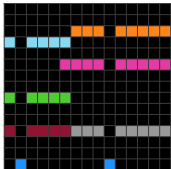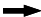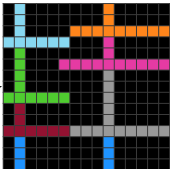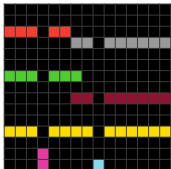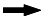

?

Supplement: supplementary_material [file cf133acc_problem.pdf › CompressARC/results_for_the_blog_post/plots_evaluation/cf133acc_problem.pdf]

sample

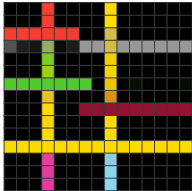

sample average

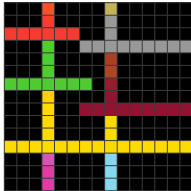

guess 1

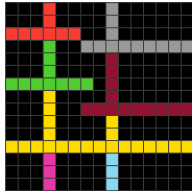

guess 2

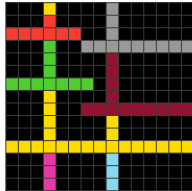

Supplement: supplementary_material [file cf133acc_solutions.pdf › CompressARC/results_for_the_blog_post/plots_evaluation/cf133acc_solutions.pdf]

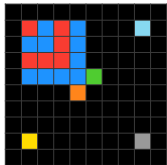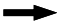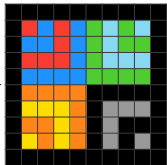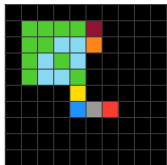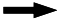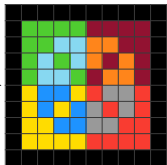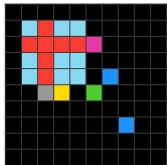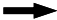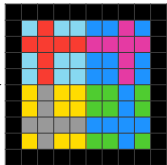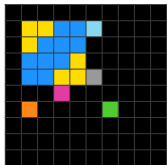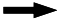

?

Supplement: supplementary_material [file cfb2ce5a_problem.pdf › CompressARC/results_for_the_blog_post/plots_evaluation/cfb2ce5a_problem.pdf]

sample

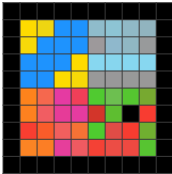

sample average

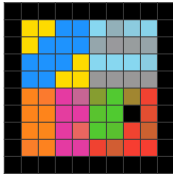

guess 1

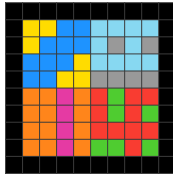

guess 2

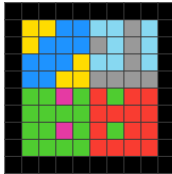

Supplement: supplementary_material [file cfb2ce5a_solutions.pdf › CompressARC/results_for_the_blog_post/plots_evaluation/cfb2ce5a_solutions.pdf]

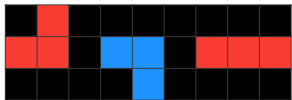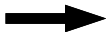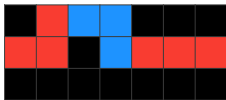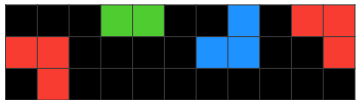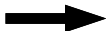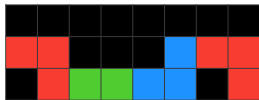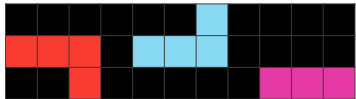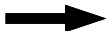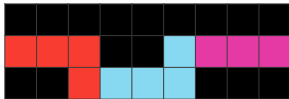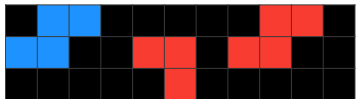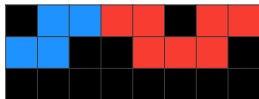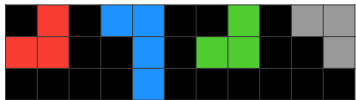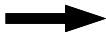

?

Supplement: supplementary_material [file d017b73f_problem.pdf › CompressARC/results_for_the_blog_post/plots_evaluation/d017b73f_problem.pdf]

sample

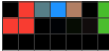

sample average

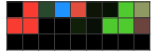

guess 1

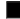

guess 2

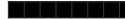

Supplement: supplementary_material [file d017b73f_solutions.pdf › CompressARC/results_for_the_blog_post/plots_evaluation/d017b73f_solutions.pdf]

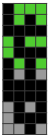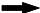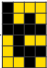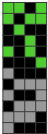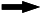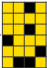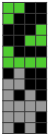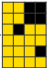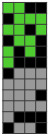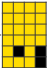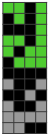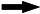

?

Supplement: supplementary_material [file d19f7514_problem.pdf › CompressARC/results_for_the_blog_post/plots_evaluation/d19f7514_problem.pdf]

sample

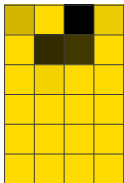

sample average

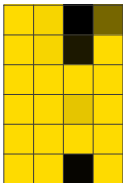

guess 1

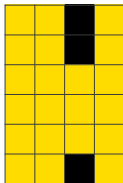

guess 2

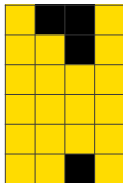

Supplement: supplementary_material [file d19f7514_solutions.pdf › CompressARC/results_for_the_blog_post/plots_evaluation/d19f7514_solutions.pdf]

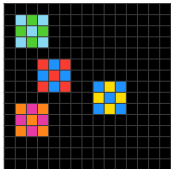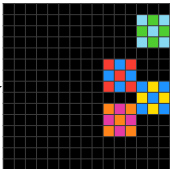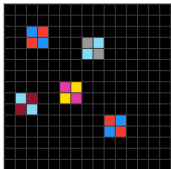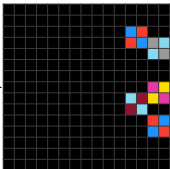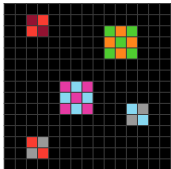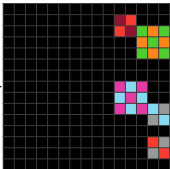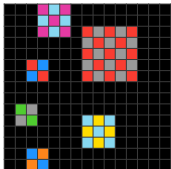

?

Supplement: supplementary_material [file d282b262_problem.pdf › CompressARC/results_for_the_blog_post/plots_evaluation/d282b262_problem.pdf]

sample

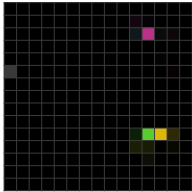

sample average

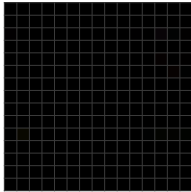

guess 1

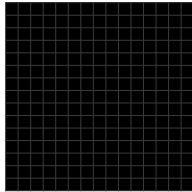

guess 2

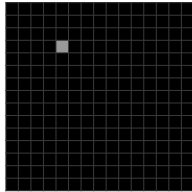

Supplement: supplementary_material [file d282b262_solutions.pdf › CompressARC/results_for_the_blog_post/plots_evaluation/d282b262_solutions.pdf]

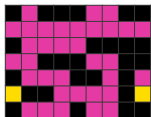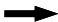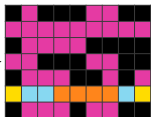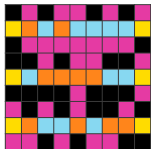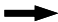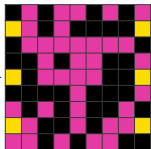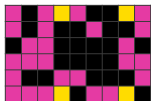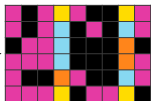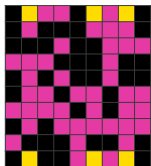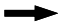

?

Supplement: supplementary_material [file d2acf2cb_problem.pdf › CompressARC/results_for_the_blog_post/plots_evaluation/d2acf2cb_problem.pdf]

sample

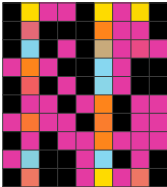

sample average

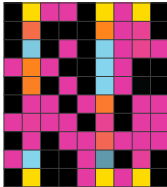

guess 1

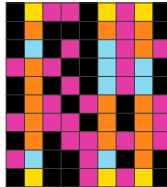

guess 2

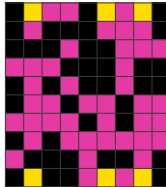

Supplement: supplementary_material [file d2acf2cb_solutions.pdf › CompressARC/results_for_the_blog_post/plots_evaluation/d2acf2cb_solutions.pdf]

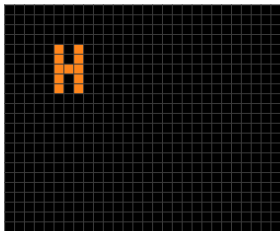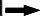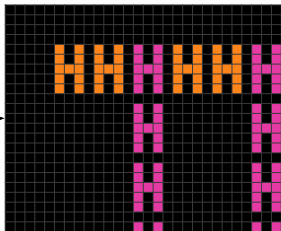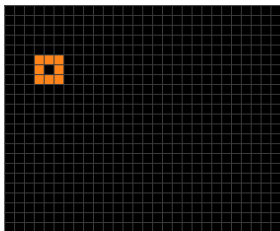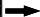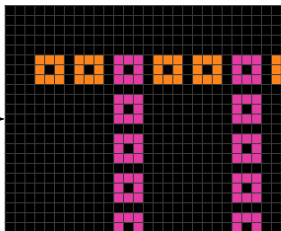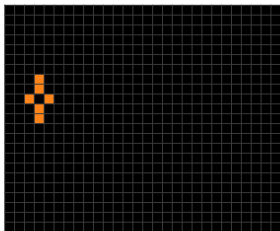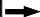

?

Supplement: supplementary_material [file d304284e_problem.pdf › CompressARC/results_for_the_blog_post/plots_evaluation/d304284e_problem.pdf]

sample

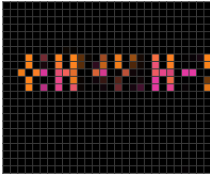

sample average

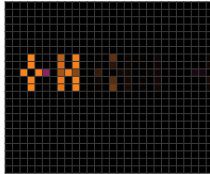

guess 1

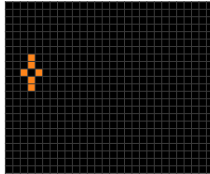

guess 2

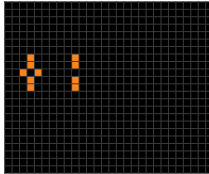

Supplement: supplementary_material [file d304284e_solutions.pdf › CompressARC/results_for_the_blog_post/plots_evaluation/d304284e_solutions.pdf]

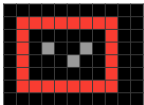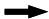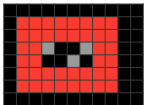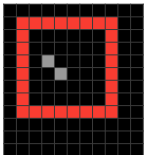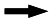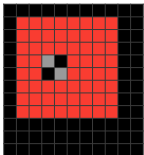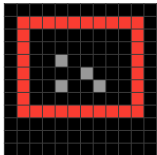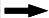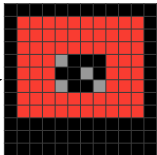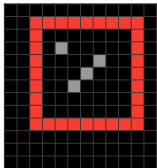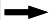

?

Supplement: supplementary_material [file d37a1ef5_problem.pdf › CompressARC/results_for_the_blog_post/plots_evaluation/d37a1ef5_problem.pdf]

sample

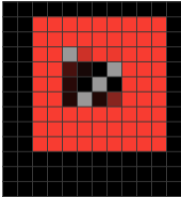

sample average

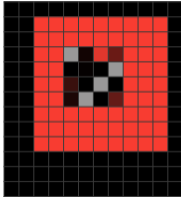

guess 1

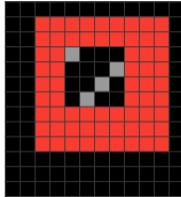

guess 2

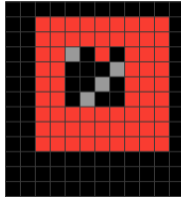

Supplement: supplementary_material [file d37a1ef5_solutions.pdf › CompressARC/results_for_the_blog_post/plots_evaluation/d37a1ef5_solutions.pdf]

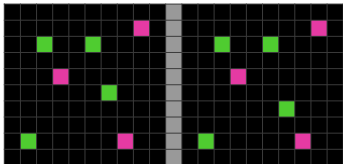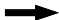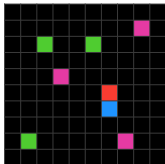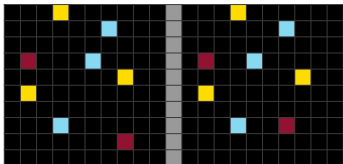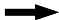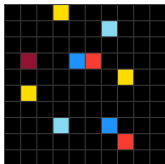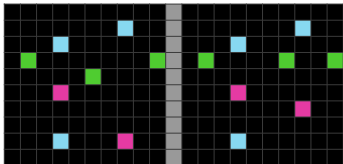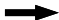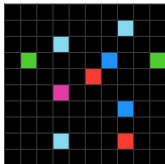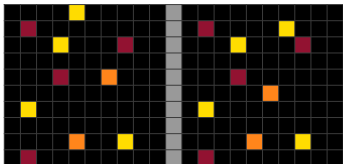

?

Supplement: supplementary_material [file d47aa2ff_problem.pdf › CompressARC/results_for_the_blog_post/plots_evaluation/d47aa2ff_problem.pdf]

sample

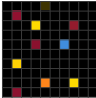

sample average

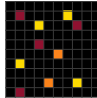

guess 1

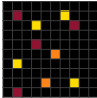

guess 2

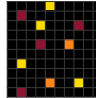

Supplement: supplementary_material [file d47aa2ff_solutions.pdf › CompressARC/results_for_the_blog_post/plots_evaluation/d47aa2ff_solutions.pdf]

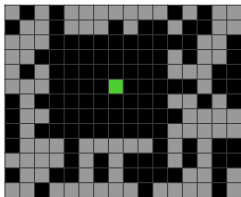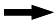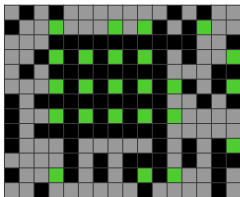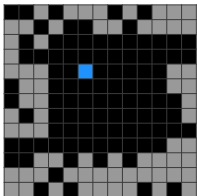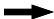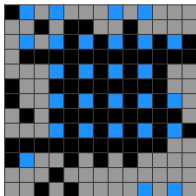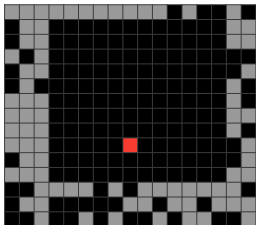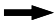

?

Supplement: supplementary_material [file d492a647_problem.pdf › CompressARC/results_for_the_blog_post/plots_evaluation/d492a647_problem.pdf]

sample

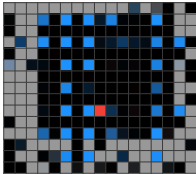

sample average

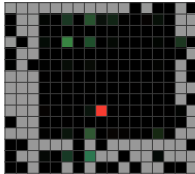

guess 1

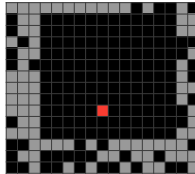

guess 2

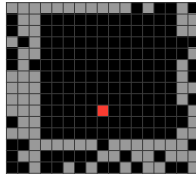

Supplement: supplementary_material [file d492a647_solutions.pdf › CompressARC/results_for_the_blog_post/plots_evaluation/d492a647_solutions.pdf]

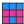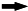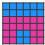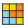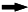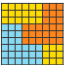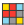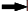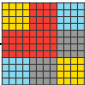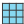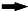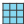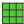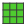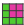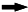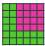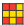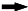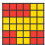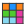

?

Supplement: supplementary_material [file d4b1c2b1_problem.pdf › CompressARC/results_for_the_blog_post/plots_evaluation/d4b1c2b1_problem.pdf]

sample

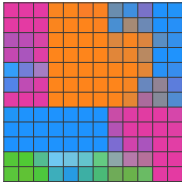

sample average

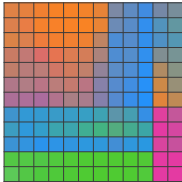

guess 1

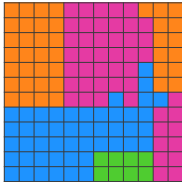

guess 2

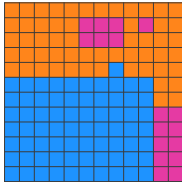

Supplement: supplementary_material [file d4b1c2b1_solutions.pdf › CompressARC/results_for_the_blog_post/plots_evaluation/d4b1c2b1_solutions.pdf]

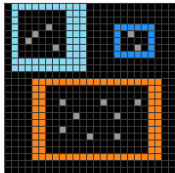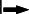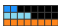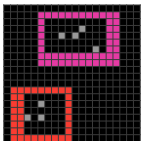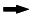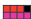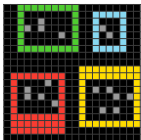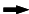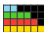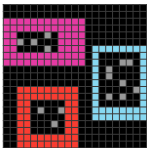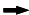

?

Supplement: supplementary_material [file d4c90558_problem.pdf › CompressARC/results_for_the_blog_post/plots_evaluation/d4c90558_problem.pdf]

sample

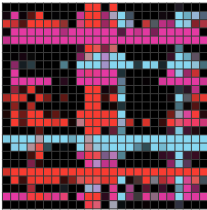

sample average

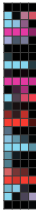

guess 1

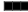

guess 2

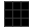

Supplement: supplementary_material [file d4c90558_solutions.pdf › CompressARC/results_for_the_blog_post/plots_evaluation/d4c90558_solutions.pdf]

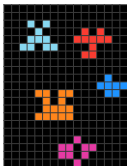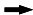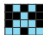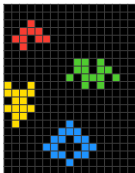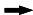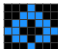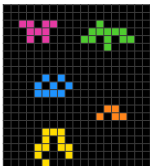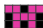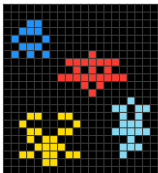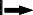

?

Supplement: supplementary_material [file d56f2372_problem.pdf › CompressARC/results_for_the_blog_post/plots_evaluation/d56f2372_problem.pdf]

sample

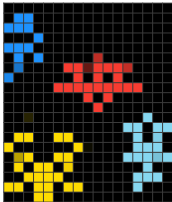

sample average

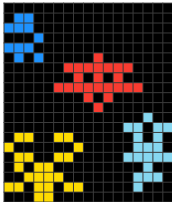

guess 1

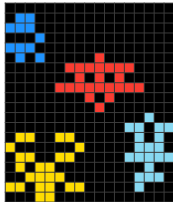

guess 2

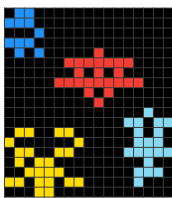

Supplement: supplementary_material [file d56f2372_solutions.pdf › CompressARC/results_for_the_blog_post/plots_evaluation/d56f2372_solutions.pdf]

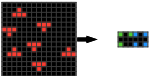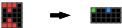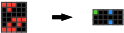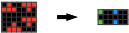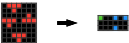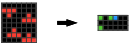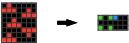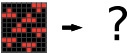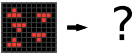

Supplement: supplementary_material [file d5c634a2_problem.pdf › CompressARC/results_for_the_blog_post/plots_evaluation/d5c634a2_problem.pdf]

sample

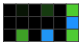

sample average

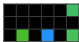

guess 1

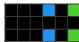

guess 2

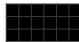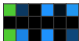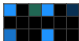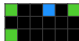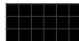

Supplement: supplementary_material [file d5c634a2_solutions.pdf › CompressARC/results_for_the_blog_post/plots_evaluation/d5c634a2_solutions.pdf]

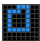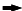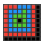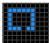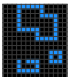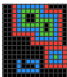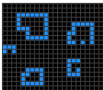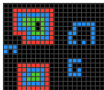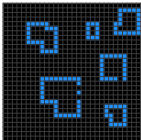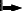

?

Supplement: supplementary_material [file d931c21c_problem.pdf › CompressARC/results_for_the_blog_post/plots_evaluation/d931c21c_problem.pdf]

sample

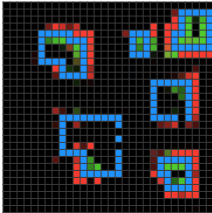

sample average

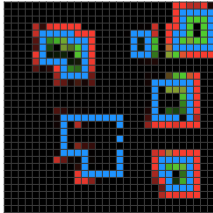

guess 1

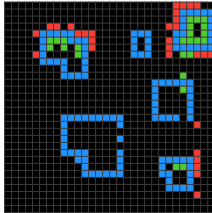

guess 2

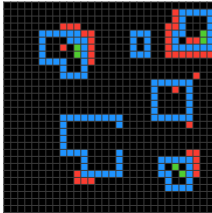

Supplement: supplementary_material [file d931c21c_solutions.pdf › CompressARC/results_for_the_blog_post/plots_evaluation/d931c21c_solutions.pdf]

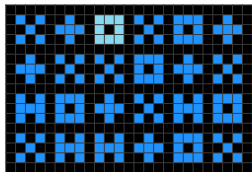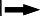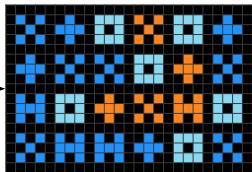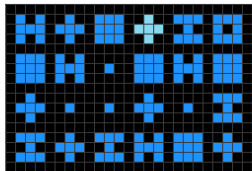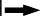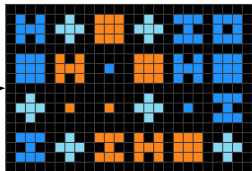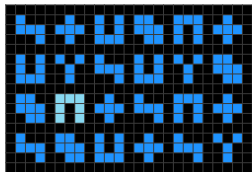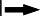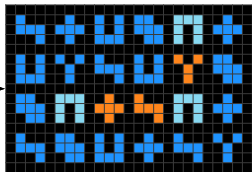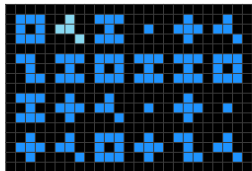

?

Supplement: supplementary_material [file d94c3b52_problem.pdf › CompressARC/results_for_the_blog_post/plots_evaluation/d94c3b52_problem.pdf]

sample

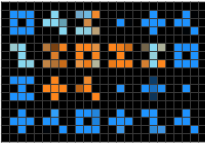

sample average

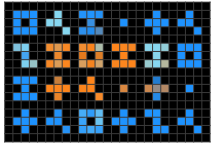

guess 1

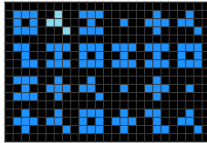

guess 2

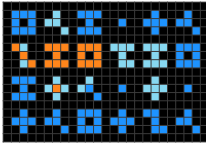

Supplement: supplementary_material [file d94c3b52_solutions.pdf › CompressARC/results_for_the_blog_post/plots_evaluation/d94c3b52_solutions.pdf]

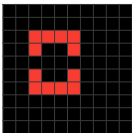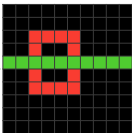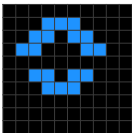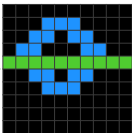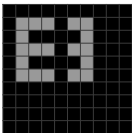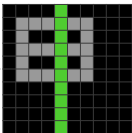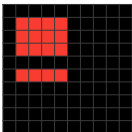

?

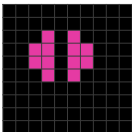

?

Supplement: supplementary_material [file da2b0fe3_problem.pdf › CompressARC/results_for_the_blog_post/plots_evaluation/da2b0fe3_problem.pdf]

sample

sample average

guess 1

guess 2

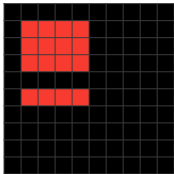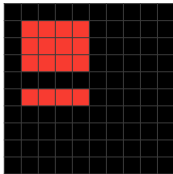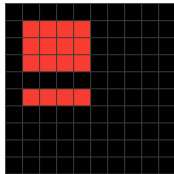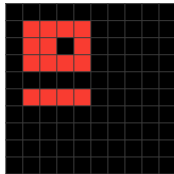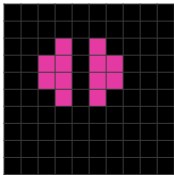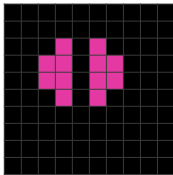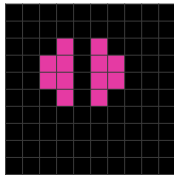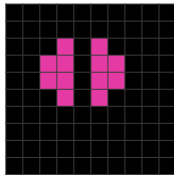

Supplement: supplementary_material [file da2b0fe3_solutions.pdf › CompressARC/results_for_the_blog_post/plots_evaluation/da2b0fe3_solutions.pdf]

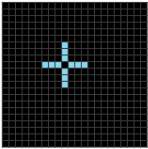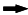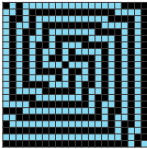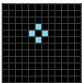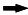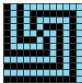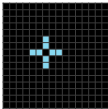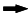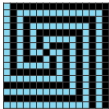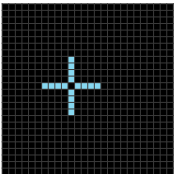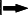

?

Supplement: supplementary_material [file da515329_problem.pdf › CompressARC/results_for_the_blog_post/plots_evaluation/da515329_problem.pdf]

sample

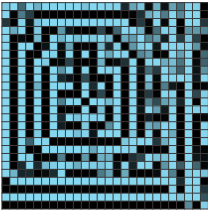

sample average

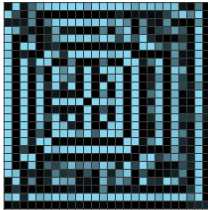

guess 1

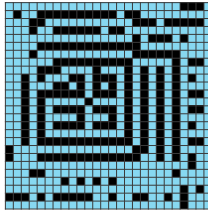

guess 2

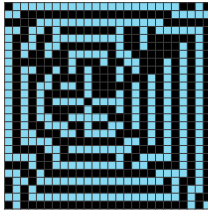

Supplement: supplementary_material [file da515329_solutions.pdf › CompressARC/results_for_the_blog_post/plots_evaluation/da515329_solutions.pdf]

sample

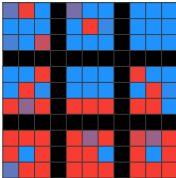

sample average

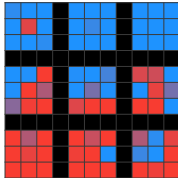

guess 1

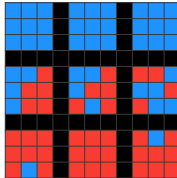

guess 2

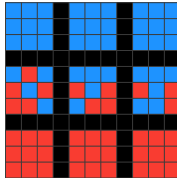

Supplement: supplementary_material [file dc2aa30b_solutions.pdf › CompressARC/results_for_the_blog_post/plots_evaluation/dc2aa30b_solutions.pdf]

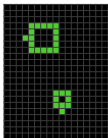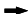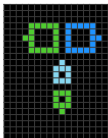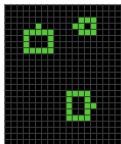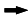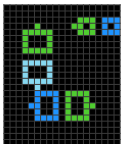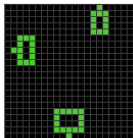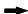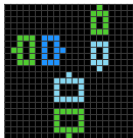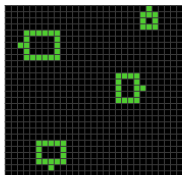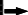

?

Supplement: supplementary_material [file dc2e9a9d_problem.pdf › CompressARC/results_for_the_blog_post/plots_evaluation/dc2e9a9d_problem.pdf]

sample

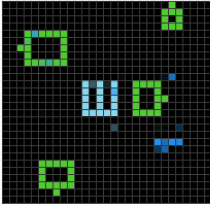

sample average

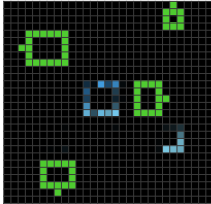

guess 1

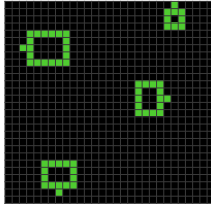

guess 2

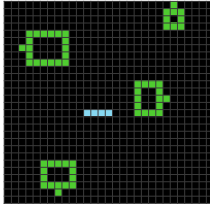

Supplement: supplementary_material [file dc2e9a9d_solutions.pdf › CompressARC/results_for_the_blog_post/plots_evaluation/dc2e9a9d_solutions.pdf]

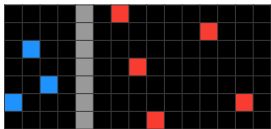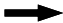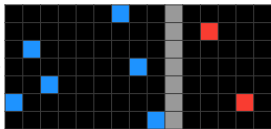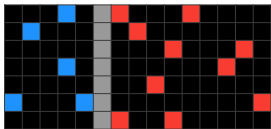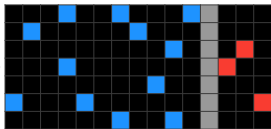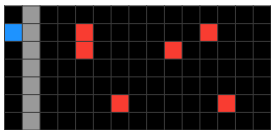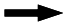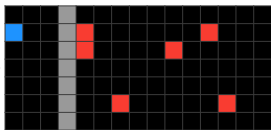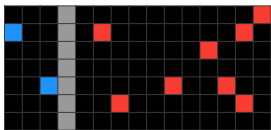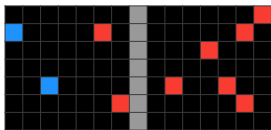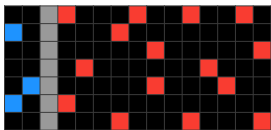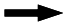

?

Supplement: supplementary_material [file dd2401ed_problem.pdf › CompressARC/results_for_the_blog_post/plots_evaluation/dd2401ed_problem.pdf]

sample

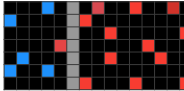

sample average

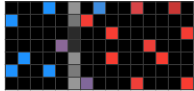

guess 1

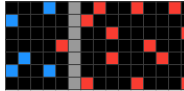

guess 2

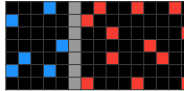

Supplement: supplementary_material [file dd2401ed_solutions.pdf › CompressARC/results_for_the_blog_post/plots_evaluation/dd2401ed_solutions.pdf]

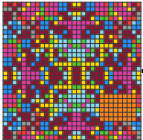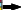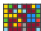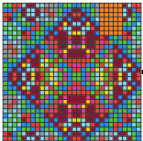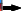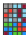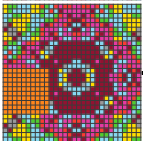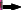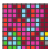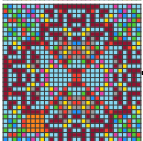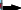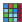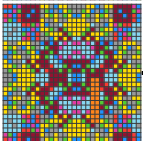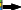

?

Supplement: supplementary_material [file de493100_problem.pdf › CompressARC/results_for_the_blog_post/plots_evaluation/de493100_problem.pdf]

sample

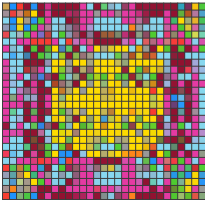

sample average

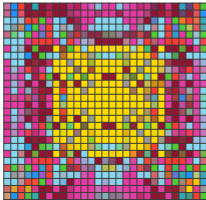

guess 1

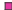

guess 2

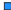

Supplement: supplementary_material [file de493100_solutions.pdf › CompressARC/results_for_the_blog_post/plots_evaluation/de493100_solutions.pdf]

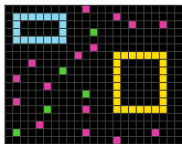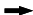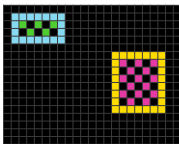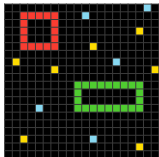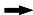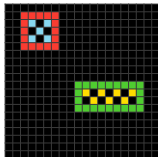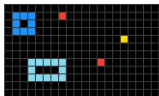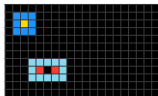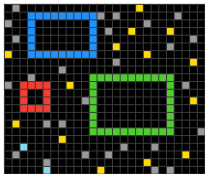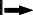

?

Supplement: supplementary_material [file df8cc377_problem.pdf › CompressARC/results_for_the_blog_post/plots_evaluation/df8cc377_problem.pdf]

sample

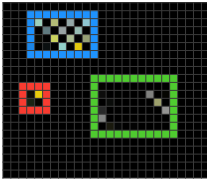

sample average

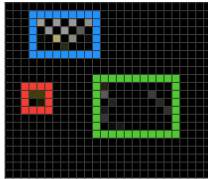

guess 1

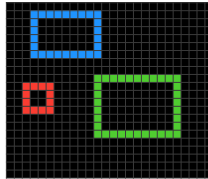

guess 2

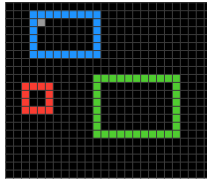

Supplement: supplementary_material [file df8cc377_solutions.pdf › CompressARC/results_for_the_blog_post/plots_evaluation/df8cc377_solutions.pdf]

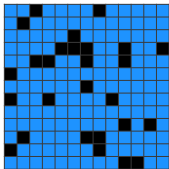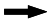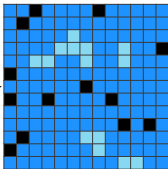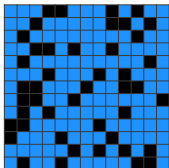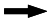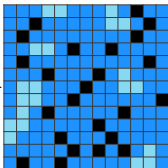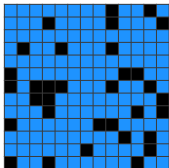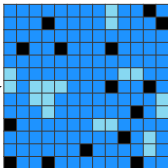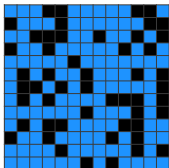

?

Supplement: supplementary_material [file e0fb7511_problem.pdf › CompressARC/results_for_the_blog_post/plots_evaluation/e0fb7511_problem.pdf]

sample

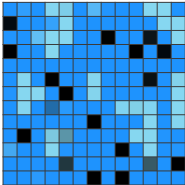

sample average

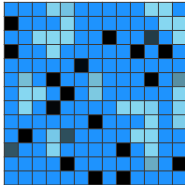

guess 1

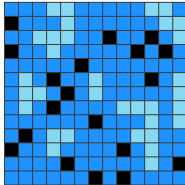

guess 2

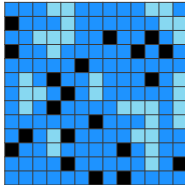

Supplement: supplementary_material [file e0fb7511_solutions.pdf › CompressARC/results_for_the_blog_post/plots_evaluation/e0fb7511_solutions.pdf]

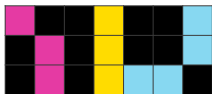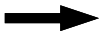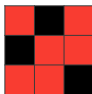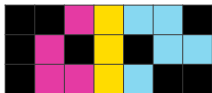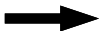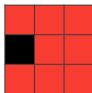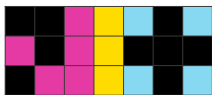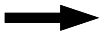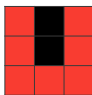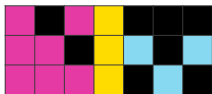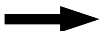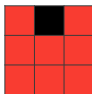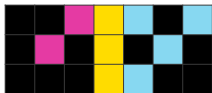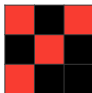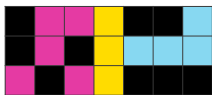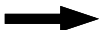

?

Supplement: supplementary_material [file e133d23d_problem.pdf › CompressARC/results_for_the_blog_post/plots_evaluation/e133d23d_problem.pdf]

sample

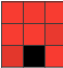

sample average

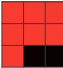

guess 1

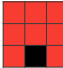

guess 2

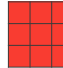

Supplement: supplementary_material [file e133d23d_solutions.pdf › CompressARC/results_for_the_blog_post/plots_evaluation/e133d23d_solutions.pdf]

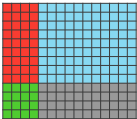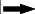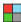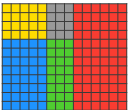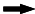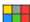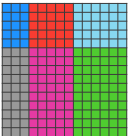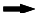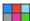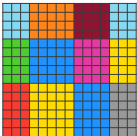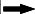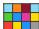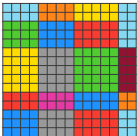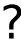

Supplement: supplementary_material [file e1baa8a4_problem.pdf › CompressARC/results_for_the_blog_post/plots_evaluation/e1baa8a4_problem.pdf]

sample

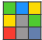

sample average

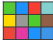

guess 1

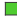

guess 2

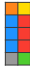

Supplement: supplementary_material [file e1baa8a4_solutions.pdf › CompressARC/results_for_the_blog_post/plots_evaluation/e1baa8a4_solutions.pdf]

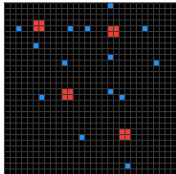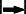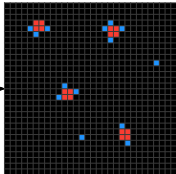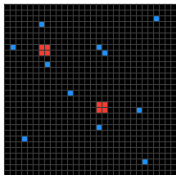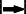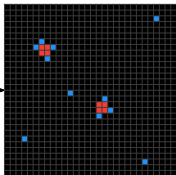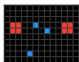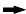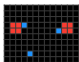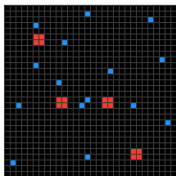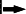

?

Supplement: supplementary_material [file e1d2900e_problem.pdf › CompressARC/results_for_the_blog_post/plots_evaluation/e1d2900e_problem.pdf]

sample

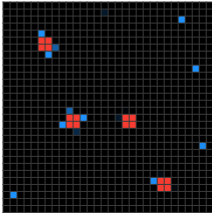

sample average

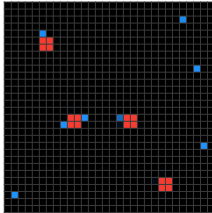

guess 1

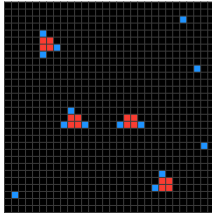

guess 2

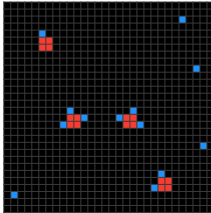

Supplement: supplementary_material [file e1d2900e_solutions.pdf › CompressARC/results_for_the_blog_post/plots_evaluation/e1d2900e_solutions.pdf]

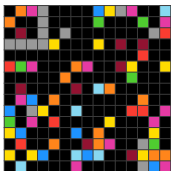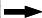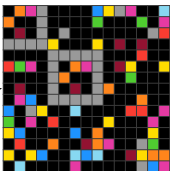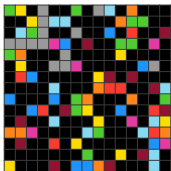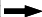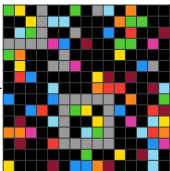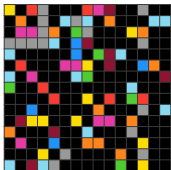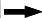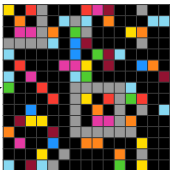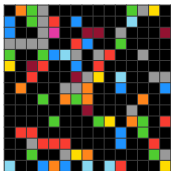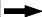

?

Supplement: supplementary_material [file e2092e0c_problem.pdf › CompressARC/results_for_the_blog_post/plots_evaluation/e2092e0c_problem.pdf]

sample

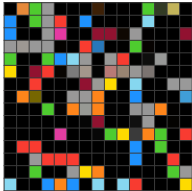

sample average

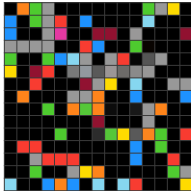

guess 1

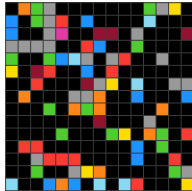

guess 2

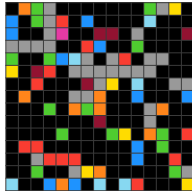

Supplement: supplementary_material [file e2092e0c_solutions.pdf › CompressARC/results_for_the_blog_post/plots_evaluation/e2092e0c_solutions.pdf]

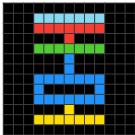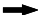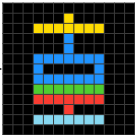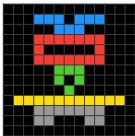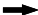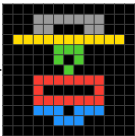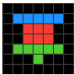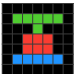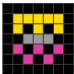

?

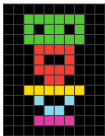

?

Supplement: supplementary_material [file e21a174a_problem.pdf › CompressARC/results_for_the_blog_post/plots_evaluation/e21a174a_problem.pdf]

sample

sample average

guess 1

guess 2

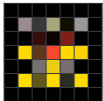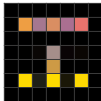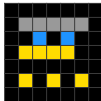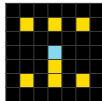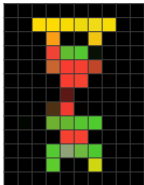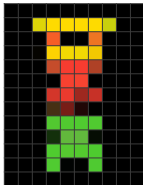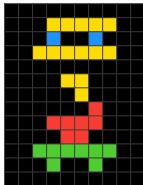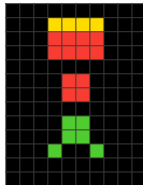

Supplement: supplementary_material [file e21a174a_solutions.pdf › CompressARC/results_for_the_blog_post/plots_evaluation/e21a174a_solutions.pdf]
