# Supplementary material (part 17 of 17)
Source: ML conference proceedings conference paper supplement (https://openreview.net/forum?id=jLC662Yo5h)

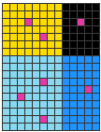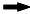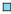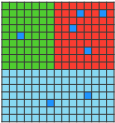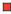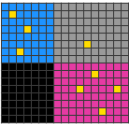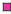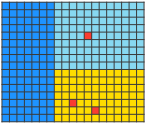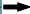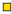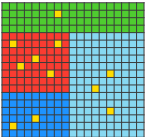

?

Supplement: supplementary_material [file de1cd16c_problem.pdf › CompressARC/results_for_the_blog_post/plots_training/de1cd16c_problem.pdf]

sample

sample average

guess 1

guess 2

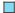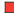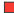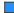

Supplement: supplementary_material [file de1cd16c_solutions.pdf › CompressARC/results_for_the_blog_post/plots_training/de1cd16c_solutions.pdf]

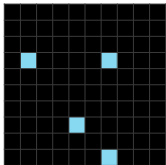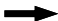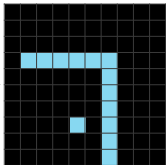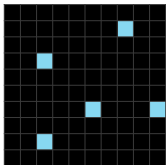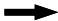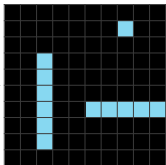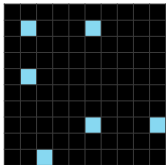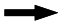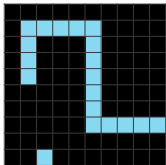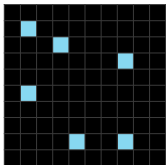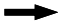

?

Supplement: supplementary_material [file ded97339_problem.pdf › CompressARC/results_for_the_blog_post/plots_training/ded97339_problem.pdf]

sample

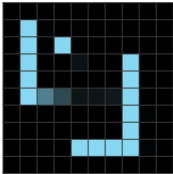

sample average

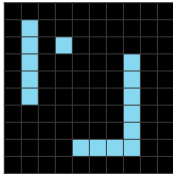

guess 1

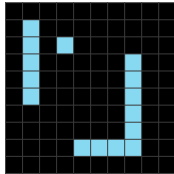

guess 2

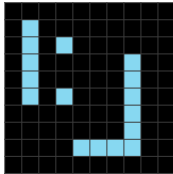

Supplement: supplementary_material [file ded97339_solutions.pdf › CompressARC/results_for_the_blog_post/plots_training/ded97339_solutions.pdf]

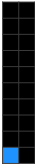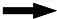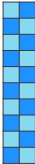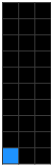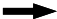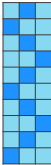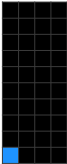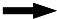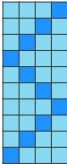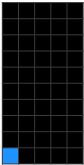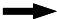

?

Supplement: supplementary_material [file e179c5f4_problem.pdf › CompressARC/results_for_the_blog_post/plots_training/e179c5f4_problem.pdf]

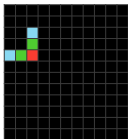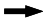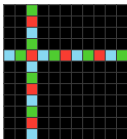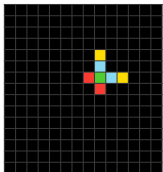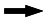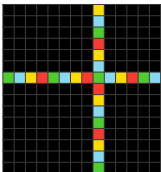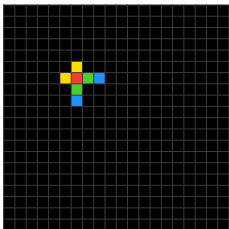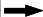

?

Supplement: supplementary_material [file e21d9049_problem.pdf › CompressARC/results_for_the_blog_post/plots_training/e21d9049_problem.pdf]

sample

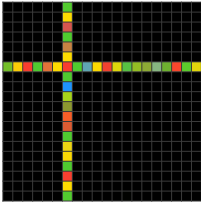

sample average

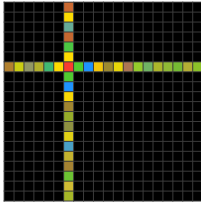

guess 1

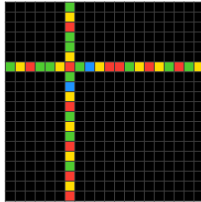

guess 2

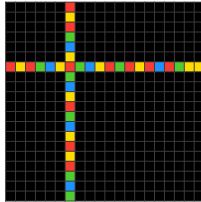

Supplement: supplementary_material [file e21d9049_solutions.pdf › CompressARC/results_for_the_blog_post/plots_training/e21d9049_solutions.pdf]

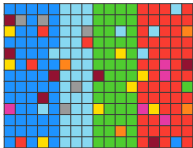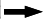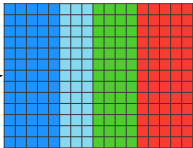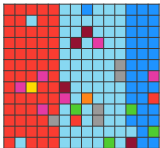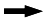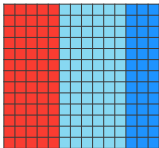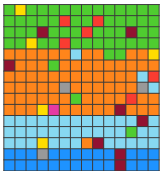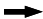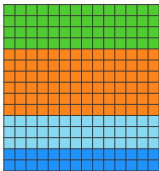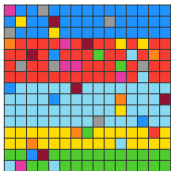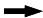

?

Supplement: supplementary_material [file e26a3af2_problem.pdf › CompressARC/results_for_the_blog_post/plots_training/e26a3af2_problem.pdf]

sample

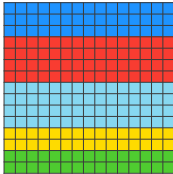

sample average

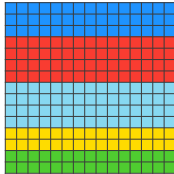

guess 1

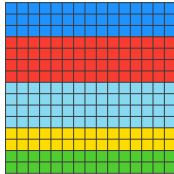

guess 2

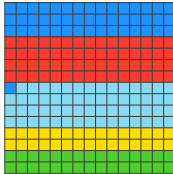

Supplement: supplementary_material [file e26a3af2_solutions.pdf › CompressARC/results_for_the_blog_post/plots_training/e26a3af2_solutions.pdf]

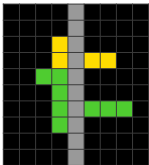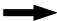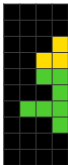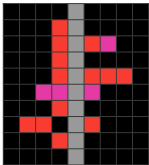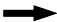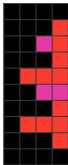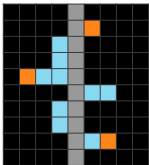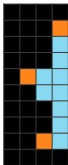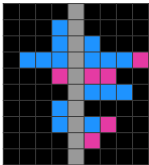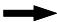

?

Supplement: supplementary_material [file e3497940_problem.pdf › CompressARC/results_for_the_blog_post/plots_training/e3497940_problem.pdf]

sample

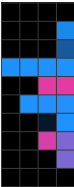

sample average

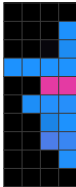

guess 1

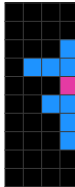

guess 2

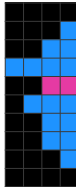

Supplement: supplementary_material [file e3497940_solutions.pdf › CompressARC/results_for_the_blog_post/plots_training/e3497940_solutions.pdf]

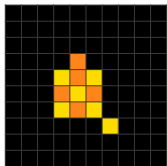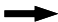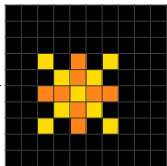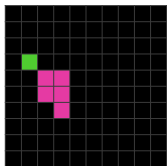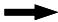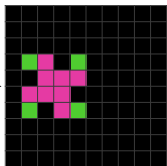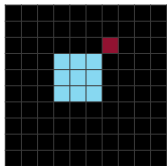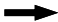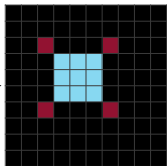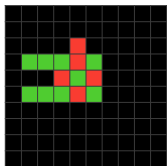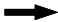

?

Supplement: supplementary_material [file e40b9e2f_problem.pdf › CompressARC/results_for_the_blog_post/plots_training/e40b9e2f_problem.pdf]

sample

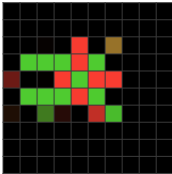

sample average

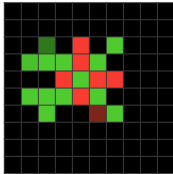

guess 1

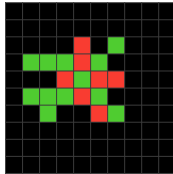

guess 2

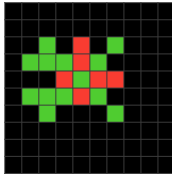

Supplement: supplementary_material [file e40b9e2f_solutions.pdf › CompressARC/results_for_the_blog_post/plots_training/e40b9e2f_solutions.pdf]

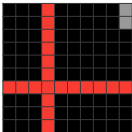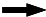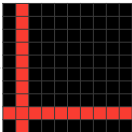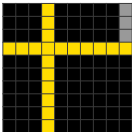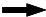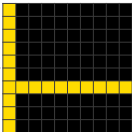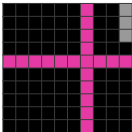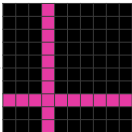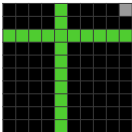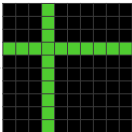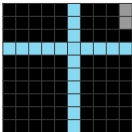

?

Supplement: supplementary_material [file e48d4e1a_problem.pdf › CompressARC/results_for_the_blog_post/plots_training/e48d4e1a_problem.pdf]

sample

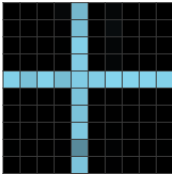

sample average

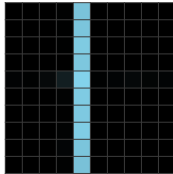

guess 1

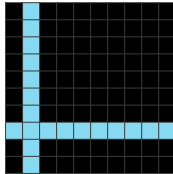

guess 2

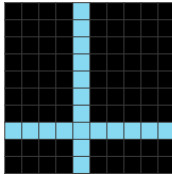

Supplement: supplementary_material [file e48d4e1a_solutions.pdf › CompressARC/results_for_the_blog_post/plots_training/e48d4e1a_solutions.pdf]

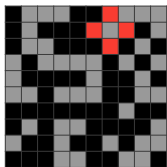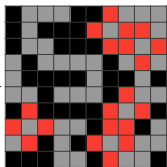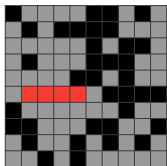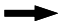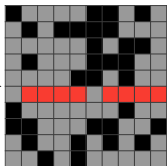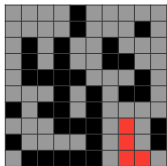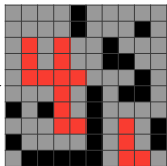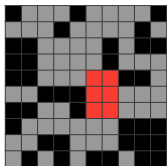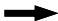

?

Supplement: supplementary_material [file e5062a87_problem.pdf › CompressARC/results_for_the_blog_post/plots_training/e5062a87_problem.pdf]

sample

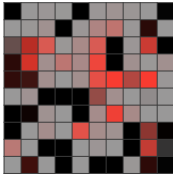

sample average

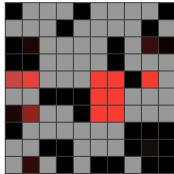

guess 1

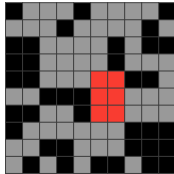

guess 2

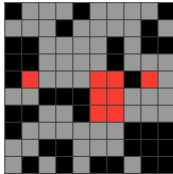

Supplement: supplementary_material [file e5062a87_solutions.pdf › CompressARC/results_for_the_blog_post/plots_training/e5062a87_solutions.pdf]

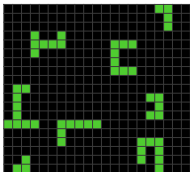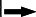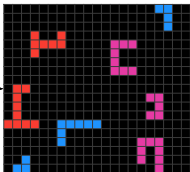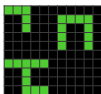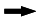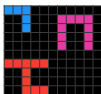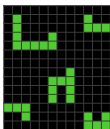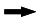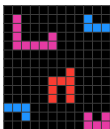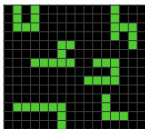

?

Supplement: supplementary_material [file e509e548_problem.pdf › CompressARC/results_for_the_blog_post/plots_training/e509e548_problem.pdf]

sample

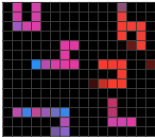

sample average

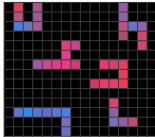

guess 1

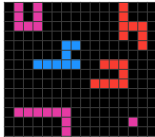

guess 2

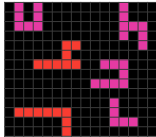

Supplement: supplementary_material [file e509e548_solutions.pdf › CompressARC/results_for_the_blog_post/plots_training/e509e548_solutions.pdf]

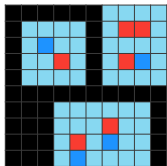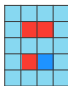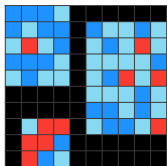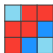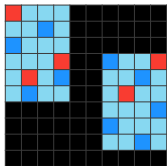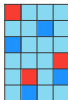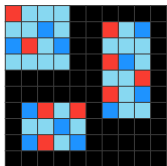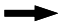

?

Supplement: supplementary_material [file e50d258f_problem.pdf › CompressARC/results_for_the_blog_post/plots_training/e50d258f_problem.pdf]

sample

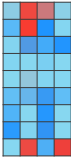

sample average

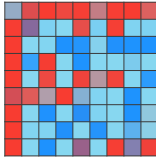

guess 1

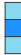

guess 2

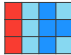

Supplement: supplementary_material [file e50d258f_solutions.pdf › CompressARC/results_for_the_blog_post/plots_training/e50d258f_solutions.pdf]

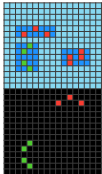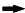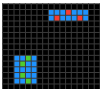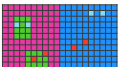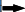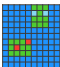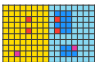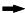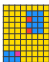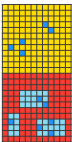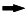

?

Supplement: supplementary_material [file e6721834_problem.pdf › CompressARC/results_for_the_blog_post/plots_training/e6721834_problem.pdf]

sample

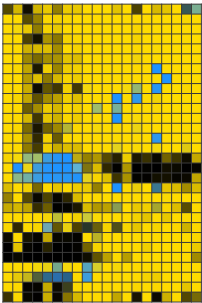

sample average

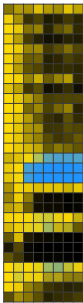

guess 1

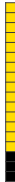

guess 2

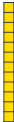

Supplement: supplementary_material [file e6721834_solutions.pdf › CompressARC/results_for_the_blog_post/plots_training/e6721834_solutions.pdf]

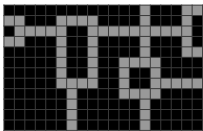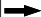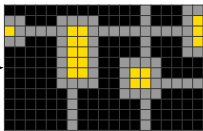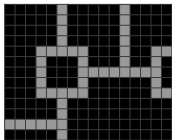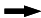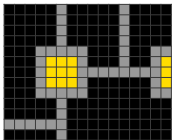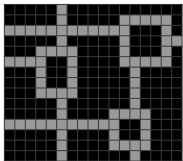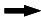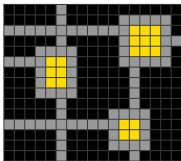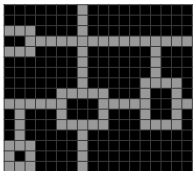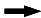

?

Supplement: supplementary_material [file e73095fd_problem.pdf › CompressARC/results_for_the_blog_post/plots_training/e73095fd_problem.pdf]

sample

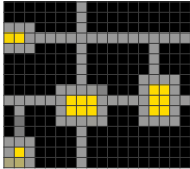

sample average

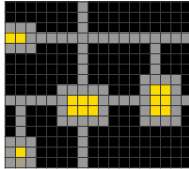

guess 1

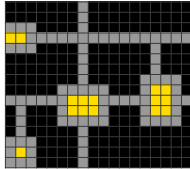

guess 2

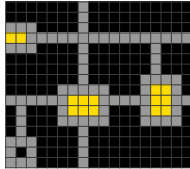

Supplement: supplementary_material [file e73095fd_solutions.pdf › CompressARC/results_for_the_blog_post/plots_training/e73095fd_solutions.pdf]

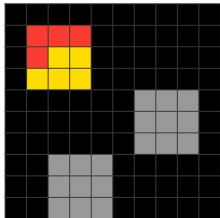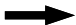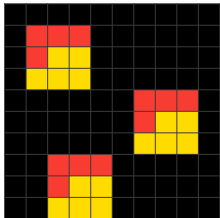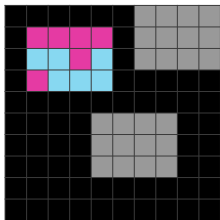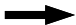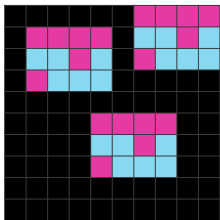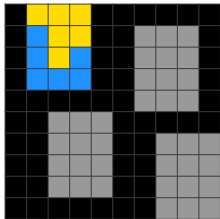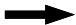

?

Supplement: supplementary_material [file e76a88a6_problem.pdf › CompressARC/results_for_the_blog_post/plots_training/e76a88a6_problem.pdf]

sample

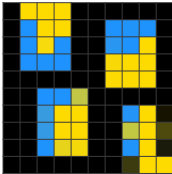

sample average

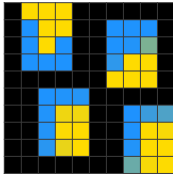

guess 1

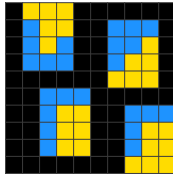

guess 2

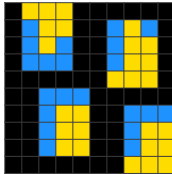

Supplement: supplementary_material [file e76a88a6_solutions.pdf › CompressARC/results_for_the_blog_post/plots_training/e76a88a6_solutions.pdf]

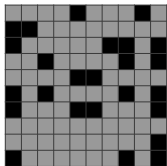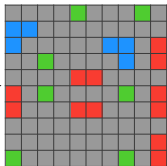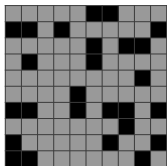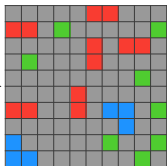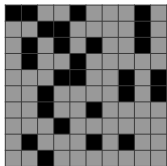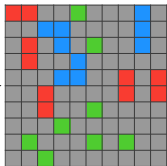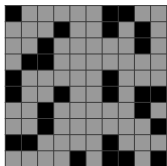

?

Supplement: supplementary_material [file e8593010_problem.pdf › CompressARC/results_for_the_blog_post/plots_training/e8593010_problem.pdf]

sample

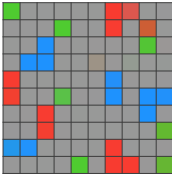

sample average

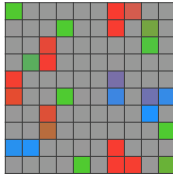

guess 1

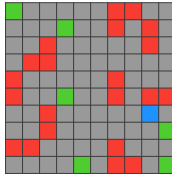

guess 2

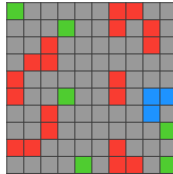

Supplement: supplementary_material [file e8593010_solutions.pdf › CompressARC/results_for_the_blog_post/plots_training/e8593010_solutions.pdf]

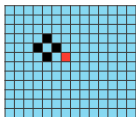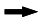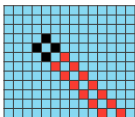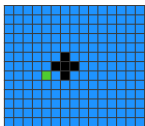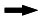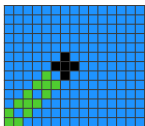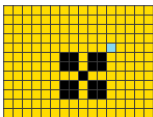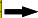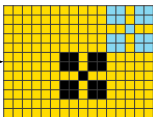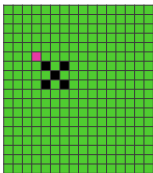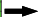

?

Supplement: supplementary_material [file e8dc4411_problem.pdf › CompressARC/results_for_the_blog_post/plots_training/e8dc4411_problem.pdf]

sample

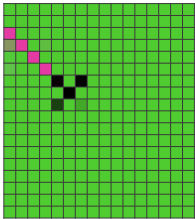

sample average

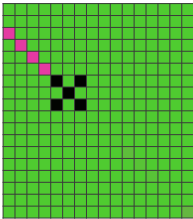

guess 1

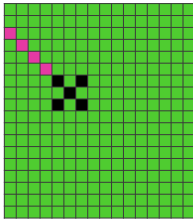

guess 2

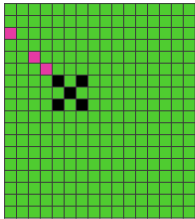

Supplement: supplementary_material [file e8dc4411_solutions.pdf › CompressARC/results_for_the_blog_post/plots_training/e8dc4411_solutions.pdf]

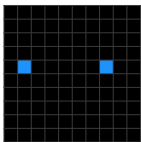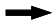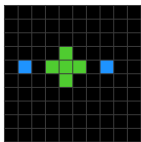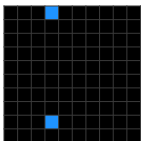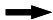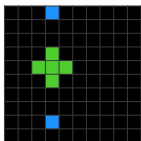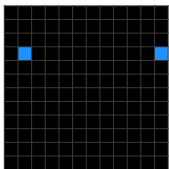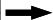

?

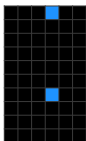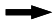

?

Supplement: supplementary_material [file e9614598_problem.pdf › CompressARC/results_for_the_blog_post/plots_training/e9614598_problem.pdf]

sample

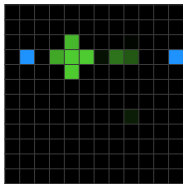

sample average

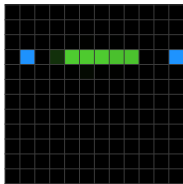

guess 1

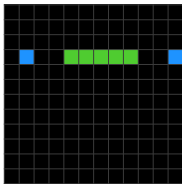

guess 2

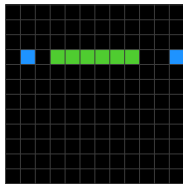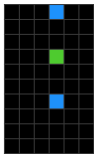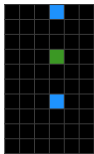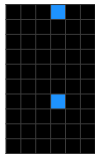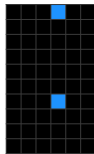

Supplement: supplementary_material [file e9614598_solutions.pdf › CompressARC/results_for_the_blog_post/plots_training/e9614598_solutions.pdf]

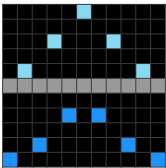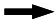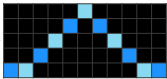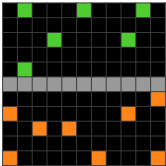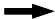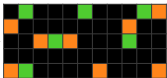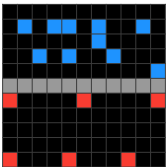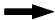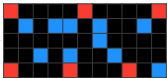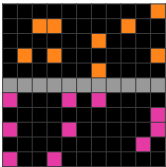

?

Supplement: supplementary_material [file e98196ab_problem.pdf › CompressARC/results_for_the_blog_post/plots_training/e98196ab_problem.pdf]

sample

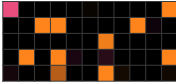

sample average

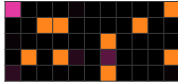

guess 1

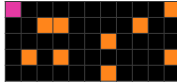

guess 2

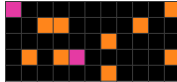

Supplement: supplementary_material [file e98196ab_solutions.pdf › CompressARC/results_for_the_blog_post/plots_training/e98196ab_solutions.pdf]

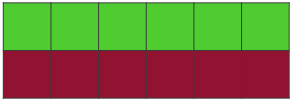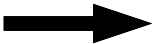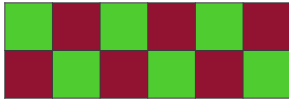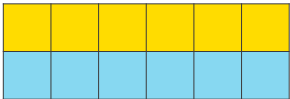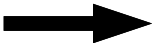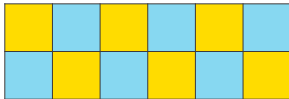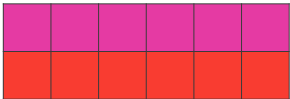

?

Supplement: supplementary_material [file e9afcf9a_problem.pdf › CompressARC/results_for_the_blog_post/plots_training/e9afcf9a_problem.pdf]

sample

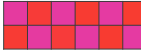

sample average

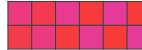

guess 1

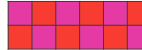

guess 2

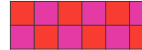

Supplement: supplementary_material [file e9afcf9a_solutions.pdf › CompressARC/results_for_the_blog_post/plots_training/e9afcf9a_solutions.pdf]

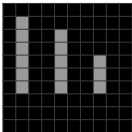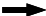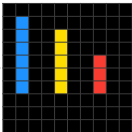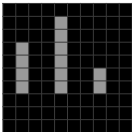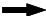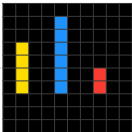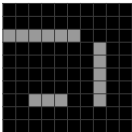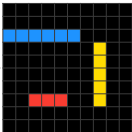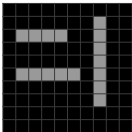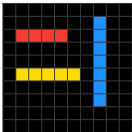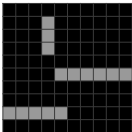

?

Supplement: supplementary_material [file ea32f347_problem.pdf › CompressARC/results_for_the_blog_post/plots_training/ea32f347_problem.pdf]

sample

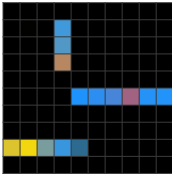

sample average

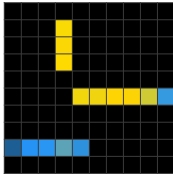

guess 1

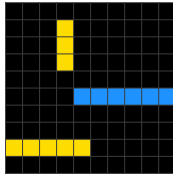

guess 2

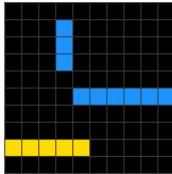

Supplement: supplementary_material [file ea32f347_solutions.pdf › CompressARC/results_for_the_blog_post/plots_training/ea32f347_solutions.pdf]

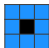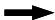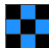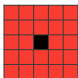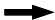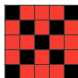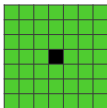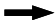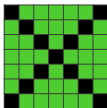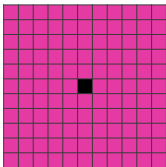

?

Supplement: supplementary_material [file ea786f4a_problem.pdf › CompressARC/results_for_the_blog_post/plots_training/ea786f4a_problem.pdf]

sample

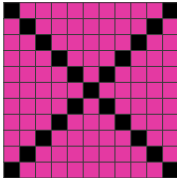

sample average

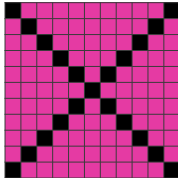

guess 1

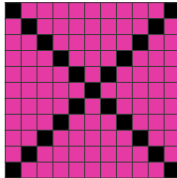

guess 2

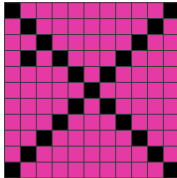

Supplement: supplementary_material [file ea786f4a_solutions.pdf › CompressARC/results_for_the_blog_post/plots_training/ea786f4a_solutions.pdf]

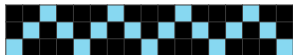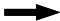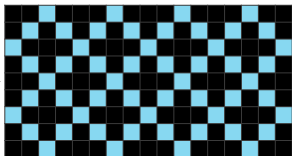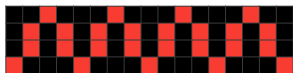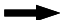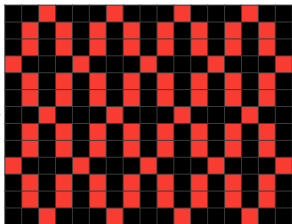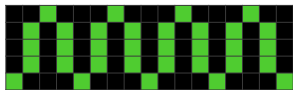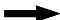

?

Supplement: supplementary_material [file eb281b96_problem.pdf › CompressARC/results_for_the_blog_post/plots_training/eb281b96_problem.pdf]

sample

sample average

guess 1

guess 2

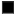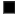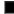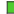

Supplement: supplementary_material [file eb281b96_solutions.pdf › CompressARC/results_for_the_blog_post/plots_training/eb281b96_solutions.pdf]

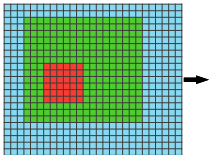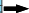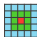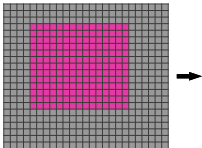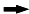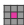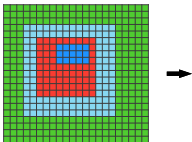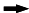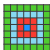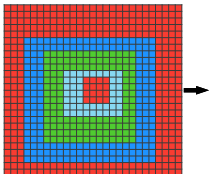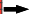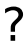

Supplement: supplementary_material [file eb5a1d5d_problem.pdf › CompressARC/results_for_the_blog_post/plots_training/eb5a1d5d_problem.pdf]

sample

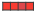

sample average

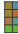

guess 1

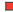

guess 2

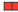

Supplement: supplementary_material [file eb5a1d5d_solutions.pdf › CompressARC/results_for_the_blog_post/plots_training/eb5a1d5d_solutions.pdf]

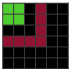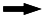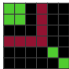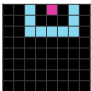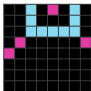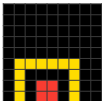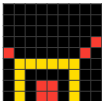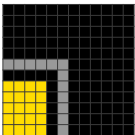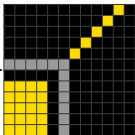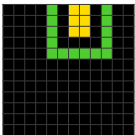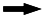

?

Supplement: supplementary_material [file ec883f72_problem.pdf › CompressARC/results_for_the_blog_post/plots_training/ec883f72_problem.pdf]

sample

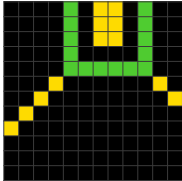

sample average

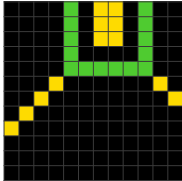

guess 1

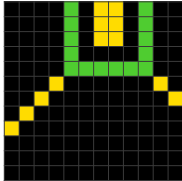

guess 2

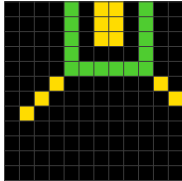

Supplement: supplementary_material [file ec883f72_solutions.pdf › CompressARC/results_for_the_blog_post/plots_training/ec883f72_solutions.pdf]

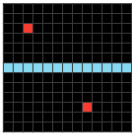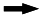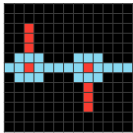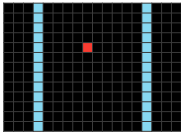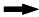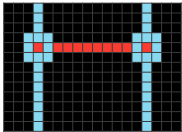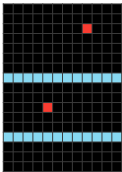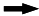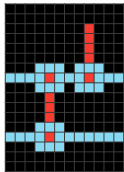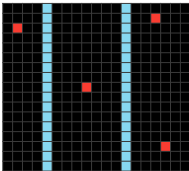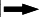

?

Supplement: supplementary_material [file ecdecbb3_problem.pdf › CompressARC/results_for_the_blog_post/plots_training/ecdecbb3_problem.pdf]

sample

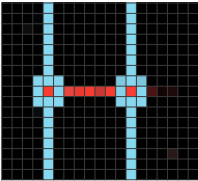

sample average

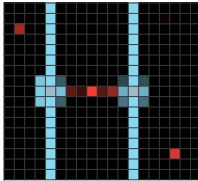

guess 1

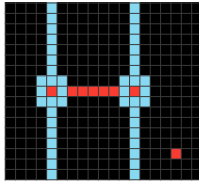

guess 2

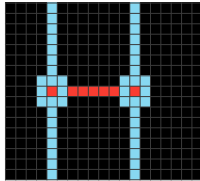

Supplement: supplementary_material [file ecdecbb3_solutions.pdf › CompressARC/results_for_the_blog_post/plots_training/ecdecbb3_solutions.pdf]

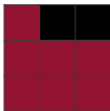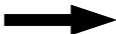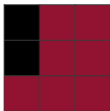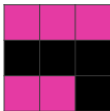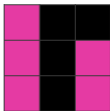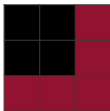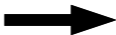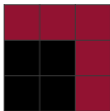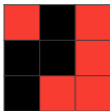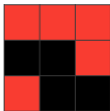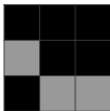

?

Supplement: supplementary_material [file ed36ccf7_problem.pdf › CompressARC/results_for_the_blog_post/plots_training/ed36ccf7_problem.pdf]

sample

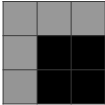

sample average

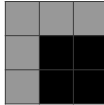

guess 1

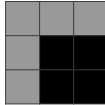

guess 2

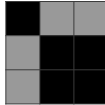

Supplement: supplementary_material [file ed36ccf7_solutions.pdf › CompressARC/results_for_the_blog_post/plots_training/ed36ccf7_solutions.pdf]

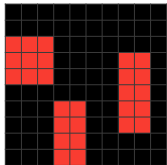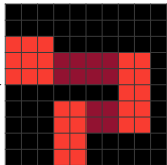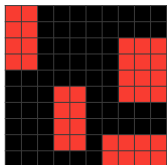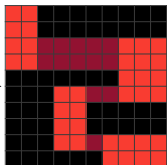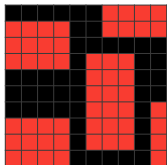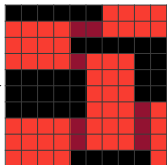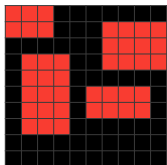

?

Supplement: supplementary_material [file ef135b50_problem.pdf › CompressARC/results_for_the_blog_post/plots_training/ef135b50_problem.pdf]

sample

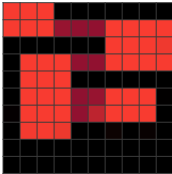

sample average

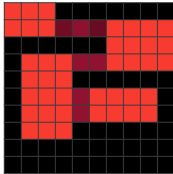

guess 1

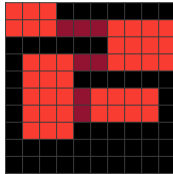

guess 2

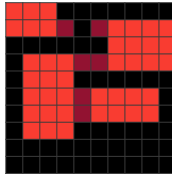

Supplement: supplementary_material [file ef135b50_solutions.pdf › CompressARC/results_for_the_blog_post/plots_training/ef135b50_solutions.pdf]

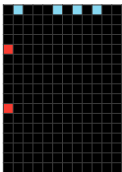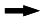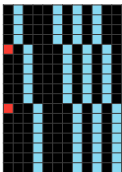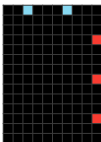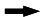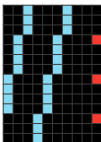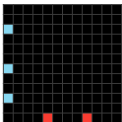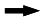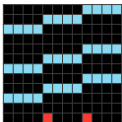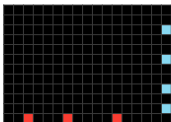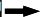

?

Supplement: supplementary_material [file f15e1fac_problem.pdf › CompressARC/results_for_the_blog_post/plots_training/f15e1fac_problem.pdf]

sample

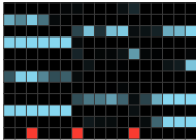

sample average

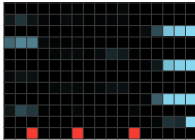

guess 1

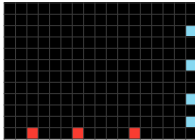

guess 2

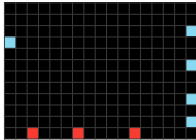

Supplement: supplementary_material [file f15e1fac_solutions.pdf › CompressARC/results_for_the_blog_post/plots_training/f15e1fac_solutions.pdf]

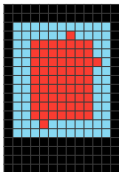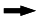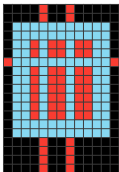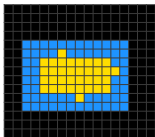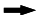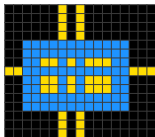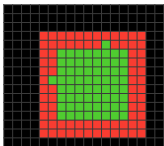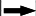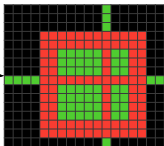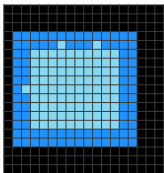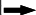

?

Supplement: supplementary_material [file f1cefba8_problem.pdf › CompressARC/results_for_the_blog_post/plots_training/f1cefba8_problem.pdf]

sample

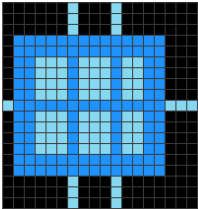

sample average

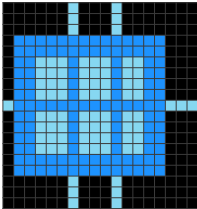

guess 1

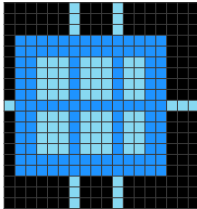

guess 2

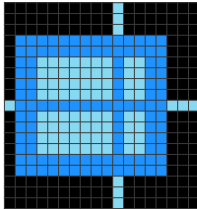

Supplement: supplementary_material [file f1cefba8_solutions.pdf › CompressARC/results_for_the_blog_post/plots_training/f1cefba8_solutions.pdf]

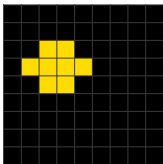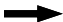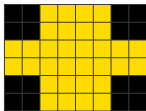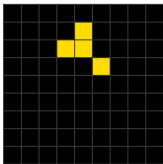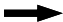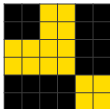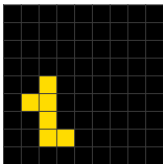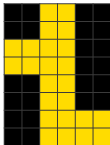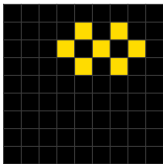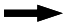

?

Supplement: supplementary_material [file f25fbde4_problem.pdf › CompressARC/results_for_the_blog_post/plots_training/f25fbde4_problem.pdf]

sample

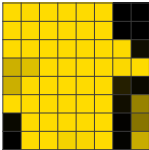

sample average

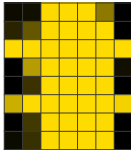

guess 1

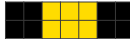

guess 2

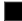

Supplement: supplementary_material [file f25fbde4_solutions.pdf › CompressARC/results_for_the_blog_post/plots_training/f25fbde4_solutions.pdf]

sample

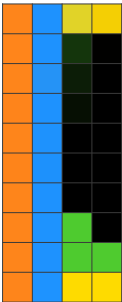

sample average

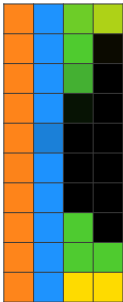

guess 1

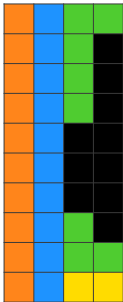

guess 2

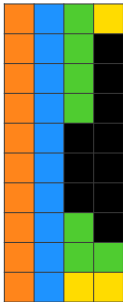

Supplement: supplementary_material [file f25ffba3_solutions.pdf › CompressARC/results_for_the_blog_post/plots_training/f25ffba3_solutions.pdf]

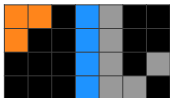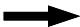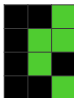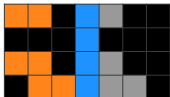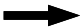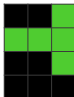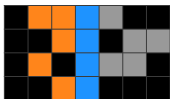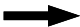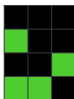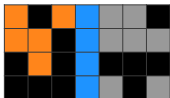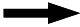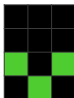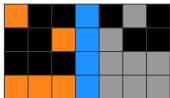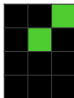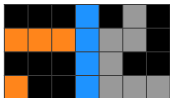

?

Supplement: supplementary_material [file f2829549_problem.pdf › CompressARC/results_for_the_blog_post/plots_training/f2829549_problem.pdf]

sample

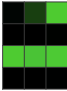

sample average

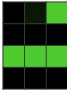

guess 1

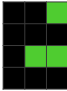

guess 2

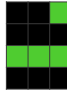

Supplement: supplementary_material [file f2829549_solutions.pdf › CompressARC/results_for_the_blog_post/plots_training/f2829549_solutions.pdf]

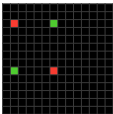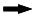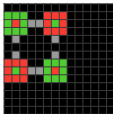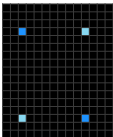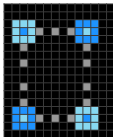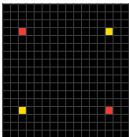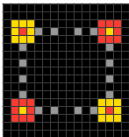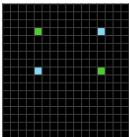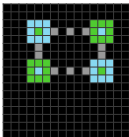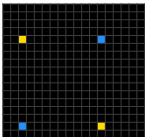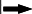

?

Supplement: supplementary_material [file f35d900a_problem.pdf › CompressARC/results_for_the_blog_post/plots_training/f35d900a_problem.pdf]

sample

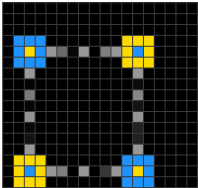

sample average

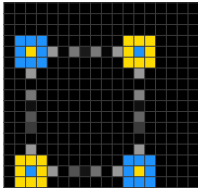

guess 1

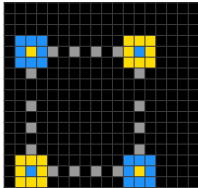

guess 2

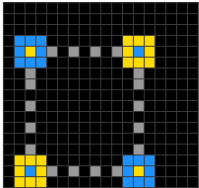

Supplement: supplementary_material [file f35d900a_solutions.pdf › CompressARC/results_for_the_blog_post/plots_training/f35d900a_solutions.pdf]

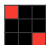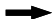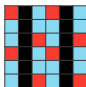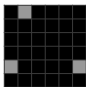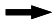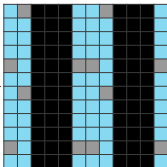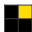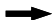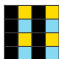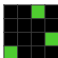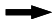

?

Supplement: supplementary_material [file f5b8619d_problem.pdf › CompressARC/results_for_the_blog_post/plots_training/f5b8619d_problem.pdf]

sample

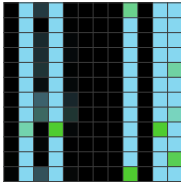

sample average

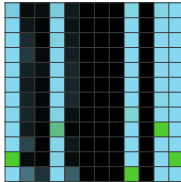

guess 1

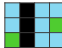

guess 2

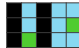

Supplement: supplementary_material [file f5b8619d_solutions.pdf › CompressARC/results_for_the_blog_post/plots_training/f5b8619d_solutions.pdf]

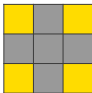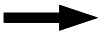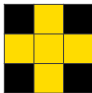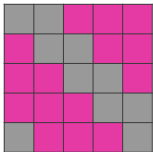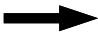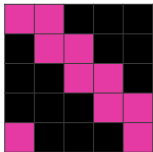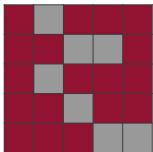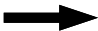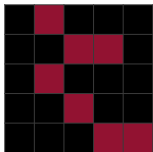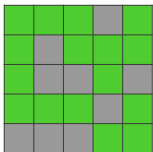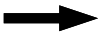

?

Supplement: supplementary_material [file f76d97a5_problem.pdf › CompressARC/results_for_the_blog_post/plots_training/f76d97a5_problem.pdf]

sample

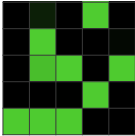

sample average

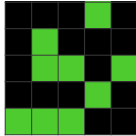

guess 1

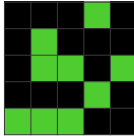

guess 2

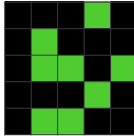

Supplement: supplementary_material [file f76d97a5_solutions.pdf › CompressARC/results_for_the_blog_post/plots_training/f76d97a5_solutions.pdf]

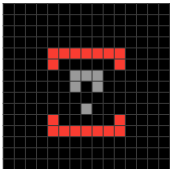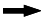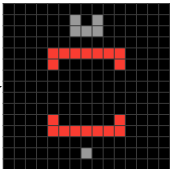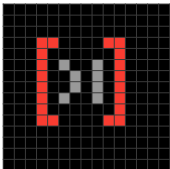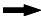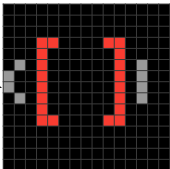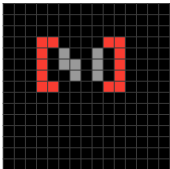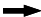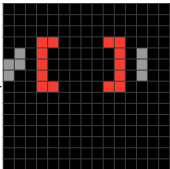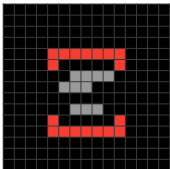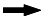

?

Supplement: supplementary_material [file f8a8fe49_problem.pdf › CompressARC/results_for_the_blog_post/plots_training/f8a8fe49_problem.pdf]

sample

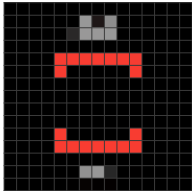

sample average

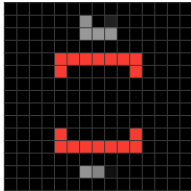

guess 1

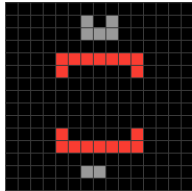

guess 2

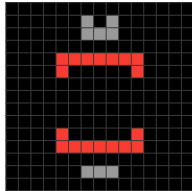

Supplement: supplementary_material [file f8a8fe49_solutions.pdf › CompressARC/results_for_the_blog_post/plots_training/f8a8fe49_solutions.pdf]

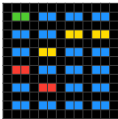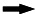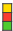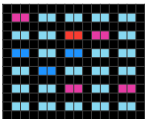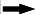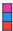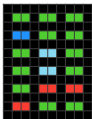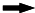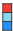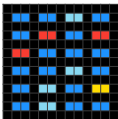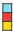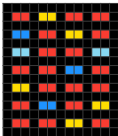

?

Supplement: supplementary_material [file f8b3ba0a_problem.pdf › CompressARC/results_for_the_blog_post/plots_training/f8b3ba0a_problem.pdf]

sample

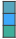

sample average

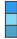

guess 1

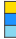

guess 2

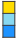

Supplement: supplementary_material [file f8b3ba0a_solutions.pdf › CompressARC/results_for_the_blog_post/plots_training/f8b3ba0a_solutions.pdf]

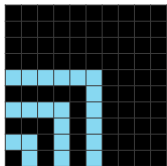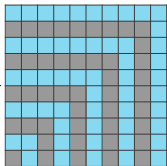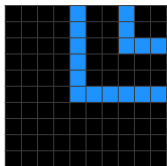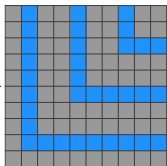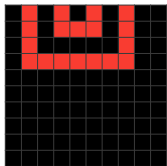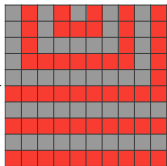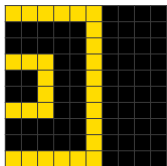

?

Supplement: supplementary_material [file f8c80d96_problem.pdf › CompressARC/results_for_the_blog_post/plots_training/f8c80d96_problem.pdf]

sample

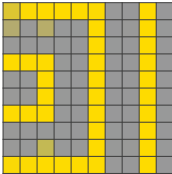

sample average

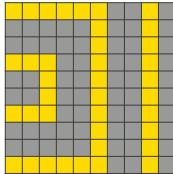

guess 1

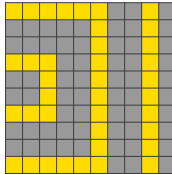

guess 2

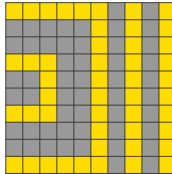

Supplement: supplementary_material [file f8c80d96_solutions.pdf › CompressARC/results_for_the_blog_post/plots_training/f8c80d96_solutions.pdf]

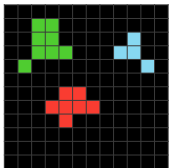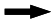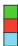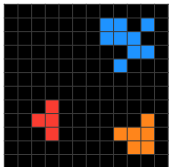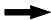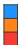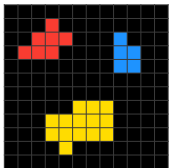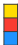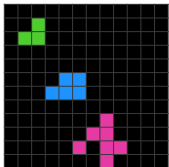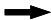

?

Supplement: supplementary_material [file f8ff0b80_problem.pdf › CompressARC/results_for_the_blog_post/plots_training/f8ff0b80_problem.pdf]

sample

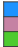

sample average

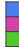

guess 1

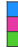

guess 2

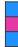

Supplement: supplementary_material [file f8ff0b80_solutions.pdf › CompressARC/results_for_the_blog_post/plots_training/f8ff0b80_solutions.pdf]

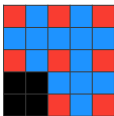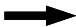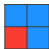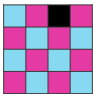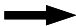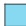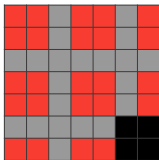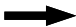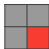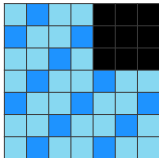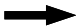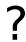

Supplement: supplementary_material [file f9012d9b_problem.pdf › CompressARC/results_for_the_blog_post/plots_training/f9012d9b_problem.pdf]

sample

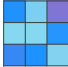

sample average

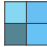

guess 1

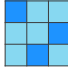

guess 2

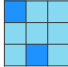

Supplement: supplementary_material [file f9012d9b_solutions.pdf › CompressARC/results_for_the_blog_post/plots_training/f9012d9b_solutions.pdf]

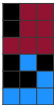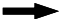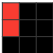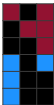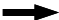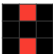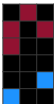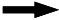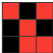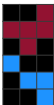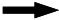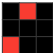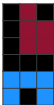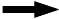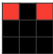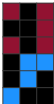

?

Supplement: supplementary_material [file fafffa47_problem.pdf › CompressARC/results_for_the_blog_post/plots_training/fafffa47_problem.pdf]

sample

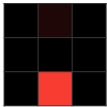

sample average

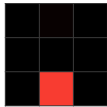

guess 1

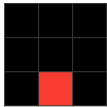

guess 2

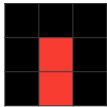

Supplement: supplementary_material [file fafffa47_solutions.pdf › CompressARC/results_for_the_blog_post/plots_training/fafffa47_solutions.pdf]

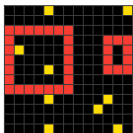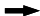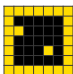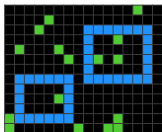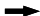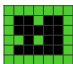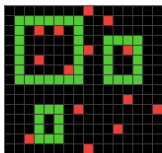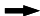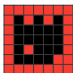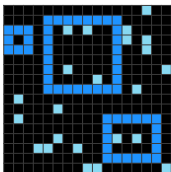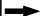

?

Supplement: supplementary_material [file fcb5c309_problem.pdf › CompressARC/results_for_the_blog_post/plots_training/fcb5c309_problem.pdf]

sample

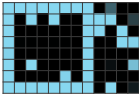

sample average

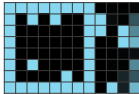

guess 1

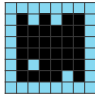

guess 2

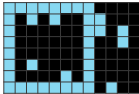

Supplement: supplementary_material [file fcb5c309_solutions.pdf › CompressARC/results_for_the_blog_post/plots_training/fcb5c309_solutions.pdf]

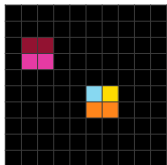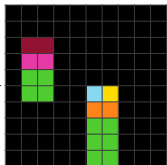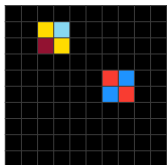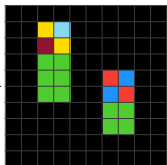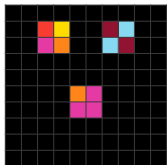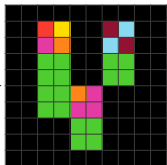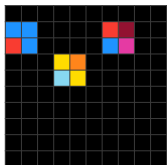

?

Supplement: supplementary_material [file fcc82909_problem.pdf › CompressARC/results_for_the_blog_post/plots_training/fcc82909_problem.pdf]

sample

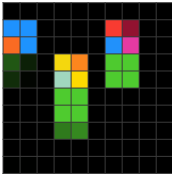

sample average

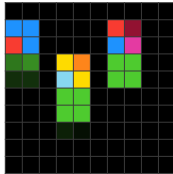

guess 1

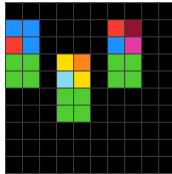

guess 2

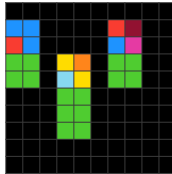

Supplement: supplementary_material [file fcc82909_solutions.pdf › CompressARC/results_for_the_blog_post/plots_training/fcc82909_solutions.pdf]

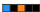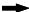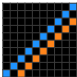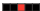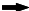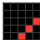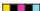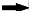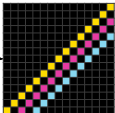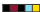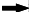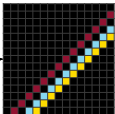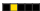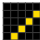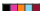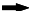

?

Supplement: supplementary_material [file feca6190_problem.pdf › CompressARC/results_for_the_blog_post/plots_training/feca6190_problem.pdf]

sample

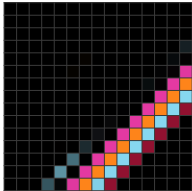

sample average

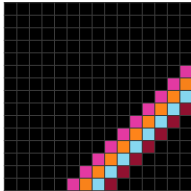

guess 1

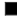

guess 2

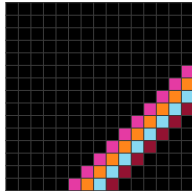

Supplement: supplementary_material [file feca6190_solutions.pdf › CompressARC/results_for_the_blog_post/plots_training/feca6190_solutions.pdf]

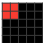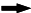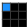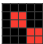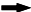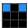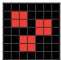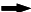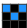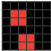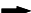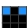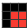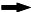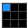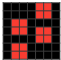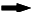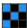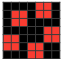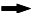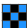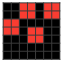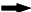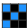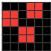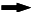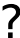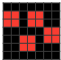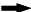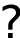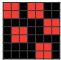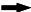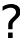

Supplement: supplementary_material [file ff28f65a_problem.pdf › CompressARC/results_for_the_blog_post/plots_training/ff28f65a_problem.pdf]

sample

sample average

guess 1

guess 2

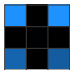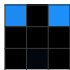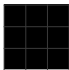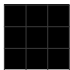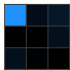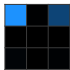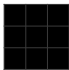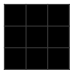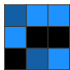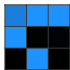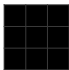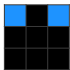

Supplement: supplementary_material [file ff28f65a_solutions.pdf › CompressARC/results_for_the_blog_post/plots_training/ff28f65a_solutions.pdf]

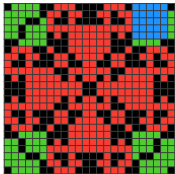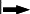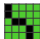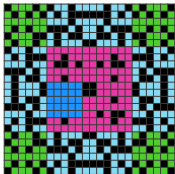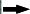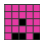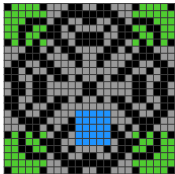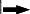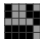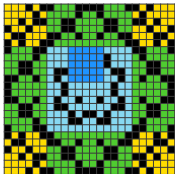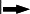

?

Supplement: supplementary_material [file ff805c23_problem.pdf › CompressARC/results_for_the_blog_post/plots_training/ff805c23_problem.pdf]

sample

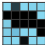

sample average

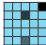

guess 1

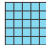

guess 2

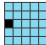

Supplement: supplementary_material [file ff805c23_solutions.pdf › CompressARC/results_for_the_blog_post/plots_training/ff805c23_solutions.pdf]
