# Supplementary material (part 9 of 17)
Source: ML conference proceedings conference paper supplement (https://openreview.net/forum?id=jLC662Yo5h)

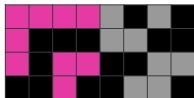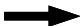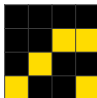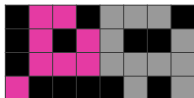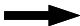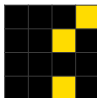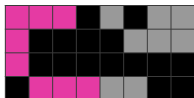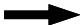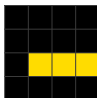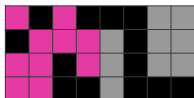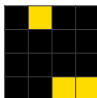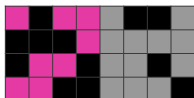

?

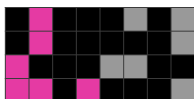

?

Supplement: supplementary_material [file e345f17b_problem.pdf › CompressARC/results_for_the_blog_post/plots_evaluation/e345f17b_problem.pdf]

sample

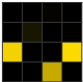

sample average

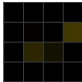

guess 1

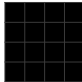

guess 2

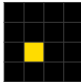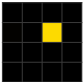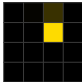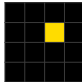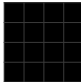

Supplement: supplementary_material [file e345f17b_solutions.pdf › CompressARC/results_for_the_blog_post/plots_evaluation/e345f17b_solutions.pdf]

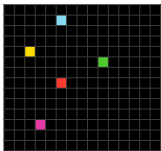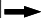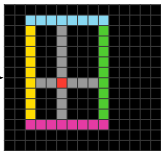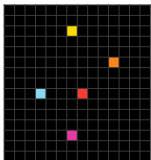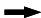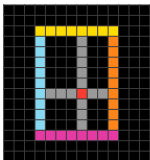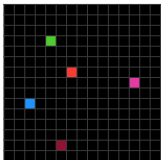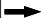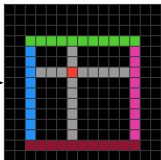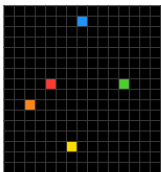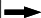

?

Supplement: supplementary_material [file e4075551_problem.pdf › CompressARC/results_for_the_blog_post/plots_evaluation/e4075551_problem.pdf]

sample

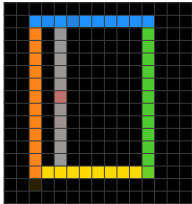

sample average

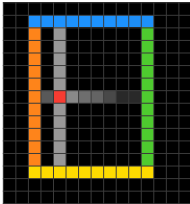

guess 1

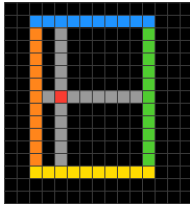

guess 2

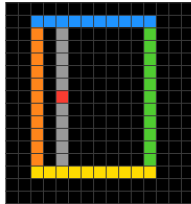

Supplement: supplementary_material [file e4075551_solutions.pdf › CompressARC/results_for_the_blog_post/plots_evaluation/e4075551_solutions.pdf]

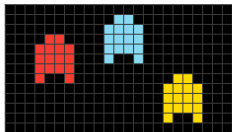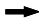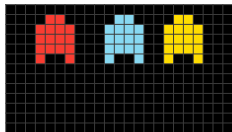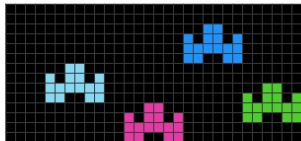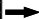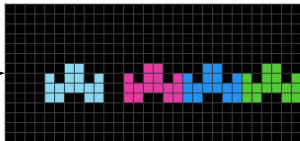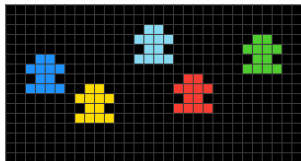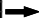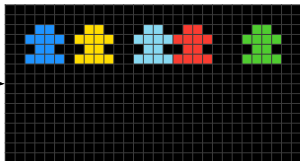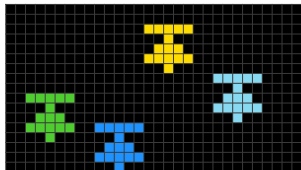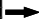

?

Supplement: supplementary_material [file e41c6fd3_problem.pdf › CompressARC/results_for_the_blog_post/plots_evaluation/e41c6fd3_problem.pdf]

sample

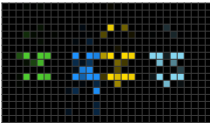

sample average

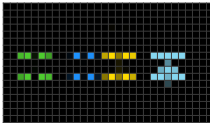

guess 1

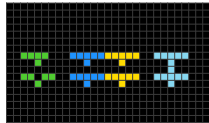

guess 2

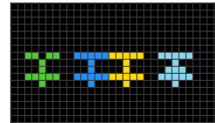

Supplement: supplementary_material [file e41c6fd3_solutions.pdf › CompressARC/results_for_the_blog_post/plots_evaluation/e41c6fd3_solutions.pdf]

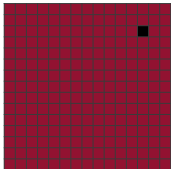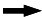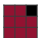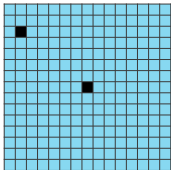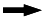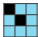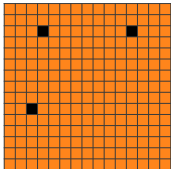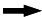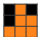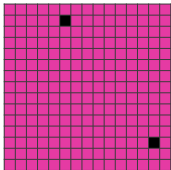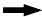

?

Supplement: supplementary_material [file e57337a4_problem.pdf › CompressARC/results_for_the_blog_post/plots_evaluation/e57337a4_problem.pdf]

sample

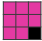

sample average

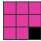

guess 1

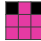

guess 2

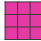

Supplement: supplementary_material [file e57337a4_solutions.pdf › CompressARC/results_for_the_blog_post/plots_evaluation/e57337a4_solutions.pdf]

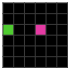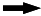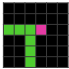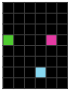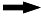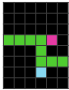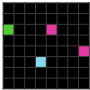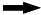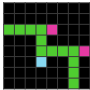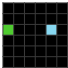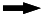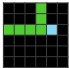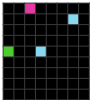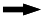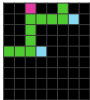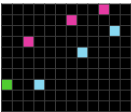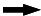

?

Supplement: supplementary_material [file e5790162_problem.pdf › CompressARC/results_for_the_blog_post/plots_evaluation/e5790162_problem.pdf]

sample

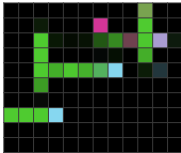

sample average

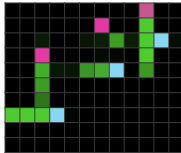

guess 1

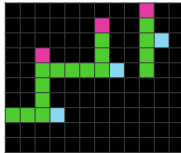

guess 2

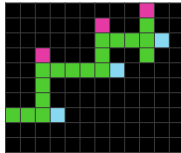

Supplement: supplementary_material [file e5790162_solutions.pdf › CompressARC/results_for_the_blog_post/plots_evaluation/e5790162_solutions.pdf]

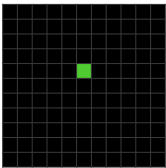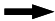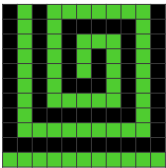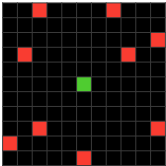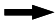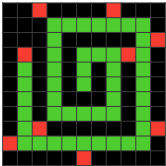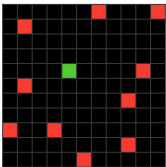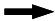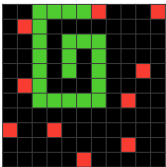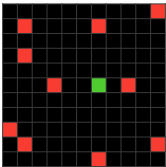

?

Supplement: supplementary_material [file e5c44e8f_problem.pdf › CompressARC/results_for_the_blog_post/plots_evaluation/e5c44e8f_problem.pdf]

sample

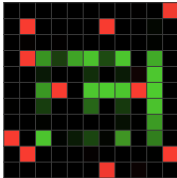

sample average

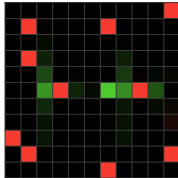

guess 1

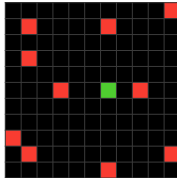

guess 2

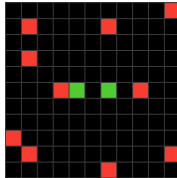

Supplement: supplementary_material [file e5c44e8f_solutions.pdf › CompressARC/results_for_the_blog_post/plots_evaluation/e5c44e8f_solutions.pdf]

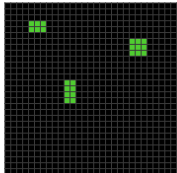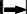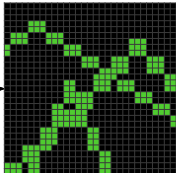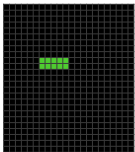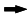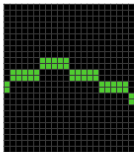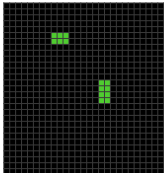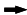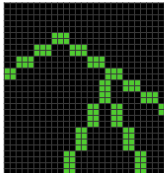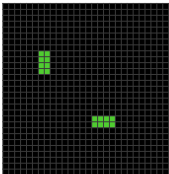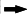

?

Supplement: supplementary_material [file e619ca6e_problem.pdf › CompressARC/results_for_the_blog_post/plots_evaluation/e619ca6e_problem.pdf]

sample

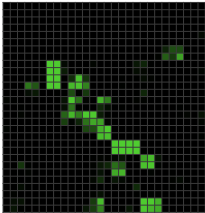

sample average

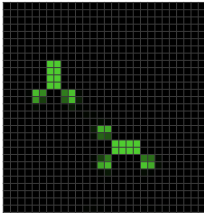

guess 1

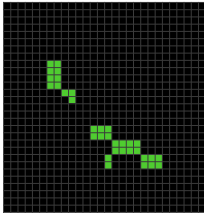

guess 2

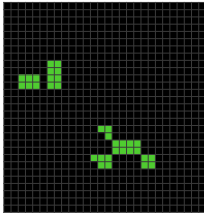

Supplement: supplementary_material [file e619ca6e_solutions.pdf › CompressARC/results_for_the_blog_post/plots_evaluation/e619ca6e_solutions.pdf]

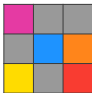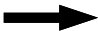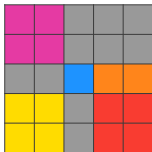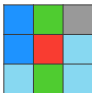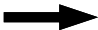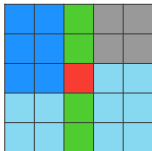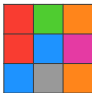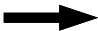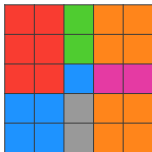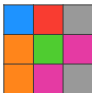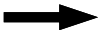

?

Supplement: supplementary_material [file e633a9e5_problem.pdf › CompressARC/results_for_the_blog_post/plots_evaluation/e633a9e5_problem.pdf]

sample

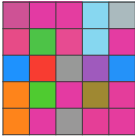

sample average

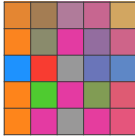

guess 1

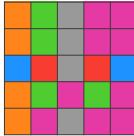

guess 2

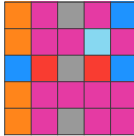

Supplement: supplementary_material [file e633a9e5_solutions.pdf › CompressARC/results_for_the_blog_post/plots_evaluation/e633a9e5_solutions.pdf]

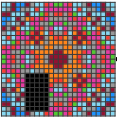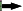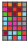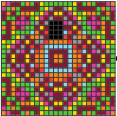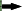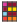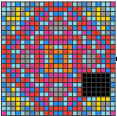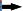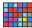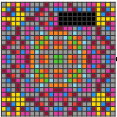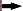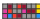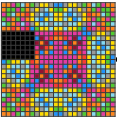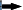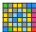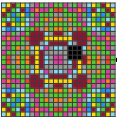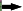

?

Supplement: supplementary_material [file e66aafb8_problem.pdf › CompressARC/results_for_the_blog_post/plots_evaluation/e66aafb8_problem.pdf]

sample

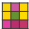

sample average

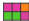

guess 1

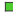

guess 2

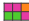

Supplement: supplementary_material [file e66aafb8_solutions.pdf › CompressARC/results_for_the_blog_post/plots_evaluation/e66aafb8_solutions.pdf]

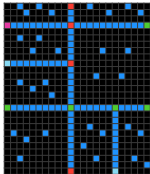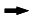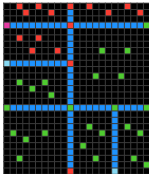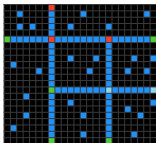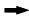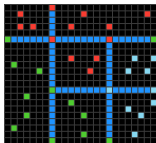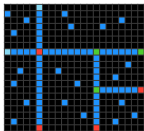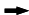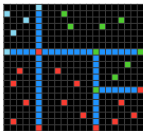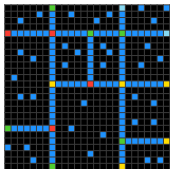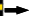

?

Supplement: supplementary_material [file e681b708_problem.pdf › CompressARC/results_for_the_blog_post/plots_evaluation/e681b708_problem.pdf]

sample

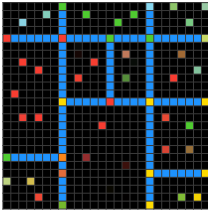

sample average

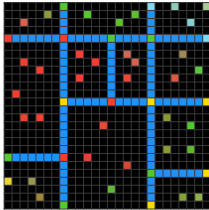

guess 1

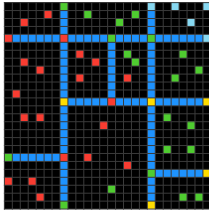

guess 2

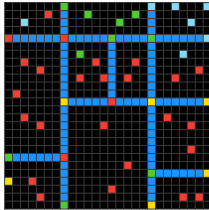

Supplement: supplementary_material [file e681b708_solutions.pdf › CompressARC/results_for_the_blog_post/plots_evaluation/e681b708_solutions.pdf]

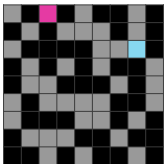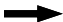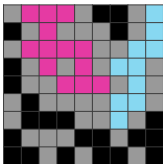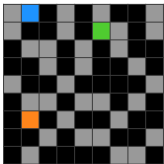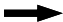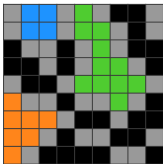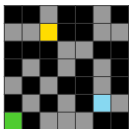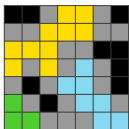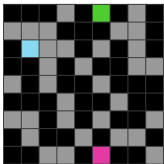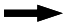

?

Supplement: supplementary_material [file e69241bd_problem.pdf › CompressARC/results_for_the_blog_post/plots_evaluation/e69241bd_problem.pdf]

sample

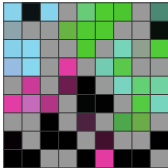

sample average

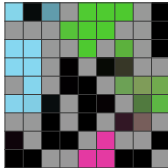

guess 1

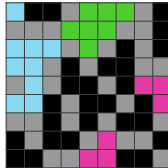

guess 2

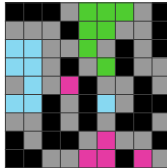

Supplement: supplementary_material [file e69241bd_solutions.pdf › CompressARC/results_for_the_blog_post/plots_evaluation/e69241bd_solutions.pdf]

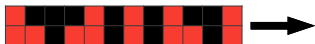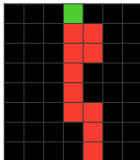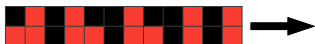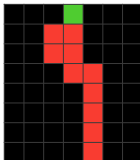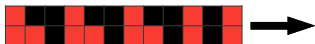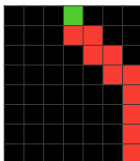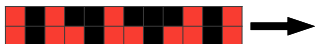

?

Supplement: supplementary_material [file e6de6e8f_problem.pdf › CompressARC/results_for_the_blog_post/plots_evaluation/e6de6e8f_problem.pdf]

sample

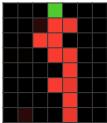

sample average

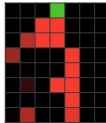

guess 1

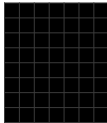

guess 2

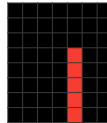

Supplement: supplementary_material [file e6de6e8f_solutions.pdf › CompressARC/results_for_the_blog_post/plots_evaluation/e6de6e8f_solutions.pdf]

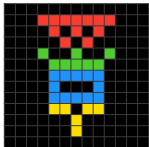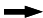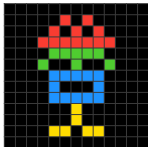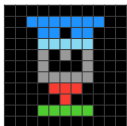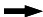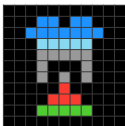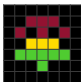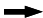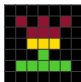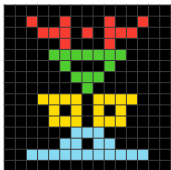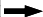

?

Supplement: supplementary_material [file e74e1818_problem.pdf › CompressARC/results_for_the_blog_post/plots_evaluation/e74e1818_problem.pdf]

sample

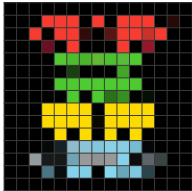

sample average

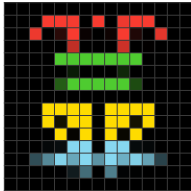

guess 1

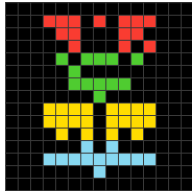

guess 2

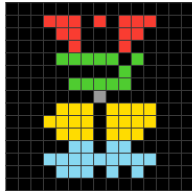

Supplement: supplementary_material [file e74e1818_solutions.pdf › CompressARC/results_for_the_blog_post/plots_evaluation/e74e1818_solutions.pdf]

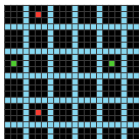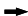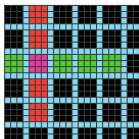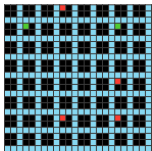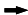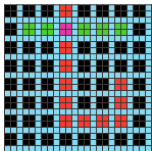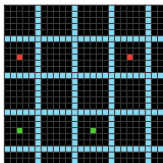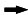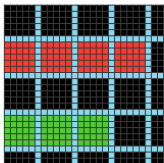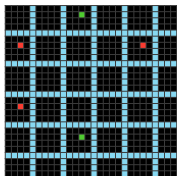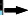

?

Supplement: supplementary_material [file e760a62e_problem.pdf › CompressARC/results_for_the_blog_post/plots_evaluation/e760a62e_problem.pdf]

sample

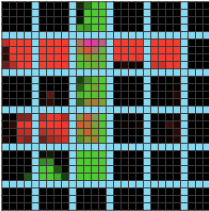

sample average

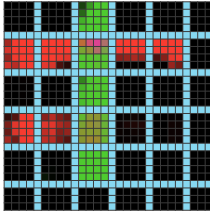

guess 1

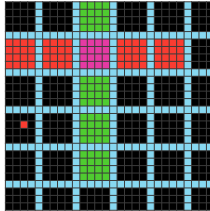

guess 2

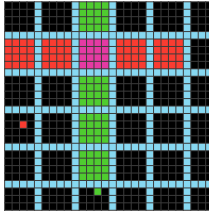

Supplement: supplementary_material [file e760a62e_solutions.pdf › CompressARC/results_for_the_blog_post/plots_evaluation/e760a62e_solutions.pdf]

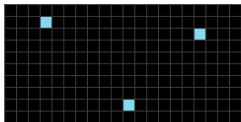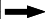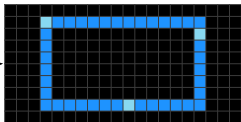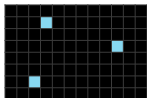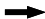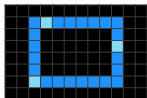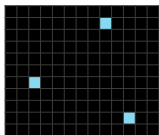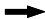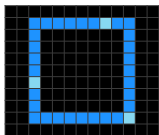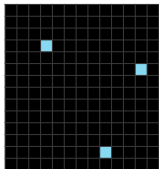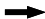

?

Supplement: supplementary_material [file e7639916_problem.pdf › CompressARC/results_for_the_blog_post/plots_evaluation/e7639916_problem.pdf]

sample

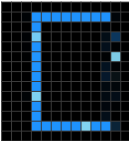

sample average

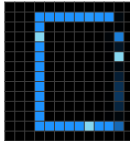

guess 1

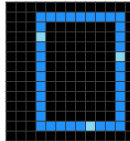

guess 2

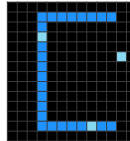

Supplement: supplementary_material [file e7639916_solutions.pdf › CompressARC/results_for_the_blog_post/plots_evaluation/e7639916_solutions.pdf]

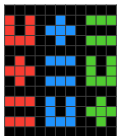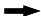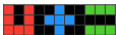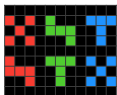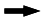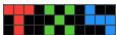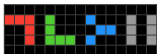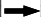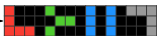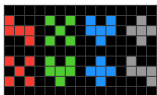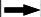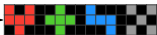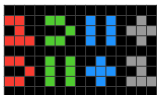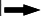

?

Supplement: supplementary_material [file e78887d1_problem.pdf › CompressARC/results_for_the_blog_post/plots_evaluation/e78887d1_problem.pdf]

sample

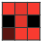

sample average

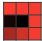

guess 1

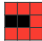

guess 2

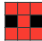

Supplement: supplementary_material [file e78887d1_solutions.pdf › CompressARC/results_for_the_blog_post/plots_evaluation/e78887d1_solutions.pdf]

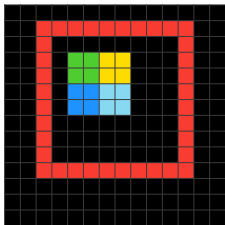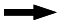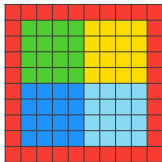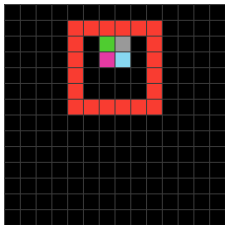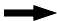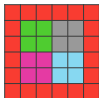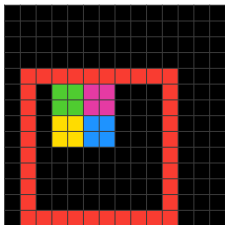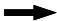

?

Supplement: supplementary_material [file e7a25a18_problem.pdf › CompressARC/results_for_the_blog_post/plots_evaluation/e7a25a18_problem.pdf]

sample

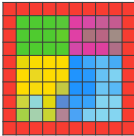

sample average

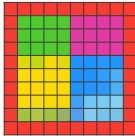

guess 1

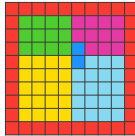

guess 2

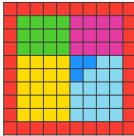

Supplement: supplementary_material [file e7a25a18_solutions.pdf › CompressARC/results_for_the_blog_post/plots_evaluation/e7a25a18_solutions.pdf]

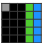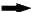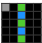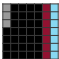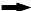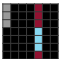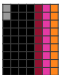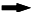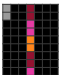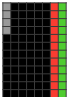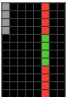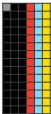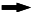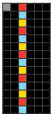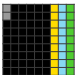

?

Supplement: supplementary_material [file e7b06bea_problem.pdf › CompressARC/results_for_the_blog_post/plots_evaluation/e7b06bea_problem.pdf]

sample

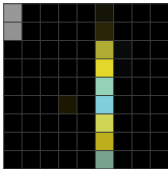

sample average

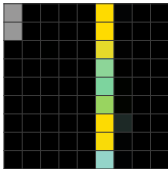

guess 1

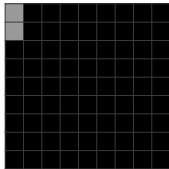

guess 2

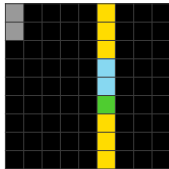

Supplement: supplementary_material [file e7b06bea_solutions.pdf › CompressARC/results_for_the_blog_post/plots_evaluation/e7b06bea_solutions.pdf]

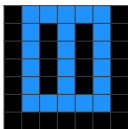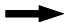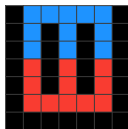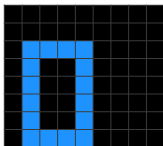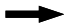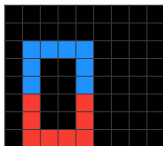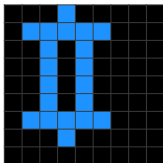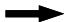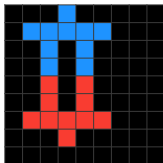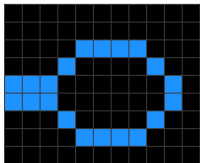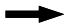

?

Supplement: supplementary_material [file e7dd8335_problem.pdf › CompressARC/results_for_the_blog_post/plots_evaluation/e7dd8335_problem.pdf]

sample

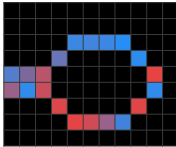

sample average

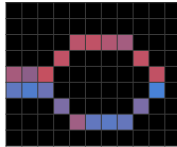

guess 1

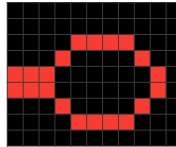

guess 2

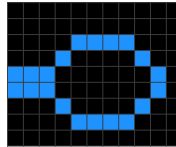

Supplement: supplementary_material [file e7dd8335_solutions.pdf › CompressARC/results_for_the_blog_post/plots_evaluation/e7dd8335_solutions.pdf]

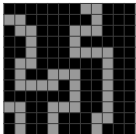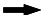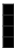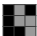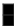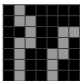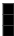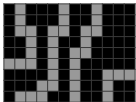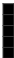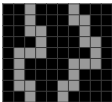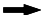

?

Supplement: supplementary_material [file e872b94a_problem.pdf › CompressARC/results_for_the_blog_post/plots_evaluation/e872b94a_problem.pdf]

sample

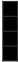

sample average

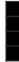

guess 1

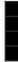

guess 2

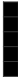

Supplement: supplementary_material [file e872b94a_solutions.pdf › CompressARC/results_for_the_blog_post/plots_evaluation/e872b94a_solutions.pdf]

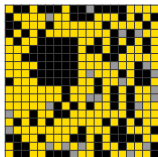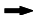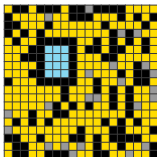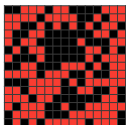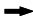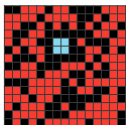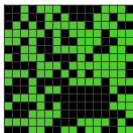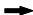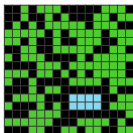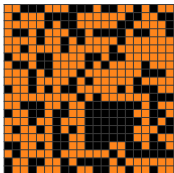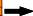

?

Supplement: supplementary_material [file e88171ec_problem.pdf › CompressARC/results_for_the_blog_post/plots_evaluation/e88171ec_problem.pdf]

sample

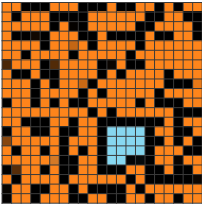

sample average

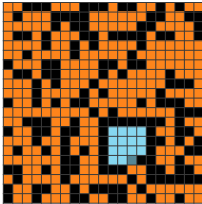

guess 1

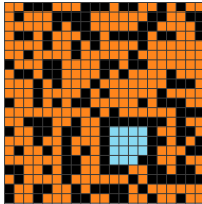

guess 2

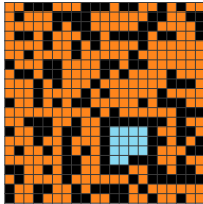

Supplement: supplementary_material [file e88171ec_solutions.pdf › CompressARC/results_for_the_blog_post/plots_evaluation/e88171ec_solutions.pdf]

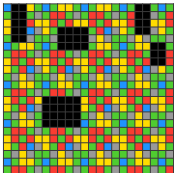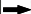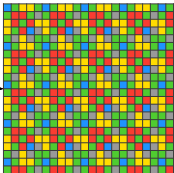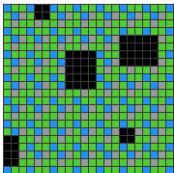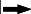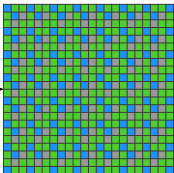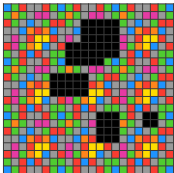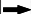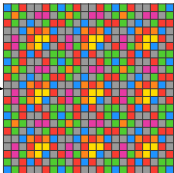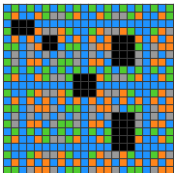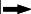

?

Supplement: supplementary_material [file e95e3d8e_problem.pdf › CompressARC/results_for_the_blog_post/plots_evaluation/e95e3d8e_problem.pdf]

sample

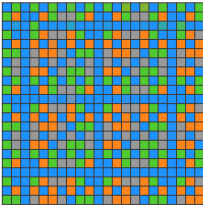

sample average

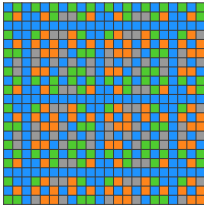

guess 1

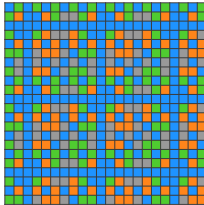

guess 2

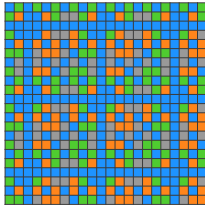

Supplement: supplementary_material [file e95e3d8e_solutions.pdf › CompressARC/results_for_the_blog_post/plots_evaluation/e95e3d8e_solutions.pdf]

sample

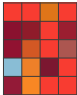

sample average

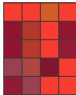

guess 1

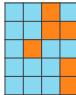

guess 2

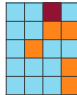

Supplement: supplementary_material [file e99362f0_solutions.pdf › CompressARC/results_for_the_blog_post/plots_evaluation/e99362f0_solutions.pdf]

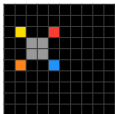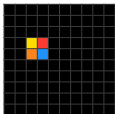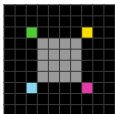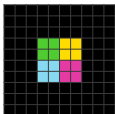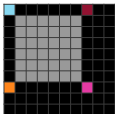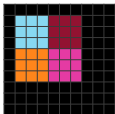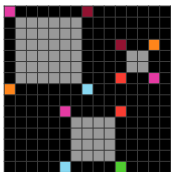

?

Supplement: supplementary_material [file e9ac8c9e_problem.pdf › CompressARC/results_for_the_blog_post/plots_evaluation/e9ac8c9e_problem.pdf]

sample

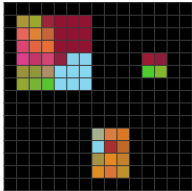

sample average

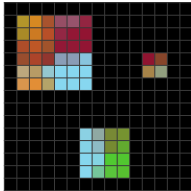

guess 1

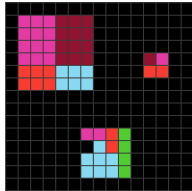

guess 2

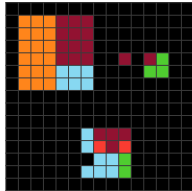

Supplement: supplementary_material [file e9ac8c9e_solutions.pdf › CompressARC/results_for_the_blog_post/plots_evaluation/e9ac8c9e_solutions.pdf]

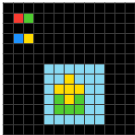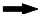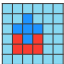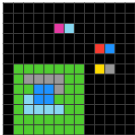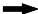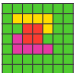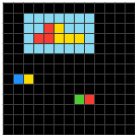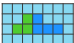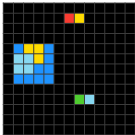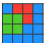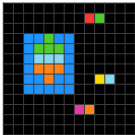

?

Supplement: supplementary_material [file e9b4f6fc_problem.pdf › CompressARC/results_for_the_blog_post/plots_evaluation/e9b4f6fc_problem.pdf]

sample

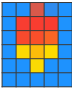

sample average

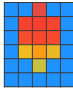

guess 1

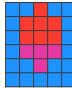

guess 2

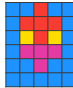

Supplement: supplementary_material [file e9b4f6fc_solutions.pdf › CompressARC/results_for_the_blog_post/plots_evaluation/e9b4f6fc_solutions.pdf]

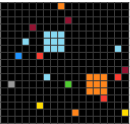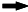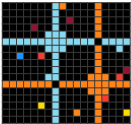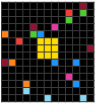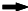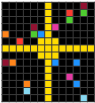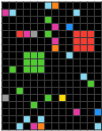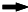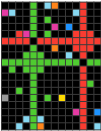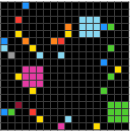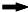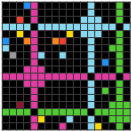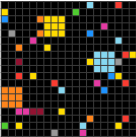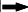

?

Supplement: supplementary_material [file e9bb6954_problem.pdf › CompressARC/results_for_the_blog_post/plots_evaluation/e9bb6954_problem.pdf]

sample

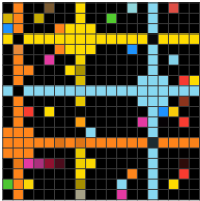

sample average

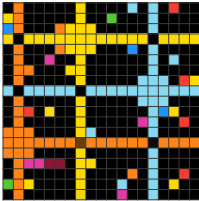

guess 1

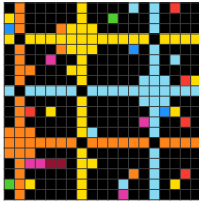

guess 2

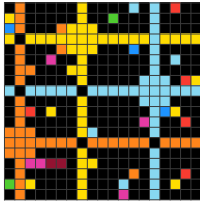

Supplement: supplementary_material [file e9bb6954_solutions.pdf › CompressARC/results_for_the_blog_post/plots_evaluation/e9bb6954_solutions.pdf]

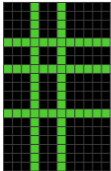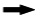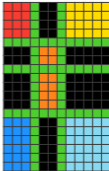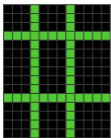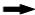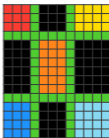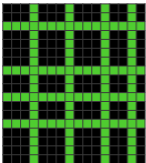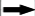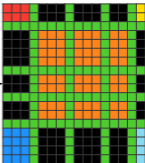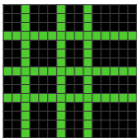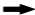

?

Supplement: supplementary_material [file e9c9d9a1_problem.pdf › CompressARC/results_for_the_blog_post/plots_evaluation/e9c9d9a1_problem.pdf]

sample

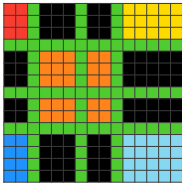

sample average

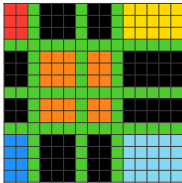

guess 1

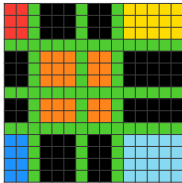

guess 2

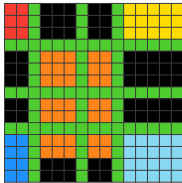

Supplement: supplementary_material [file e9c9d9a1_solutions.pdf › CompressARC/results_for_the_blog_post/plots_evaluation/e9c9d9a1_solutions.pdf]

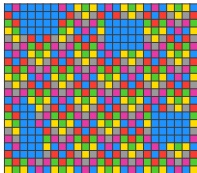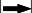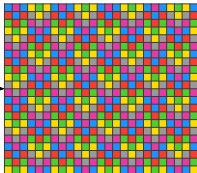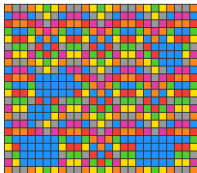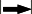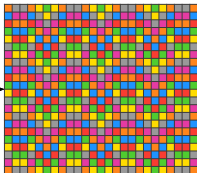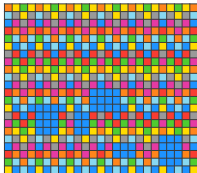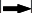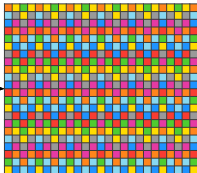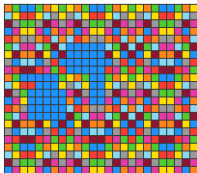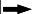

?

Supplement: supplementary_material [file ea959feb_problem.pdf › CompressARC/results_for_the_blog_post/plots_evaluation/ea959feb_problem.pdf]

sample

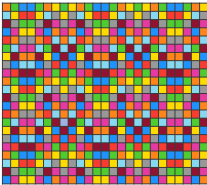

sample average

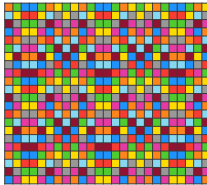

guess 1

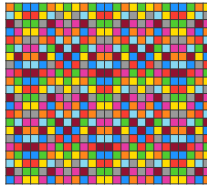

guess 2

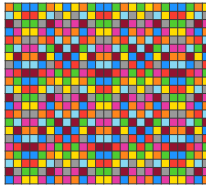

Supplement: supplementary_material [file ea959feb_solutions.pdf › CompressARC/results_for_the_blog_post/plots_evaluation/ea959feb_solutions.pdf]

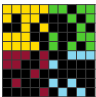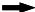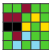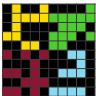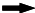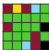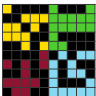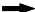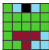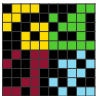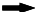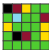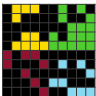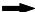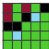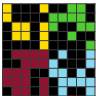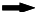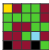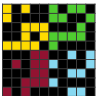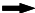

?

Supplement: supplementary_material [file ea9794b1_problem.pdf › CompressARC/results_for_the_blog_post/plots_evaluation/ea9794b1_problem.pdf]

sample

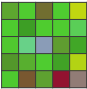

sample average

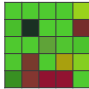

guess 1

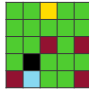

guess 2

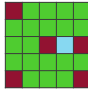

Supplement: supplementary_material [file ea9794b1_solutions.pdf › CompressARC/results_for_the_blog_post/plots_evaluation/ea9794b1_solutions.pdf]

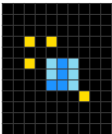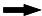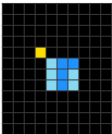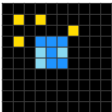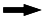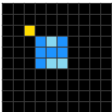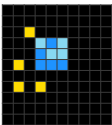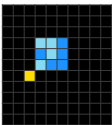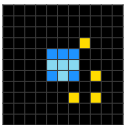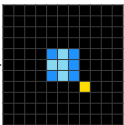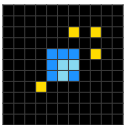

?

Supplement: supplementary_material [file ecaa0ec1_problem.pdf › CompressARC/results_for_the_blog_post/plots_evaluation/ecaa0ec1_problem.pdf]

sample

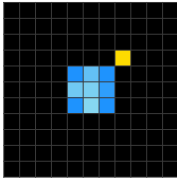

sample average

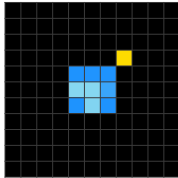

guess 1

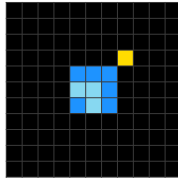

guess 2

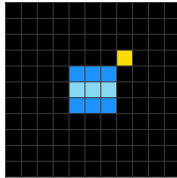

Supplement: supplementary_material [file ecaa0ec1_solutions.pdf › CompressARC/results_for_the_blog_post/plots_evaluation/ecaa0ec1_solutions.pdf]

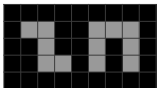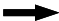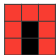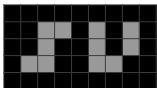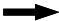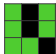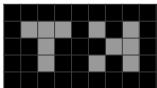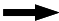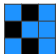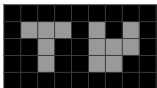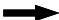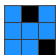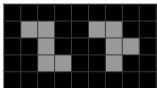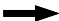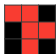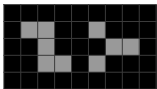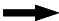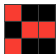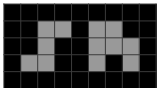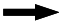

?

Supplement: supplementary_material [file ed74f2f2_problem.pdf › CompressARC/results_for_the_blog_post/plots_evaluation/ed74f2f2_problem.pdf]

sample

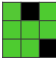

sample average

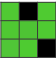

guess 1

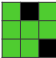

guess 2

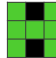

Supplement: supplementary_material [file ed74f2f2_solutions.pdf › CompressARC/results_for_the_blog_post/plots_evaluation/ed74f2f2_solutions.pdf]

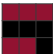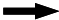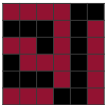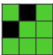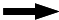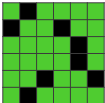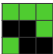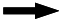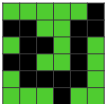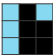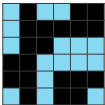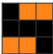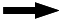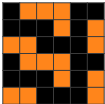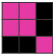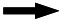

?

Supplement: supplementary_material [file ed98d772_problem.pdf › CompressARC/results_for_the_blog_post/plots_evaluation/ed98d772_problem.pdf]

sample

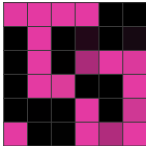

sample average

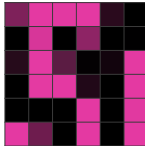

guess 1

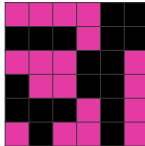

guess 2

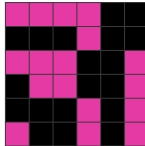

Supplement: supplementary_material [file ed98d772_solutions.pdf › CompressARC/results_for_the_blog_post/plots_evaluation/ed98d772_solutions.pdf]

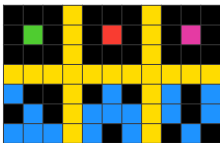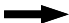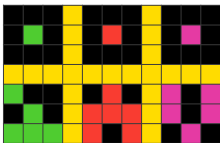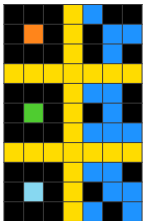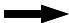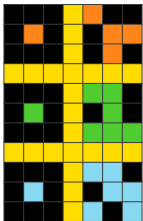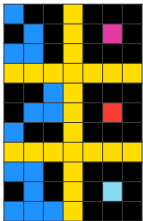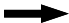

?

Supplement: supplementary_material [file ef26cbf6_problem.pdf › CompressARC/results_for_the_blog_post/plots_evaluation/ef26cbf6_problem.pdf]

sample

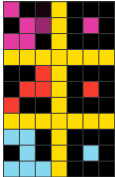

sample average

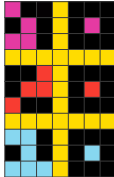

guess 1

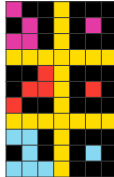

guess 2

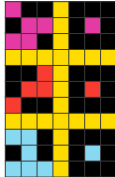

Supplement: supplementary_material [file ef26cbf6_solutions.pdf › CompressARC/results_for_the_blog_post/plots_evaluation/ef26cbf6_solutions.pdf]

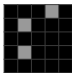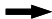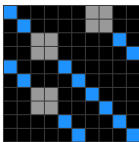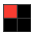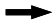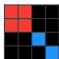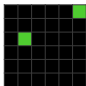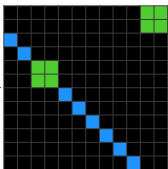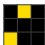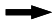

?

Supplement: supplementary_material [file f0afb749_problem.pdf › CompressARC/results_for_the_blog_post/plots_evaluation/f0afb749_problem.pdf]

sample

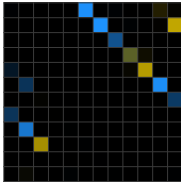

sample average

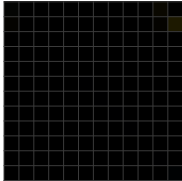

guess 1

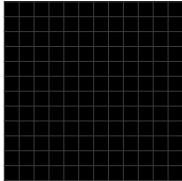

guess 2

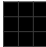

Supplement: supplementary_material [file f0afb749_solutions.pdf › CompressARC/results_for_the_blog_post/plots_evaluation/f0afb749_solutions.pdf]

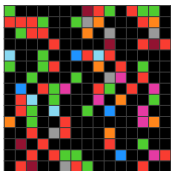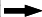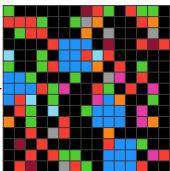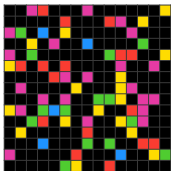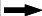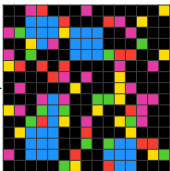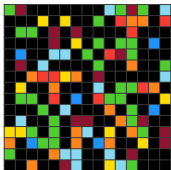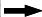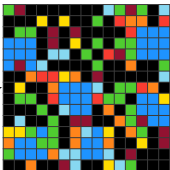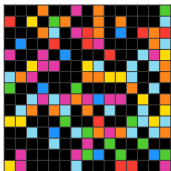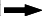

?

Supplement: supplementary_material [file f0df5ff0_problem.pdf › CompressARC/results_for_the_blog_post/plots_evaluation/f0df5ff0_problem.pdf]

sample

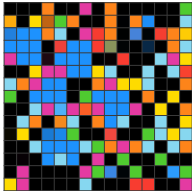

sample average

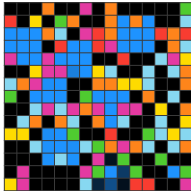

guess 1

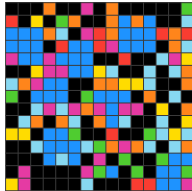

guess 2

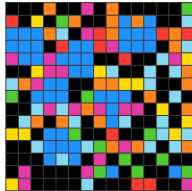

Supplement: supplementary_material [file f0df5ff0_solutions.pdf › CompressARC/results_for_the_blog_post/plots_evaluation/f0df5ff0_solutions.pdf]

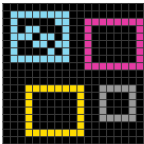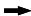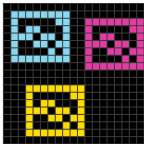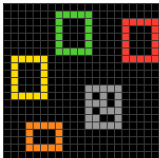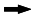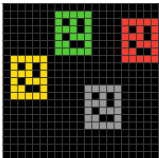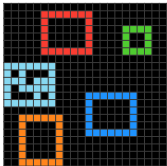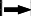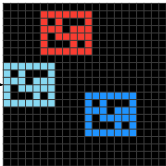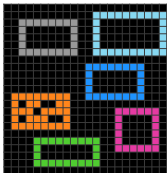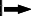

?

Supplement: supplementary_material [file f21745ec_problem.pdf › CompressARC/results_for_the_blog_post/plots_evaluation/f21745ec_problem.pdf]

sample

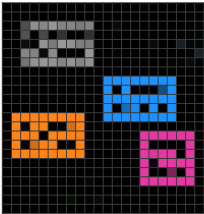

sample average

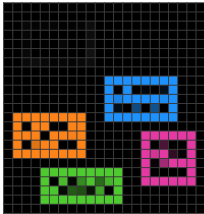

guess 1

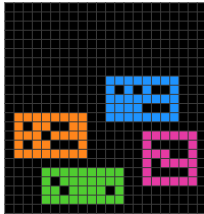

guess 2

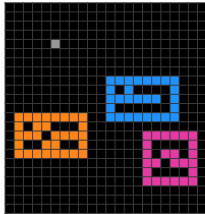

Supplement: supplementary_material [file f21745ec_solutions.pdf › CompressARC/results_for_the_blog_post/plots_evaluation/f21745ec_solutions.pdf]

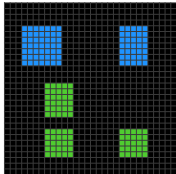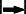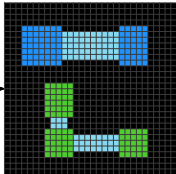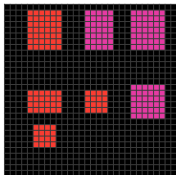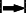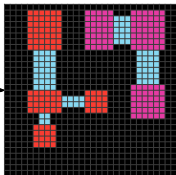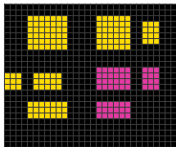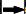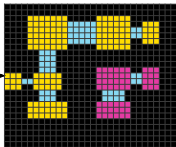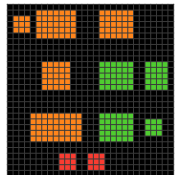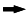

?

Supplement: supplementary_material [file f3b10344_problem.pdf › CompressARC/results_for_the_blog_post/plots_evaluation/f3b10344_problem.pdf]

sample

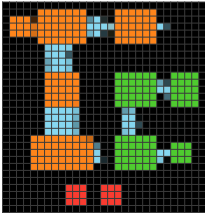

sample average

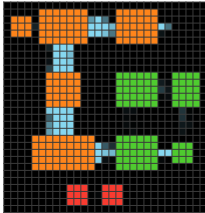

guess 1

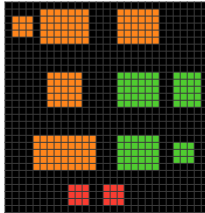

guess 2

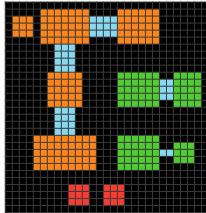

Supplement: supplementary_material [file f3b10344_solutions.pdf › CompressARC/results_for_the_blog_post/plots_evaluation/f3b10344_solutions.pdf]

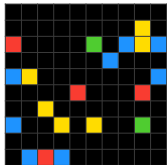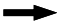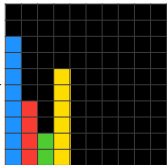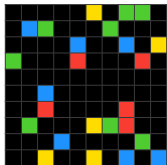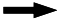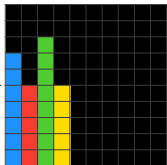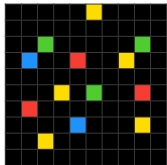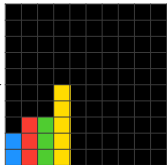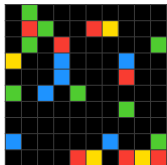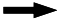

?

Supplement: supplementary_material [file f3cdc58f_problem.pdf › CompressARC/results_for_the_blog_post/plots_evaluation/f3cdc58f_problem.pdf]

sample

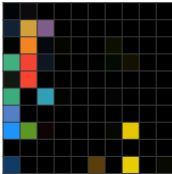

sample average

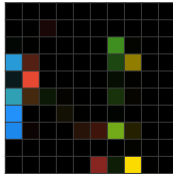

guess 1

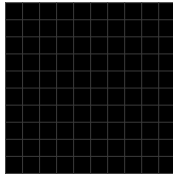

guess 2

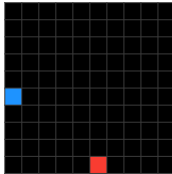

Supplement: supplementary_material [file f3cdc58f_solutions.pdf › CompressARC/results_for_the_blog_post/plots_evaluation/f3cdc58f_solutions.pdf]

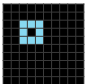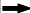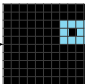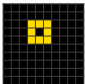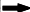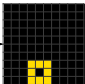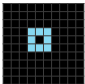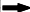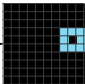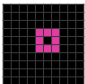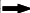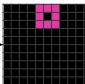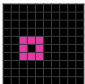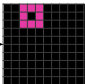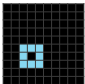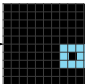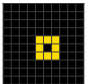

?

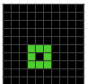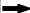

?

Supplement: supplementary_material [file f3e62deb_problem.pdf › CompressARC/results_for_the_blog_post/plots_evaluation/f3e62deb_problem.pdf]

sample

sample average

guess 1

guess 2

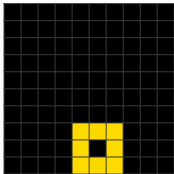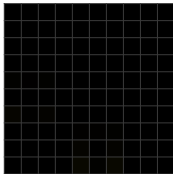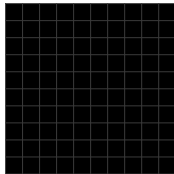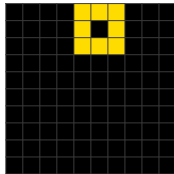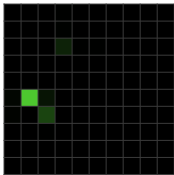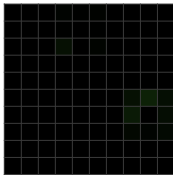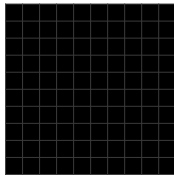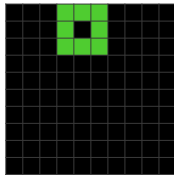

Supplement: supplementary_material [file f3e62deb_solutions.pdf › CompressARC/results_for_the_blog_post/plots_evaluation/f3e62deb_solutions.pdf]

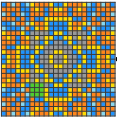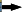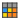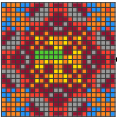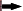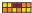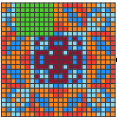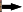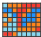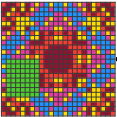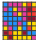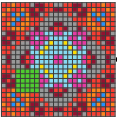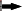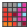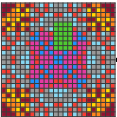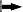

?

Supplement: supplementary_material [file f4081712_problem.pdf › CompressARC/results_for_the_blog_post/plots_evaluation/f4081712_problem.pdf]

sample

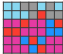

sample average

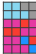

guess 1

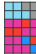

guess 2

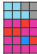

Supplement: supplementary_material [file f4081712_solutions.pdf › CompressARC/results_for_the_blog_post/plots_evaluation/f4081712_solutions.pdf]

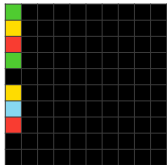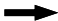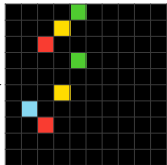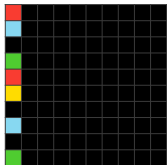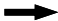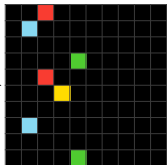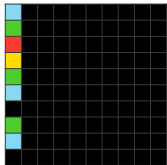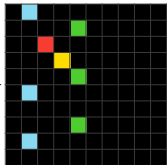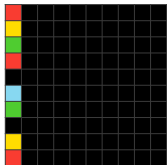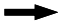

?

Supplement: supplementary_material [file f45f5ca7_problem.pdf › CompressARC/results_for_the_blog_post/plots_evaluation/f45f5ca7_problem.pdf]

sample

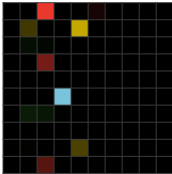

sample average

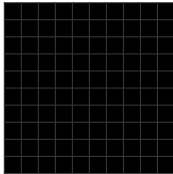

guess 1



guess 2

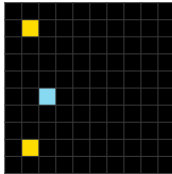

Supplement: supplementary_material [file f45f5ca7_solutions.pdf › CompressARC/results_for_the_blog_post/plots_evaluation/f45f5ca7_solutions.pdf]

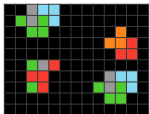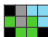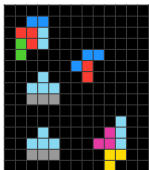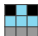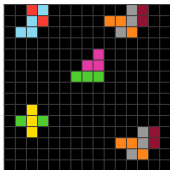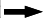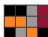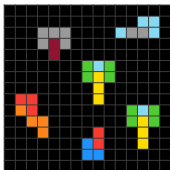

?

Supplement: supplementary_material [file f5aa3634_problem.pdf › CompressARC/results_for_the_blog_post/plots_evaluation/f5aa3634_problem.pdf]

sample

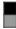

sample average

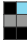

guess 1

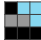

guess 2

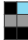

Supplement: supplementary_material [file f5aa3634_solutions.pdf › CompressARC/results_for_the_blog_post/plots_evaluation/f5aa3634_solutions.pdf]

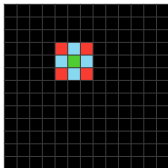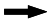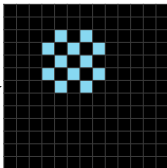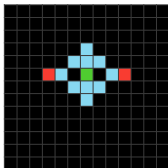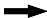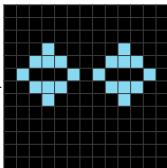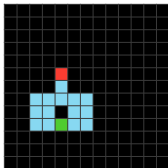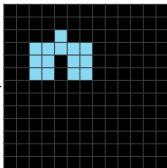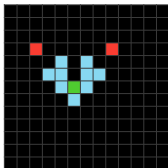

?

Supplement: supplementary_material [file f5c89df1_problem.pdf › CompressARC/results_for_the_blog_post/plots_evaluation/f5c89df1_problem.pdf]

sample

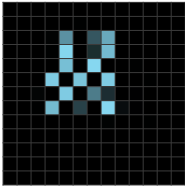

sample average

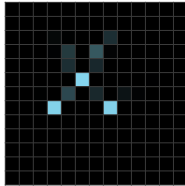

guess 1

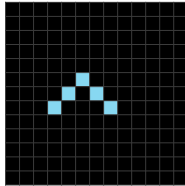

guess 2

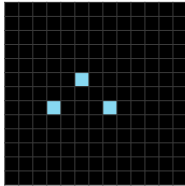

Supplement: supplementary_material [file f5c89df1_solutions.pdf › CompressARC/results_for_the_blog_post/plots_evaluation/f5c89df1_solutions.pdf]

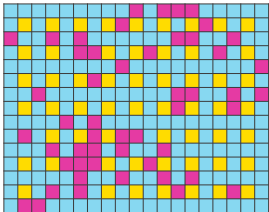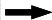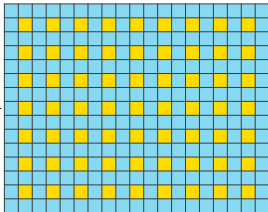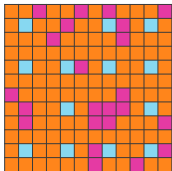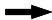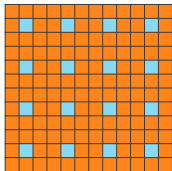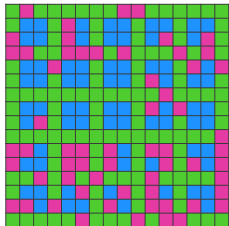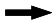

?

Supplement: supplementary_material [file f823c43c_problem.pdf › CompressARC/results_for_the_blog_post/plots_evaluation/f823c43c_problem.pdf]

sample

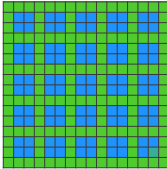

sample average

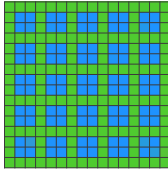

guess 1

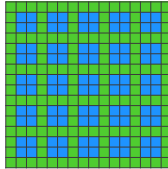

guess 2

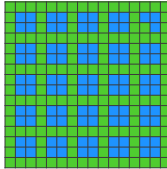

Supplement: supplementary_material [file f823c43c_solutions.pdf › CompressARC/results_for_the_blog_post/plots_evaluation/f823c43c_solutions.pdf]

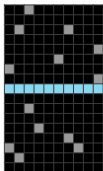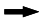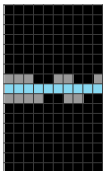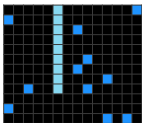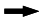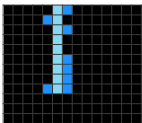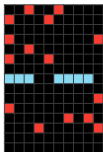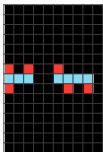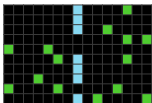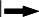

?

Supplement: supplementary_material [file f83cb3f6_problem.pdf › CompressARC/results_for_the_blog_post/plots_evaluation/f83cb3f6_problem.pdf]

sample

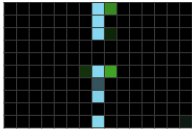

sample average

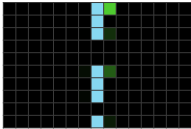

guess 1

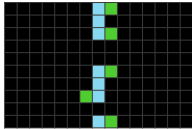

guess 2

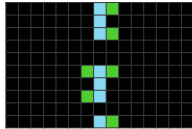

Supplement: supplementary_material [file f83cb3f6_solutions.pdf › CompressARC/results_for_the_blog_post/plots_evaluation/f83cb3f6_solutions.pdf]

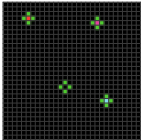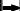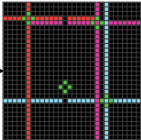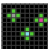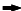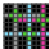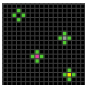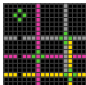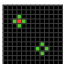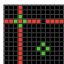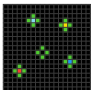

?

Supplement: supplementary_material [file f8be4b64_problem.pdf › CompressARC/results_for_the_blog_post/plots_evaluation/f8be4b64_problem.pdf]

sample

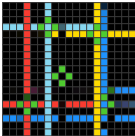

sample average

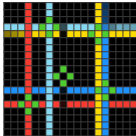

guess 1

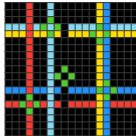

guess 2

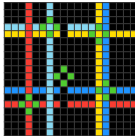

Supplement: supplementary_material [file f8be4b64_solutions.pdf › CompressARC/results_for_the_blog_post/plots_evaluation/f8be4b64_solutions.pdf]

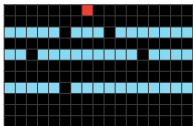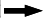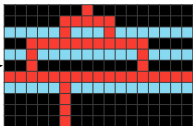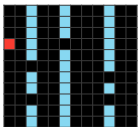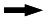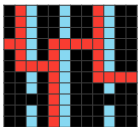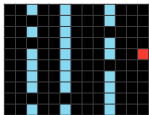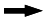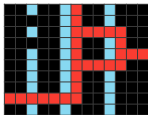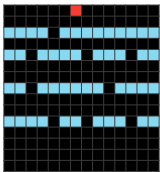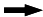

?

Supplement: supplementary_material [file f9a67cb5_problem.pdf › CompressARC/results_for_the_blog_post/plots_evaluation/f9a67cb5_problem.pdf]

sample

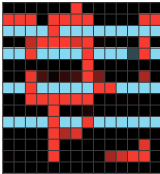

sample average

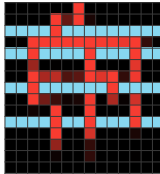

guess 1

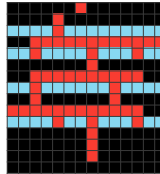

guess 2

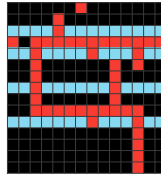

Supplement: supplementary_material [file f9a67cb5_solutions.pdf › CompressARC/results_for_the_blog_post/plots_evaluation/f9a67cb5_solutions.pdf]

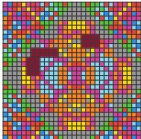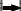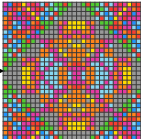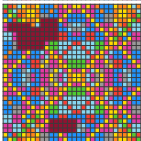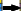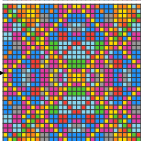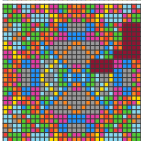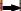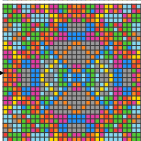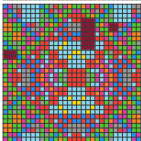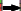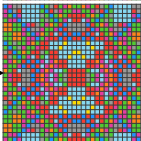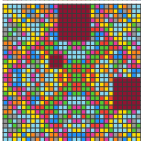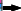

?

Supplement: supplementary_material [file f9d67f8b_problem.pdf › CompressARC/results_for_the_blog_post/plots_evaluation/f9d67f8b_problem.pdf]

sample

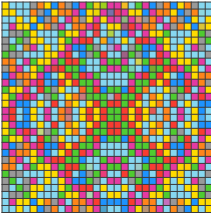

sample average

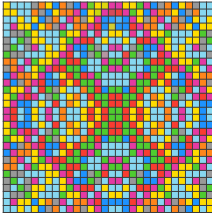

guess 1

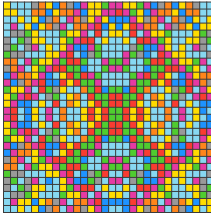

guess 2

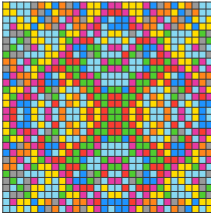

Supplement: supplementary_material [file f9d67f8b_solutions.pdf › CompressARC/results_for_the_blog_post/plots_evaluation/f9d67f8b_solutions.pdf]

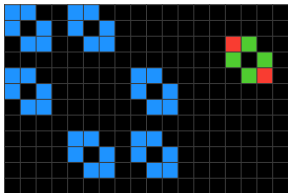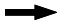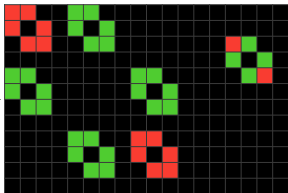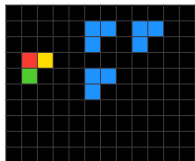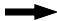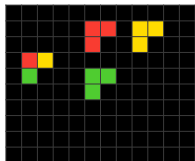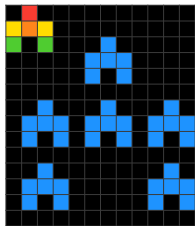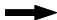

?

Supplement: supplementary_material [file fafd9572_problem.pdf › CompressARC/results_for_the_blog_post/plots_evaluation/fafd9572_problem.pdf]

sample

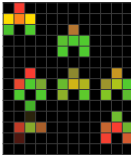

sample average

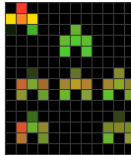

guess 1

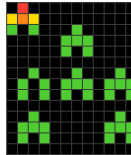

guess 2

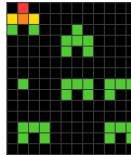

Supplement: supplementary_material [file fafd9572_solutions.pdf › CompressARC/results_for_the_blog_post/plots_evaluation/fafd9572_solutions.pdf]

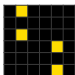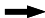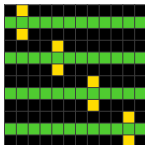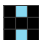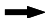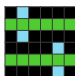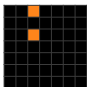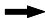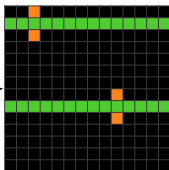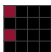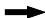

?

Supplement: supplementary_material [file fb791726_problem.pdf › CompressARC/results_for_the_blog_post/plots_evaluation/fb791726_problem.pdf]

sample

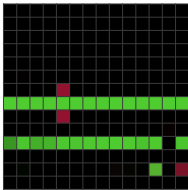

sample average

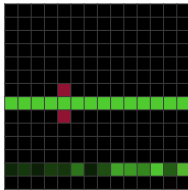

guess 1

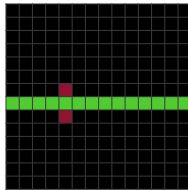

guess 2

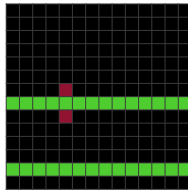

Supplement: supplementary_material [file fb791726_solutions.pdf › CompressARC/results_for_the_blog_post/plots_evaluation/fb791726_solutions.pdf]

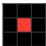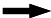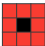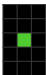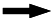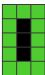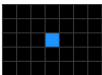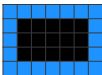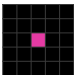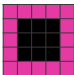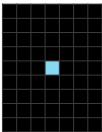

?

Supplement: supplementary_material [file fc754716_problem.pdf › CompressARC/results_for_the_blog_post/plots_evaluation/fc754716_problem.pdf]
