# Supplementary material (part 10 of 17)
Source: ML conference proceedings conference paper supplement (https://openreview.net/forum?id=jLC662Yo5h)

sample

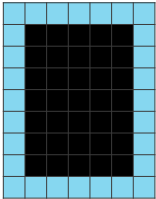

sample average

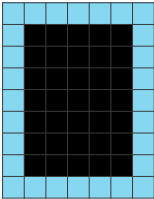

guess 1

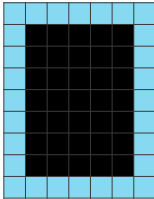

guess 2

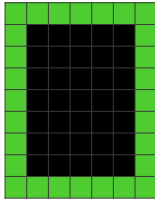

Supplement: supplementary_material [file fc754716_solutions.pdf › CompressARC/results_for_the_blog_post/plots_evaluation/fc754716_solutions.pdf]

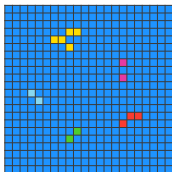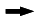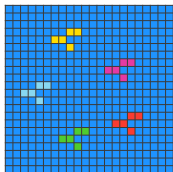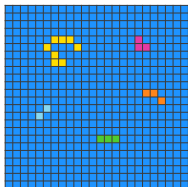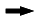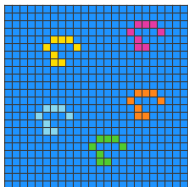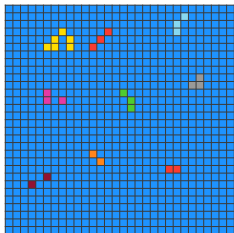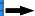

?

Supplement: supplementary_material [file fd096ab6_problem.pdf › CompressARC/results_for_the_blog_post/plots_evaluation/fd096ab6_problem.pdf]

sample

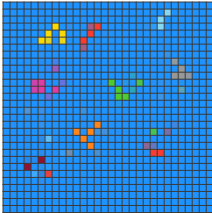

sample average

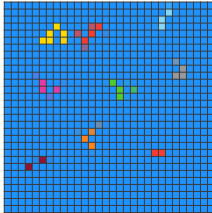

guess 1

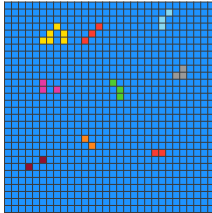

guess 2

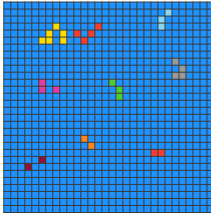

Supplement: supplementary_material [file fd096ab6_solutions.pdf › CompressARC/results_for_the_blog_post/plots_evaluation/fd096ab6_solutions.pdf]

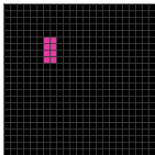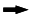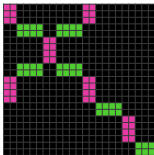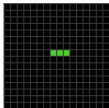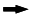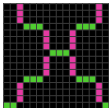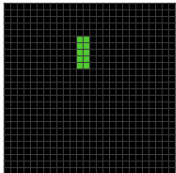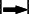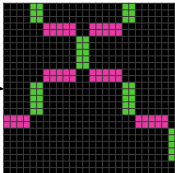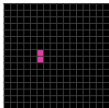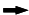

?

Supplement: supplementary_material [file fd4b2b02_problem.pdf › CompressARC/results_for_the_blog_post/plots_evaluation/fd4b2b02_problem.pdf]

sample

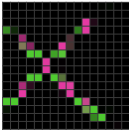

sample average

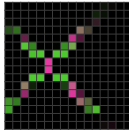

guess 1

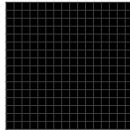

guess 2

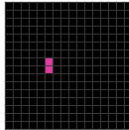

Supplement: supplementary_material [file fd4b2b02_solutions.pdf › CompressARC/results_for_the_blog_post/plots_evaluation/fd4b2b02_solutions.pdf]

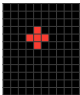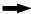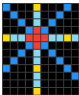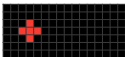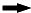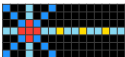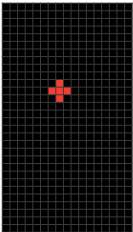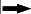

?

Supplement: supplementary_material [file fe9372f3_problem.pdf › CompressARC/results_for_the_blog_post/plots_evaluation/fe9372f3_problem.pdf]

sample

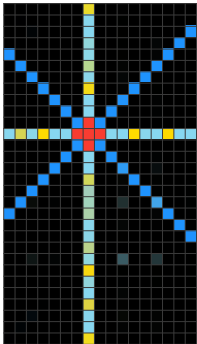

sample average

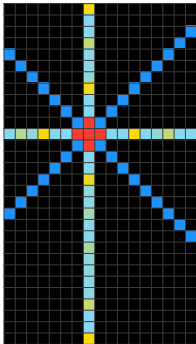

guess 1

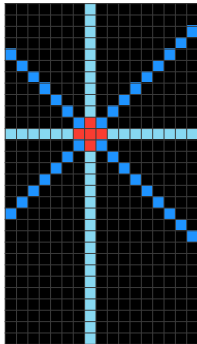

guess 2

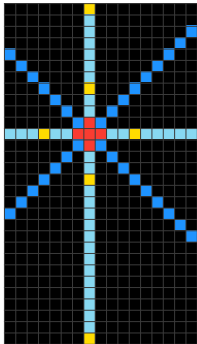

Supplement: supplementary_material [file fe9372f3_solutions.pdf › CompressARC/results_for_the_blog_post/plots_evaluation/fe9372f3_solutions.pdf]

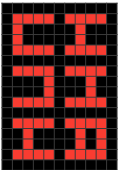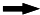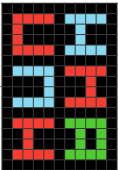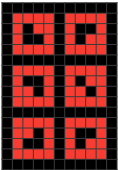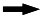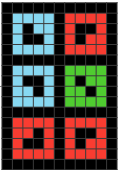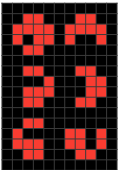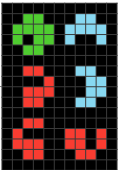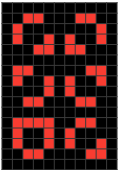

?

Supplement: supplementary_material [file fea12743_problem.pdf › CompressARC/results_for_the_blog_post/plots_evaluation/fea12743_problem.pdf]

sample

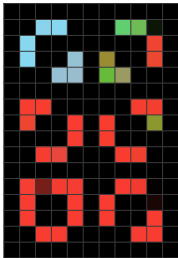

sample average

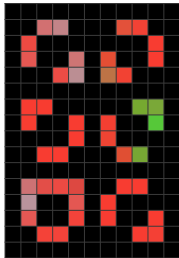

guess 1

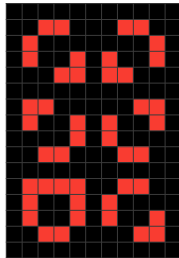

guess 2

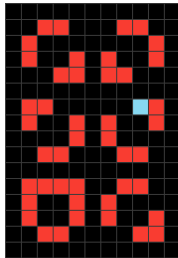

Supplement: supplementary_material [file fea12743_solutions.pdf › CompressARC/results_for_the_blog_post/plots_evaluation/fea12743_solutions.pdf]

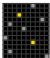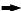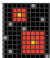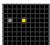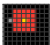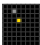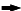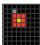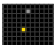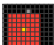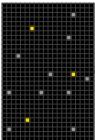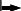

?

Supplement: supplementary_material [file ff72ca3e_problem.pdf › CompressARC/results_for_the_blog_post/plots_evaluation/ff72ca3e_problem.pdf]

sample

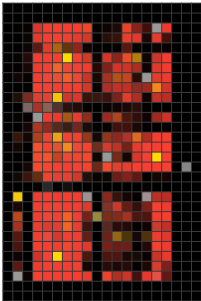

sample average

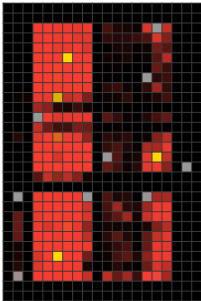

guess 1

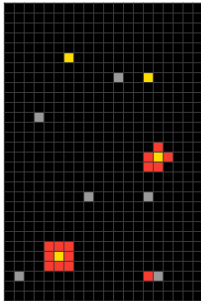

guess 2

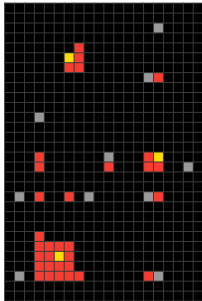

Supplement: supplementary_material [file ff72ca3e_solutions.pdf › CompressARC/results_for_the_blog_post/plots_evaluation/ff72ca3e_solutions.pdf]

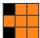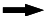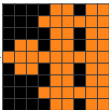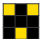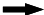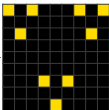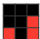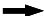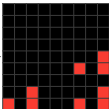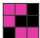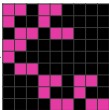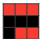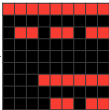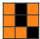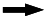

?

Supplement: supplementary_material [file 007bbfb7_problem.pdf › CompressARC/results_for_the_blog_post/plots_training/007bbfb7_problem.pdf]

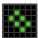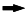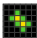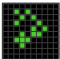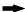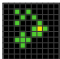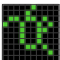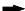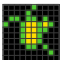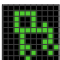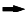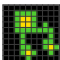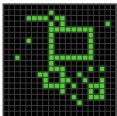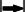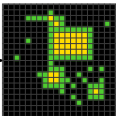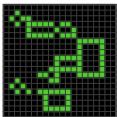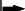

?

Supplement: supplementary_material [file 00d62c1b_problem.pdf › CompressARC/results_for_the_blog_post/plots_training/00d62c1b_problem.pdf]

sample

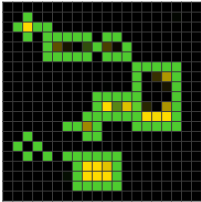

sample average

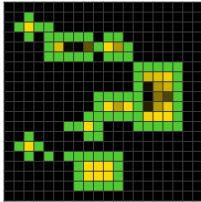

guess 1

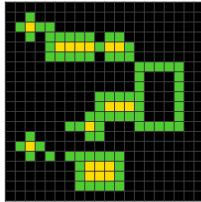

guess 2

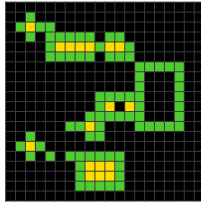

Supplement: supplementary_material [file 00d62c1b_solutions.pdf › CompressARC/results_for_the_blog_post/plots_training/00d62c1b_solutions.pdf]

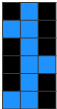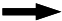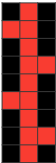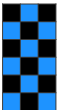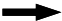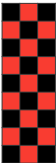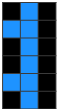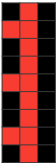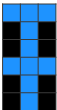

?

Supplement: supplementary_material [file 017c7c7b_problem.pdf › CompressARC/results_for_the_blog_post/plots_training/017c7c7b_problem.pdf]

sample

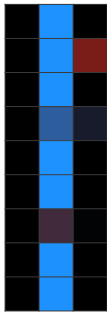

sample average

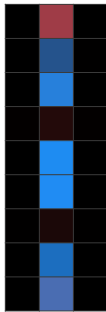

guess 1

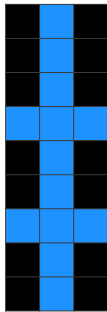

guess 2

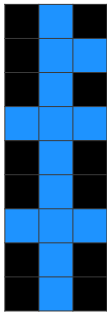

Supplement: supplementary_material [file 017c7c7b_solutions.pdf › CompressARC/results_for_the_blog_post/plots_training/017c7c7b_solutions.pdf]

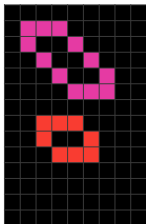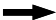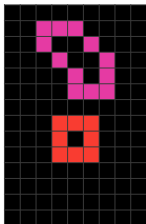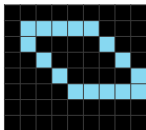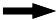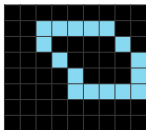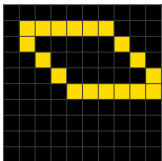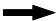

?

Supplement: supplementary_material [file 025d127b_problem.pdf › CompressARC/results_for_the_blog_post/plots_training/025d127b_problem.pdf]

sample

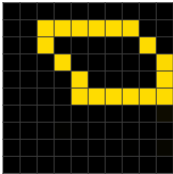

sample average

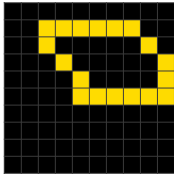

guess 1

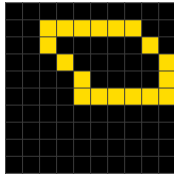

guess 2

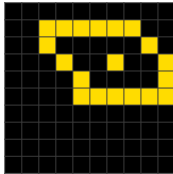

Supplement: supplementary_material [file 025d127b_solutions.pdf › CompressARC/results_for_the_blog_post/plots_training/025d127b_solutions.pdf]

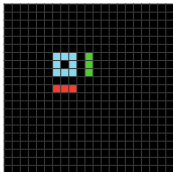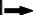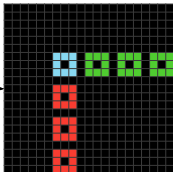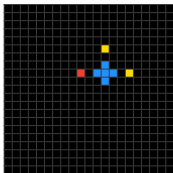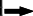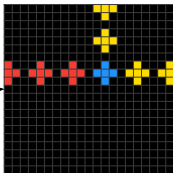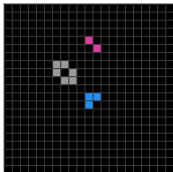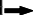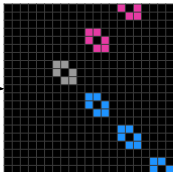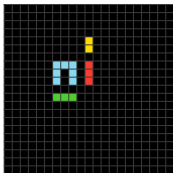

?

Supplement: supplementary_material [file 045e512c_problem.pdf › CompressARC/results_for_the_blog_post/plots_training/045e512c_problem.pdf]

sample

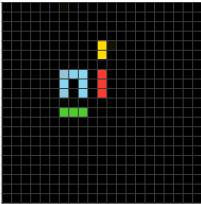

sample average

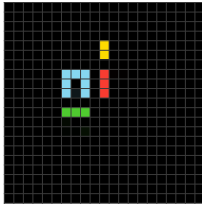

guess 1

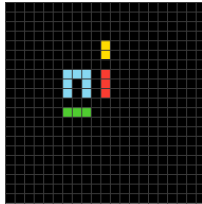

guess 2

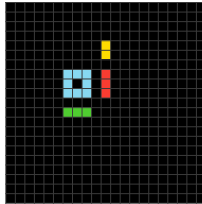

Supplement: supplementary_material [file 045e512c_solutions.pdf › CompressARC/results_for_the_blog_post/plots_training/045e512c_solutions.pdf]

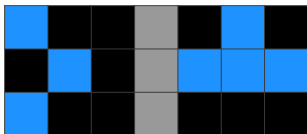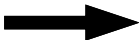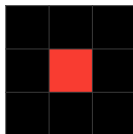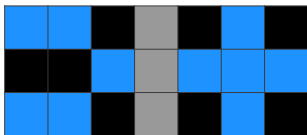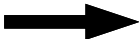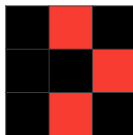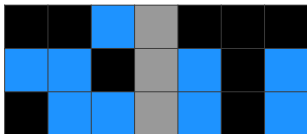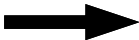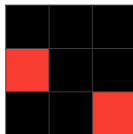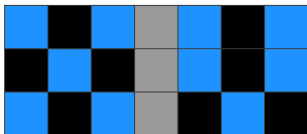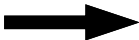

?

Supplement: supplementary_material [file 0520fde7_problem.pdf › CompressARC/results_for_the_blog_post/plots_training/0520fde7_problem.pdf]

sample

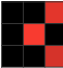

sample average

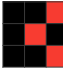

guess 1

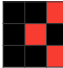

guess 2

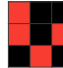

Supplement: supplementary_material [file 0520fde7_solutions.pdf › CompressARC/results_for_the_blog_post/plots_training/0520fde7_solutions.pdf]

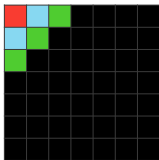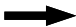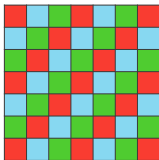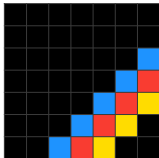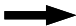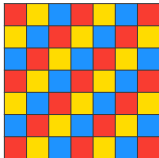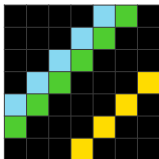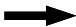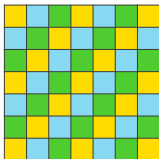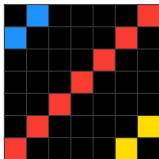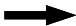

?

Supplement: supplementary_material [file 05269061_problem.pdf › CompressARC/results_for_the_blog_post/plots_training/05269061_problem.pdf]

sample

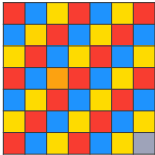

sample average

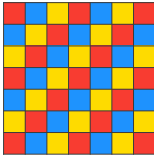

guess 1

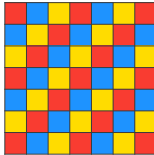

guess 2

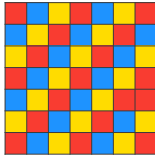

Supplement: supplementary_material [file 05269061_solutions.pdf › CompressARC/results_for_the_blog_post/plots_training/05269061_solutions.pdf]

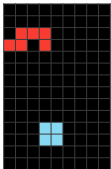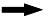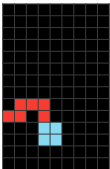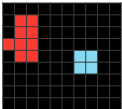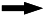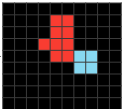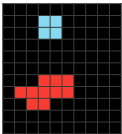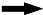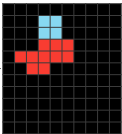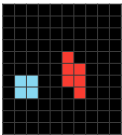

?

Supplement: supplementary_material [file 05f2a901_problem.pdf › CompressARC/results_for_the_blog_post/plots_training/05f2a901_problem.pdf]

sample

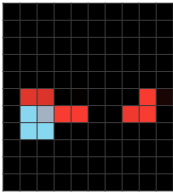

sample average

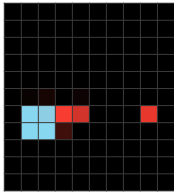

guess 1

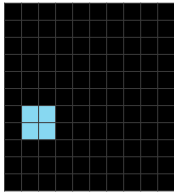

guess 2

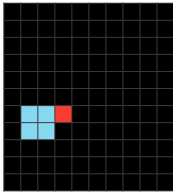

Supplement: supplementary_material [file 05f2a901_solutions.pdf › CompressARC/results_for_the_blog_post/plots_training/05f2a901_solutions.pdf]

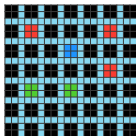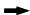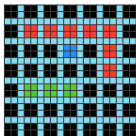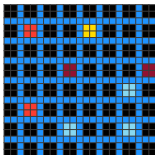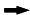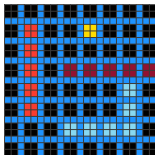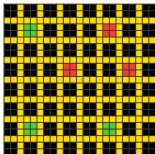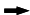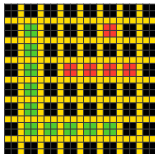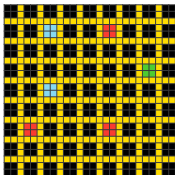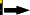

?

Supplement: supplementary_material [file 06df4c85_problem.pdf › CompressARC/results_for_the_blog_post/plots_training/06df4c85_problem.pdf]

sample

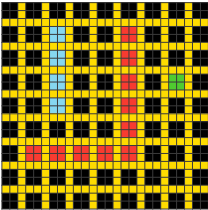

sample average

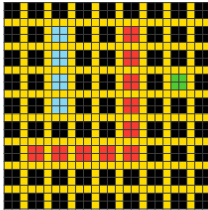

guess 1

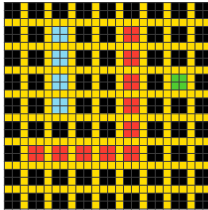

guess 2

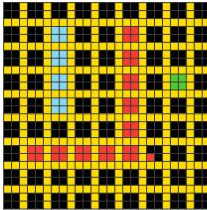

Supplement: supplementary_material [file 06df4c85_solutions.pdf › CompressARC/results_for_the_blog_post/plots_training/06df4c85_solutions.pdf]

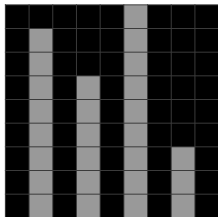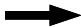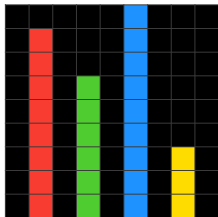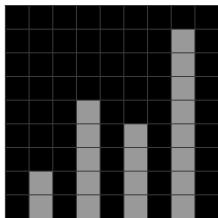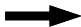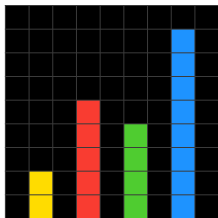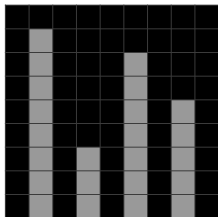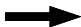

?

Supplement: supplementary_material [file 08ed6ac7_problem.pdf › CompressARC/results_for_the_blog_post/plots_training/08ed6ac7_problem.pdf]

sample

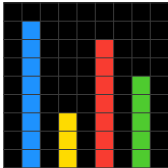

sample average

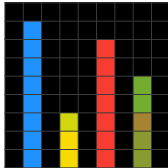

guess 1

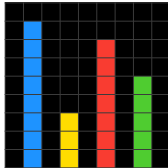

guess 2

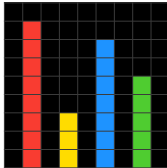

Supplement: supplementary_material [file 08ed6ac7_solutions.pdf › CompressARC/results_for_the_blog_post/plots_training/08ed6ac7_solutions.pdf]

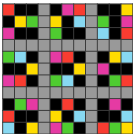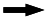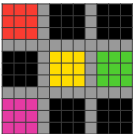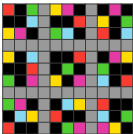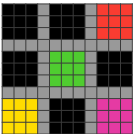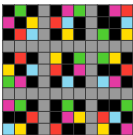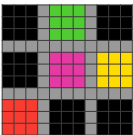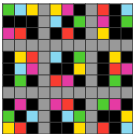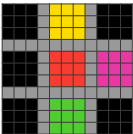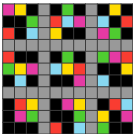

?

Supplement: supplementary_material [file 09629e4f_problem.pdf › CompressARC/results_for_the_blog_post/plots_training/09629e4f_problem.pdf]

sample

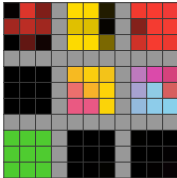

sample average

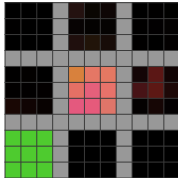

guess 1

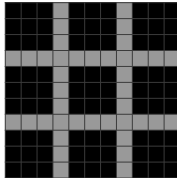

guess 2

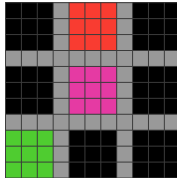

Supplement: supplementary_material [file 09629e4f_solutions.pdf › CompressARC/results_for_the_blog_post/plots_training/09629e4f_solutions.pdf]

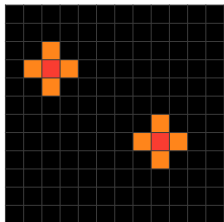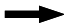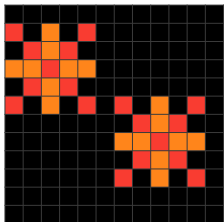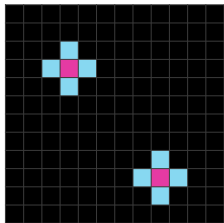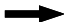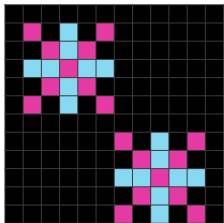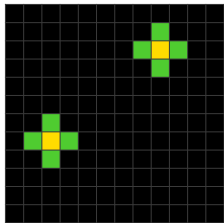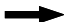

?

Supplement: supplementary_material [file 0962bcdd_problem.pdf › CompressARC/results_for_the_blog_post/plots_training/0962bcdd_problem.pdf]

sample

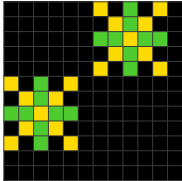

sample average

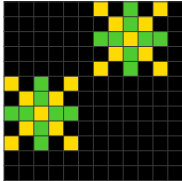

guess 1

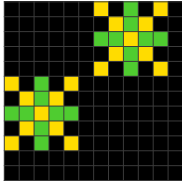

guess 2

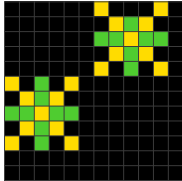

Supplement: supplementary_material [file 0962bcdd_solutions.pdf › CompressARC/results_for_the_blog_post/plots_training/0962bcdd_solutions.pdf]

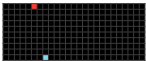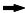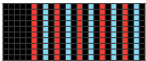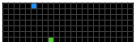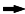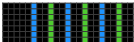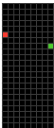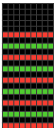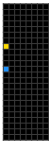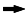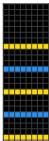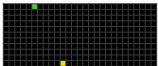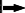

?

Supplement: supplementary_material [file 0a938d79_problem.pdf › CompressARC/results_for_the_blog_post/plots_training/0a938d79_problem.pdf]

sample

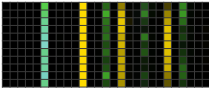

sample average

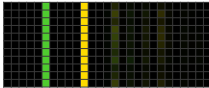

guess 1

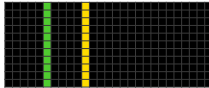

guess 2

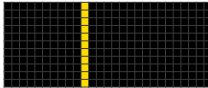

Supplement: supplementary_material [file 0a938d79_solutions.pdf › CompressARC/results_for_the_blog_post/plots_training/0a938d79_solutions.pdf]

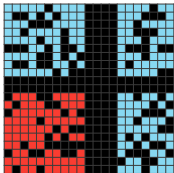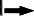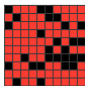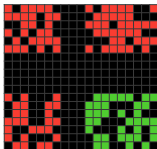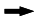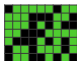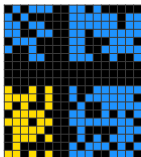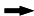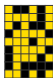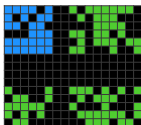

?

Supplement: supplementary_material [file 0b148d64_problem.pdf › CompressARC/results_for_the_blog_post/plots_training/0b148d64_problem.pdf]

sample

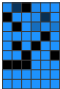

sample average

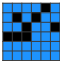

guess 1

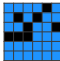

guess 2

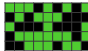

Supplement: supplementary_material [file 0b148d64_solutions.pdf › CompressARC/results_for_the_blog_post/plots_training/0b148d64_solutions.pdf]

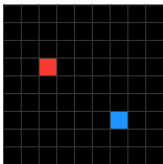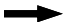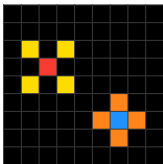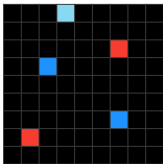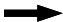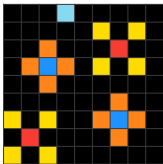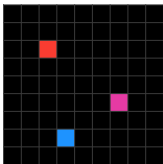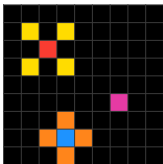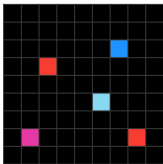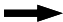

?

Supplement: supplementary_material [file 0ca9ddb6_problem.pdf › CompressARC/results_for_the_blog_post/plots_training/0ca9ddb6_problem.pdf]

sample

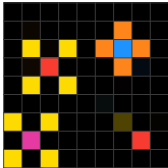

sample average

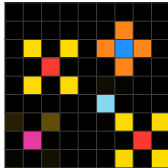

guess 1

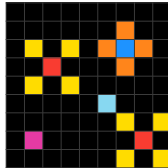

guess 2

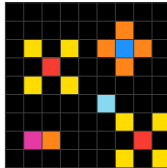

Supplement: supplementary_material [file 0ca9ddb6_solutions.pdf › CompressARC/results_for_the_blog_post/plots_training/0ca9ddb6_solutions.pdf]

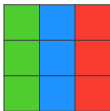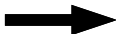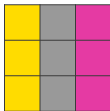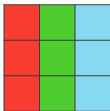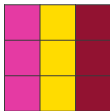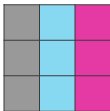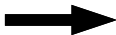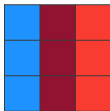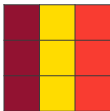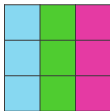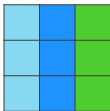

?

Supplement: supplementary_material [file 0d3d703e_problem.pdf › CompressARC/results_for_the_blog_post/plots_training/0d3d703e_problem.pdf]

sample

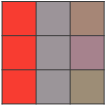

sample average

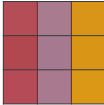

guess 1

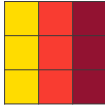

guess 2

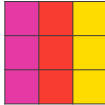

Supplement: supplementary_material [file 0d3d703e_solutions.pdf › CompressARC/results_for_the_blog_post/plots_training/0d3d703e_solutions.pdf]

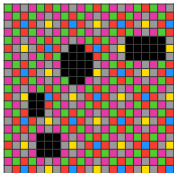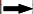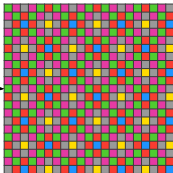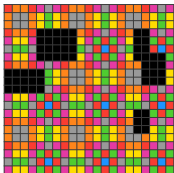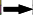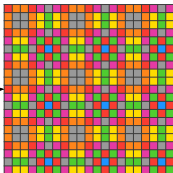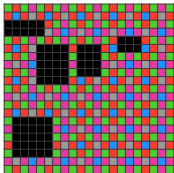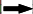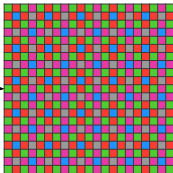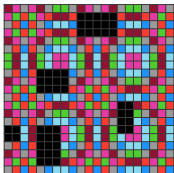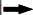

?

Supplement: supplementary_material [file 0dfd9992_problem.pdf › CompressARC/results_for_the_blog_post/plots_training/0dfd9992_problem.pdf]

sample

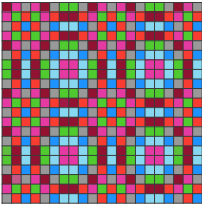

sample average

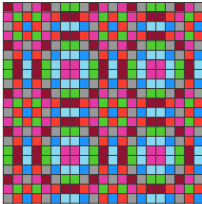

guess 1

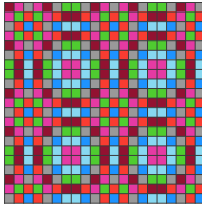

guess 2

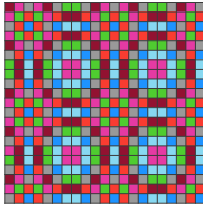

Supplement: supplementary_material [file 0dfd9992_solutions.pdf › CompressARC/results_for_the_blog_post/plots_training/0dfd9992_solutions.pdf]

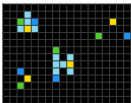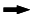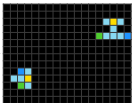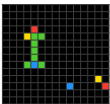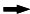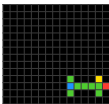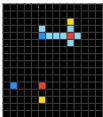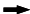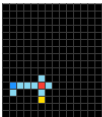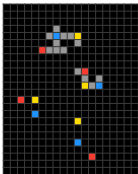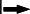

?

Supplement: supplementary_material [file 0e206a2e_problem.pdf › CompressARC/results_for_the_blog_post/plots_training/0e206a2e_problem.pdf]

sample

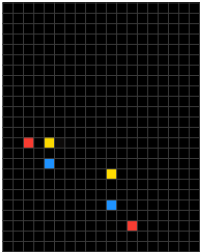

sample average

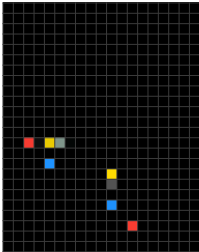

guess 1

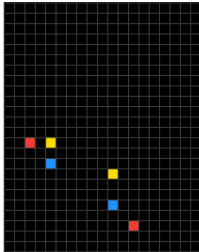

guess 2

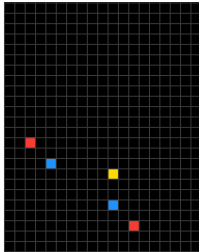

Supplement: supplementary_material [file 0e206a2e_solutions.pdf › CompressARC/results_for_the_blog_post/plots_training/0e206a2e_solutions.pdf]

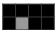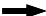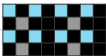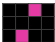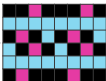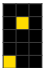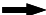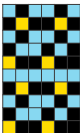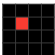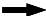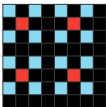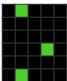

?

Supplement: supplementary_material [file 10fcaaa3_problem.pdf › CompressARC/results_for_the_blog_post/plots_training/10fcaaa3_problem.pdf]

sample

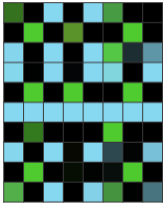

sample average

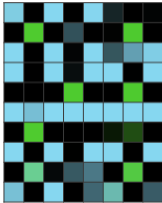

guess 1

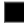

guess 2

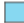

Supplement: supplementary_material [file 10fcaaa3_solutions.pdf › CompressARC/results_for_the_blog_post/plots_training/10fcaaa3_solutions.pdf]

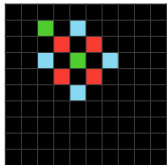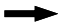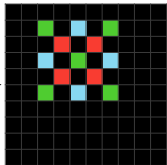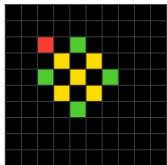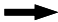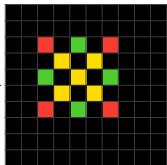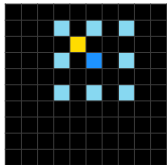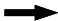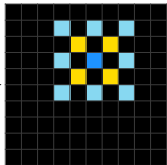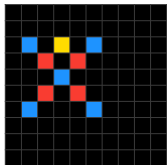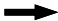

?

Supplement: supplementary_material [file 11852cab_problem.pdf › CompressARC/results_for_the_blog_post/plots_training/11852cab_problem.pdf]

sample

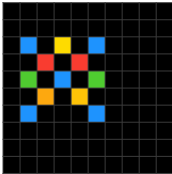

sample average

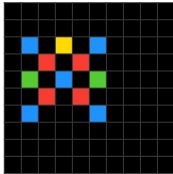

guess 1

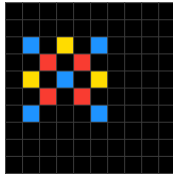

guess 2

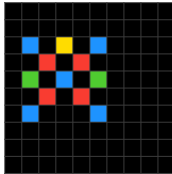

Supplement: supplementary_material [file 11852cab_solutions.pdf › CompressARC/results_for_the_blog_post/plots_training/11852cab_solutions.pdf]

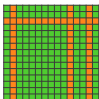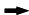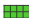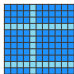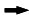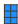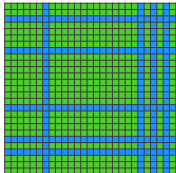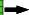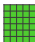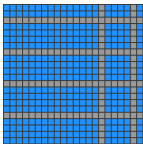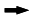

?

Supplement: supplementary_material [file 1190e5a7_problem.pdf › CompressARC/results_for_the_blog_post/plots_training/1190e5a7_problem.pdf]

sample

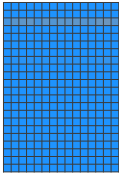

sample average

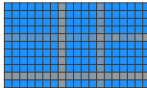

guess 1

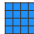

guess 2

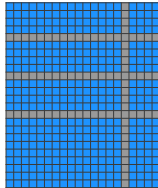

Supplement: supplementary_material [file 1190e5a7_solutions.pdf › CompressARC/results_for_the_blog_post/plots_training/1190e5a7_solutions.pdf]

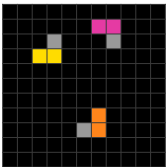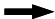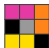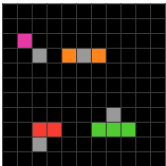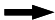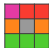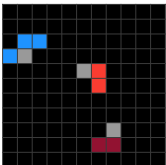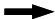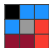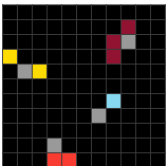

?

Supplement: supplementary_material [file 137eaa0f_problem.pdf › CompressARC/results_for_the_blog_post/plots_training/137eaa0f_problem.pdf]

sample

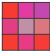

sample average

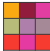

guess 1

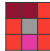

guess 2

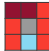

Supplement: supplementary_material [file 137eaa0f_solutions.pdf › CompressARC/results_for_the_blog_post/plots_training/137eaa0f_solutions.pdf]

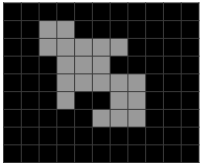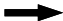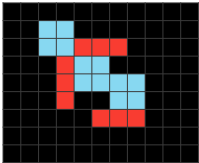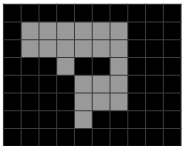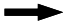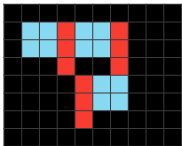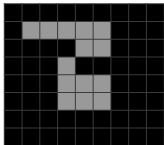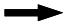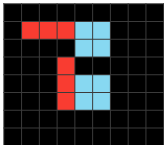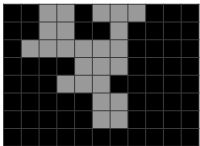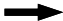

?

Supplement: supplementary_material [file 150deff5_problem.pdf › CompressARC/results_for_the_blog_post/plots_training/150deff5_problem.pdf]

sample

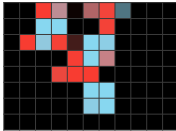

sample average

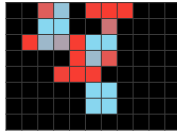

guess 1

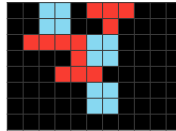

guess 2

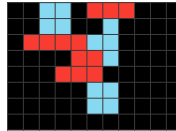

Supplement: supplementary_material [file 150deff5_solutions.pdf › CompressARC/results_for_the_blog_post/plots_training/150deff5_solutions.pdf]

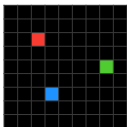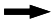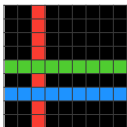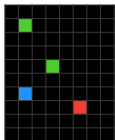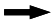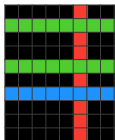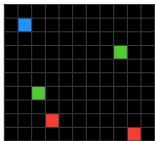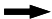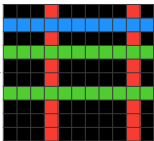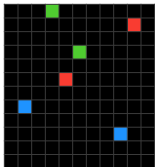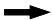

?

Supplement: supplementary_material [file 178fcbfb_problem.pdf › CompressARC/results_for_the_blog_post/plots_training/178fcbfb_problem.pdf]

sample

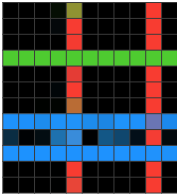

sample average

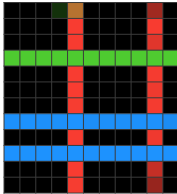

guess 1

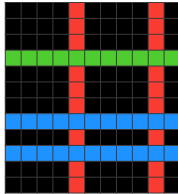

guess 2

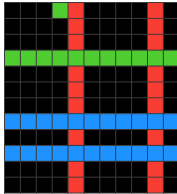

Supplement: supplementary_material [file 178fcbfb_solutions.pdf › CompressARC/results_for_the_blog_post/plots_training/178fcbfb_solutions.pdf]

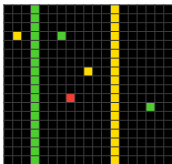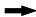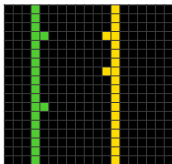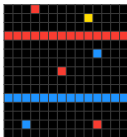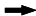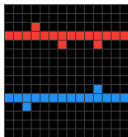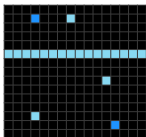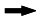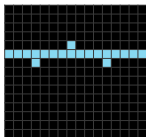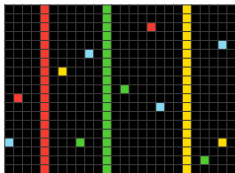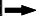

?

Supplement: supplementary_material [file 1a07d186_problem.pdf › CompressARC/results_for_the_blog_post/plots_training/1a07d186_problem.pdf]

sample

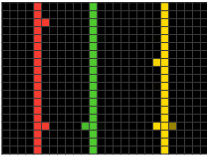

sample average

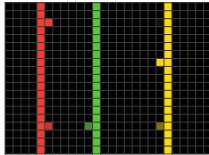

guess 1

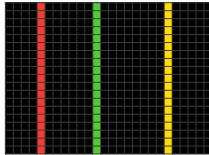

guess 2

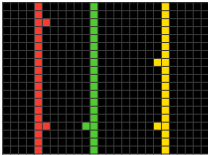

Supplement: supplementary_material [file 1a07d186_solutions.pdf › CompressARC/results_for_the_blog_post/plots_training/1a07d186_solutions.pdf]

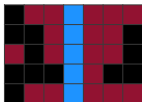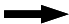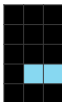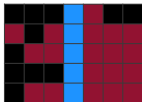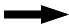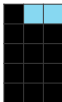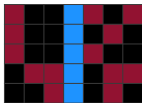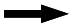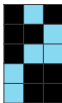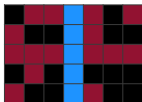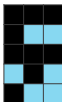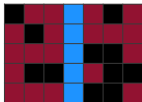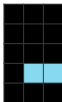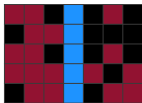

?

Supplement: supplementary_material [file 1b2d62fb_problem.pdf › CompressARC/results_for_the_blog_post/plots_training/1b2d62fb_problem.pdf]

sample

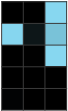

sample average

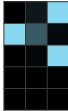

guess 1

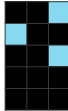

guess 2

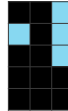

Supplement: supplementary_material [file 1b2d62fb_solutions.pdf › CompressARC/results_for_the_blog_post/plots_training/1b2d62fb_solutions.pdf]

sample

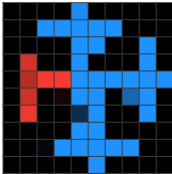

sample average

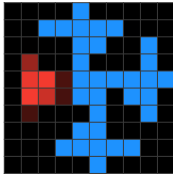

guess 1

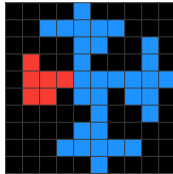

guess 2

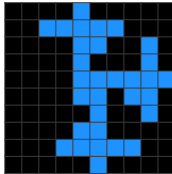

Supplement: supplementary_material [file 1b60fb0c_solutions.pdf › CompressARC/results_for_the_blog_post/plots_training/1b60fb0c_solutions.pdf]

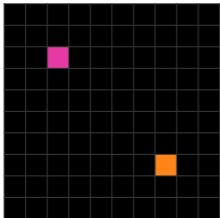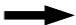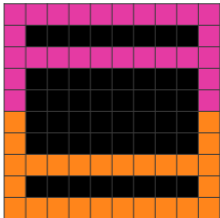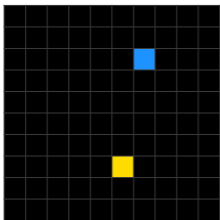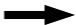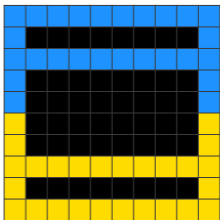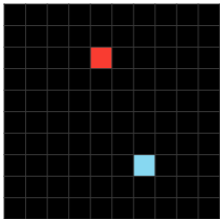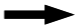

?

Supplement: supplementary_material [file 1bfc4729_problem.pdf › CompressARC/results_for_the_blog_post/plots_training/1bfc4729_problem.pdf]

sample

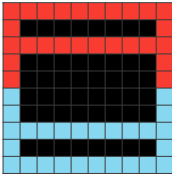

sample average

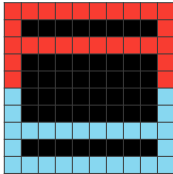

guess 1

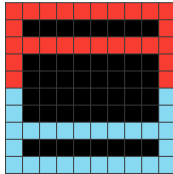

guess 2

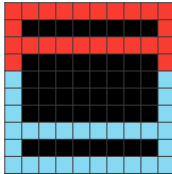

Supplement: supplementary_material [file 1bfc4729_solutions.pdf › CompressARC/results_for_the_blog_post/plots_training/1bfc4729_solutions.pdf]

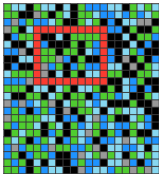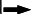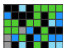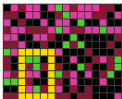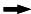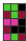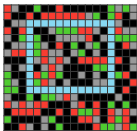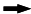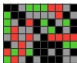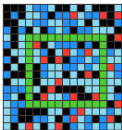

?

Supplement: supplementary_material [file 1c786137_problem.pdf › CompressARC/results_for_the_blog_post/plots_training/1c786137_problem.pdf]

sample

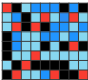

sample average

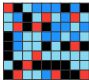

guess 1

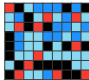

guess 2

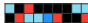

Supplement: supplementary_material [file 1c786137_solutions.pdf › CompressARC/results_for_the_blog_post/plots_training/1c786137_solutions.pdf]

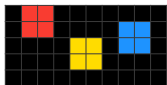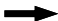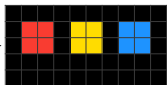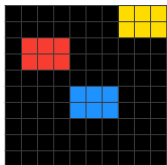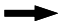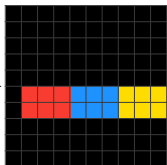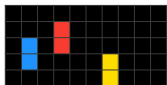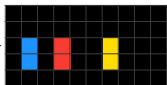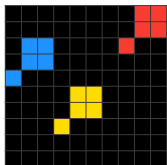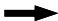

?

Supplement: supplementary_material [file 1caeab9d_problem.pdf › CompressARC/results_for_the_blog_post/plots_training/1caeab9d_problem.pdf]

sample

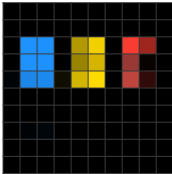

sample average

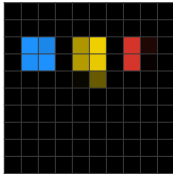

guess 1

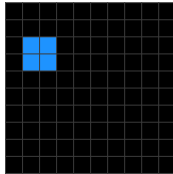

guess 2

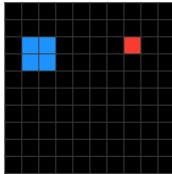

Supplement: supplementary_material [file 1caeab9d_solutions.pdf › CompressARC/results_for_the_blog_post/plots_training/1caeab9d_solutions.pdf]

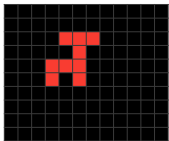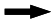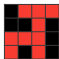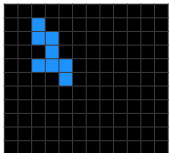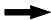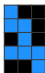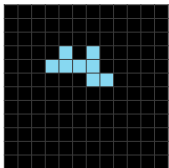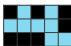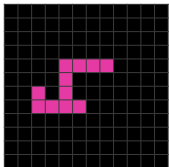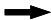

?

Supplement: supplementary_material [file 1cf80156_problem.pdf › CompressARC/results_for_the_blog_post/plots_training/1cf80156_problem.pdf]

sample

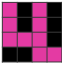

sample average

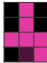

guess 1

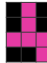

guess 2

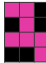

Supplement: supplementary_material [file 1cf80156_solutions.pdf › CompressARC/results_for_the_blog_post/plots_training/1cf80156_solutions.pdf]

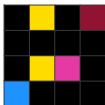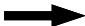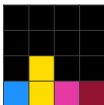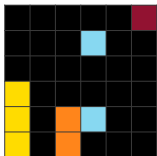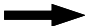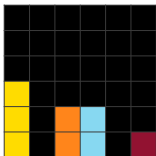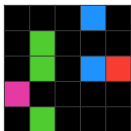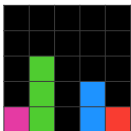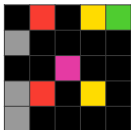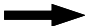

?

Supplement: supplementary_material [file 1e0a9b12_problem.pdf › CompressARC/results_for_the_blog_post/plots_training/1e0a9b12_problem.pdf]

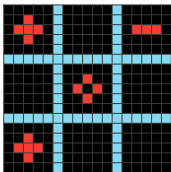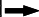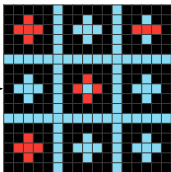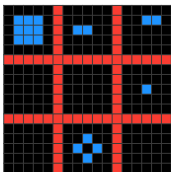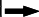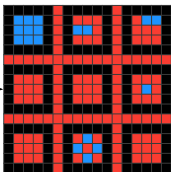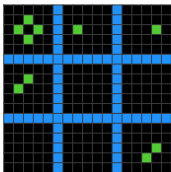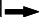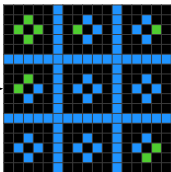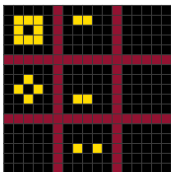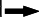

?

Supplement: supplementary_material [file 1e32b0e9_problem.pdf › CompressARC/results_for_the_blog_post/plots_training/1e32b0e9_problem.pdf]

sample

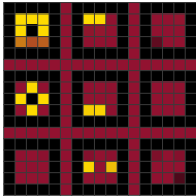

sample average

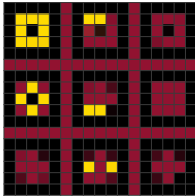

guess 1

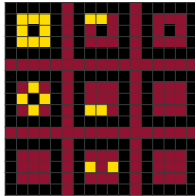

guess 2

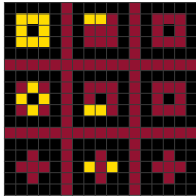

Supplement: supplementary_material [file 1e32b0e9_solutions.pdf › CompressARC/results_for_the_blog_post/plots_training/1e32b0e9_solutions.pdf]

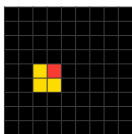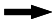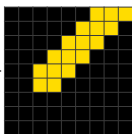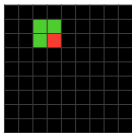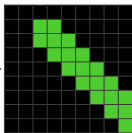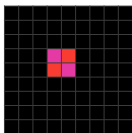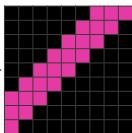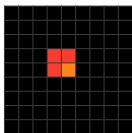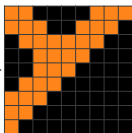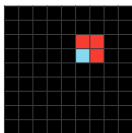

?

Supplement: supplementary_material [file 1f0c79e5_problem.pdf › CompressARC/results_for_the_blog_post/plots_training/1f0c79e5_problem.pdf]

sample

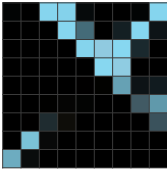

sample average

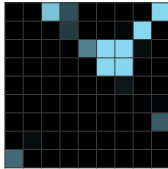

guess 1

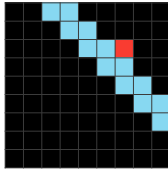

guess 2

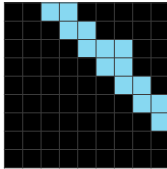

Supplement: supplementary_material [file 1f0c79e5_solutions.pdf › CompressARC/results_for_the_blog_post/plots_training/1f0c79e5_solutions.pdf]

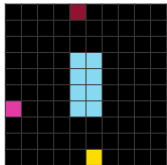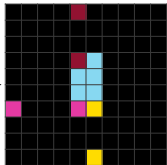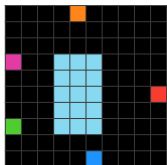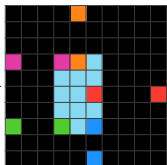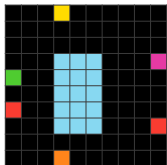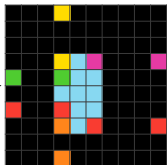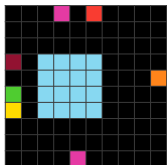

?

Supplement: supplementary_material [file 1f642eb9_problem.pdf › CompressARC/results_for_the_blog_post/plots_training/1f642eb9_problem.pdf]

sample

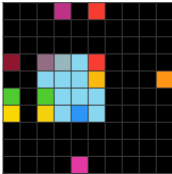

sample average

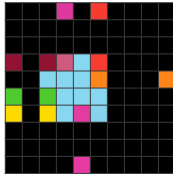

guess 1

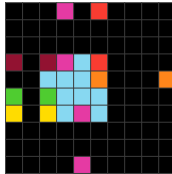

guess 2

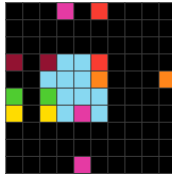

Supplement: supplementary_material [file 1f642eb9_solutions.pdf › CompressARC/results_for_the_blog_post/plots_training/1f642eb9_solutions.pdf]

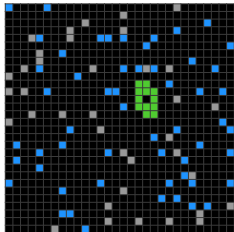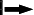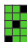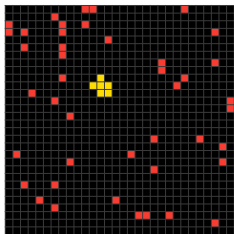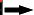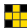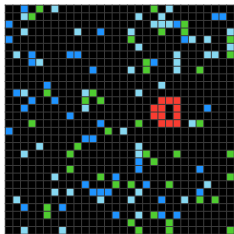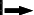

?

Supplement: supplementary_material [file 1f85a75f_problem.pdf › CompressARC/results_for_the_blog_post/plots_training/1f85a75f_problem.pdf]

sample

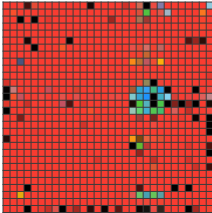

sample average

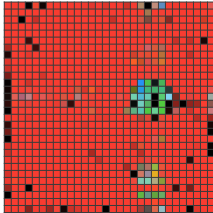

guess 1

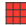

guess 2

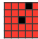

Supplement: supplementary_material [file 1f85a75f_solutions.pdf › CompressARC/results_for_the_blog_post/plots_training/1f85a75f_solutions.pdf]

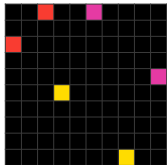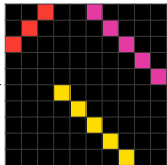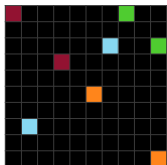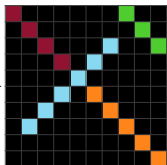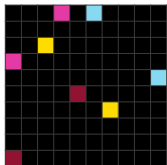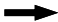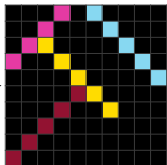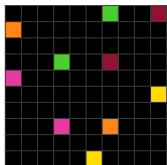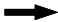

?

Supplement: supplementary_material [file 1f876c06_problem.pdf › CompressARC/results_for_the_blog_post/plots_training/1f876c06_problem.pdf]

sample

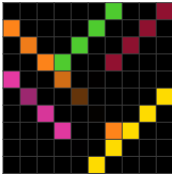

sample average

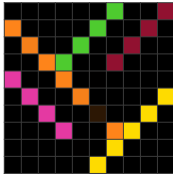

guess 1

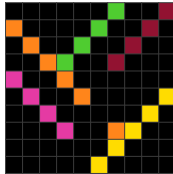

guess 2

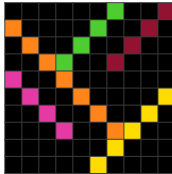

Supplement: supplementary_material [file 1f876c06_solutions.pdf › CompressARC/results_for_the_blog_post/plots_training/1f876c06_solutions.pdf]

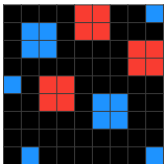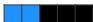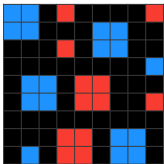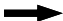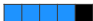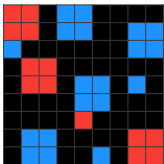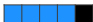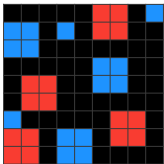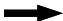

?

Supplement: supplementary_material [file 1fad071e_problem.pdf › CompressARC/results_for_the_blog_post/plots_training/1fad071e_problem.pdf]

sample

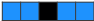

sample average

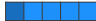

guess 1

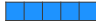

guess 2

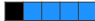

Supplement: supplementary_material [file 1fad071e_solutions.pdf › CompressARC/results_for_the_blog_post/plots_training/1fad071e_solutions.pdf]

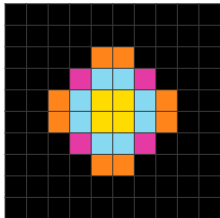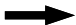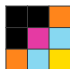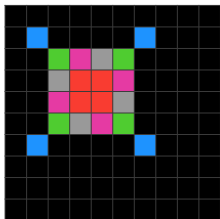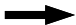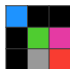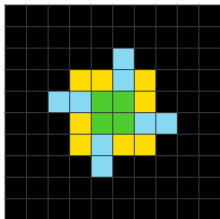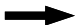

?

Supplement: supplementary_material [file 2013d3e2_problem.pdf › CompressARC/results_for_the_blog_post/plots_training/2013d3e2_problem.pdf]

sample

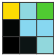

sample average

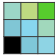

guess 1

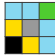

guess 2

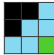

Supplement: supplementary_material [file 2013d3e2_solutions.pdf › CompressARC/results_for_the_blog_post/plots_training/2013d3e2_solutions.pdf]

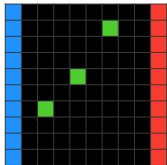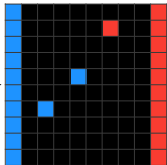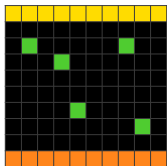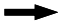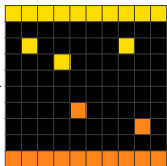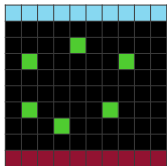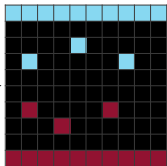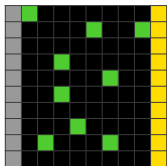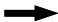

?

Supplement: supplementary_material [file 2204b7a8_problem.pdf › CompressARC/results_for_the_blog_post/plots_training/2204b7a8_problem.pdf]

sample

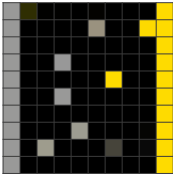

sample average

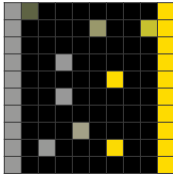

guess 1

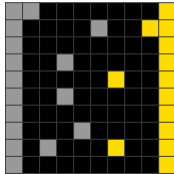

guess 2

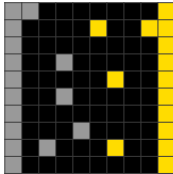

Supplement: supplementary_material [file 2204b7a8_solutions.pdf › CompressARC/results_for_the_blog_post/plots_training/2204b7a8_solutions.pdf]

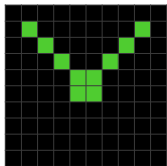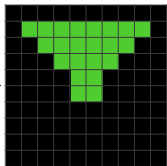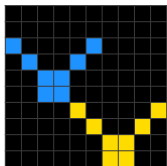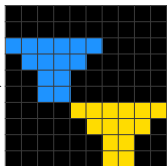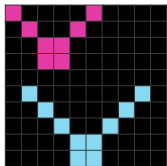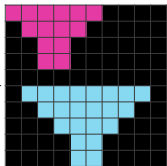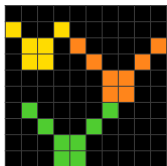

?

Supplement: supplementary_material [file 22168020_problem.pdf › CompressARC/results_for_the_blog_post/plots_training/22168020_problem.pdf]

sample

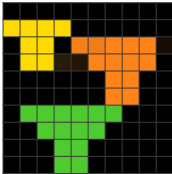

sample average

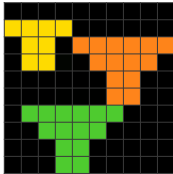

guess 1

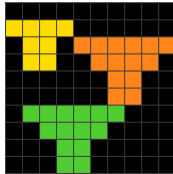

guess 2

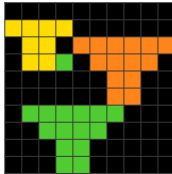

Supplement: supplementary_material [file 22168020_solutions.pdf › CompressARC/results_for_the_blog_post/plots_training/22168020_solutions.pdf]

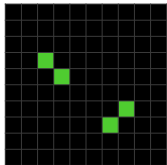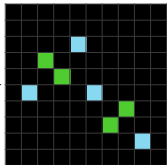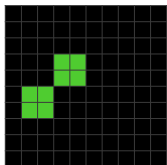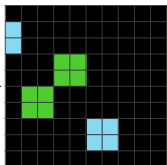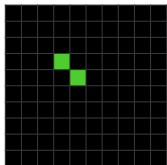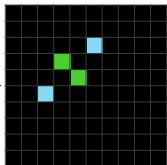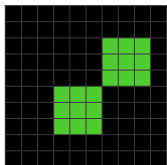

?

Supplement: supplementary_material [file 22233c11_problem.pdf › CompressARC/results_for_the_blog_post/plots_training/22233c11_problem.pdf]

sample

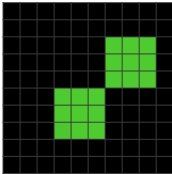

sample average

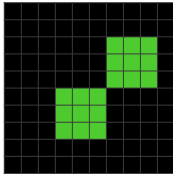

guess 1

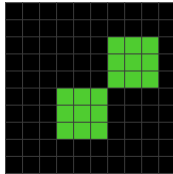

guess 2

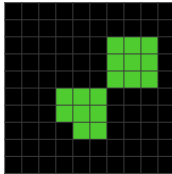

Supplement: supplementary_material [file 22233c11_solutions.pdf › CompressARC/results_for_the_blog_post/plots_training/22233c11_solutions.pdf]

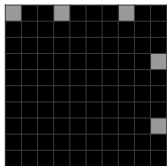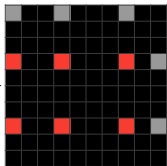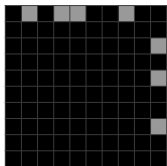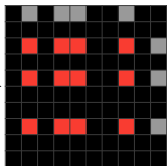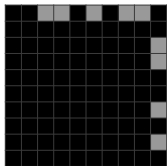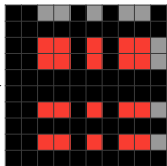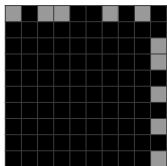

?

Supplement: supplementary_material [file 2281f1f4_problem.pdf › CompressARC/results_for_the_blog_post/plots_training/2281f1f4_problem.pdf]

sample

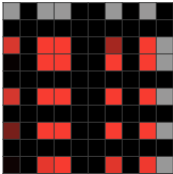

sample average

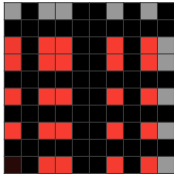

guess 1

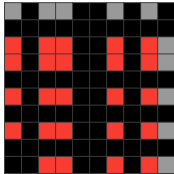

guess 2

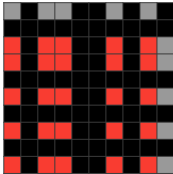

Supplement: supplementary_material [file 2281f1f4_solutions.pdf › CompressARC/results_for_the_blog_post/plots_training/2281f1f4_solutions.pdf]

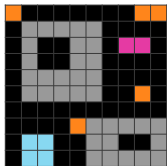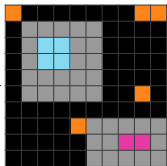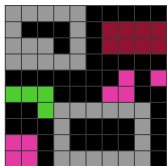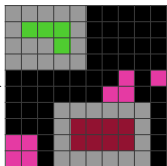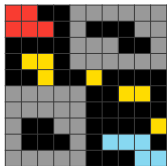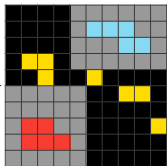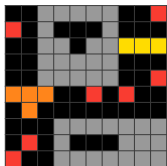

?

Supplement: supplementary_material [file 228f6490_problem.pdf › CompressARC/results_for_the_blog_post/plots_training/228f6490_problem.pdf]

sample

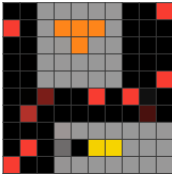

sample average

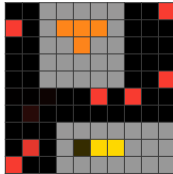

guess 1

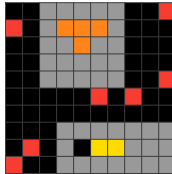

guess 2

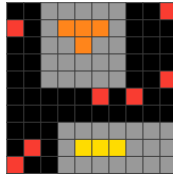

Supplement: supplementary_material [file 228f6490_solutions.pdf › CompressARC/results_for_the_blog_post/plots_training/228f6490_solutions.pdf]

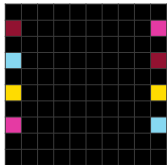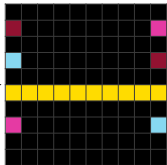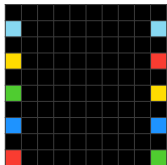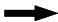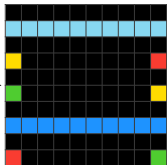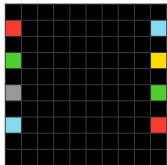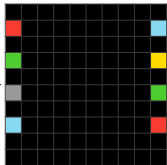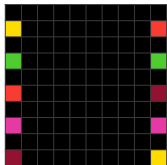

?

Supplement: supplementary_material [file 22eb0ac0_problem.pdf › CompressARC/results_for_the_blog_post/plots_training/22eb0ac0_problem.pdf]

sample

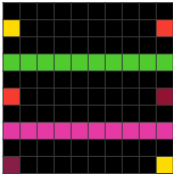

sample average

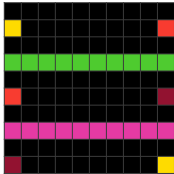

guess 1

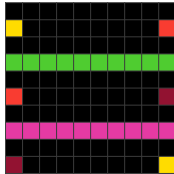

guess 2

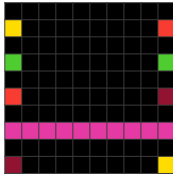

Supplement: supplementary_material [file 22eb0ac0_solutions.pdf › CompressARC/results_for_the_blog_post/plots_training/22eb0ac0_solutions.pdf]

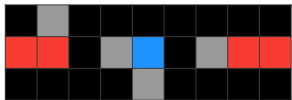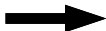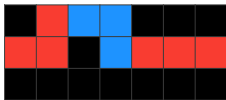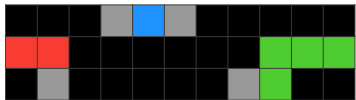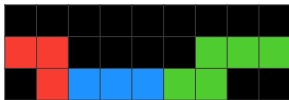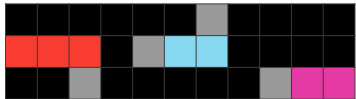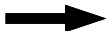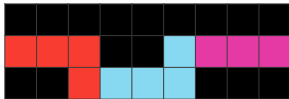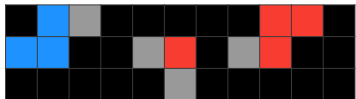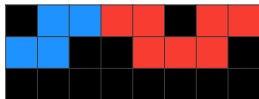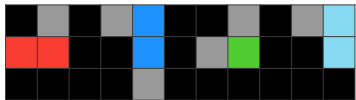

?

Supplement: supplementary_material [file 234bbc79_problem.pdf › CompressARC/results_for_the_blog_post/plots_training/234bbc79_problem.pdf]

sample

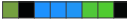

sample average

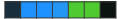

guess 1

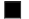

guess 2

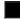

Supplement: supplementary_material [file 234bbc79_solutions.pdf › CompressARC/results_for_the_blog_post/plots_training/234bbc79_solutions.pdf]
